# Supplementary material for: Health Benefits from Upgrading Public Buses for Cleaner Air: A Case Study of Clark County, Nevada and the United States
Source: MDPI journal article supplement (doi:10.3390/ijerph16050720), 2019-02-28
Supplement: s1 [file s1]

# Health benefits from upgrading public buses for cleaner air: A case study of Clark County, Nevada and the United States

John O. Olawepo<sup>1</sup> and L.-W. Antony Chen<sup>1</sup>

<sup>1</sup>*Department of Environmental and Occupational Health, School of Community Health Sciences, University of Nevada Las Vegas, Las Vegas, NV, 89154*

## Supplementary Information

**Table S1.** Emission factors (g/mile) of diesel, gasoline, and CNG transit buses used in this assessment.

|                             | Diesel            |                   | Gasoline <sup>*</sup> | CNG <sup>*</sup> |
|-----------------------------|-------------------|-------------------|-----------------------|------------------|
|                             | High <sup>*</sup> | Low <sup>**</sup> |                       |                  |
| PM <sub>2.5</sub> (Primary) | 0.57              | 0.020             | 0.018                 | 0.0065           |
| SO <sub>2</sub>             | 0.021             | 0.009             | 0.007                 | 0.001            |
| NO <sub>x</sub>             | 19.3              | 1.21              | 0.50                  | 0.36             |
| NH <sub>3</sub>             | 0.036             | 0.010             | 0.012                 | 0.0054           |
| VOC                         | 1.51              | 0.087             | 0.15                  | 0.057            |

<sup>\*</sup> Average EFs derived from fuel-specific transit bus emissions for Clark County, Nevada (NEI 2014) and numbers based on RTC records.

<sup>\*\*</sup> Average EFs for newer diesel transit buses (model years 2015–2017) (Cai et al., 2013).

## Reference

Cai, H., Burnham, A., & Wang, M. (2013). *Updated emission factors of air pollutants from vehicle operations in GREET<sup>TM</sup> using MOVES*. Systems Assessment Section, Energy Systems Division, Argonne National Laboratory. Available from: <https://greet.es.anl.gov/publication-vehicles-13> (Accessed on 2/10/2019)

21 **Table S2.** Estimated annual health impacts and associated economic costs from the COBRA  
 22 model, if all CNG transit buses in Clark County, Nevada were replaced with “older” diesel buses  
 23 in 2017 (CC\_D scenario, upper bound). See Table 2 for COBRA input.

| Effect Description                                     | Negative Health Impacts | Economic Benefits (\$)<br>(All U.S.) |             |
|--------------------------------------------------------|-------------------------|--------------------------------------|-------------|
|                                                        |                         | 3% discount                          | 7% discount |
| Total Health Benefits (low estimate)                   |                         | -3,626,606                           | -3,236,525  |
| Total Health Benefits (high estimate)                  |                         | -8,208,132                           | -7,321,095  |
| <b>Mortality</b>                                       |                         |                                      |             |
| Adult Mortality (low estimate)                         | 0.4                     | -3,566,951                           | -3,177,027  |
| Adult Mortality (high estimate)                        | 0.9                     | -8,101,206                           | -7,215,615  |
| Infant Mortality                                       | <0.1                    | -9,756                               | -9,756      |
| <b>Cardiac Effects</b>                                 |                         |                                      |             |
| Nonfatal Heart Attacks (low estimate)                  | <0.1                    | -5,701                               | -5,545      |
| Nonfatal Heart Attacks (high estimate)                 | 0.4                     | -52,971                              | -51,526     |
| Hospital Admits, Cardiovascular (except heart attacks) | 0.1                     | -5,077                               | -5,077      |
| <b>Respiratory Effects</b>                             |                         |                                      |             |
| Hospital Admits, All Respiratory                       | 0.1                     | -2,819                               | -2,819      |
| Acute Bronchitis                                       | 0.7                     | -357                                 | -357        |
| Upper Respiratory Symptoms                             | 12.1                    | -449                                 | -449        |
| Lower Respiratory Symptoms                             | 8.5                     | -199                                 | -199        |
| Emergency Room Visits, Asthma                          | 0.2                     | -87                                  | -87         |
| Asthma Exacerbation                                    | 12.5                    | -802                                 | -802        |
| <b>Effect on Economic Activity</b>                     |                         |                                      |             |
| Minor Restricted Activity Days                         | 323.8                   | -24,608                              | -24,608     |
| Work Loss Days                                         | 54.7                    | -9,801                               | -9,801      |

**Table S3.** Estimated annual health impacts and associated economic costs from the COBRA model, if all CNG transit buses in Clark County, Nevada were replaced with “newer” diesel buses in 2017 (CC\_D scenario, lower bound). See Table 2 for COBRA input.

| Effect Description                                     | Negative Health Impacts | Economic Benefits (\$)<br>(All U.S.) |             |
|--------------------------------------------------------|-------------------------|--------------------------------------|-------------|
|                                                        |                         | 3% discount                          | 7% discount |
| Total Health Benefits (low estimate)                   |                         | -887,255                             | -791,821    |
| Total Health Benefits (high estimate)                  |                         | -2,008,102                           | -1,791,090  |
| <b>Mortality</b>                                       |                         |                                      |             |
| Adult Mortality (low estimate)                         | <0.1                    | -872,667                             | -777,270    |
| Adult Mortality (high estimate)                        | 0.2                     | -1,981,940                           | -1,765,282  |
| Infant Mortality                                       | <0.1                    | -2,386                               | -2,386      |
| <b>Cardiac Effects</b>                                 |                         |                                      |             |
| Nonfatal Heart Attacks (low estimate)                  | <0.1                    | -1,396                               | -1,358      |
| Nonfatal Heart Attacks (high estimate)                 | 0.1                     | -12,969                              | -12,615     |
| Hospital Admits, Cardiovascular (except heart attacks) | <0.1                    | -1,243                               | -1,243      |
| <b>Respiratory Effects</b>                             |                         |                                      |             |
| Hospital Admits, All Respiratory                       | <0.1                    | -691                                 | -691        |
| Acute Bronchitis                                       | 0.2                     | -87                                  | -87         |
| Upper Respiratory Symptoms                             | 3.0                     | -110                                 | -110        |
| Lower Respiratory Symptoms                             | 2.1                     | -49                                  | -49         |
| Emergency Room Visits, Asthma                          | <0.1                    | -21                                  | -21         |
| Asthma Exacerbation                                    | 3.1                     | -196                                 | -196        |
| <b>Effect on Economic Activity</b>                     |                         |                                      |             |
| Minor Restricted Activity Days                         | 79.1                    | -6,014                               | -6,014      |
| Work Loss Days                                         | 13.4                    | -2,395                               | -2,395      |

**Table S4.** Estimated annual health impacts and associated economic costs from the COBRA model, if all diesel transit buses in Clark County, Nevada were replaced with CNG buses in 2017 (CC\_N scenario). See Table 2 for COBRA input.

| Effect Description                                     | Positive Health Impacts | Economic Benefits (\$)<br>(All U.S.) |             |
|--------------------------------------------------------|-------------------------|--------------------------------------|-------------|
|                                                        |                         | 3% discount                          | 7% discount |
| Total Health Benefits (low estimate)                   |                         | 990,911                              | 884,328     |
| Total Health Benefits (high estimate)                  |                         | 2,242,734                            | 2,000,366   |
| <b>Mortality</b>                                       |                         |                                      |             |
| Adult Mortality (low estimate)                         | 0.1                     | 974,612                              | 868,071     |
| Adult Mortality (high estimate)                        | 0.2                     | 2,213,518                            | 1,971,545   |
| Infant Mortality                                       | <0.1                    | 2,666                                | 2,666       |
| <b>Cardiac Effects</b>                                 |                         |                                      |             |
| Nonfatal Heart Attacks (low estimate)                  | <0.1                    | 1,558                                | 1,515       |
| Nonfatal Heart Attacks (high estimate)                 | 0.1                     | 14,474                               | 14,079      |
| Hospital Admits, Cardiovascular (except heart attacks) | <0.1                    | 1,387                                | 1,387       |
| <b>Respiratory Effects</b>                             |                         |                                      |             |
| Hospital Admits, All Respiratory                       | <0.1                    | 770                                  | 770         |
| Acute Bronchitis                                       | 0.2                     | 97                                   | 97          |
| Upper Respiratory Symptoms                             | 3.3                     | 123                                  | 123         |
| Lower Respiratory Symptoms                             | 2.3                     | 54                                   | 54          |
| Emergency Room Visits, Asthma                          | <0.1                    | 24                                   | 24          |
| Asthma Exacerbation                                    | 3.4                     | 219                                  | 219         |
| <b>Effect on Economic Activity</b>                     |                         |                                      |             |
| Minor Restricted Activity Days                         | 88.5                    | 6,723                                | 6,723       |
| Work Loss Days                                         | 14.9                    | 2,678                                | 2,678       |

**Table S5.** Estimated annual health impacts and associated economic costs from the COBRA model, if all CNG and gasoline transit buses in the U.S. were replaced with “older” diesel buses in 2017 (US\_D scenario, upper bound). See Table 2 for COBRA input.

| Effect Description                                     | Negative Health Impacts | Economic Benefits (\$)<br>(All U.S.) |                |
|--------------------------------------------------------|-------------------------|--------------------------------------|----------------|
|                                                        |                         | 3% discount                          | 7% discount    |
| Total Health Benefits (low estimate)                   |                         | -719,432,456                         | -642,035,630   |
| Total Health Benefits (high estimate)                  |                         | -1,627,266,956                       | -1,451,470,679 |
| <b>Mortality</b>                                       |                         |                                      |                |
| Adult Mortality (low estimate)                         | 74.7                    | -707,690,862                         | -630,328,992   |
| Adult Mortality (high estimate)                        | 169.5                   | -1,605,177,581                       | -1,429,706,133 |
| Infant Mortality                                       | 0.2                     | -1,806,267                           | -1,806,267     |
| <b>Cardiac Effects</b>                                 |                         |                                      |                |
| Nonfatal Heart Attacks (low estimate)                  | 9.1                     | -1,247,836                           | -1,212,880     |
| Nonfatal Heart Attacks (high estimate)                 | 84.5                    | -11,595,617                          | -1,1270,787    |
| Hospital Admits, Cardiovascular (except heart attacks) | 26.9                    | -1,173,951                           | -1,173,951     |
| <b>Respiratory Effects</b>                             |                         |                                      |                |
| Hospital Admits, All Respiratory                       | 21.6                    | -654,274                             | -654,274       |
| Acute Bronchitis                                       | 118.7                   | -63,497                              | -63,497        |
| Upper Respiratory Symptoms                             | 2,160.5                 | -80,031                              | -80,031        |
| Lower Respiratory Symptoms                             | 1,512.8                 | -35,423                              | -35,423        |
| Emergency Room Visits, Asthma                          | 44.7                    | -21,385                              | -21,385        |
| Asthma Exacerbation                                    | 2,228.8                 | -143,379                             | -143,379       |
| <b>Effect on Economic Activity</b>                     |                         |                                      |                |
| Minor Restricted Activity Days                         | 61,372.2                | -4,664,560                           | -4,664,560     |
| Work Loss Days                                         | 10,325.6                | -1,850,992                           | -1,850,992     |

**Table S6.** Estimated annual health impacts and associated economic costs from the COBRA model, if all CNG and gasoline transit buses in the U.S. were replaced with “newer” diesel buses in 2017 (US\_D scenario, lower bound). See Table 2 for COBRA input.

| Effect Description                                     | Negative Health Impacts | Economic Benefits (\$)<br>(All U.S.) |              |
|--------------------------------------------------------|-------------------------|--------------------------------------|--------------|
|                                                        |                         | 3% discount                          | 7% discount  |
| Total Health Benefits (low estimate)                   |                         | -440,624,010                         | -393,221,451 |
| Total Health Benefits (high estimate)                  |                         | -996,628,637                         | -888,961,186 |
| <b>Mortality</b>                                       |                         |                                      |              |
| Adult Mortality (low estimate)                         | 45.8                    | -433,433,242                         | -386,052,092 |
| Adult Mortality (high estimate)                        | 103.8                   | -983,100,277                         | -875,631,776 |
| Infant Mortality                                       | 0.1                     | -1,106,456                           | -1,106,456   |
| <b>Cardiac Effects</b>                                 |                         |                                      |              |
| Nonfatal Heart Attacks (low estimate)                  | 5.6                     | -764,271                             | -742,861     |
| Nonfatal Heart Attacks (high estimate)                 | 51.8                    | - 7,101,863                          | -6,902,913   |
| Hospital Admits, Cardiovascular (except heart attacks) | 16.5                    | -718,917                             | -718,917     |
| <b>Respiratory Effects</b>                             |                         |                                      |              |
| Hospital Admits, All Respiratory                       | 13.2                    | -400,692                             | -400,692     |
| Acute Bronchitis                                       | 72.7                    | -38,887                              | -38,887      |
| Upper Respiratory Symptoms                             | 1,323.2                 | -49,015                              | -49,015      |
| Lower Respiratory Symptoms                             | 926.5                   | -21,694                              | -21,694      |
| Emergency Room Visits, Asthma                          | 27.4                    | -13,091                              | -13,091      |
| Asthma Exacerbation                                    | 1,365.0                 | -87,810                              | -87,810      |
| <b>Effect on Economic Activity</b>                     |                         |                                      |              |
| Minor Restricted Activity Days                         | 37,582.6                | -2,856,442                           | -2,856,442   |
| Work Loss Days                                         | 6,323.1                 | -1,133,494                           | -1,133,494   |

**Table S7.** Estimated annual health impacts and associated economic costs from the COBRA model, if all diesel and gasoline transit buses in the U.S. were replaced with CNG buses in 2017 (US\_N scenario). See Table 2 for COBRA input.

| Effect Description                                     | Positive Health Impacts | Economic Benefits (\$)<br>(All U.S.) |               |
|--------------------------------------------------------|-------------------------|--------------------------------------|---------------|
|                                                        |                         | 3% discount                          | 7% discount   |
| Total Health Benefits (low estimate)                   |                         | 1,096,324,170                        | 978,382,734   |
| Total Health Benefits (high estimate)                  |                         | 2,479,551,179                        | 2,211,682,702 |
| <b>Mortality</b>                                       |                         |                                      |               |
| Adult Mortality (low estimate)                         | 113.9                   | 1,078,417,794                        | 960,529,572   |
| Adult Mortality (high estimate)                        | 258.3                   | 2,445,884,259                        | 2,178,510,196 |
| Infant Mortality                                       | 0.3                     | 2,749,948                            | 2,749,948     |
| <b>Cardiac Effects</b>                                 |                         |                                      |               |
| Nonfatal Heart Attacks (low estimate)                  | 13.9                    | 1,900,932                            | 1,847,717     |
| Nonfatal Heart Attacks (high estimate)                 | 128.8                   | 17,661,475                           | 17,167,061    |
| Hospital Admits, Cardiovascular (except heart attacks) | 41.0                    | 1,787,125                            | 1,787,125     |
| <b>Respiratory Effects</b>                             |                         |                                      |               |
| Hospital Admits, All Respiratory                       | 32.9                    | 996,179                              | 996,179       |
| Acute Bronchitis                                       | 181.1                   | 96,892                               | 96,892        |
| Upper Respiratory Symptoms                             | 3,297.4                 | 122,145                              | 122,145       |
| Lower Respiratory Symptoms                             | 2,308.5                 | 54,054                               | 54,054        |
| Emergency Room Visits, Asthma                          | 68.0                    | 32,548                               | 32,548        |
| Asthma Exacerbation                                    | 3,401.5                 | 218,822                              | 218,822       |
| <b>Effect on Economic Activity</b>                     |                         |                                      |               |
| Minor Restricted Activity Days                         | 93,699.8                | 7,121,607                            | 7,121,607     |
| Work Loss Days                                         | 15,765.2                | 2,826,125                            | 2,826,125     |

44     **Table S8.** Distribution of health benefits (in \$ amount and in %) by county under the CC\_D and  
45     CC\_N scenarios.

46

47     \*See attached CC&US\_Benefits\_Distribution.xlsx

48

49

50     **Table S9.** Distribution of health benefits (in \$ amount and in %) by county under the US\_D and  
51     US\_N scenarios.

52

53     \*See attached CC&US\_Benefits\_Distribution.xlsx
