# Supplementary material for: Health Benefits from Upgrading Public Buses for Cleaner Air: A Case Study of Clark County, Nevada and the United States
Source: Int J Environ Res Public Health. 2019 Feb 28;16(5):720. doi: 10.3390/ijerph16050720 (PMC6427397; doi:10.3390/ijerph16050720)
Supplement: Supplementary file 1 [file ijerph-16-00720-s001.zip › Table_S8-S9 CC&US_Benefits_Distribution.xlsx]

## Sheet: Table S8
					Benefits in $									Fractions of Total Benefits									Mean Fraction of Benefits in ‰
					CC_D 3%		CC_D 7%		CC_N 3%		CC_N 7%			CC_D 3%		CC_D 7%		CC_N 3%		CC_N 7%
ID	destindx	FIPS	State	County	Low Estimate	High Estimate	Low Estimate	High Estimate	Low Estimate	High Estimate	Low Estimate	High Estimate		Low Estimate	High Estimate	Low Estimate	High Estimate	Low Estimate	High Estimate	Low Estimate	High Estimate		Benefits (‰)	Std. Dv.
				Total	-3.62661e+06	-8.20813e+06	-3.23653e+06	-7.3211e+06	990911	2.24273e+06	884328	2.00037e+06		1	1	1	1	1	1	1	1
54643	2283	32003	Nevada	Clark County	-1.09327e+06	-2.4777e+06	-975668	-2.2099e+06	298512	676521	266402	603399		0.301458	0.301859	0.301455	0.301854	0.30125	0.30165	0.301248	0.301644		301.552	0.240699
53439	1079	6071	California	San Bernardino County	-238650	-540546	-213045	-482184	65162.4	147594	58171.2	131658		0.0658053	0.0658549	0.0658253	0.0658623	0.0657601	0.0658097	0.0657801	0.0658171		65.8143	0.03444
55147	2787	6037	California	Los Angeles County	-89538	-202281	-79923.9	-180435	24452.1	55241.3	21826.6	49275.3		0.0246892	0.024644	0.0246944	0.0246459	0.0246763	0.0246312	0.0246815	0.0246331		24.662	0.026018
52877	517	6065	California	Riverside County	-56235.5	-127458	-50190.5	-113693	15355.9	34804.1	13705.2	31045.3		0.0155064	0.0155282	0.0155075	0.0155294	0.0154967	0.0155186	0.0154979	0.0155198		15.5131	0.012793
53115	755	49035	Utah	Salt Lake County	-50985.5	-115431	-45525.4	-102964	13937.8	31554.9	12445.2	28147.1		0.0140587	0.0140629	0.0140661	0.0140641	0.0140656	0.0140699	0.014073	0.014071		14.0664	0.00467977
53319	959	6111	California	Ventura County	-50202.5	-113366	-44806.2	-101120	13723.8	30990.8	12248.6	27643		0.0138428	0.0138115	0.0138439	0.0138121	0.0138496	0.0138183	0.0138507	0.013819		13.831	0.017261
53809	1449	6029	California	Kern County	-49668.9	-112712	-44343	-100544	13577.7	30811.6	12121.8	27485.2		0.0136957	0.0137318	0.0137008	0.0137335	0.0137023	0.0137384	0.0137074	0.0137401		13.7187	0.0188344
54458	2098	4013	Arizona	Maricopa County	-48202.3	-109123	-43022	-97328.8	13177.1	29831	11760.9	26606.8		0.0132913	0.0132945	0.0132926	0.0132943	0.0132979	0.0133012	0.0132993	0.013301		13.2965	0.00382589
52576	216	6073	California	San Diego County	-38462.3	-86773.7	-34325.1	-77390.7	10503.3	23696.2	9373.53	21133.9		0.0106056	0.0105717	0.0106055	0.0105709	0.0105997	0.0105658	0.0105996	0.010565		10.5855	0.0185836
52878	518	49049	Utah	Utah County	-26370.7	-59931.1	-23571.4	-53486.4	7208.89	16383.2	6443.65	14621.4		0.00727147	0.00730143	0.00728294	0.00730579	0.00727501	0.007305	0.00728649	0.00730936		7.29219	0.0149848
52921	561	6059	California	Orange County	-25840.3	-58259.7	-23063	-51965.2	7056.75	15910.2	6298.31	14191.2		0.0071252	0.0070978	0.00712586	0.007098	0.00712148	0.00709411	0.00712214	0.00709431		7.10986	0.0148945
53023	663	6019	California	Fresno County	-24348.8	-55175.4	-21734.9	-49219.8	6656.21	15083.2	5941.65	13455.2		0.00671393	0.00672204	0.0067155	0.00672301	0.00671726	0.00672538	0.00671883	0.00672636		6.72029	0.004596
53116	756	17031	Illinois	Cook County	-23539.9	-53277	-21012.7	-47530.9	6435.34	14564.9	5744.47	12994		0.00649088	0.00649076	0.00649237	0.00649233	0.00649437	0.00649426	0.00649585	0.00649583		6.49333	0.00203933
53727	1367	4015	Arizona	Mohave County	-19735.2	-44572.1	-17597.9	-39735.4	5388.83	12170.7	4805.23	10850		0.00544178	0.00543024	0.00543728	0.00542753	0.00543826	0.00542673	0.00543377	0.00542403		5.43245	0.00630888
53981	1621	6083	California	Santa Barbara County	-19701.5	-44525.2	-17583	-39705.9	5385.82	12171.9	4806.69	10854.4		0.00543249	0.00542452	0.00543269	0.00542349	0.00543522	0.00542725	0.00543541	0.00542622		5.42966	0.00482938
54317	1957	6079	California	San Luis Obispo County	-16548.1	-37327.9	-14761.5	-33281.7	4523.76	10204.3	4035.36	9098.23		0.00456297	0.00454767	0.00456091	0.004546	0.00456525	0.00454996	0.0045632	0.00454828		4.55553	0.00822579
54370	2010	49011	Utah	Davis County	-14463.6	-32632.5	-12915.7	-29111	3953.89	8920.68	3530.73	7958.01		0.0039882	0.00397563	0.0039906	0.00397632	0.00399016	0.00397759	0.00399256	0.00397828		3.98367	0.0073121
54571	2211	6107	California	Tulare County	-13643	-30966.5	-12179.2	-27621.3	3729.52	8465.12	3329.35	7550.66		0.00376193	0.00377266	0.00376305	0.00377284	0.00376372	0.00377446	0.00376484	0.00377464		3.76852	0.00558656
55252	2892	53033	Washington	King County	-12585.2	-28368.2	-11233.3	-25301.6	3440.54	7755.29	3070.96	6916.95		0.00347024	0.0034561	0.00347079	0.00345598	0.0034721	0.00345796	0.00347265	0.00345784		3.46421	0.00780328
55346	2986	6085	California	Santa Clara County	-12408.5	-27930.9	-11077.4	-24917.3	3392.18	7635.63	3028.3	6811.79		0.00342151	0.00340283	0.00342262	0.00340349	0.00342329	0.00340461	0.0034244	0.00340527		3.41351	0.0101617
55133	2773	49053	Utah	Washington County	-12356.9	-27929.7	-11024.3	-24905.5	3374.02	7626.11	3010.15	6800.39		0.0034073	0.00340268	0.00340621	0.00340189	0.00340497	0.00340036	0.00340388	0.00339957		3.40336	0.00273721
54644	2284	49057	Utah	Weber County	-12215.3	-27596.9	-10905	-24615.8	3339.3	7544.17	2981.1	6729.22		0.00336824	0.00336214	0.00336935	0.00336231	0.00336992	0.00336383	0.00337104	0.00336399		3.36635	0.00365017
53640	1280	6067	California	Sacramento County	-11972.7	-27091.9	-10684.6	-24165	3273.08	7406.31	2920.94	6606.16		0.00330136	0.00330062	0.00330126	0.00330073	0.0033031	0.00330236	0.003303	0.00330247		3.30186	0.000992473
52651	291	48201	Texas	Harris County	-11119.3	-25194	-9931.45	-22479.8	3039.8	6887.56	2715.07	6145.57		0.00306603	0.00306939	0.00306855	0.00307056	0.00306768	0.00307106	0.00307021	0.00307222		3.06946	0.00199019
54217	1857	4021	Arizona	Pinal County	-9892.96	-22408.8	-8829.98	-19989.4	2704.42	6125.87	2413.84	5464.48		0.00272788	0.00273008	0.00272823	0.00273039	0.00272923	0.00273143	0.00272957	0.00273174		2.72982	0.00138122
52518	158	6001	California	Alameda County	-9849.3	-22276.1	-8791.66	-19872.9	2692.57	6089.78	2403.44	5432.8		0.00271585	0.00271391	0.00271639	0.00271448	0.00271727	0.00271534	0.00271781	0.0027159		2.71587	0.001312
52577	217	4019	Arizona	Pima County	-9792.06	-22175.9	-8735.86	-19775.2	2674.14	6056.08	2385.7	5400.46		0.00270006	0.0027017	0.00269915	0.00270112	0.00269867	0.00270031	0.00269775	0.00269973		2.69981	0.00128536
54155	1795	30111	Montana	Yellowstone County	-9395.65	-21237.6	-8382.93	-18941	2568.55	5805.85	2291.7	5178.03		0.00259076	0.00258739	0.0025901	0.00258719	0.00259211	0.00258874	0.00259145	0.00258854		2.58953	0.00184734
55418	3058	48439	Texas	Tarrant County	-9339.57	-21095.1	-8338.83	-18819.2	2553.26	5767	2279.68	5144.81		0.00257529	0.00257003	0.00257648	0.00257055	0.00257668	0.00257142	0.00257787	0.00257194		2.57378	0.00312161
55148	2788	26163	Michigan	Wayne County	-8984.51	-20428.8	-8017.06	-18223.4	2456.19	5584.86	2191.71	4981.92		0.00247739	0.00248885	0.00247706	0.00248916	0.00247872	0.0024902	0.00247839	0.00249051		2.48378	0.00634546
53557	1197	6053	California	Monterey County	-8920.14	-20170.3	-7963.1	-17992	2438.52	5514.01	2176.89	4918.51		0.00245964	0.00245736	0.00246038	0.00245756	0.00246088	0.00245861	0.00246163	0.0024588		2.45936	0.00154563
53728	1368	32023	Nevada	Nye County	-8599.03	-19502.7	-7666.11	-17385.3	2350.72	5331.46	2095.69	4752.63		0.0023711	0.00237602	0.00236862	0.00237469	0.00237228	0.00237721	0.00236981	0.00237588		2.3732	0.00318918
52922	562	48113	Texas	Dallas County	-8584.24	-19438.1	-7664.81	-17341	2346.77	5314	2095.41	4740.71		0.00236702	0.00236815	0.00236822	0.00236864	0.00236829	0.00236943	0.0023695	0.00236992		2.36865	0.000938473
54218	1858	48029	Texas	Bexar County	-8166.22	-18469.6	-7289.86	-16475	2232.49	5049.23	1992.91	4503.94		0.00225175	0.00225016	0.00225237	0.00225034	0.00225296	0.00225137	0.00225358	0.00225156		2.25176	0.00119024
55242	2882	8059	Colorado	Jefferson County	-8175.47	-18456.9	-7293.95	-16458.5	2234.98	5045.68	1993.99	4499.38		0.0022543	0.00224861	0.00225364	0.0022481	0.00225548	0.00224979	0.00225481	0.00224928		2.25175	0.0030823
54459	2099	6013	California	Contra Costa County	-8129.27	-18376.7	-7253.75	-16391.2	2222.36	5023.77	1983.01	4480.99		0.00224156	0.00223884	0.00224121	0.0022389	0.00224274	0.00224002	0.00224239	0.00224008		2.24072	0.00149163
53558	1198	8041	Colorado	El Paso County	-7750.91	-17519.7	-6920.36	-15628.3	2118.92	4789.48	1891.87	4272.41		0.00213724	0.00213443	0.00213821	0.00213469	0.00213836	0.00213555	0.00213933	0.00213581		2.1367	0.00183216
53117	757	6097	California	Sonoma County	-7749.2	-17496.5	-6912.55	-15602.6	2118.46	4783.16	1889.74	4265.42		0.00213676	0.0021316	0.00213579	0.00213119	0.00213789	0.00213274	0.00213692	0.00213232		2.1344	0.0027091
53559	1199	4027	Arizona	Yuma County	-7359.23	-16631.2	-6569.88	-14837.7	2011.75	4546.37	1795.97	4056.09		0.00202923	0.00202618	0.00202992	0.0020267	0.0020302	0.00202715	0.00203089	0.00202767		2.02849	0.00178279
53519	1159	6025	California	Imperial County	-7225.93	-16447.3	-6451.07	-14676.6	1975.3	4496.09	1763.49	4012.04		0.00199248	0.00200378	0.00199321	0.0020047	0.00199342	0.00200474	0.00199415	0.00200566		1.99902	0.00613279
54156	1796	6081	California	San Mateo County	-7235.27	-16285.6	-6456.24	-14524	1977.95	4452.1	1764.98	3970.51		0.00199505	0.00198408	0.00199481	0.00198385	0.0019961	0.00198512	0.00199585	0.00198489		1.98997	0.00588822
54219	1859	8069	Colorado	Larimer County	-7051.64	-15940.6	-6294.03	-14218.8	1927.75	4357.78	1720.64	3887.07		0.00194442	0.00194205	0.00194469	0.00194216	0.00194543	0.00194306	0.0019457	0.00194318		1.94384	0.00141954
55149	2789	6077	California	San Joaquin County	-6915.29	-15630.8	-6172.26	-13942.1	1890.47	4273.08	1687.35	3811.45		0.00190682	0.0019043	0.00190706	0.00190438	0.00190781	0.0019053	0.00190806	0.00190537		1.90614	0.00149029
54572	2212	49021	Utah	Iron County	-6837.42	-15640.4	-6105.36	-13952.8	1869.03	4275.33	1668.92	3814.05		0.00188535	0.00190547	0.00188639	0.00190584	0.00188617	0.0019063	0.00188722	0.00190667		1.89618	0.010595
53024	664	8005	Colorado	Arapahoe County	-6709.91	-15139.7	-5988.67	-13502.1	1834.34	4138.84	1637.16	3691.17		0.00185019	0.00184447	0.00185034	0.00184428	0.00185116	0.00184544	0.00185131	0.00184525		1.84781	0.00319136
53214	854	35001	New Mexico	Bernalillo County	-6635.45	-15038.1	-5921.53	-13413.3	1813.98	4111.06	1618.81	3666.89		0.00182966	0.00183209	0.0018296	0.00183215	0.00183062	0.00183306	0.00183056	0.00183311		1.83136	0.0014297
53320	960	53061	Washington	Snohomish County	-6446.25	-14562.1	-5753.13	-12988.6	1762.28	3980.99	1572.79	3550.82		0.00177749	0.00177411	0.00177756	0.00177413	0.00177844	0.00177506	0.00177852	0.00177509		1.7763	0.00189111
54371	2011	49045	Utah	Tooele County	-6406.43	-14530.1	-5721.34	-12962.8	1751.31	3972.03	1564.03	3543.6		0.00176651	0.0017702	0.00176774	0.00177061	0.00176737	0.00177107	0.0017686	0.00177148		1.7692	0.00187989
53440	1080	48141	Texas	El Paso County	-6193.28	-13977.1	-5528.32	-12466	1693.11	3821.04	1511.32	3407.94		0.00170773	0.00170284	0.0017081	0.00170275	0.00170864	0.00170374	0.00170901	0.00170366		1.70581	0.00278392
54645	2285	6099	California	Stanislaus County	-6031.95	-13650.8	-5383.56	-12175.4	1648.98	3731.78	1471.73	3328.44		0.00166325	0.00166308	0.00166338	0.00166305	0.00166411	0.00166394	0.00166424	0.00166392		1.66362	0.000481641
53560	1200	26125	Michigan	Oakland County	-5993.35	-13542.5	-5347.58	-12079	1638.47	3702.26	1461.93	3302.18		0.00165261	0.00164989	0.00165226	0.00164989	0.0016535	0.00165078	0.00165315	0.00165079		1.65161	0.00144446
52519	159	40109	Oklahoma	Oklahoma County	-5979.19	-13523.6	-5337.21	-12063.6	1634.59	3697.1	1459.09	3297.95		0.0016487	0.00164759	0.00164905	0.00164779	0.00164959	0.00164848	0.00164994	0.00164867		1.64873	0.000806661
52520	160	39035	Ohio	Cuyahoga County	-5735.25	-12965.1	-5116.3	-11562.4	1567.91	3544.41	1398.7	3160.94		0.00158144	0.00157954	0.0015808	0.00157933	0.00158229	0.0015804	0.00158165	0.00158018		1.5807	0.00104201
55150	2790	36029	New York	Erie County	-5737.49	-12959.7	-5117.56	-11556.1	1568.52	3542.93	1399.05	3159.21		0.00158206	0.00157888	0.00158119	0.00157846	0.00158291	0.00157974	0.00158204	0.00157932		1.58058	0.00168165
55151	2791	16019	Idaho	Bonneville County	-5575.24	-12586.2	-4976.55	-11227.6	1524.12	3440.74	1360.46	3069.32		0.00153732	0.00153339	0.00153762	0.00153359	0.0015381	0.00153417	0.00153841	0.00153438		1.53587	0.0021729
53729	1369	20173	Kansas	Sedgwick County	-5506.73	-12440.8	-4914.89	-11095.8	1505.43	3401.06	1343.63	3033.36		0.00151843	0.00151567	0.00151857	0.00151559	0.00151924	0.00151648	0.00151938	0.0015164		1.51747	0.00159434
53215	855	42003	Pennsylvania	Allegheny County	-5492.26	-12418.3	-4898.54	-11072.7	1501.48	3394.93	1339.17	3027.07		0.00151444	0.00151293	0.00151352	0.00151243	0.00151525	0.00151375	0.00151434	0.00151326		1.51374	0.000908737
53321	961	8001	Colorado	Adams County	-5387.5	-12189.2	-4810.54	-10874.8	1472.82	3332.25	1315.09	2972.92		0.00148555	0.00148502	0.00148633	0.00148541	0.00148633	0.0014858	0.00148711	0.00148619		1.48597	0.000657211
54646	2286	29189	Missouri	St. Louis County	-5312.03	-11999.5	-4739.12	-10701.1	1452.21	3280.44	1295.58	2925.48		0.00146474	0.00146191	0.00146426	0.00146168	0.00146553	0.0014627	0.00146505	0.00146247		1.46354	0.00151824
54755	2395	41039	Oregon	Lane County	-5306.3	-12014.8	-4733	-10712.8	1450.64	3284.61	1293.91	2928.68		0.00146316	0.00146377	0.00146237	0.00146328	0.00146394	0.00146456	0.00146315	0.00146407		1.46354	0.000682801
54850	2490	31055	Nebraska	Douglas County	-4993.31	-11264.9	-4457.93	-10048.8	1365.07	3079.58	1218.71	2747.14		0.00137686	0.00137241	0.00137738	0.00137259	0.00137759	0.00137314	0.00137811	0.00137332		1.37517	0.00251006
53810	1450	16005	Idaho	Bannock County	-4965.03	-11243.2	-4431.25	-10028.5	1357.3	3073.58	1211.38	2741.51		0.00136906	0.00136977	0.00136914	0.00136981	0.00136975	0.00137046	0.00136983	0.00137051		1.36979	0.000525095
54851	2491	6089	California	Shasta County	-4922.47	-11118	-4389.62	-9911.7	1345.7	3039.43	1200.03	2709.66		0.00135732	0.00135451	0.00135628	0.00135386	0.00135805	0.00135523	0.001357	0.00135458		1.35585	0.00152396
53503	1143	6061	California	Placer County	-4857.75	-10955.7	-4333.28	-9769.95	1328	2995.05	1184.62	2670.88		0.00133948	0.00133474	0.00133887	0.00133449	0.00134018	0.00133545	0.00133957	0.0013352		1.33725	0.00247539
54852	2492	48215	Texas	Hidalgo County	-4761.8	-10771.2	-4254.93	-9614.86	1301.79	2944.64	1163.22	2628.52		0.00131302	0.00131226	0.00131466	0.00131331	0.00131373	0.00131297	0.00131537	0.00131402		1.31367	0.00100035
53520	1160	6023	California	Humboldt County	-4757.97	-10786.3	-4243.81	-9616.22	1300.73	2948.76	1160.17	2628.88		0.00131196	0.0013141	0.00131122	0.00131349	0.00131266	0.0013148	0.00131193	0.0013142		1.31305	0.00128889
53641	1281	55079	Wisconsin	Milwaukee County	-4747.85	-10754.7	-4238.23	-9593.32	1297.97	2940.12	1158.65	2622.63		0.00130917	0.00131025	0.0013095	0.00131037	0.00130988	0.00131095	0.0013102	0.00131107		1.31017	0.000655338
54220	1860	26099	Michigan	Macomb County	-4753.35	-10741.8	-4240.94	-9580.57	1299.48	2936.6	1159.39	2619.15		0.00131069	0.00130868	0.00131034	0.00130863	0.0013114	0.00130939	0.00131104	0.00130933		1.30994	0.00107207
53982	1622	53053	Washington	Pierce County	-4707.23	-10628.5	-4201.31	-9479.91	1286.86	2905.61	1148.56	2591.62		0.00129797	0.00129487	0.00129809	0.00129488	0.00129867	0.00129557	0.00129879	0.00129557		1.2968	0.00172942
53561	1201	17043	Illinois	DuPage County	-4654.2	-10500.2	-4154.81	-9369.49	1272.37	2870.56	1135.84	2561.44		0.00128335	0.00127925	0.00128372	0.00127979	0.00128404	0.00127994	0.00128441	0.00128048		1.28187	0.00219145
52428	68	4003	Arizona	Cochise County	-4634.03	-10503.6	-4134.23	-9369.05	1266.82	2871.42	1130.19	2561.25		0.00127779	0.00127966	0.00127737	0.00127973	0.00127844	0.00128032	0.00127802	0.00128039		1.27897	0.00119807
53118	758	29095	Missouri	Jackson County	-4610.38	-10431.3	-4114.69	-9303.79	1260.38	2851.7	1124.87	2543.47		0.00127126	0.00127084	0.00127133	0.00127082	0.00127194	0.00127153	0.00127201	0.0012715		1.27141	0.000441179
52718	358	47157	Tennessee	Shelby County	-4557.15	-10363.9	-4068.01	-9246.16	1245.84	2833.29	1112.12	2527.73		0.00125659	0.00126264	0.00125691	0.00126295	0.00125727	0.00126332	0.00125759	0.00126363		1.26011	0.00325696
55152	2792	8013	Colorado	Boulder County	-4539.44	-10259.8	-4052.48	-9151.6	1240.97	2804.79	1107.85	2501.83		0.0012517	0.00124996	0.00125211	0.00125003	0.00125236	0.00125061	0.00125276	0.00125069		1.25128	0.00109028
54853	2493	8031	Colorado	Denver County	-4517.43	-10246.8	-4032.95	-9140.06	1234.96	2801.24	1102.51	2498.68		0.00124564	0.00124837	0.00124607	0.00124845	0.00124629	0.00124903	0.00124672	0.00124911		1.24746	0.00142295
52578	218	53063	Washington	Spokane County	-4512.66	-10187.6	-4026.59	-9085.29	1233.67	2785.1	1100.79	2483.74		0.00124432	0.00124116	0.00124411	0.00124097	0.00124499	0.00124183	0.00124478	0.00124164		1.24298	0.00172166
54854	2494	6095	California	Solano County	-4462.47	-10113.8	-3982.04	-9022.03	1219.94	2764.88	1088.6	2466.42		0.00123048	0.00123217	0.00123034	0.00123233	0.00123113	0.00123282	0.00123099	0.00123299		1.23166	0.00104568
52579	219	19153	Iowa	Polk County	-4461.99	-10063.3	-3983.43	-8977.78	1219.82	2751.09	1088.99	2454.34		0.00123035	0.00122601	0.00123077	0.00122629	0.00123101	0.00122667	0.00123143	0.00122695		1.22868	0.00239181
53562	1202	27053	Minnesota	Hennepin County	-4448.16	-10039.9	-3970.63	-8955.68	1216.04	2744.69	1085.49	2448.3		0.00122654	0.00122316	0.00122682	0.00122327	0.00122719	0.00122382	0.00122747	0.00122393		1.22527	0.00188638
52443	83	30031	Montana	Gallatin County	-4433.85	-10013.6	-3961.09	-8937.5	1212.11	2737.47	1082.86	2443.29		0.00122259	0.00121996	0.00122387	0.00122079	0.00122322	0.0012206	0.00122451	0.00122142		1.22212	0.00166662
55153	2793	8123	Colorado	Weld County	-4341.41	-9805.59	-3876.6	-8747.96	1186.84	2680.62	1059.77	2391.49		0.0011971	0.00119462	0.00119777	0.0011949	0.00119773	0.00119525	0.00119839	0.00119553		1.19641	0.00149324
54573	2213	8077	Colorado	Mesa County	-4284.65	-9684.2	-3821.84	-8634.65	1171.31	2647.4	1044.79	2360.49		0.00118145	0.00117983	0.00118085	0.00117942	0.00118205	0.00118044	0.00118145	0.00118003		1.18069	0.000917283
54855	2495	4025	Arizona	Yavapai County	-4254.07	-9612.53	-3793.32	-8569.93	1161.81	2625.23	1035.98	2340.49		0.00117302	0.0011711	0.00117203	0.00117058	0.00117247	0.00117055	0.00117148	0.00117003		1.17141	0.00103645
53504	1144	41029	Oregon	Jackson County	-4242.46	-9566.64	-3783.46	-8529.28	1159.8	2615.33	1034.32	2331.74		0.00116982	0.00116551	0.00116899	0.00116503	0.00117044	0.00116613	0.00116961	0.00116565		1.16765	0.00226355
53983	1623	6007	California	Butte County	-4106.88	-9314.19	-3663.3	-8305.65	1122.73	2546.3	1001.47	2270.59		0.00113243	0.00113475	0.00113186	0.00113448	0.00113303	0.00113536	0.00113246	0.00113509		1.13368	0.00138043
53441	1081	17097	Illinois	Lake County	-4057.28	-9159.82	-3622.43	-8173.75	1109.18	2504.12	990.303	2234.55		0.00111875	0.00111594	0.00111924	0.00111647	0.00111936	0.00111655	0.00111984	0.00111707		1.1179	0.00154846
54221	1861	26081	Michigan	Kent County	-4024.38	-9072.84	-3592.09	-8092.35	1100.19	2480.34	982.009	2212.29		0.00110968	0.00110535	0.00110986	0.00110535	0.00111028	0.00110595	0.00111046	0.00110594		1.10786	0.00238675
54372	2012	40143	Oklahoma	Tulsa County	-3992.27	-9049.78	-3563.04	-8072.15	1091.41	2474.03	974.064	2206.77		0.00110083	0.00110254	0.00110088	0.00110259	0.00110142	0.00110313	0.00110147	0.00110318		1.10201	0.000966561
55347	2987	49005	Utah	Cache County	-3963.14	-8977.7	-3542.04	-8011.97	1083.41	2454.24	968.292	2190.24		0.0010928	0.00109376	0.0010944	0.00109437	0.00109334	0.00109431	0.00109495	0.00109492		1.0941	0.000754261
52444	84	48453	Texas	Travis County	-3958.5	-8931.05	-3537.24	-7970.62	1082.18	2441.58	967.015	2179.01		0.00109152	0.00108807	0.00109291	0.00108872	0.0010921	0.00108866	0.0010935	0.00108931		1.0906	0.00214567
54373	2013	39049	Ohio	Franklin County	-3789.87	-8590.2	-3383.42	-7663.53	1036.08	2348.4	924.965	2095.07		0.00104502	0.00104655	0.00104539	0.00104677	0.00104558	0.00104711	0.00104595	0.00104734		1.04621	0.000852116
55253	2893	55133	Wisconsin	Waukesha County	-3753.56	-8446.63	-3348.48	-7531.82	1026.15	2309.14	915.409	2059.05		0.00103501	0.00102906	0.00103459	0.00102878	0.00103556	0.00102961	0.00103515	0.00102934		1.03214	0.00316207
53442	1082	27137	Minnesota	St. Louis County	-3739.83	-8447.18	-3335.62	-7531.62	1022.39	2309.29	911.891	2058.99		0.00103122	0.00102912	0.00103062	0.00102876	0.00103177	0.00102968	0.00103117	0.00102931		1.0302	0.00112965
54856	2496	6041	California	Marin County	-3743.13	-8423.37	-3338.97	-7510.45	1023.29	2302.76	912.801	2053.19		0.00103213	0.00102622	0.00103165	0.00102586	0.00103267	0.00102677	0.0010322	0.00102641		1.02924	0.00314753
53216	856	6047	California	Merced County	-3693.62	-8400.88	-3297.71	-7494.14	1009.74	2296.58	901.506	2048.7		0.00101848	0.00102348	0.0010189	0.00102364	0.001019	0.00102401	0.00101942	0.00102416		1.02139	0.00262401
53811	1451	18089	Indiana	Lake County	-3560.32	-8063.08	-3177.14	-7192.05	973.323	2204.29	868.569	1966.17		0.000981722	0.000982328	0.000981651	0.000982373	0.00098225	0.000982858	0.000982179	0.000982904		0.982283	0.000455444
54374	2014	55025	Wisconsin	Dane County	-3529.34	-7963.7	-3150.76	-7103.74	964.851	2177.12	861.355	1942.02		0.000973179	0.00097022	0.0009735	0.000970311	0.000973701	0.000970743	0.000974022	0.000970833		0.972064	0.00167128
52719	359	6031	California	Kings County	-3517.63	-7947.29	-3141.4	-7090.74	961.605	2172.53	858.757	1938.38		0.00096995	0.000968222	0.000970609	0.000968536	0.000970425	0.000968698	0.000971084	0.000969012		0.969567	0.0010829
54101	1741	8035	Colorado	Douglas County	-3481.44	-7823.57	-3111.51	-6983.11	951.745	2138.78	850.613	1909.02		0.000959973	0.000953148	0.000961373	0.000953834	0.000960474	0.000953648	0.000961875	0.000954334		0.957332	0.0038937
54460	2100	39061	Ohio	Hamilton County	-3470.04	-7850.41	-3096.63	-7001.68	948.645	2146.15	846.562	1914.13		0.000956829	0.000956418	0.000956777	0.00095637	0.000957346	0.000956937	0.000957294	0.000956889		0.956858	0.000353196
53730	1370	48085	Texas	Collin County	-3407.96	-7661.05	-3044.16	-6836.13	931.671	2094.38	832.216	1868.87		0.000939711	0.000933349	0.000940565	0.000933757	0.000940217	0.000933853	0.000941072	0.000934262		0.937098	0.00354874
53812	1452	36055	New York	Monroe County	-3390.31	-7653.94	-3024.75	-6825.73	926.847	2092.44	826.91	1866.03		0.000934843	0.000932483	0.000934566	0.000932338	0.000935348	0.000932989	0.000935071	0.000932844		0.93381	0.00126112
53119	759	53073	Washington	Whatcom County	-3321.67	-7518.71	-2963.98	-6705.38	908.079	2055.46	810.294	1833.12		0.000915918	0.000916008	0.000915792	0.000915898	0.000916408	0.0009165	0.000916282	0.00091639		0.91615	0.000275019
54375	2015	31109	Nebraska	Lancaster County	-3291.62	-7407.44	-2938.98	-6608.52	899.86	2025.04	803.457	1806.63		0.000907631	0.000902451	0.000908068	0.000902668	0.000908113	0.000902932	0.00090855	0.00090315		0.905446	0.00284542
55154	2794	17197	Illinois	Will County	-3281.02	-7404.72	-2929.78	-6607.98	896.967	2024.31	800.944	1806.49		0.000904708	0.00090212	0.000905223	0.000902594	0.000905194	0.000902607	0.00090571	0.000903081		0.903905	0.0014427
54689	2329	20091	Kansas	Johnson County	-3277.47	-7381.93	-2925.99	-6585.41	895.994	2018.07	799.906	1800.32		0.000903729	0.000899344	0.000904053	0.000899511	0.000904212	0.000899827	0.000904536	0.000899994		0.901901	0.00240363
54857	2497	8101	Colorado	Pueblo County	-3236.22	-7334.12	-2886.41	-6538.94	884.709	2004.98	789.078	1787.6		0.000892356	0.000893519	0.000891823	0.000893164	0.000892824	0.000893989	0.000892291	0.000893634		0.89295	0.000755016
52361	1	4007	Arizona	Gila County	-3216.86	-7315.92	-2868.73	-6523.54	879.4	1999.97	784.231	1783.36		0.000887016	0.000891301	0.000886361	0.000891061	0.000887466	0.000891755	0.00088681	0.000891515		0.889161	0.00242892
54222	1862	53005	Washington	Benton County	-3220.56	-7265.25	-2874.06	-6479.8	880.431	1986.16	785.705	1771.44		0.000888037	0.000885128	0.000888007	0.000885086	0.000888507	0.000885599	0.000888477	0.000885556		0.8868	0.0015781
53443	1083	6087	California	Santa Cruz County	-3161.63	-7147.23	-2821.77	-6374.31	864.314	1953.88	771.404	1742.58		0.000871789	0.00087075	0.000871852	0.000870677	0.000872242	0.000871204	0.000872305	0.000871131		0.871494	0.000640277
52580	220	49003	Utah	Box Elder County	-3095.48	-7011.13	-2762.96	-6252.91	846.214	1916.64	755.313	1709.36		0.000853548	0.000854169	0.000853682	0.000854095	0.000853976	0.000854598	0.000854109	0.000854524		0.854088	0.000363869
52720	360	48303	Texas	Lubbock County	-3088.89	-7002.57	-2757.32	-6246.52	844.439	1914.36	753.796	1707.67		0.000851729	0.000853126	0.000851939	0.000853222	0.000852185	0.000853584	0.000852394	0.00085368		0.852732	0.000762227
54858	2498	48061	Texas	Cameron County	-3069.73	-6933.35	-2741.9	-6187.88	839.207	1895.44	749.582	1691.65		0.000846448	0.000844692	0.000847173	0.000845212	0.000846904	0.000845149	0.000847629	0.000845669		0.84611	0.00107672
52652	292	53077	Washington	Yakima County	-3052.8	-6912.73	-2724.58	-6166.32	834.572	1889.8	744.844	1685.74		0.000841778	0.00084218	0.000841822	0.000842267	0.000842227	0.000842631	0.000842271	0.000842718		0.842237	0.00033282
52721	361	48121	Texas	Denton County	-3030.42	-6822.7	-2707.5	-6088.67	828.46	1865.2	740.178	1664.53		0.000835609	0.000831213	0.000836545	0.000831661	0.000836059	0.000831663	0.000836995	0.00083211		0.833982	0.00252262
54535	2175	17201	Illinois	Winnebago County	-3010.64	-6819.26	-2686.56	-6082.96	823.05	1864.25	734.454	1662.96		0.000830154	0.000830793	0.000830077	0.000830881	0.000830599	0.000831241	0.000830522	0.000831329		0.830699	0.000456312
52362	2	42101	Pennsylvania	Philadelphia County	-2997.45	-6826.75	-2675.2	-6088.91	819.447	1866.31	731.351	1664.6		0.000826515	0.000831706	0.000826565	0.000831694	0.000826963	0.000832159	0.000827014	0.000832147		0.829346	0.00276987
52722	362	46099	South Dakota	Minnehaha County	-3003.67	-6790.69	-2682.33	-6059.99	821.14	1856.43	733.292	1656.67		0.000828232	0.000827313	0.000828769	0.000827744	0.000828671	0.000827753	0.000829208	0.000828185		0.828234	0.000626723
53322	962	18097	Indiana	Marion County	-2994.84	-6795.04	-2673.43	-6061.86	818.732	1857.64	730.865	1657.2		0.000825796	0.000827843	0.000826018	0.000828	0.000826241	0.000828291	0.000826463	0.000828448		0.827138	0.00110823
53542	1182	36047	New York	Kings County	-2996.17	-6775.16	-2675.33	-6044.72	819.098	1852.21	731.388	1652.52		0.000826163	0.00082542	0.000826607	0.000825658	0.000826611	0.00082587	0.000827055	0.000826107		0.826186	0.00054579
53521	1161	6017	California	El Dorado County	-2963.05	-6696.8	-2643.26	-5971.58	810.029	1830.75	722.606	1632.49		0.000817032	0.000815874	0.000816697	0.000815668	0.000817459	0.000816302	0.000817125	0.000816097		0.816532	0.000644769
54647	2287	39113	Ohio	Montgomery County	-2956.45	-6695.3	-2637.5	-5970.38	808.237	1830.37	721.043	1632.19		0.000815211	0.000815691	0.000814917	0.000815504	0.000815651	0.000816133	0.000815357	0.000815946		0.815551	0.000393223
54859	2499	21111	Kentucky	Jefferson County	-2929.66	-6638.35	-2614.49	-5922.15	800.913	1814.8	714.752	1619		0.000807823	0.000808753	0.000807806	0.000808915	0.00080826	0.000809192	0.000808242	0.000809354		0.808543	0.000596733
52723	363	17089	Illinois	Kane County	-2924.48	-6607.1	-2611.7	-5896.51	799.497	1806.25	713.988	1611.99		0.000806397	0.000804945	0.000806946	0.000805413	0.00080683	0.000805379	0.000807379	0.000805847		0.806142	0.000874004
53984	1624	56029	Wyoming	Park County	-2886.9	-6515.96	-2574.93	-5809.57	789.206	1781.3	703.92	1588.19		0.000796034	0.000793842	0.000795584	0.000793539	0.000796445	0.000794253	0.000795995	0.000793949		0.794955	0.00117161
52879	519	46103	South Dakota	Pennington County	-2861.98	-6450.79	-2554.82	-5755.77	782.402	1763.5	698.432	1573.5		0.000789163	0.000785902	0.000789372	0.00078619	0.000789578	0.000786317	0.000789788	0.000786605		0.787864	0.00174163
53563	1203	26049	Michigan	Genesee County	-2838.9	-6440.5	-2533.26	-5745.51	776.102	1760.71	692.545	1570.71		0.000782799	0.000784649	0.00078271	0.000784788	0.00078322	0.000785073	0.000783132	0.000785213		0.783948	0.00107627
53217	857	49027	Utah	Millard County	-2825.67	-6373.03	-2520.59	-5681.95	772.431	1742.14	689.034	1553.23		0.00077915	0.000776429	0.000778795	0.000776107	0.000779516	0.000776793	0.000779161	0.000776471		0.777803	0.00147048
52363	3	41005	Oregon	Clackamas County	-2780.83	-6280.03	-2480.6	-5600.36	760.225	1716.84	678.147	1531.03		0.000766787	0.000765099	0.00076644	0.000764962	0.000767198	0.000765511	0.00076685	0.000765374		0.766028	0.000885132
55291	2931	47037	Tennessee	Davidson County	-2753.61	-6252.96	-2458.26	-5578.99	752.787	1709.44	672.041	1525.19		0.000759281	0.0007618	0.000759535	0.000762043	0.000759691	0.000762214	0.000759946	0.000762456		0.760871	0.00136859
54318	1958	1073	Alabama	Jefferson County	-2736.15	-6202.71	-2441.43	-5531.68	748.015	1695.71	667.444	1512.26		0.000754467	0.000755679	0.000754338	0.00075558	0.000754876	0.00075609	0.000754747	0.000755992		0.755221	0.000694876
53543	1183	12099	Florida	Palm Beach County	-2703.13	-6123.13	-2411.16	-5460.33	738.987	1673.96	659.169	1492.76		0.00074536	0.000745984	0.000744985	0.000745835	0.000745766	0.000746391	0.00074539	0.000746243		0.745744	0.000475581
54648	2288	49041	Utah	Sevier County	-2687.39	-6066.03	-2397.14	-5408.06	734.634	1658.23	655.289	1478.36		0.000741021	0.000739027	0.000740651	0.000738696	0.000741372	0.000739378	0.000741002	0.000739047		0.740024	0.00108826
53323	963	29077	Missouri	Greene County	-2658.38	-6021.61	-2371.84	-5369.77	726.749	1646.19	648.414	1467.99		0.000733022	0.000733616	0.000732834	0.000733466	0.000733415	0.000734011	0.000733227	0.000733861		0.733432	0.000400399
55348	2988	9003	Connecticut	Hartford County	-2639.7	-5965.88	-2355.36	-5321.64	721.646	1630.96	643.913	1454.84		0.000727871	0.000726825	0.000727743	0.000726892	0.000728265	0.000727221	0.000728138	0.000727288		0.72753	0.000551604
52724	364	56021	Wyoming	Laramie County	-2603.88	-5878	-2323.31	-5241.38	711.841	1606.91	635.138	1432.87		0.000717995	0.000716119	0.000717841	0.000715929	0.00071837	0.000716495	0.000718216	0.000716305		0.717159	0.00103605
53564	1204	6045	California	Mendocino County	-2598.54	-5864.95	-2317.69	-5229.37	710.388	1603.35	633.609	1429.6		0.000716522	0.000714529	0.000716106	0.000714288	0.000716903	0.00071491	0.000716486	0.000714669		0.715552	0.00105445
53813	1453	36059	New York	Nassau County	-2568.43	-5792.39	-2291.68	-5166.24	702.163	1583.53	626.504	1412.36		0.000708219	0.000705689	0.000708068	0.000705664	0.000708603	0.000706073	0.000708452	0.000706049		0.707102	0.00133588
53025	665	39095	Ohio	Lucas County	-2527.55	-5715.16	-2255.43	-5097.71	690.984	1562.42	616.591	1393.62		0.000696947	0.000696281	0.000696867	0.000696304	0.000697322	0.000696657	0.000697242	0.00069668		0.696787	0.000386128
53218	858	53011	Washington	Clark County	-2526.85	-5704.68	-2254.68	-5087.85	690.792	1559.55	616.385	1390.92		0.000696755	0.000695003	0.000696635	0.000694957	0.000697128	0.000695378	0.000697009	0.000695332		0.696025	0.000939129
53814	1454	48491	Texas	Williamson County	-2526.84	-5685.12	-2256.6	-5072.6	690.79	1554.2	616.911	1386.75		0.000696751	0.00069262	0.000697229	0.000692874	0.000697126	0.000692995	0.000697604	0.000693249		0.695056	0.00228604
52725	365	16001	Idaho	Ada County	-2514.99	-5671.14	-2245.14	-5059.51	687.545	1550.37	613.774	1383.16		0.000693484	0.000690917	0.000693689	0.000691086	0.000693852	0.000691285	0.000694056	0.000691454		0.692478	0.00139916
54860	2500	25017	Massachusetts	Middlesex County	-2513.7	-5672.23	-2243.18	-5059.69	687.201	1550.68	613.244	1383.23		0.000693129	0.00069105	0.000693082	0.000691111	0.000693504	0.000691426	0.000693458	0.000691487		0.692281	0.00110123
53815	1455	35013	New Mexico	Dona Ana County	-2502.69	-5647.45	-2233.73	-5037.78	684.181	1543.89	610.653	1377.22		0.000690091	0.000688031	0.000690163	0.000688119	0.000690456	0.000688396	0.000690528	0.000688484		0.689283	0.00111484
53324	964	39153	Ohio	Summit County	-2485.91	-5615.88	-2217.64	-5007.88	679.602	1535.28	606.261	1369.06		0.000685466	0.000684185	0.000685191	0.000684035	0.000685836	0.000684556	0.000685561	0.000684405		0.684904	0.000690911
55155	2795	5119	Arkansas	Pulaski County	-2477.02	-5618.84	-2210.44	-5011.7	677.171	1536.08	604.292	1370.1		0.000683013	0.000684545	0.000682966	0.000684556	0.000683382	0.000684916	0.000683334	0.000684927		0.683955	0.000858239
52445	85	22051	Louisiana	Jefferson Parish	-2474.14	-5611.57	-2207.81	-5004.92	676.385	1534.1	603.574	1368.25		0.000682219	0.00068366	0.000682153	0.00068363	0.000682589	0.000684032	0.000682523	0.000684002		0.683101	0.000805587
52653	293	41033	Oregon	Josephine County	-2473.35	-5580.45	-2205.13	-4974.68	676.166	1525.58	602.839	1359.98		0.000682002	0.000679868	0.000681326	0.000679499	0.000682368	0.000680235	0.000681692	0.000679866		0.680857	0.00111499
53565	1205	41017	Oregon	Deschutes County	-2462.05	-5555.49	-2196.37	-4954.3	673.073	1518.76	600.442	1354.4		0.000678884	0.000676827	0.000678619	0.000676715	0.000679247	0.00067719	0.000678981	0.000677078		0.677943	0.00108163
55349	2989	27123	Minnesota	Ramsey County	-2460.83	-5553.47	-2196.29	-4953.17	672.741	1518.21	600.42	1354.1		0.000678549	0.000676582	0.000678595	0.000676561	0.000678911	0.000676945	0.000678957	0.000676924		0.677753	0.00108657
54861	2501	32019	Nevada	Lyon County	-2447.51	-5534.45	-2183.15	-4935.07	669.095	1513	596.826	1349.14		0.000674877	0.000674265	0.000674537	0.000674088	0.000675232	0.000674621	0.000674892	0.000674445		0.67462	0.00037045
54690	2330	34029	New Jersey	Ocean County	-2442.63	-5522.08	-2178.65	-4924.82	667.77	1509.64	595.602	1346.36		0.00067353	0.000672757	0.000673144	0.000672689	0.000673895	0.000673124	0.000673508	0.000673055		0.673213	0.000409386
52880	520	30013	Montana	Cascade County	-2436.34	-5511.37	-2173.49	-4915.01	666.042	1506.69	594.184	1343.65		0.000671796	0.000671452	0.00067155	0.000671348	0.000672151	0.000671808	0.000671904	0.000671704		0.671714	0.000259703
54223	1863	9009	Connecticut	New Haven County	-2420.81	-5475.64	-2160.21	-4884.45	661.807	1496.94	590.563	1335.32		0.000667515	0.000667099	0.000667448	0.000667175	0.000667877	0.000667462	0.00066781	0.000667538		0.667491	0.00026986
54649	2289	36081	New York	Queens County	-2352.41	-5299.97	-2100.11	-4727.87	643.106	1448.92	574.133	1292.51		0.000648653	0.000645697	0.000648879	0.000645787	0.000649005	0.000646049	0.000649231	0.000646139		0.64743	0.00162966
53444	1084	17111	Illinois	McHenry County	-2333.08	-5273.45	-2082.91	-4705.42	637.82	1441.66	569.426	1286.37		0.000643324	0.000642467	0.000643563	0.00064272	0.00064367	0.000642813	0.000643908	0.000643067		0.643192	0.000507679
54461	2101	25027	Massachusetts	Worcester County	-2308.52	-5215.31	-2059.76	-4651.81	631.107	1425.77	563.101	1271.72		0.000636551	0.000635384	0.000636411	0.000635398	0.000636896	0.00063573	0.000636756	0.000635744		0.636109	0.00061324
54574	2214	48355	Texas	Nueces County	-2305.5	-5218.35	-2057.64	-4654.71	630.28	1426.6	562.519	1272.51		0.000635718	0.000635754	0.000635755	0.000635795	0.000636061	0.000636098	0.000636098	0.000636139		0.635927	0.000185929
55104	2744	27037	Minnesota	Dakota County	-2309.84	-5202.45	-2061.83	-4640.85	631.462	1422.24	563.664	1268.71		0.000636914	0.000633816	0.000637052	0.000633901	0.000637254	0.000634156	0.000637392	0.000634241		0.635591	0.00168114
53924	1564	49039	Utah	Sanpete County	-2300.07	-5224.22	-2052.52	-4658.61	628.761	1428.12	561.089	1273.5		0.000634221	0.000636468	0.000634173	0.000636327	0.000634528	0.000636777	0.00063448	0.000636636		0.635451	0.00118957
53642	1282	6039	California	Madera County	-2265.17	-5131.11	-2021.83	-4577.29	619.237	1402.71	552.715	1251.31		0.000624598	0.000625125	0.000624693	0.00062522	0.000624916	0.000625445	0.000625011	0.00062554		0.625069	0.000333467
54462	2102	19113	Iowa	Linn County	-2244.67	-5062.61	-2003.27	-4515.87	613.649	1384.02	547.653	1234.55		0.000618947	0.00061678	0.000618956	0.00061683	0.000619278	0.000617111	0.000619287	0.000617161		0.618044	0.00116094
54575	2215	41019	Oregon	Douglas County	-2240.44	-5062.07	-1997.75	-4512.99	612.493	1383.87	546.146	1233.76		0.00061778	0.000616714	0.000617252	0.000616437	0.000618111	0.000617046	0.000617583	0.000616769		0.617211	0.000578546
54756	2396	17119	Illinois	Madison County	-2238.04	-5062.48	-1996.89	-4515.37	611.837	1383.98	545.912	1234.41		0.000617117	0.000616764	0.000616987	0.000616761	0.000617449	0.000617097	0.000617319	0.000617094		0.617073	0.000240453
55156	2796	48479	Texas	Webb County	-2236.02	-5046.87	-1998.57	-4504.47	611.284	1379.72	546.37	1231.43		0.00061656	0.000614862	0.000617505	0.000615273	0.000616891	0.000615194	0.000617837	0.000615604		0.616216	0.0011342
54862	2502	32510	Nevada	Carson City	-2194.68	-4964.26	-1957.01	-4425.63	599.976	1357.12	535.003	1209.87		0.00060516	0.000604798	0.000604664	0.000604504	0.000605479	0.000605118	0.000604983	0.000604824		0.604941	0.000310129
54091	1731	9001	Connecticut	Fairfield County	-2156.6	-4872.37	-1924.84	-4347.16	589.575	1332.02	526.216	1188.43		0.00059466	0.000593603	0.000594723	0.000593785	0.000594982	0.000593926	0.000595046	0.000594109		0.594354	0.000564981
53325	965	42091	Pennsylvania	Montgomery County	-2156.06	-4862.18	-1923.34	-4335.67	589.427	1329.23	525.807	1185.29		0.000594511	0.000592362	0.000594261	0.000592216	0.000594833	0.000592684	0.000594583	0.000592538		0.593498	0.00113946
54863	2503	16011	Idaho	Bingham County	-2134.27	-4837.43	-1905.31	-4315.61	583.452	1322.42	520.861	1179.77		0.000588503	0.000589346	0.00058869	0.000589476	0.000588803	0.000589648	0.000588991	0.000589778		0.589154	0.000472583
54376	2016	48339	Texas	Montgomery County	-2114.42	-4780.22	-1887.61	-4264.27	578.042	1306.82	516.036	1165.77		0.00058303	0.000582376	0.00058322	0.000582463	0.000583344	0.000582691	0.000583535	0.000582779		0.58293	0.00042011
53643	1283	36119	New York	Westchester County	-2110.33	-4755.56	-1883.12	-4241.41	576.926	1300.09	514.811	1159.52		0.000581902	0.000579372	0.000581834	0.000579341	0.000582217	0.000579688	0.00058215	0.000579656		0.58077	0.00135325
52726	366	55009	Wisconsin	Brown County	-2060.28	-4650.42	-1838.77	-4148.06	563.239	1271.33	502.685	1134		0.0005681	0.000566563	0.000568132	0.000566591	0.000568405	0.000566868	0.000568437	0.000566896		0.567499	0.000839042
52881	521	27003	Minnesota	Anoka County	-2060.35	-4643.62	-1839.52	-4142.88	563.258	1269.47	502.886	1132.58		0.000568122	0.000565734	0.000568361	0.000565883	0.000568425	0.000566037	0.000568665	0.000566186		0.567176	0.00131505
54691	2331	24005	Maryland	Baltimore County	-2044.26	-4625.7	-1823.87	-4125.54	558.864	1264.58	498.613	1127.85		0.000563685	0.000563551	0.000563527	0.000563514	0.00056399	0.000563858	0.000563833	0.00056382		0.563722	0.0001788
55134	2774	41067	Oregon	Washington County	-2036.02	-4586.5	-1817.5	-4091.49	556.607	1253.86	496.87	1118.53		0.000561411	0.000558775	0.00056156	0.000558864	0.000561713	0.000559076	0.000561861	0.000559165		0.560303	0.00143577
54319	1959	6113	California	Yolo County	-2025.07	-4574.75	-1807.45	-4080.2	553.61	1250.64	494.116	1115.44		0.000558393	0.000557343	0.000558453	0.000557321	0.000558688	0.000557639	0.000558748	0.000557616		0.558025	0.000604428
52581	221	53009	Washington	Clallam County	-2023.25	-4571.68	-1803.96	-4075.78	553.118	1249.81	493.168	1114.24		0.000557891	0.000556969	0.000557376	0.000556718	0.000558192	0.00055727	0.000557676	0.000557018		0.557389	0.000501026
52446	86	17163	Illinois	St. Clair County	-2003.1	-4543.49	-1787.74	-4052.88	547.61	1242.1	488.733	1107.98		0.000552335	0.000553535	0.000552363	0.00055359	0.000552633	0.000553834	0.00055266	0.000553889		0.553105	0.000668587
53026	666	38017	North Dakota	Cass County	-2000.5	-4524.91	-1786.79	-4038.57	546.894	1237.01	488.472	1104.06		0.000551618	0.000551272	0.000552072	0.000551634	0.000551911	0.000551566	0.000552365	0.000551929		0.551796	0.000341421
53120	760	42049	Pennsylvania	Erie County	-1977.75	-4466.37	-1764.36	-3982.91	540.678	1221.02	482.344	1088.85		0.000545343	0.00054414	0.000545141	0.000544032	0.000545638	0.000544435	0.000545435	0.000544327		0.544811	0.000643414
53644	1284	36067	New York	Onondaga County	-1970.59	-4447.61	-1758	-3965.95	538.723	1215.89	480.604	1084.22		0.00054337	0.000541854	0.000543174	0.000541716	0.000543664	0.000542148	0.000543468	0.00054201		0.542675	0.000815352
53731	1371	1097	Alabama	Mobile County	-1962.56	-4450.9	-1751.19	-3969.46	536.529	1216.8	478.744	1085.18		0.000541157	0.000542255	0.000541071	0.000542194	0.000541451	0.00054255	0.000541365	0.00054249		0.541817	0.000615868
53816	1456	42129	Pennsylvania	Westmoreland County	-1964.09	-4436.43	-1751.64	-3955.98	536.945	1212.84	478.867	1081.49		0.000541577	0.000540492	0.000541211	0.000540354	0.00054187	0.000540786	0.000541503	0.000540647		0.541055	0.000561717
54536	2176	36005	New York	Bronx County	-1950.66	-4419.46	-1741.71	-3942.92	533.276	1208.2	476.151	1077.92		0.000537876	0.000538424	0.000538141	0.00053857	0.000538167	0.000538718	0.000538433	0.000538863		0.538399	0.000325606
54757	2397	38015	North Dakota	Burleigh County	-1925.04	-4362.23	-1718.45	-3892.53	526.264	1192.54	469.786	1064.13		0.000530811	0.000531453	0.000530955	0.000531687	0.000531091	0.000531735	0.000531235	0.000531969		0.531367	0.000410602
55254	2894	38101	North Dakota	Ward County	-1912.34	-4345.74	-1706.63	-3876.66	522.793	1188.03	466.556	1059.79		0.000527309	0.000529443	0.000527304	0.000529519	0.000527588	0.000529724	0.000527583	0.0005298		0.528534	0.00117299
53566	1206	24031	Maryland	Montgomery County	-1919.34	-4317.61	-1713.17	-3850.9	524.712	1180.36	468.348	1052.77		0.000529238	0.000526017	0.000529323	0.000526001	0.000529525	0.000526303	0.000529609	0.000526287		0.527788	0.0017559
54102	1742	48309	Texas	McLennan County	-1900.87	-4314.58	-1696.21	-3848.04	519.662	1179.52	463.71	1051.98		0.000524146	0.000525646	0.000524082	0.000525609	0.000524428	0.000525931	0.000524365	0.000525893		0.525013	0.000824167
54650	2290	47093	Tennessee	Knox County	-1895.76	-4301.45	-1691.72	-3837.15	518.265	1175.94	462.484	1049		0.000522736	0.000524048	0.000522695	0.000524122	0.000523019	0.000524332	0.000522978	0.000524407		0.523542	0.000748581
55292	2932	41035	Oregon	Klamath County	-1883.05	-4265.66	-1679.33	-3803.15	514.786	1166.14	459.095	1039.7		0.000519231	0.000519687	0.000518869	0.000519479	0.000519508	0.000519966	0.000519146	0.000519757		0.519455	0.000358312
54576	2216	41047	Oregon	Marion County	-1881.28	-4247.79	-1678.77	-3788.71	514.304	1161.26	458.942	1035.76		0.000518743	0.00051751	0.000518694	0.000517505	0.000519021	0.000517789	0.000518973	0.000517784		0.518252	0.000664277
53544	1184	39151	Ohio	Stark County	-1875.77	-4235.06	-1673.38	-3776.98	512.8	1157.79	457.472	1032.56		0.000517224	0.000515958	0.000517031	0.000515904	0.000517504	0.000516238	0.00051731	0.000516184		0.516669	0.000661061
54122	1762	26139	Michigan	Ottawa County	-1873.48	-4224.66	-1672.26	-3768.53	512.174	1154.94	457.165	1030.24		0.000516594	0.000514692	0.000516685	0.00051475	0.000516872	0.00051497	0.000516963	0.000515028		0.515819	0.00103723
52727	367	30029	Montana	Flathead County	-1869.17	-4233.52	-1667.72	-3775.85	510.992	1157.36	455.921	1032.24		0.000515404	0.000515772	0.000515281	0.00051575	0.000515679	0.000516048	0.000515556	0.000516026		0.51569	0.000272326
53567	1207	18141	Indiana	St. Joseph County	-1868.16	-4223.73	-1667.34	-3767.86	510.72	1154.69	455.819	1030.06		0.000515127	0.000514579	0.000515164	0.000514658	0.000515404	0.000514857	0.000515441	0.000514936		0.515021	0.000320022
54224	1864	48167	Texas	Galveston County	-1861.61	-4222.95	-1661.46	-3767.21	508.928	1154.48	454.211	1029.88		0.000513319	0.000514484	0.000513345	0.000514569	0.000513596	0.000514763	0.000513623	0.000514848		0.514068	0.000656808
54864	2504	19163	Iowa	Scott County	-1854.06	-4183.25	-1654.49	-3731.11	506.864	1143.62	452.305	1020.01		0.000511239	0.000509647	0.000511193	0.000509638	0.000511513	0.000509922	0.000511467	0.000509913		0.510566	0.000853709
52364	4	26077	Michigan	Kalamazoo County	-1838.73	-4158.17	-1640.82	-3708.73	502.675	1136.76	448.568	1013.9		0.000507012	0.000506591	0.000506969	0.000506581	0.000507285	0.000506865	0.000507242	0.000506855		0.506925	0.000261238
52728	368	41059	Oregon	Umatilla County	-1837.99	-4144.92	-1639.64	-3695.72	502.467	1133.13	448.241	1010.33		0.000506809	0.000504977	0.000506605	0.000504804	0.000507076	0.000505244	0.000506872	0.000505071		0.505932	0.000986645
53445	1085	48027	Texas	Bell County	-1828.33	-4135.68	-1632.93	-3690.35	499.831	1130.62	446.413	1008.87		0.000504144	0.000503852	0.000504533	0.000504071	0.000504415	0.000504124	0.000504805	0.000504343		0.504286	0.000300248
53925	1565	17167	Illinois	Sangamon County	-1810.42	-4089.63	-1615.57	-3648.01	494.934	1118.03	441.666	997.295		0.000499206	0.000498241	0.000499169	0.000498287	0.000499474	0.00049851	0.000499437	0.000498556		0.49886	0.000514145
55419	3059	42017	Pennsylvania	Bucks County	-1798.16	-4061.54	-1603.96	-3621.75	491.584	1110.35	438.494	990.122		0.000495825	0.00049482	0.000495582	0.000494701	0.000496093	0.000495089	0.00049585	0.00049497		0.495366	0.000533724
53645	1285	40027	Oklahoma	Cleveland County	-1784.11	-4030.86	-1592.89	-3596.41	487.74	1101.96	435.464	983.188		0.000491949	0.000491081	0.00049216	0.000491239	0.000492213	0.000491346	0.000492424	0.000491504		0.49174	0.000508249
54320	1960	48157	Texas	Fort Bend County	-1784.61	-4025.52	-1594.29	-3592.38	487.879	1100.5	435.85	982.09		0.000492088	0.00049043	0.000492594	0.000490689	0.000492354	0.000490696	0.00049286	0.000490955		0.491583	0.000986266
52882	522	22033	Louisiana	East Baton Rouge Parish	-1773.14	-4032.38	-1582.58	-3596.7	484.745	1102.38	432.649	983.273		0.000488926	0.000491267	0.000488976	0.00049128	0.000489191	0.000491534	0.00048924	0.000491547		0.490245	0.00125021
53121	761	32001	Nevada	Churchill County	-1774.32	-4011.16	-1582.71	-3576.65	485.059	1096.56	432.677	977.772		0.000489251	0.000488681	0.000489015	0.00048854	0.000489508	0.000488938	0.000489271	0.000488797		0.489	0.00032813
53027	667	34003	New Jersey	Bergen County	-1767.4	-3982.02	-1576.88	-3551.32	483.175	1088.61	431.09	970.867		0.000487342	0.000485131	0.000487214	0.000485081	0.000487606	0.000485395	0.000487478	0.000485345		0.486324	0.00117074
54225	1865	48441	Texas	Taylor County	-1761.63	-3993.15	-1572.35	-3561.64	481.595	1091.65	429.85	973.684		0.000485751	0.000486488	0.000485815	0.00048649	0.000486012	0.00048675	0.000486076	0.000486753		0.486267	0.000403539
52883	523	48135	Texas	Ector County	-1759.93	-3992.23	-1570.76	-3561.16	481.131	1091.4	429.416	973.549		0.000485284	0.000486375	0.000485324	0.000486424	0.000485544	0.000486636	0.000485584	0.000486686		0.485982	0.000602688
53926	1566	41051	Oregon	Multnomah County	-1749.3	-3958.43	-1561.11	-3530.45	478.223	1082.15	426.776	965.155		0.000482351	0.000482257	0.000482341	0.00048223	0.000482609	0.000482516	0.0004826	0.000482489		0.482424	0.000149141
53985	1625	6055	California	Napa County	-1747.71	-3947.65	-1559.12	-3520.38	477.785	1079.2	426.229	962.395		0.000481913	0.000480944	0.000481726	0.000480854	0.000482168	0.0004812	0.000481981	0.000481109		0.481487	0.000516308
54463	2103	48375	Texas	Potter County	-1747.41	-3945.47	-1559.74	-3519.27	477.705	1078.61	426.4	962.096		0.000481829	0.000480678	0.000481917	0.000480703	0.000482086	0.000480935	0.000482174	0.00048096		0.48141	0.00064757
54577	2217	47065	Tennessee	Hamilton County	-1743.32	-3946.07	-1555.4	-3519.7	476.592	1078.78	425.217	962.221		0.000480703	0.000480751	0.000480577	0.000480761	0.000480963	0.000481012	0.000480837	0.000481023		0.480828	0.000160138
54865	2505	51059	Virginia	Fairfax County	-1743.18	-3928.42	-1557.27	-3506.8	476.552	1073.96	425.73	958.694		0.000480663	0.000478601	0.000481156	0.000478999	0.000480923	0.000478861	0.000481416	0.000479259		0.479985	0.00116114
55157	2797	53067	Washington	Thurston County	-1741.66	-3930.8	-1554.02	-3505.56	476.136	1074.6	424.839	958.351		0.000480245	0.000478891	0.000480151	0.00047883	0.000480503	0.000479149	0.000480408	0.000479088		0.479658	0.000729243
52729	369	26121	Michigan	Muskegon County	-1739.58	-3926.13	-1551.78	-3500.98	475.567	1073.33	424.227	957.101		0.000479671	0.000478322	0.000479458	0.000478205	0.000479929	0.00047858	0.000479716	0.000478463		0.479043	0.000715085
54758	2398	53057	Washington	Skagit County	-1734.33	-3909.65	-1547.08	-3486.33	474.132	1068.82	422.941	953.092		0.000478225	0.000476314	0.000478007	0.000476203	0.000478481	0.00047657	0.000478263	0.000476459		0.477315	0.00100663
52365	5	36061	New York	New York County	-1729.27	-3893.71	-1543.74	-3472.95	472.75	1064.47	422.03	949.441		0.000476828	0.000474373	0.000476973	0.000474376	0.000477086	0.000474631	0.000477232	0.000474634		0.475767	0.00135871
54759	2399	5007	Arkansas	Benton County	-1721.85	-3905.08	-1537.79	-3485.12	470.72	1067.57	420.401	952.763		0.000474783	0.000475757	0.000475136	0.000476038	0.000475037	0.000476014	0.000475391	0.000476294		0.475556	0.000547489
53646	1286	55139	Wisconsin	Winnebago County	-1725.5	-3896.57	-1539.62	-3475.28	471.717	1065.25	420.901	950.073		0.000475789	0.000474721	0.000475701	0.000474694	0.000476044	0.000474976	0.000475956	0.00047495		0.475354	0.000571961
52884	524	53027	Washington	Grays Harbor County	-1723.81	-3899.5	-1537.57	-3477.74	471.257	1066.05	420.341	950.747		0.000475324	0.000475078	0.000475067	0.00047503	0.00047558	0.000475335	0.000475323	0.000475286		0.475253	0.00018487
53732	1372	29047	Missouri	Clay County	-1720.71	-3879.16	-1536.09	-3460.54	470.406	1060.48	419.936	946.04		0.000474467	0.000472599	0.000474611	0.00047268	0.000474721	0.000472853	0.000474864	0.000472934		0.473716	0.00102618
53817	1457	19013	Iowa	Black Hawk County	-1717.05	-3878.21	-1532.01	-3458.82	469.406	1060.22	418.82	945.571		0.000473458	0.000472484	0.00047335	0.000472446	0.000473711	0.000472738	0.000473603	0.000472699		0.473061	0.000521535
54692	2332	19193	Iowa	Woodbury County	-1715.32	-3879.69	-1530.68	-3460.34	468.932	1060.63	418.455	945.983		0.000472982	0.000472665	0.000472939	0.000472653	0.000473233	0.000472917	0.00047319	0.000472905		0.472935	0.000210316
52923	563	17161	Illinois	Rock Island County	-1715.23	-3877.78	-1530.41	-3458.96	468.911	1060.11	418.385	945.612		0.000472958	0.000472431	0.000472857	0.000472465	0.000473212	0.000472685	0.000473111	0.000472719		0.472805	0.000283338
52885	525	22017	Louisiana	Caddo Parish	-1709.2	-3872.54	-1525.16	-3453.73	467.262	1058.68	416.95	944.185		0.000471294	0.000471793	0.000471234	0.00047175	0.000471548	0.000472049	0.000471488	0.000472006		0.471645	0.000305599
52886	526	26065	Michigan	Ingham County	-1705.54	-3860.18	-1522.35	-3443.37	466.263	1055.3	416.181	941.352		0.000470286	0.000470287	0.000470365	0.000470336	0.00047054	0.000470542	0.000470619	0.00047059		0.470446	0.000140356
52447	87	55087	Wisconsin	Outagamie County	-1705.64	-3846.06	-1522.11	-3430.29	466.288	1051.44	416.116	937.773		0.000470312	0.000468567	0.000470292	0.000468549	0.000470565	0.000468819	0.000470545	0.000468801		0.469556	0.000942237
52924	564	6093	California	Siskiyou County	-1700.41	-3848.95	-1516.14	-3431.01	464.859	1052.23	414.483	937.968		0.000468872	0.000468919	0.000468447	0.000468646	0.000469123	0.000469171	0.000468698	0.000468898		0.468847	0.000242518
53028	668	34025	New Jersey	Monmouth County	-1694.79	-3828.68	-1512.08	-3414.89	463.324	1046.69	413.375	933.568		0.00046732	0.00046645	0.000467192	0.000466445	0.000467574	0.000466704	0.000467446	0.000466699		0.466979	0.000455586
53122	762	26021	Michigan	Berrien County	-1687.31	-3819.54	-1504.89	-3405.83	461.279	1044.19	411.407	931.089		0.00046526	0.000465336	0.000464969	0.000465208	0.00046551	0.000465587	0.00046522	0.00046546		0.465319	0.000198669
53326	966	20177	Kansas	Shawnee County	-1689.91	-3808.34	-1508.12	-3396.48	461.986	1041.12	412.289	928.527		0.000465974	0.000463972	0.000465969	0.00046393	0.000466223	0.00046422	0.000466217	0.000464179		0.465085	0.0010883
53818	1458	18003	Indiana	Allen County	-1674.64	-3786.82	-1495.04	-3378.74	457.815	1035.24	408.714	923.682		0.000461765	0.000461349	0.000461926	0.000461507	0.000462014	0.000461599	0.000462175	0.000461757		0.461761	0.000273334
53986	1626	48039	Texas	Brazoria County	-1663.73	-3765.82	-1485.44	-3359.98	454.832	1029.5	406.092	918.555		0.000458756	0.000458791	0.000458962	0.000458944	0.000459004	0.00045904	0.00045921	0.000459193		0.458988	0.000164466
55293	2933	29183	Missouri	St. Charles County	-1664.48	-3760.95	-1485.56	-3355.28	455.038	1028.17	406.125	917.269		0.000458965	0.000458198	0.000459	0.000458304	0.000459211	0.000458445	0.000459246	0.000458551		0.45874	0.000414777
54866	2506	26145	Michigan	Saginaw County	-1658.1	-3760.93	-1479.27	-3354.26	453.294	1028.17	404.404	916.991		0.000457206	0.000458196	0.000457055	0.000458164	0.000457451	0.000458443	0.000457301	0.000458412		0.457779	0.000579661
54867	2507	55105	Wisconsin	Rock County	-1652.1	-3727.47	-1473.9	-3323.96	451.653	1019.02	402.934	908.705		0.000455551	0.000454119	0.000455394	0.000454025	0.000455795	0.000454364	0.000455639	0.000454269		0.454895	0.000763117
53446	1086	42079	Pennsylvania	Luzerne County	-1644.37	-3723.25	-1466.41	-3319.64	449.541	1017.87	400.89	907.528		0.000453419	0.000453605	0.000453082	0.000453434	0.000453665	0.000453852	0.000453327	0.000453681		0.453508	0.000241812
55158	2798	17143	Illinois	Peoria County	-1643.36	-3709.43	-1466.9	-3309.29	449.262	1014.08	401.023	904.696		0.000453139	0.000451921	0.000453234	0.000452022	0.000453382	0.000452164	0.000453478	0.000452266		0.452701	0.000664532
54321	1961	53025	Washington	Grant County	-1637.2	-3712.17	-1461.32	-3311.07	447.576	1014.83	399.493	905.175		0.000451442	0.000452255	0.000451508	0.000452264	0.000451681	0.000452496	0.000451747	0.000452505		0.451987	0.000439721
52582	222	34023	New Jersey	Middlesex County	-1638.52	-3697.97	-1462.52	-3299.12	447.943	1010.96	399.826	901.92		0.000451807	0.000450525	0.000451879	0.000450632	0.000452052	0.00045077	0.000452124	0.000450878		0.451333	0.000689948
52887	527	36063	New York	Niagara County	-1624.4	-3671.29	-1448.99	-3274.2	444.082	1003.66	396.126	895.105		0.000447913	0.000447274	0.000447699	0.000447228	0.000448155	0.000447517	0.00044794	0.00044747		0.44765	0.000333914
53219	859	39017	Ohio	Butler County	-1622.17	-3662.79	-1447.99	-3267.71	443.472	1001.34	395.854	893.331		0.000447298	0.000446239	0.000447391	0.000446342	0.00044754	0.000446481	0.000447632	0.000446584		0.446938	0.000580244
53327	967	24033	Maryland	Prince George's County	-1617.44	-3669.54	-1443.87	-3272.86	442.18	1003.18	394.729	894.739		0.000445994	0.000447061	0.000446118	0.000447045	0.000446235	0.000447305	0.00044636	0.000447288		0.446676	0.000550812
54868	2508	56033	Wyoming	Sheridan County	-1612.88	-3638.69	-1438.61	-3244.11	440.922	994.731	393.281	886.861		0.000444735	0.000443303	0.000444491	0.000443118	0.000444966	0.000443535	0.000444723	0.000443349		0.444027	0.000768558
54322	1962	49007	Utah	Carbon County	-1609.75	-3643.22	-1436.01	-3248.21	440.056	995.939	392.559	887.957		0.000443874	0.000443855	0.000443688	0.000443678	0.000444092	0.000444074	0.000443906	0.000443897		0.443883	0.000152071
53987	1627	6109	California	Tuolumne County	-1610.68	-3639.52	-1436.25	-3244.7	440.322	994.957	392.637	887.021		0.00044413	0.000443404	0.000443764	0.000443198	0.000444361	0.000443636	0.000443995	0.00044343		0.44374	0.000399261
55105	2745	48451	Texas	Tom Green County	-1594.47	-3606.06	-1422.74	-3216.27	435.897	985.827	388.949	879.266		0.000439659	0.000439328	0.000439589	0.000439315	0.000439895	0.000439565	0.000439825	0.000439552		0.439591	0.000206597
53328	968	55073	Wisconsin	Marathon County	-1593.26	-3589.75	-1421.68	-3201.48	435.565	981.367	388.659	875.22		0.000439325	0.000437341	0.000439261	0.000437295	0.00043956	0.000437576	0.000439497	0.00043753		0.438423	0.00106356
53988	1628	30063	Montana	Missoula County	-1585.75	-3592.85	-1415.4	-3205.05	433.51	982.209	386.942	876.194		0.000437253	0.000437718	0.000437322	0.000437783	0.000437486	0.000437952	0.000437554	0.000438017		0.437636	0.00027966
53329	969	32031	Nevada	Washoe County	-1585.16	-3583.54	-1414.44	-3196.02	433.016	978.914	386.381	873.054		0.000437091	0.000436584	0.000437023	0.000436549	0.000436988	0.000436482	0.00043692	0.000436447		0.436761	0.000269055
53330	970	29099	Missouri	Jefferson County	-1576.48	-3564.2	-1406.89	-3179.29	430.98	974.384	384.616	869.156		0.000434699	0.000434228	0.000434691	0.000434264	0.000434933	0.000434463	0.000434925	0.000434499		0.434588	0.000270845
52654	294	48245	Texas	Jefferson County	-1573.24	-3565.82	-1403.72	-3179.78	430.095	974.83	383.75	869.292		0.000433806	0.000434426	0.000433711	0.000434331	0.00043404	0.000434662	0.000433945	0.000434567		0.434186	0.000358387
54578	2218	19155	Iowa	Pottawattamie County	-1574.07	-3559.3	-1404.28	-3174.15	430.319	973.039	383.9	867.745		0.000434035	0.000433631	0.000433884	0.000433562	0.000434266	0.000433863	0.000434115	0.000433793		0.433894	0.000238416
52448	88	55101	Wisconsin	Racine County	-1574.46	-3555.28	-1405.1	-3170.87	430.428	971.945	384.127	866.855		0.000434143	0.000433142	0.000434138	0.000433115	0.000434376	0.000433375	0.000434371	0.000433348		0.433751	0.000555236
54760	2400	37119	North Carolina	Mecklenburg County	-1560.31	-3527.89	-1393.55	-3147.56	426.561	964.461	380.971	860.485		0.000430241	0.000429804	0.00043057	0.00042993	0.000430474	0.000430038	0.000430803	0.000430164		0.430253	0.000340378
53568	1208	22103	Louisiana	St. Tammany Parish	-1555.11	-3524.73	-1387.53	-3143.6	425.138	963.596	379.326	859.404		0.000428805	0.000429419	0.00042871	0.00042939	0.000429037	0.000429653	0.000428942	0.000429623		0.429197	0.000369804
52730	370	16083	Idaho	Twin Falls County	-1549.8	-3511.36	-1382.82	-3131.63	423.679	959.922	378.031	856.112		0.000427343	0.000427791	0.000427256	0.000427754	0.000427565	0.000428014	0.000427479	0.000427978		0.427647	0.000282038
55294	2934	27163	Minnesota	Washington County	-1546.48	-3482.32	-1380.42	-3106.43	422.775	951.994	377.379	849.236		0.000426425	0.000424252	0.000426513	0.000424313	0.000426653	0.000424479	0.000426741	0.00042454		0.42549	0.00117593
54869	2509	53035	Washington	Kitsap County	-1542.95	-3481.38	-1376.57	-3104.59	421.813	951.743	376.327	848.735		0.000425454	0.000424138	0.000425323	0.000424061	0.000425682	0.000424367	0.000425551	0.00042429		0.424858	0.000701812
54870	2510	44007	Rhode Island	Providence County	-1537.04	-3473.16	-1371.37	-3097.58	420.199	949.497	374.909	846.823		0.000423824	0.000423136	0.000423718	0.000423104	0.000424054	0.000423366	0.000423948	0.000423334		0.42356	0.000371271
53331	971	48485	Texas	Wichita County	-1534.35	-3477.39	-1368.97	-3101.05	419.462	950.651	374.25	847.767		0.000423082	0.000423652	0.000422975	0.000423578	0.000423309	0.000423881	0.000423202	0.000423806		0.423436	0.000340074
53332	972	30049	Montana	Lewis and Clark County	-1533.15	-3475.51	-1367.82	-3099.63	419.13	950.129	373.932	847.371		0.000422751	0.000423423	0.00042262	0.000423383	0.000422974	0.000423648	0.000422843	0.000423608		0.423156	0.000405624
53123	763	12057	Florida	Hillsborough County	-1524.3	-3457.75	-1360.47	-3084.39	416.716	945.287	371.927	843.217		0.00042031	0.000421259	0.000420348	0.000421302	0.000420538	0.000421489	0.000420576	0.000421531		0.420919	0.000523851
52655	295	48381	Texas	Randall County	-1527.67	-3445.39	-1363.73	-3073.56	417.634	941.9	372.817	840.249		0.00042124	0.000419754	0.000421357	0.000419823	0.000421465	0.000419978	0.000421582	0.000420048		0.420656	0.000817853
54871	2511	30093	Montana	Silver Bow County	-1508.56	-3417.35	-1345.33	-3046.84	412.406	934.227	367.782	832.937		0.00041597	0.000416338	0.00041567	0.000416173	0.000416189	0.000416557	0.000415889	0.000416392		0.416147	0.000290982
54872	2512	39093	Ohio	Lorain County	-1509.82	-3408.42	-1347.13	-3040.34	412.755	931.797	368.281	831.172		0.000416317	0.000415249	0.000416228	0.000415285	0.000416541	0.000415474	0.000416453	0.00041551		0.415882	0.000551696
53545	1185	1089	Alabama	Madison County	-1485.4	-3364.34	-1325.76	-3001.04	406.08	919.749	362.437	820.428		0.000409583	0.000409879	0.000409623	0.000409916	0.000409805	0.000410102	0.000409845	0.000410139		0.409861	0.000198506
54638	2278	26161	Michigan	Washtenaw County	-1479.38	-3344.14	-1320.86	-2983.62	404.434	914.223	361.097	815.664		0.000407924	0.000407418	0.000408109	0.000407537	0.000408144	0.000407638	0.000408329	0.000407758		0.407857	0.000322105
53927	1567	8085	Colorado	Montrose County	-1476.57	-3333.68	-1316.88	-2972.35	403.656	911.339	359.999	812.563		0.00040715	0.000406143	0.000406879	0.000405998	0.000407358	0.000406352	0.000407087	0.000406207		0.406647	0.000529386
54157	1797	49001	Utah	Beaver County	-1459.22	-3291.67	-1301.66	-2934.62	398.889	899.8	355.819	802.199		0.000402366	0.000401025	0.000402179	0.000400844	0.000402548	0.000401207	0.000402361	0.000401026		0.401694	0.000728325
55295	2935	37183	North Carolina	Wake County	-1454.79	-3282.88	-1299.29	-2929.43	397.712	897.479	355.203	800.854		0.000401142	0.000399954	0.000401447	0.000400136	0.00040136	0.000400172	0.000401664	0.000400354		0.400779	0.000690947
54693	2333	41045	Oregon	Malheur County	-1448.99	-3271.46	-1292.51	-2916.77	396.118	894.338	353.34	797.374		0.000399544	0.000398564	0.00039935	0.000398407	0.000399751	0.000398771	0.000399558	0.000398614		0.39907	0.000534292
52731	371	55131	Wisconsin	Washington County	-1449.32	-3266.62	-1293.15	-2913.54	396.216	893.029	353.522	796.504		0.000399635	0.000397973	0.000399549	0.000397964	0.00039985	0.000398188	0.000399763	0.000398179		0.398888	0.000875771
54873	2513	53071	Washington	Walla Walla County	-1445.02	-3267.18	-1289.03	-2913.36	395.037	893.175	352.391	796.448		0.000398451	0.000398042	0.000398275	0.00039794	0.000398661	0.000398253	0.000398485	0.000398151		0.398282	0.000240585
54158	1798	42071	Pennsylvania	Lancaster County	-1443.35	-3258.92	-1287.65	-2906.26	394.584	890.928	352.02	794.518		0.000397988	0.000397035	0.000397849	0.000396971	0.000398203	0.000397251	0.000398064	0.000397187		0.397568	0.000506017
52656	296	48329	Texas	Midland County	-1439.68	-3248.75	-1285.06	-2897.66	393.579	888.145	351.309	792.163		0.000396976	0.000395797	0.000397048	0.000395796	0.000397189	0.00039601	0.000397261	0.000396009		0.396511	0.000660214
52925	565	25009	Massachusetts	Essex County	-1435	-3245.37	-1280.24	-2894.4	392.304	887.225	349.994	791.276		0.000395688	0.000395385	0.00039556	0.000395351	0.000395902	0.0003956	0.000395774	0.000395566		0.395603	0.000185379
53029	669	5143	Arkansas	Washington County	-1434.12	-3242.5	-1280.78	-2893.32	392.06	886.435	350.14	790.978		0.000395443	0.000395035	0.000395726	0.000395203	0.000395656	0.000395248	0.000395939	0.000395417		0.395458	0.00030065
53220	860	41011	Oregon	Coos County	-1428.71	-3234.2	-1273.94	-2883.98	390.581	884.169	348.27	788.424		0.000393951	0.000394024	0.000393613	0.000393928	0.000394163	0.000394237	0.000393825	0.00039414		0.393985	0.00020315
53647	1287	6027	California	Inyo County	-1417.26	-3193.49	-1263.85	-2846.91	387.423	872.975	345.487	778.234		0.000390795	0.000389065	0.000390496	0.000388865	0.000390977	0.000389246	0.000390678	0.000389046		0.389896	0.000914038
53989	1629	48367	Texas	Parker County	-1406.17	-3178.29	-1254.84	-2835.12	384.421	868.884	343.05	775.068		0.000387738	0.000387213	0.000387713	0.000387254	0.000387947	0.000387422	0.000387922	0.000387463		0.387584	0.000286461
54377	2017	22019	Louisiana	Calcasieu Parish	-1402.28	-3185.7	-1251.4	-2841.22	383.357	870.91	342.11	776.736		0.000386664	0.000388115	0.000386649	0.000388086	0.000386873	0.000388325	0.000386858	0.000388297		0.387484	0.000780289
54694	2334	34013	New Jersey	Essex County	-1396.56	-3169.99	-1246.63	-2827.73	381.795	866.618	340.807	773.05		0.000385088	0.000386201	0.000385177	0.000386244	0.000385297	0.000386411	0.000385385	0.000386454		0.385782	0.000594783
54874	2514	17179	Illinois	Tazewell County	-1392.67	-3146.96	-1242.55	-2806.96	380.729	860.318	339.69	767.367		0.000384015	0.000383396	0.000383916	0.000383407	0.000384221	0.000383602	0.000384122	0.000383613		0.383786	0.000323079
55350	2990	41043	Oregon	Linn County	-1393.02	-3144.87	-1242.52	-2804.14	380.825	859.745	339.679	766.595		0.000384112	0.000383141	0.000383904	0.000383022	0.000384318	0.000383347	0.00038411	0.000383228		0.383648	0.000515608
54695	2335	25013	Massachusetts	Hampden County	-1389.69	-3147.68	-1239.76	-2807.24	379.917	860.519	338.928	767.448		0.000383194	0.000383483	0.000383053	0.000383445	0.000383402	0.000383692	0.000383261	0.000383654		0.383398	0.000220657
54226	1866	17099	Illinois	La Salle County	-1388.69	-3142.94	-1238.74	-2802.92	379.641	859.218	338.647	766.263		0.000382917	0.000382905	0.000382737	0.000382855	0.000383123	0.000383112	0.000382943	0.000383062		0.382957	0.000133943
55159	2799	27145	Minnesota	Stearns County	-1387.01	-3133.11	-1238.26	-2795.12	379.181	856.527	338.516	764.128		0.000382455	0.000381708	0.00038259	0.00038179	0.000382659	0.000381912	0.000382794	0.000381994		0.382238	0.000431759
52732	372	49051	Utah	Wasatch County	-1384.88	-3130.46	-1236.7	-2792.63	378.58	855.766	338.073	763.415		0.000381866	0.000381385	0.000382106	0.00038145	0.000382053	0.000381573	0.000382294	0.000381638		0.381796	0.000333391
54464	2104	49043	Utah	Summit County	-1371.47	-3116.26	-1225.51	-2781.27	374.921	851.895	335.02	760.318		0.000378169	0.000379655	0.000378651	0.000379898	0.000378359	0.000379847	0.000378841	0.00038009		0.379189	0.000765486
53124	764	39099	Ohio	Mahoning County	-1373.07	-3104.95	-1224.57	-2768.39	375.372	848.836	334.774	756.827		0.000378611	0.000378278	0.000378359	0.000378139	0.000378815	0.000378483	0.000378563	0.000378344		0.378449	0.00021344
53819	1459	42045	Pennsylvania	Delaware County	-1372.09	-3100.1	-1224.08	-2764.52	375.104	847.51	334.641	755.768		0.000378339	0.000377686	0.000378208	0.00037761	0.000378544	0.000377892	0.000378413	0.000377815		0.378063	0.000356433
55160	2800	26075	Michigan	Jackson County	-1370.23	-3101.12	-1222.39	-2766.06	374.595	847.787	334.178	756.189		0.000377827	0.000377811	0.000377686	0.000377821	0.000378031	0.000378015	0.000377889	0.000378025		0.377888	0.000125728
55161	2801	29510	Missouri	St. Louis city	-1363.25	-3108.45	-1216.7	-2772.44	372.687	849.79	332.621	757.932		0.000375903	0.000378704	0.000375926	0.000378692	0.000376106	0.000378908	0.000376129	0.000378897		0.377408	0.00149213
54579	2219	48423	Texas	Smith County	-1364.56	-3095.24	-1217.79	-2760.9	373.046	846.181	332.919	754.777		0.000376265	0.000377095	0.000376263	0.000377115	0.000376468	0.000377299	0.000376466	0.00037732		0.376786	0.00046288
53125	765	12071	Florida	Lee County	-1360.81	-3086.34	-1213.78	-2752.19	372.02	843.752	331.825	752.401		0.000375229	0.000376011	0.000375025	0.000375926	0.000375433	0.000376216	0.000375229	0.000376132		0.37565	0.000470731
53990	1630	55117	Wisconsin	Sheboygan County	-1352.42	-3054.48	-1206.42	-2724.19	369.725	835.036	329.812	744.739		0.000372916	0.000372129	0.000372752	0.000372101	0.000373116	0.00037233	0.000372952	0.000372302		0.372574	0.00040349
54696	2336	32005	Nevada	Douglas County	-1347.63	-3046.51	-1202.08	-2716.93	368.412	832.846	328.621	742.747		0.000371596	0.000371157	0.00037141	0.00037111	0.000371791	0.000371353	0.000371606	0.000371306		0.371416	0.000234846
55351	2991	32007	Nevada	Elko County	-1343.88	-3048.34	-1200.06	-2719.83	367.384	833.341	328.068	743.533		0.000370562	0.000371381	0.000370788	0.000371506	0.000370754	0.000371574	0.00037098	0.000371699		0.371155	0.000434904
53333	973	55063	Wisconsin	La Crosse County	-1341.94	-3023.33	-1197.24	-2695.85	366.859	826.517	327.302	736.991		0.000370026	0.000368333	0.000369916	0.00036823	0.000370224	0.000368531	0.000370114	0.000368428		0.369225	0.000910918
52733	373	12009	Florida	Brevard County	-1339.38	-3027.97	-1194.63	-2700.04	366.163	827.794	326.591	738.143		0.000369321	0.000368899	0.000369109	0.000368803	0.000369522	0.000369101	0.00036931	0.000369004		0.369134	0.00023905
52366	6	53007	Washington	Chelan County	-1336.23	-3016.44	-1192.04	-2689.75	365.298	824.633	325.878	735.322		0.000368453	0.000367494	0.000368307	0.000367398	0.000368649	0.000367691	0.000368503	0.000367594		0.368011	0.000514326
54227	1867	49023	Utah	Juab County	-1327.73	-2998.05	-1184.87	-2673.47	362.956	819.559	323.903	730.832		0.000366109	0.000365253	0.000366095	0.000365174	0.000366285	0.000365429	0.00036627	0.000365349		0.365746	0.000484926
52926	566	34027	New Jersey	Morris County	-1322.37	-2977.29	-1179.79	-2655.17	361.512	813.936	322.533	725.874		0.00036463	0.000362724	0.000364523	0.000362673	0.000364827	0.000362921	0.000364721	0.000362871		0.363736	0.00101037
52734	374	40017	Oklahoma	Canadian County	-1318.09	-2976.04	-1176.72	-2655.19	360.339	813.589	321.691	725.877		0.000363449	0.000362572	0.000363574	0.000362677	0.000363644	0.000362767	0.000363769	0.000362872		0.363166	0.000489456
54228	1868	8043	Colorado	Fremont County	-1309.83	-2970.9	-1168.09	-2648.77	358.077	812.174	319.329	724.11		0.000361173	0.000361946	0.00036091	0.000361799	0.000361361	0.000362136	0.000361098	0.000361989		0.361552	0.000470068
54323	1963	56041	Wyoming	Uinta County	-1303.96	-2943.24	-1164.04	-2625.15	356.467	804.598	318.216	717.641		0.000359555	0.000358576	0.000359657	0.000358573	0.000359736	0.000358758	0.000359839	0.000358755		0.359181	0.000561059
54324	1964	10003	Delaware	New Castle County	-1287.71	-2916.65	-1149.22	-2601.62	352.037	797.359	314.176	711.234		0.000355073	0.000355337	0.000355079	0.000355359	0.000355265	0.00035553	0.000355271	0.000355552		0.355308	0.000178587
54875	2515	12031	Florida	Duval County	-1279.8	-2899.3	-1142.32	-2585.86	349.874	792.618	312.289	706.928		0.000352892	0.000353223	0.000352945	0.000353207	0.000353083	0.000353416	0.000353137	0.000353399		0.353163	0.000190229
54103	1743	53047	Washington	Okanogan County	-1279.18	-2896.52	-1141	-2582.7	349.7	791.847	311.927	706.055		0.00035272	0.000352884	0.00035254	0.000352775	0.000352908	0.000353072	0.000352727	0.000352963		0.352824	0.000166884
54876	2516	27111	Minnesota	Otter Tail County	-1281.84	-2889.04	-1143.16	-2575.9	350.427	789.804	312.515	704.197		0.000353453	0.000351973	0.000353204	0.000351846	0.000353641	0.000352162	0.000353392	0.000352034		0.352713	0.000772391
55352	2992	29019	Missouri	Boone County	-1274.93	-2887.49	-1138.44	-2576.01	348.542	789.381	311.228	704.231		0.00035155	0.000351783	0.000351749	0.000351862	0.000351738	0.000351973	0.000351938	0.000352051		0.35183	0.000159159
53991	1631	18127	Indiana	Porter County	-1273.2	-2874.49	-1136.23	-2564.28	348.069	785.831	310.625	701.025		0.000351073	0.000350201	0.000351066	0.000350259	0.000351261	0.00035039	0.000351255	0.000350449		0.350744	0.000460369
52367	7	48251	Texas	Johnson County	-1263.89	-2855.52	-1128.1	-2547.42	345.524	780.645	308.402	696.416		0.000348506	0.000347889	0.000348554	0.000347957	0.000348694	0.000348077	0.000348742	0.000348144		0.34832	0.000340985
53126	766	39085	Ohio	Lake County	-1255.73	-2830.65	-1120.03	-2524.05	343.294	773.846	306.194	690.029		0.000346256	0.000344859	0.000346058	0.000344764	0.000346442	0.000345046	0.000346245	0.000344951		0.345578	0.000730639
53221	861	34005	New Jersey	Burlington County	-1253.11	-2828.69	-1117.95	-2522.82	342.578	773.312	305.626	689.693		0.000345532	0.00034462	0.000345415	0.000344596	0.00034572	0.000344808	0.000345603	0.000344784		0.345135	0.000475557
53334	974	6103	California	Tehama County	-1250.55	-2829.06	-1115.57	-2522.62	341.875	773.406	304.974	689.63		0.000344827	0.000344666	0.000344682	0.000344568	0.00034501	0.00034485	0.000344865	0.000344752		0.344777	0.000139223
53820	1460	16055	Idaho	Kootenai County	-1250.54	-2823.71	-1115.89	-2518.64	341.872	771.948	305.061	688.546		0.000344823	0.000344014	0.000344779	0.000344024	0.000345008	0.0003442	0.000344964	0.00034421		0.344503	0.000429644
53992	1632	17019	Illinois	Champaign County	-1247.17	-2824.12	-1113.69	-2520.11	340.951	772.059	304.462	688.949		0.000343894	0.000344063	0.000344101	0.000344226	0.000344079	0.000344249	0.000344286	0.000344412		0.344164	0.000161217
54378	2018	26025	Michigan	Calhoun County	-1244.26	-2817.03	-1110.03	-2512.64	340.157	770.121	303.46	686.907		0.000343092	0.000343199	0.000342969	0.000343205	0.000343277	0.000343385	0.000343154	0.000343391		0.343209	0.000142886
54580	2220	55039	Wisconsin	Fond du Lac County	-1242.5	-2799.45	-1108.28	-2496.01	339.675	765.314	302.983	682.361		0.000342607	0.000341058	0.00034243	0.000340935	0.000342791	0.000341242	0.000342614	0.000341118		0.341849	0.000823604
52521	161	56005	Wyoming	Campbell County	-1226.39	-2787.32	-1096.12	-2487.56	335.267	761.988	299.653	680.042		0.000338165	0.00033958	0.000338671	0.00033978	0.000338342	0.000339758	0.000338848	0.000339959		0.339138	0.000711894
52888	528	25023	Massachusetts	Plymouth County	-1229.09	-2780.88	-1096.52	-2480.52	336.01	760.242	299.768	678.13		0.000338908	0.000338796	0.000338795	0.000338819	0.000339092	0.00033898	0.000338979	0.000339003		0.338921	0.00011013
54697	2337	39155	Ohio	Trumbull County	-1228.1	-2774.08	-1095.43	-2473.74	335.74	758.383	299.469	676.275		0.000338637	0.000337968	0.000338457	0.000337893	0.00033882	0.000338151	0.00033864	0.000338076		0.33833	0.000351624
52735	375	6057	California	Nevada County	-1224.36	-2765.92	-1091.93	-2466.09	334.712	756.143	298.51	674.176		0.000337604	0.000336974	0.000337378	0.000336848	0.000337782	0.000337152	0.000337556	0.000337026		0.33729	0.000338793
54229	1869	42029	Pennsylvania	Chester County	-1222.33	-2751.06	-1090.67	-2453.35	334.162	752.089	298.17	670.702		0.000337044	0.000335163	0.000336989	0.000335107	0.000337227	0.000335345	0.000337172	0.00033529		0.336167	0.001011
55296	2936	29097	Missouri	Jasper County	-1210.42	-2741.97	-1080.08	-2445.72	330.904	749.6	295.271	668.612		0.00033376	0.000334055	0.000333715	0.000334065	0.000333939	0.000334235	0.000333894	0.000334245		0.333988	0.000198373
55106	2746	27109	Minnesota	Olmsted County	-1211.95	-2732.63	-1081.83	-2437.66	331.323	747.045	295.75	666.406		0.000334184	0.000332917	0.000334257	0.000332963	0.000334362	0.000333096	0.000334435	0.000333142		0.333669	0.000691525
54465	2105	19061	Iowa	Dubuque County	-1210.18	-2737.09	-1079.62	-2440.94	330.839	748.265	295.146	667.306		0.000333695	0.00033346	0.000333573	0.000333413	0.000333874	0.00033364	0.000333751	0.000333592		0.333625	0.000150767
53447	1087	17113	Illinois	McLean County	-1207.79	-2726.38	-1078.66	-2433.04	330.186	745.34	294.884	665.147		0.000333035	0.000332156	0.000333276	0.000332333	0.000333214	0.000332335	0.000333456	0.000332512		0.33279	0.000509129
52522	162	13121	Georgia	Fulton County	-1196.62	-2716.96	-1068.3	-2423.8	327.133	742.768	292.054	662.621		0.000329955	0.000331009	0.000330077	0.00033107	0.000330134	0.000331189	0.000330256	0.00033125		0.330617	0.000558162
53448	1088	42125	Pennsylvania	Washington County	-1199.64	-2711.45	-1069.89	-2417.84	327.958	741.26	292.489	660.992		0.000330788	0.000330337	0.000330569	0.000330256	0.000330966	0.000330516	0.000330747	0.000330436		0.330577	0.000241796
53335	975	40031	Oklahoma	Comanche County	-1192.71	-2690.88	-1064.7	-2400.43	326.064	735.633	291.067	656.23		0.000328878	0.00032783	0.000328963	0.000327878	0.000329054	0.000328007	0.000329139	0.000328055		0.328476	0.000578608
53821	1461	34007	New Jersey	Camden County	-1188.97	-2696.57	-1060.93	-2405.28	325.042	737.193	290.04	657.559		0.000327846	0.000328524	0.0003278	0.000328541	0.000328024	0.000328703	0.000327978	0.00032872		0.328267	0.000391742
54230	1870	25021	Massachusetts	Norfolk County	-1190.5	-2687.42	-1062.15	-2396.87	325.46	734.693	290.372	655.26		0.000328267	0.00032741	0.000328175	0.000327392	0.000328445	0.000327588	0.000328353	0.00032757		0.3279	0.000449935
54877	2517	4012	Arizona	La Paz County	-1189.86	-2686.35	-1061.21	-2395.48	325.256	734.332	290.09	654.822		0.000328092	0.000327279	0.000327886	0.000327203	0.00032824	0.000327427	0.000328034	0.000327351		0.327689	0.000415789
53449	1089	6101	California	Sutter County	-1187.06	-2680	-1059.22	-2390.12	324.515	732.653	289.568	653.408		0.000327319	0.000326506	0.000327271	0.000326471	0.000327492	0.000326679	0.000327444	0.000326644		0.326978	0.000441529
55135	2775	17115	Illinois	Macon County	-1187.09	-2678.1	-1058.98	-2388.51	324.527	732.142	289.505	652.971		0.000327328	0.000326274	0.000327197	0.00032625	0.000327504	0.000326451	0.000327373	0.000326426		0.32685	0.000545213
52368	8	55059	Wisconsin	Kenosha County	-1176.39	-2659.53	-1049.73	-2371.66	321.602	727.063	286.976	648.364		0.000324377	0.000324011	0.000324339	0.000323948	0.000324551	0.000324186	0.000324513	0.000324123		0.324256	0.000224247
52449	89	42133	Pennsylvania	York County	-1172.92	-2652.03	-1046.49	-2365.25	320.656	725.017	286.09	646.617		0.000323421	0.000323098	0.000323336	0.000323073	0.000323597	0.000323274	0.000323511	0.000323249		0.32332	0.000185495
52657	297	55027	Wisconsin	Dodge County	-1171.39	-2644.99	-1044.94	-2358.78	320.236	723.087	285.665	644.843		0.000323	0.00032224	0.000322857	0.000322189	0.000323173	0.000322413	0.00032303	0.000322363		0.322658	0.000397002
52736	376	20155	Kansas	Reno County	-1170.06	-2640.72	-1043.7	-2354.62	319.872	721.919	285.327	643.704		0.000322633	0.00032172	0.000322476	0.000321621	0.000322806	0.000321893	0.000322648	0.000321793		0.322199	0.000486592
52927	567	12033	Florida	Escambia County	-1166.27	-2645.27	-1040.52	-2358.86	318.839	723.169	284.46	644.87		0.000321589	0.000322274	0.000321493	0.0003222	0.000321763	0.00032245	0.000321668	0.000322376		0.321977	0.000386752
53127	767	35035	New Mexico	Otero County	-1166.27	-2638.91	-1040.5	-2353.4	318.835	721.423	284.449	643.369		0.000321588	0.0003215	0.000321485	0.000321454	0.000321759	0.000321671	0.000321656	0.000321626		0.321592	0.000105756
53569	1209	36065	New York	Oneida County	-1167.18	-2636.99	-1041.12	-2351.47	319.084	720.904	284.622	642.848		0.000321837	0.000321265	0.000321677	0.00032119	0.000322011	0.00032144	0.000321851	0.000321365		0.32158	0.000304952
53733	1373	30067	Montana	Park County	-1159.61	-2621.54	-1034.62	-2338.31	317.009	716.664	282.839	639.236		0.000319751	0.000319383	0.000319669	0.000319393	0.000319917	0.000319549	0.000319835	0.000319559		0.319632	0.000196124
54651	2291	45045	South Carolina	Greenville County	-1154.74	-2613.83	-1030.55	-2331.53	315.683	714.572	281.734	637.398		0.000318407	0.000318444	0.000318413	0.000318467	0.000318579	0.000318617	0.000318585	0.000318641		0.318519	9.60259e-05
54878	2518	55141	Wisconsin	Wood County	-1155.38	-2612.4	-1030.69	-2330.16	315.859	714.179	281.77	637.02		0.000318585	0.00031827	0.000318456	0.00031828	0.000318756	0.000318441	0.000318626	0.000318452		0.318483	0.00016703
55297	2937	12127	Florida	Volusia County	-1154.26	-2612.88	-1029.47	-2329.96	315.555	714.316	281.438	636.97		0.000318277	0.000318328	0.000318078	0.000318253	0.00031845	0.000318502	0.000318251	0.000318427		0.318321	0.000136797
54879	2519	24003	Maryland	Anne Arundel County	-1152.78	-2606.17	-1028.74	-2324.51	315.148	712.481	281.24	635.479		0.000317866	0.000317511	0.000317855	0.000317509	0.000318039	0.000317684	0.000318027	0.000317681		0.317771	0.000208784
53822	1462	38035	North Dakota	Grand Forks County	-1147.3	-2614	-1024.2	-2332.21	313.647	714.612	279.996	637.577		0.000316356	0.000318464	0.000316452	0.00031856	0.000316524	0.000318634	0.00031662	0.00031873		0.317543	0.00113224
53336	976	31153	Nebraska	Sarpy County	-1149.46	-2583.62	-1026.64	-2305.41	314.239	706.309	280.663	630.252		0.000316952	0.000314764	0.000317205	0.0003149	0.000317121	0.000314932	0.000317374	0.000315068		0.31604	0.0012093
55353	2993	25005	Massachusetts	Bristol County	-1142.27	-2586.04	-1019.14	-2306.56	312.276	706.976	278.614	630.572		0.00031497	0.000315058	0.000314886	0.000315057	0.00031514	0.00031523	0.000315057	0.000315228		0.315078	0.000118999
53522	1162	37081	North Carolina	Guilford County	-1133.18	-2567.46	-1011.38	-2290.16	309.79	701.897	276.492	626.089		0.000312463	0.000312795	0.000312489	0.000312817	0.000312632	0.000312965	0.000312658	0.000312987		0.312726	0.000199037
52889	529	31157	Nebraska	Scotts Bluff County	-1135.3	-2561	-1012.56	-2283.34	310.365	700.119	276.81	624.211		0.000313048	0.000312008	0.000312853	0.000311884	0.000313212	0.000312172	0.000313017	0.000312049		0.312531	0.000550928
54581	2221	11001	DC	District of Columbia	-1123.78	-2567.62	-1003.19	-2290.34	307.22	701.94	274.254	626.138		0.00030987	0.000312814	0.000309959	0.000312842	0.000310038	0.000312984	0.000310126	0.000313012		0.311456	0.00156089
52737	377	42069	Pennsylvania	Lackawanna County	-1127.71	-2551.3	-1005.68	-2274.73	308.294	697.48	274.936	621.868		0.000310953	0.000310826	0.000310729	0.000310708	0.000311122	0.000310995	0.000310898	0.000310877		0.310889	0.000137281
53823	1463	54039	West Virginia	Kanawha County	-1121.8	-2538.45	-1000.71	-2263.96	306.68	693.965	273.576	618.924		0.000309325	0.000309261	0.000309194	0.000309237	0.000309492	0.000309428	0.000309361	0.000309405		0.309338	0.000102917
54104	1744	36001	New York	Albany County	-1122.5	-2529.73	-1001.44	-2255.65	306.871	691.581	273.776	616.654		0.000309518	0.000308197	0.000309419	0.000308103	0.000309686	0.000308365	0.000309587	0.000308271		0.308893	0.0007123
54231	1871	53015	Washington	Cowlitz County	-1116.75	-2521.86	-995.967	-2248.36	305.298	689.426	272.278	614.657		0.000307933	0.000307239	0.000307727	0.000307107	0.000308098	0.000307404	0.000307892	0.000307272		0.307584	0.000373857
54582	2222	38089	North Dakota	Stark County	-1111.07	-2520.97	-991.243	-2248.62	303.743	689.177	270.984	614.722		0.000306368	0.000307131	0.000306268	0.000307142	0.000306529	0.000307294	0.000306429	0.000307305		0.306808	0.000448047
54880	2520	24510	Maryland	Baltimore city	-1107.6	-2526.47	-988.414	-2253.19	302.797	690.69	270.215	615.982		0.000305409	0.0003078	0.000305394	0.000307767	0.000305575	0.000307968	0.000305559	0.000307935		0.306676	0.00127719
53450	1090	47149	Tennessee	Rutherford County	-1104.95	-2500.92	-986.925	-2232.11	302.072	683.705	269.807	610.218		0.000304678	0.000304688	0.000304934	0.000304888	0.000304842	0.000304853	0.000305098	0.000305053		0.304879	0.000151524
54881	2521	42011	Pennsylvania	Berks County	-1103.28	-2494.21	-984.296	-2224.25	301.617	681.873	269.088	608.068		0.000304218	0.000303871	0.000304121	0.000303813	0.000304383	0.000304036	0.000304286	0.000303978		0.304088	0.000200527
53337	977	48181	Texas	Grayson County	-1099.2	-2487.98	-980.608	-2218.82	300.501	680.166	268.079	606.582		0.000303094	0.000303112	0.000302982	0.000303072	0.000303257	0.000303276	0.000303145	0.000303236		0.303146	0.000102447
54698	2338	6033	California	Lake County	-1099.25	-2483.68	-980.27	-2214.18	300.511	678.984	267.985	605.309		0.000303107	0.000302587	0.000302877	0.000302438	0.000303267	0.000302749	0.000303038	0.000302599		0.302833	0.000289285
54761	2401	26147	Michigan	St. Clair County	-1096.89	-2477.94	-978.581	-2210.04	299.87	677.42	267.525	604.184		0.000302457	0.000301888	0.000302355	0.000301873	0.00030262	0.000302051	0.000302518	0.000302037		0.302225	0.000296639
55162	2802	18163	Indiana	Vanderburgh County	-1093.19	-2475.88	-975.388	-2208.29	298.856	676.86	266.653	603.705		0.000301435	0.000301638	0.000301369	0.000301634	0.000301597	0.000301801	0.000301531	0.000301798		0.3016	0.000154768
55420	3060	21067	Kentucky	Fayette County	-1088.65	-2469.38	-972.173	-2203.83	297.617	675.081	265.774	602.485		0.000300184	0.000300845	0.000300375	0.000301024	0.000300346	0.000301008	0.000300538	0.000301187		0.300689	0.00037425
54466	2106	26093	Michigan	Livingston County	-1082.6	-2443.47	-965.993	-2179.52	295.962	667.997	264.084	595.84		0.000298516	0.000297689	0.000298466	0.000297705	0.000298677	0.000297849	0.000298627	0.000297865		0.298174	0.000433733
52738	378	55035	Wisconsin	Eau Claire County	-1080.35	-2443.04	-964.039	-2178.83	295.345	667.879	263.549	595.649		0.000297895	0.000297637	0.000297862	0.00029761	0.000298054	0.000297797	0.000298022	0.00029777		0.297831	0.000161355
54762	2402	34031	New Jersey	Passaic County	-1078.9	-2437.9	-963.006	-2174.63	294.953	666.477	263.268	594.506		0.000297497	0.00029701	0.000297543	0.000297037	0.000297658	0.000297172	0.000297704	0.000297199		0.297352	0.000279755
52890	530	12095	Florida	Orange County	-1073.97	-2439.69	-959.125	-2176.82	293.606	666.968	262.208	595.104		0.000296138	0.000297228	0.000296344	0.000297335	0.000296299	0.000297391	0.000296505	0.000297498		0.296842	0.000570316
53824	1464	35005	New Mexico	Chaves County	-1068.07	-2422.09	-952.93	-2160.06	291.988	662.148	260.511	590.515		0.000294509	0.000295084	0.00029443	0.000295046	0.000294666	0.000295242	0.000294587	0.000295203		0.294846	0.000330958
54105	1745	18039	Indiana	Elkhart County	-1064.69	-2400.84	-950.562	-2142.17	291.066	656.345	259.865	585.629		0.000293578	0.000292496	0.000293698	0.000292603	0.000293736	0.000292654	0.000293856	0.000292761		0.293173	0.000591088
53928	1568	48091	Texas	Comal County	-1052.54	-2383.45	-939.18	-2126.18	287.745	651.588	256.754	581.256		0.000290228	0.000290376	0.000290181	0.000290418	0.000290384	0.000290533	0.000290338	0.000290575		0.290379	0.000134739
54583	2223	46013	South Dakota	Brown County	-1052.49	-2380.12	-939.214	-2123.26	287.728	650.675	256.761	580.452		0.000290213	0.000289972	0.000290192	0.000290019	0.000290367	0.000290126	0.000290346	0.000290173		0.290176	0.000139327
55107	2747	39165	Ohio	Warren County	-1054.47	-2370.91	-941.079	-2114.67	288.271	648.162	257.273	578.111		0.000290759	0.000288849	0.000290768	0.000288846	0.000290916	0.000289005	0.000290925	0.000289003		0.289884	0.00102771
55421	3061	5051	Arkansas	Garland County	-1049.03	-2370.94	-935.811	-2114.37	286.785	648.169	255.833	578.028		0.00028926	0.000288852	0.000289141	0.000288805	0.000289416	0.000289009	0.000289297	0.000288961		0.289092	0.000220832
52891	531	26005	Michigan	Allegan County	-1049.58	-2367.31	-936.445	-2111.26	286.936	647.176	256.006	577.179		0.000289412	0.00028841	0.000289337	0.000288381	0.000289568	0.000288566	0.000289492	0.000288537		0.288963	0.000530632
53338	978	31079	Nebraska	Hall County	-1047.8	-2364.16	-934.918	-2108.36	286.446	646.311	255.587	576.381		0.00028892	0.000288026	0.000288865	0.000287984	0.000289073	0.00028818	0.000289019	0.000288138		0.288525	0.000482012
53648	1288	46093	South Dakota	Meade County	-1045.8	-2366.13	-933.324	-2110.61	285.9	646.847	255.15	576.992		0.00028837	0.000288267	0.000288372	0.000288291	0.000288522	0.000288419	0.000288524	0.000288443		0.288401	9.55599e-05
53523	1163	42077	Pennsylvania	Lehigh County	-1040.74	-2354.54	-928.514	-2099.85	284.52	643.689	253.839	574.06		0.000286974	0.000286855	0.000286886	0.000286822	0.000287129	0.000287011	0.000287041	0.000286978		0.286962	0.000102854
55163	2803	5131	Arkansas	Sebastian County	-1030.5	-2342.25	-919.645	-2089.25	281.718	640.327	251.413	571.16		0.000284149	0.000285358	0.000284146	0.000285373	0.000284301	0.000285512	0.000284299	0.000285528		0.284833	0.000656769
52450	90	22055	Louisiana	Lafayette Parish	-1030.2	-2332.62	-919.905	-2081.14	281.639	637.695	251.485	568.946		0.000284068	0.000284184	0.000284226	0.000284267	0.000284222	0.000284338	0.00028438	0.000284421		0.284263	0.000114384
52739	379	36085	New York	Richmond County	-1030.34	-2328.14	-919.346	-2076.43	281.675	636.472	251.332	567.659		0.000284105	0.000283639	0.000284053	0.000283623	0.000284259	0.000283793	0.000284207	0.000283778		0.283932	0.000254114
52928	568	34039	New Jersey	Union County	-1027.05	-2318.85	-916.517	-2068.13	280.777	633.931	250.559	565.391		0.000283199	0.000282506	0.000283179	0.00028249	0.000283353	0.00028266	0.000283333	0.000282644		0.28292	0.000378609
53030	670	17091	Illinois	Kankakee County	-1025.88	-2320.25	-915.291	-2069.41	280.457	634.313	250.223	565.737		0.000282877	0.000282677	0.0002828	0.000282664	0.000283029	0.00028283	0.000282953	0.000282817		0.282831	0.000124558
53128	768	4005	Arizona	Coconino County	-1017.11	-2326.2	-908.246	-2075.13	277.764	635.263	248.033	566.697		0.000280459	0.000283402	0.000280624	0.000283445	0.000280312	0.000283254	0.000280476	0.000283297		0.281909	0.00154372
53339	979	29037	Missouri	Cass County	-1013.72	-2290.32	-904.604	-2042.79	277.132	626.128	247.301	558.458		0.000279524	0.000279031	0.000279498	0.000279028	0.000279674	0.000279181	0.000279648	0.000279178		0.279345	0.00026972
53524	1164	28049	Mississippi	Hinds County	-1010.32	-2296.58	-902.167	-2048.93	276.204	627.842	246.636	560.141		0.000278587	0.000279793	0.000278746	0.000279867	0.000278738	0.000279945	0.000278897	0.000280019		0.279324	0.000631198
53734	1374	1003	Alabama	Baldwin County	-1009.1	-2282.36	-900.329	-2035.58	275.87	623.956	246.134	556.49		0.00027825	0.000278061	0.000278178	0.000278042	0.000278401	0.000278212	0.000278329	0.000278194		0.278208	0.000121696
53825	1465	19103	Iowa	Johnson County	-1009.07	-2272.8	-901.428	-2028.52	275.859	621.338	246.433	554.557		0.00027824	0.000276896	0.000278517	0.000277079	0.000278389	0.000277045	0.000278666	0.000277228		0.277758	0.000758319
54092	1732	45019	South Carolina	Charleston County	-1004.45	-2275.95	-896.33	-2029.95	274.6	622.203	245.041	554.953		0.000276968	0.000277279	0.000276942	0.000277275	0.000277119	0.00027743	0.000277092	0.000277426		0.277191	0.000190426
54379	2019	4023	Arizona	Santa Cruz County	-1004.36	-2271.44	-896.57	-2026.26	274.565	620.948	245.097	553.924		0.000276943	0.00027673	0.000277016	0.000276771	0.000277083	0.000276871	0.000277157	0.000276911		0.276935	0.000147065
54763	2403	29021	Missouri	Buchanan County	-999.582	-2264.27	-891.911	-2019.67	273.265	619.004	243.83	552.136		0.000275625	0.000275856	0.000275577	0.000275869	0.000275772	0.000276004	0.000275724	0.000276017		0.275805	0.000162109
55164	2804	55135	Wisconsin	Waupaca County	-1001.63	-2260.29	-893.126	-2015.2	273.827	617.918	244.163	550.916		0.000276191	0.000275372	0.000275952	0.000275259	0.000276339	0.00027552	0.0002761	0.000275407		0.275768	0.000423515
54090	1730	16027	Idaho	Canyon County	-1000.61	-2259.21	-893.323	-2015.56	273.545	617.621	244.216	551.013		0.000275907	0.000275241	0.000276013	0.000275309	0.000276054	0.000275388	0.00027616	0.000275456		0.275691	0.000377415
54882	2522	8029	Colorado	Delta County	-997.92	-2260.37	-890.075	-2016.21	272.805	617.925	243.323	551.18		0.000275166	0.000275381	0.000275009	0.000275398	0.000275308	0.000275523	0.000275151	0.00027554		0.27531	0.000188046
53340	980	55127	Wisconsin	Walworth County	-994.36	-2247.42	-887.146	-2004.32	271.839	614.402	242.528	547.942		0.000274185	0.000273804	0.000274104	0.000273773	0.000274332	0.000273952	0.000274251	0.000273921		0.27404	0.000208244
53826	1466	30081	Montana	Ravalli County	-993.092	-2247.58	-885.817	-2004.42	271.49	614.44	242.163	547.966		0.000273835	0.000273823	0.000273694	0.000273787	0.00027398	0.000273969	0.000273839	0.000273933		0.273858	9.77373e-05
53929	1569	51810	Virginia	Virginia Beach city	-990.39	-2237.47	-884.176	-1996.23	270.755	611.684	241.718	545.734		0.00027309	0.000272592	0.000273187	0.000272668	0.000273238	0.000272741	0.000273335	0.000272817		0.272959	0.000286719
54467	2107	36007	New York	Broome County	-989.75	-2235.88	-882.772	-1993.82	270.579	611.249	241.334	545.074		0.000272914	0.000272398	0.000272753	0.000272339	0.000273061	0.000272546	0.000272901	0.000272487		0.272675	0.00026843
54764	2404	47187	Tennessee	Williamson County	-990.918	-2230.46	-884.933	-1990.89	270.899	609.767	241.924	544.271		0.000273236	0.000271738	0.000273421	0.000271938	0.000273383	0.000271886	0.000273568	0.000272086		0.272657	0.000806994
54232	1872	49013	Utah	Duchesne County	-985.816	-2224.5	-879.746	-1983.63	269.493	608.114	240.497	542.268		0.000271829	0.000271012	0.000271818	0.000270948	0.000271965	0.000271149	0.000271955	0.000271084		0.27147	0.000457439
53649	1289	26103	Michigan	Marquette County	-981.497	-2218.99	-875.425	-1978.57	268.322	606.628	239.324	540.903		0.000270638	0.00027034	0.000270483	0.000270256	0.000270783	0.000270486	0.000270628	0.000270402		0.270502	0.000173384
53930	1570	56001	Wyoming	Albany County	-975.428	-2227.67	-870.927	-1987.07	266.659	608.99	238.091	543.218		0.000268964	0.000271397	0.000269093	0.000271417	0.000269104	0.000271539	0.000269233	0.000271559		0.270289	0.00127502
53341	981	47165	Tennessee	Sumner County	-977.618	-2211.84	-872.509	-1973.27	267.263	604.676	238.528	539.456		0.000269568	0.000269469	0.000269582	0.000269532	0.000269714	0.000269616	0.000269728	0.000269679		0.269611	9.07859e-05
52929	569	55071	Wisconsin	Manitowoc County	-977.937	-2210.17	-872.402	-1971.39	267.349	604.218	238.498	538.94		0.000269656	0.000269266	0.000269549	0.000269276	0.000269801	0.000269411	0.000269694	0.000269421		0.269509	0.000197635
53031	671	42095	Pennsylvania	Northampton County	-974.857	-2198.53	-869.682	-1960.72	266.508	601.039	237.755	536.026		0.000268807	0.000267848	0.000268708	0.000267819	0.000268953	0.000267994	0.000268854	0.000267964		0.268368	0.000501675
53129	769	48265	Texas	Kerr County	-967.457	-2185.89	-862.63	-1948.75	264.484	597.582	235.827	532.752		0.000266767	0.000266308	0.00026653	0.000266183	0.00026691	0.000266452	0.000266673	0.000266327		0.266519	0.000249836
53570	1210	30027	Montana	Fergus County	-966.216	-2183.34	-861.752	-1946.98	264.141	596.874	235.583	532.258		0.000266424	0.000265997	0.000266258	0.000265941	0.000266564	0.000266137	0.000266398	0.00026608		0.266225	0.000222578
53650	1290	22079	Louisiana	Rapides Parish	-957.444	-2169.95	-854.418	-1935.32	261.748	593.224	233.582	529.08		0.000264006	0.000264366	0.000263992	0.000264348	0.000264148	0.00026451	0.000264135	0.000264492		0.26425	0.000206517
53827	1467	26055	Michigan	Grand Traverse County	-958.282	-2164.76	-854.896	-1930.93	261.976	591.804	233.712	527.879		0.000264237	0.000263734	0.00026414	0.000263749	0.000264379	0.000263876	0.000264282	0.000263891		0.264036	0.000253431
53993	1633	56039	Wyoming	Teton County	-957.115	-2162.7	-855.238	-1930.17	261.651	591.225	233.8	527.658		0.000263915	0.000263482	0.000264246	0.000263645	0.000264051	0.000263618	0.000264382	0.000263781		0.26389	0.000317828
54325	1965	39025	Ohio	Clermont County	-957.111	-2162.32	-854.126	-1928.64	261.656	591.139	233.502	527.255		0.000263914	0.000263437	0.000263902	0.000263436	0.000264056	0.00026358	0.000264045	0.000263579		0.263744	0.0002632
54883	2523	31111	Nebraska	Lincoln County	-955.806	-2157	-852.69	-1923.49	261.297	589.677	233.107	525.84		0.000263554	0.000262788	0.000263458	0.000262732	0.000263693	0.000262928	0.000263598	0.000262872		0.263203	0.000407701
52892	532	53041	Washington	Lewis County	-953.066	-2153.07	-850.054	-1920.05	260.55	588.608	232.388	524.904		0.000262798	0.00026231	0.000262644	0.000262263	0.000262939	0.000262451	0.000262785	0.000262404		0.262574	0.000251789
54884	2524	42007	Pennsylvania	Beaver County	-952.242	-2151	-849.193	-1917.84	260.325	588.044	232.154	524.302		0.000262571	0.000262057	0.000262378	0.000261961	0.000262713	0.0002622	0.00026252	0.000262103		0.262313	0.000272566
54233	1873	12105	Florida	Polk County	-946.079	-2144.21	-844.184	-1912.62	258.641	586.188	230.785	522.876		0.000260872	0.000261229	0.00026083	0.000261247	0.000261014	0.000261372	0.000260972	0.00026139		0.261116	0.000221419
53451	1091	33011	New Hampshire	Hillsborough County	-946.503	-2138.64	-844.544	-1907.69	258.757	584.664	230.883	521.527		0.000260989	0.000260551	0.000260941	0.000260574	0.00026113	0.000260692	0.000261083	0.000260716		0.260835	0.00022884
54234	1874	36027	New York	Dutchess County	-946.926	-2135.59	-844.848	-1904.48	258.872	583.832	230.966	520.65		0.000261105	0.00026018	0.000261036	0.000260136	0.000261247	0.000260321	0.000261177	0.000260278		0.260685	0.000494537
52740	380	36071	New York	Orange County	-940.04	-2129.84	-839.048	-1900.11	256.99	582.259	229.381	519.457		0.000259207	0.000259479	0.000259243	0.00025954	0.000259347	0.00025962	0.000259384	0.000259681		0.259438	0.000171908
54123	1763	38059	North Dakota	Morton County	-939.794	-2129.44	-838.674	-1899.73	256.919	582.142	229.275	519.344		0.000259139	0.00025943	0.000259128	0.000259487	0.000259276	0.000259568	0.000259265	0.000259625		0.259365	0.000190112
54159	1799	38105	North Dakota	Williams County	-936.033	-2122.37	-835.347	-1893.47	255.891	580.209	228.366	517.633		0.000258102	0.000258569	0.0002581	0.000258632	0.000258238	0.000258706	0.000258236	0.000258769		0.258419	0.000278213
54326	1966	37021	North Carolina	Buncombe County	-937.393	-2119.9	-836.196	-1890.32	256.266	579.54	228.601	516.778		0.000258477	0.000258268	0.000258362	0.000258202	0.000258617	0.000258408	0.000258502	0.000258342		0.258397	0.000133517
54160	1800	37067	North Carolina	Forsyth County	-937.203	-2118.45	-836.266	-1889.28	256.214	579.146	228.62	516.494		0.000258424	0.000258092	0.000258384	0.00025806	0.000258564	0.000258232	0.000258524	0.0002582		0.25831	0.000191698
53525	1165	42019	Pennsylvania	Butler County	-931.207	-2105.43	-830.6	-1877.55	254.575	575.585	227.07	513.287		0.000256771	0.000256505	0.000256633	0.000256458	0.00025691	0.000256644	0.000256772	0.000256597		0.256661	0.000149797
53130	770	18091	Indiana	La Porte County	-929.911	-2104.69	-829.698	-1877.26	254.22	575.381	226.824	513.207		0.000256414	0.000256415	0.000256355	0.000256418	0.000256552	0.000256554	0.000256493	0.000256556		0.256469	7.91735e-05
53828	1468	26045	Michigan	Eaton County	-929.753	-2099.27	-829.508	-1872.25	254.177	573.902	226.772	511.838		0.00025637	0.000255755	0.000256296	0.000255734	0.000256508	0.000255894	0.000256434	0.000255872		0.256108	0.000324332
53994	1634	30041	Montana	Hill County	-927.009	-2103.9	-827.147	-1876.38	253.423	575.16	226.123	512.96		0.000255613	0.000256319	0.000255566	0.000256298	0.000255748	0.000256455	0.000255701	0.000256433		0.256017	0.000391644
54584	2224	27061	Minnesota	Itasca County	-929.729	-2095.73	-829.073	-1868.43	254.169	572.93	226.651	510.791		0.000256363	0.000255324	0.000256161	0.000255212	0.0002565	0.000255461	0.000256298	0.000255349		0.255834	0.000543512
53131	771	45051	South Carolina	Horry County	-924.773	-2100.16	-825.006	-1872.96	252.816	574.146	225.542	512.033		0.000254997	0.000255864	0.000254905	0.00025583	0.000255135	0.000256003	0.000255043	0.00025597		0.255468	0.000486359
52583	223	22073	Louisiana	Ouachita Parish	-924.864	-2090.15	-825.554	-1864.39	252.841	571.407	225.691	509.69		0.000255022	0.000254643	0.000255074	0.00025466	0.00025516	0.000254782	0.000255212	0.000254798		0.254919	0.000225219
52369	9	36013	New York	Chautauqua County	-926.141	-2086.54	-825.963	-1860.14	253.19	570.422	225.803	508.527		0.000255374	0.000254204	0.0002552	0.000254079	0.000255512	0.000254342	0.000255338	0.000254217		0.254783	0.000621982
54885	2525	45083	South Carolina	Spartanburg County	-922.723	-2088.13	-823.354	-1862.32	252.256	570.857	225.09	509.124		0.000254432	0.000254398	0.000254394	0.000254377	0.000254569	0.000254536	0.000254532	0.000254516		0.254469	7.66788e-05
52930	570	17001	Illinois	Adams County	-923.552	-2084.96	-823.806	-1859.39	252.481	569.986	225.212	508.32		0.00025466	0.000254011	0.000254534	0.000253977	0.000254797	0.000254148	0.000254671	0.000254114		0.254364	0.000334171
54380	2020	16065	Idaho	Madison County	-912.759	-2099.6	-816.558	-1874.68	249.525	573.975	223.226	512.49		0.000251684	0.000255795	0.000252295	0.000256066	0.000251813	0.000255927	0.000252424	0.000256198		0.254025	0.00212349
53829	1469	28033	Mississippi	DeSoto County	-918.827	-2078.58	-820.43	-1854.49	251.19	568.244	224.29	506.982		0.000253357	0.000253234	0.000253491	0.000253307	0.000253494	0.000253371	0.000253628	0.000253445		0.253416	0.000124127
55165	2805	55089	Wisconsin	Ozaukee County	-920.208	-2074.93	-820.854	-1850.25	251.567	567.246	224.406	505.823		0.000253738	0.00025279	0.000253622	0.000252729	0.000253874	0.000252926	0.000253758	0.000252865		0.253288	0.000500045
53526	1166	34001	New Jersey	Atlantic County	-914.251	-2071.39	-815.609	-1847.17	249.94	566.281	222.973	504.982		0.000252095	0.000252358	0.000252001	0.000252308	0.000252232	0.000252496	0.000252138	0.000252445		0.252259	0.000173765
54699	2339	13067	Georgia	Cobb County	-914.633	-2066.48	-816.857	-1844.04	250.044	564.937	223.314	504.128		0.000252201	0.00025176	0.000252387	0.000251881	0.000252337	0.000251896	0.000252524	0.000252018		0.252125	0.000276489
54652	2292	41041	Oregon	Lincoln County	-910.168	-2052.32	-811.552	-1829.56	248.822	561.065	221.863	500.167		0.00025097	0.000250035	0.000250748	0.000249903	0.000251104	0.00025017	0.000250883	0.000250038		0.250481	0.000490753
53571	1211	36091	New York	Saratoga County	-909.552	-2051.47	-811.488	-1829.6	248.655	560.834	221.846	500.179		0.0002508	0.000249931	0.000250728	0.000249908	0.000250936	0.000250067	0.000250864	0.000250044		0.25041	0.000457999
52658	298	40131	Oklahoma	Rogers County	-907.66	-2054.78	-809.961	-1832.8	248.136	561.737	221.427	501.052		0.000250278	0.000250335	0.000250256	0.000250346	0.000250412	0.00025047	0.00025039	0.00025048		0.250371	8.2348e-05
55166	2806	48139	Texas	Ellis County	-904.197	-2045.93	-807.112	-1825.26	247.19	559.319	220.649	498.992		0.000249323	0.000249257	0.000249376	0.000249316	0.000249458	0.000249392	0.00024951	0.00024945		0.249385	8.48617e-05
52741	381	31119	Nebraska	Madison County	-904.717	-2042.37	-807.086	-1821.17	247.331	558.341	220.641	497.871		0.000249467	0.000248823	0.000249368	0.000248757	0.000249599	0.000248956	0.000249501	0.00024889		0.24917	0.000345645
53222	862	48209	Texas	Hays County	-904.071	-2039.74	-807.544	-1820.33	247.156	557.626	220.767	497.643		0.000249288	0.000248502	0.00024951	0.000248641	0.000249423	0.000248637	0.000249644	0.000248776		0.249053	0.000458648
53995	1635	6009	California	Calaveras County	-900.555	-2029.9	-803.1	-1809.69	246.19	554.925	219.549	494.725		0.000248319	0.000247303	0.000248137	0.000247188	0.000248448	0.000247433	0.000248266	0.000247317		0.247801	0.000535835
52742	382	18057	Indiana	Hamilton County	-900.18	-2027.28	-804.223	-1809.71	246.092	554.221	219.859	494.74		0.000248216	0.000246985	0.000248484	0.000247191	0.000248349	0.000247119	0.000248617	0.000247325		0.247786	0.000690146
54235	1875	56003	Wyoming	Big Horn County	-896.521	-2020.92	-799.544	-1801.61	245.087	552.47	218.576	492.517		0.000247207	0.000246209	0.000247038	0.000246085	0.000247335	0.000246338	0.000247166	0.000246213		0.246699	0.000531651
52743	383	20209	Kansas	Wyandotte County	-891.206	-2020.7	-795.499	-1802.21	243.638	552.417	217.473	492.686		0.000245741	0.000246182	0.000245788	0.000246166	0.000245872	0.000246314	0.000245919	0.000246298		0.246035	0.000230982
52744	384	26017	Michigan	Bay County	-893.196	-2015.38	-796.783	-1797.24	244.182	550.965	217.825	491.33		0.00024629	0.000245534	0.000246185	0.000245487	0.000246422	0.000245667	0.000246317	0.00024562		0.24594	0.000397057
53223	863	48041	Texas	Brazos County	-888.705	-2018.81	-793.866	-1801.48	242.955	551.905	217.028	492.49		0.000245051	0.000245953	0.000245283	0.000246067	0.000245184	0.000246086	0.000245415	0.0002462		0.245655	0.00046642
54161	1801	16051	Idaho	Jefferson County	-890.033	-2008.5	-794.958	-1792.33	243.312	549.072	217.321	489.975		0.000245418	0.000244696	0.000245621	0.000244817	0.000245544	0.000244823	0.000245747	0.000244943		0.245201	0.000422755
54124	1764	53021	Washington	Franklin County	-889.659	-2005.7	-795.055	-1790.09	243.213	548.313	217.351	489.372		0.000245314	0.000244355	0.000245651	0.000244512	0.000245444	0.000244484	0.000245781	0.000244641		0.245023	0.000582302
54765	2405	18157	Indiana	Tippecanoe County	-887.218	-2010.19	-792.271	-1793.69	242.548	549.547	216.592	490.361		0.000244641	0.000244902	0.000244791	0.000245003	0.000244773	0.000245034	0.000244923	0.000245136		0.2449	0.000160237
53572	1212	28047	Mississippi	Harrison County	-878.642	-1994.82	-784.228	-1779.25	240.205	545.349	214.394	486.414		0.000242277	0.00024303	0.000242306	0.00024303	0.000242408	0.000243163	0.000242437	0.000243163		0.242727	0.000401704
55255	2895	30009	Montana	Carbon County	-880.334	-1990.59	-785.259	-1775.35	240.662	544.179	214.671	485.337		0.000242743	0.000242515	0.000242624	0.000242498	0.000242869	0.000242641	0.00024275	0.000242624		0.242658	0.000124858
54162	1802	19169	Iowa	Story County	-874.746	-1986.22	-781.155	-1772.33	239.138	542.991	213.552	484.52		0.000241202	0.000241981	0.000241356	0.000242086	0.000241331	0.000242111	0.000241485	0.000242216		0.241721	0.000415345
54163	1803	26115	Michigan	Monroe County	-874.814	-1980.77	-780.429	-1766.44	239.157	541.505	213.354	482.912		0.000241221	0.000241318	0.000241132	0.000241281	0.000241351	0.000241449	0.000241262	0.000241412		0.241303	0.000102698
52370	10	42043	Pennsylvania	Dauphin County	-873.041	-1974.95	-778.933	-1761.41	238.674	539.916	212.946	481.537		0.000240732	0.000240609	0.00024067	0.000240594	0.000240863	0.00024074	0.0002408	0.000240724		0.240716	9.10618e-05
52745	385	48221	Texas	Hood County	-873.738	-1972.27	-779.113	-1758.22	238.863	539.181	212.995	480.663		0.000240924	0.000240282	0.000240725	0.000240158	0.000241054	0.000240412	0.000240855	0.000240288		0.240587	0.000342303
53132	772	51041	Virginia	Chesterfield County	-869.829	-1963.45	-776.435	-1751.64	237.795	536.77	212.263	478.867		0.000239847	0.000239207	0.000239898	0.000239259	0.000239977	0.000239338	0.000240028	0.00023939		0.239618	0.000349488
53224	864	25025	Massachusetts	Suffolk County	-864.829	-1962.23	-772.093	-1750.7	236.429	536.438	211.076	478.608		0.000238468	0.000239059	0.000238556	0.00023913	0.000238597	0.000239189	0.000238685	0.00023926		0.238868	0.000322204
54236	1876	12115	Florida	Sarasota County	-863.553	-1952.39	-769.952	-1740.75	236.08	533.749	210.491	475.89		0.000238116	0.000237861	0.000237895	0.000237772	0.000238245	0.00023799	0.000238024	0.000237902		0.237976	0.000152014
54468	2108	39023	Ohio	Clark County	-861.137	-1947.62	-768.125	-1736.84	235.418	532.442	209.991	474.819		0.00023745	0.000237279	0.00023733	0.000237237	0.000237578	0.000237408	0.000237458	0.000237366		0.237388	0.000109172
54653	2293	13135	Georgia	Gwinnett County	-859.998	-1947.09	-768.647	-1738.23	235.108	532.299	210.134	475.199		0.000237136	0.000237215	0.000237491	0.000237427	0.000237264	0.000237344	0.00023762	0.000237556		0.237382	0.000171056
54886	2526	4009	Arizona	Graham County	-859.719	-1946.28	-767.337	-1735.84	235.024	532.061	209.769	474.531		0.000237059	0.000237116	0.000237087	0.000237101	0.00023718	0.000237238	0.000237208	0.000237222		0.237151	6.85947e-05
53996	1636	1101	Alabama	Montgomery County	-853.642	-1935.62	-761.831	-1726.4	233.37	529.163	208.271	471.968		0.000235383	0.000235817	0.000235386	0.000235812	0.000235511	0.000235945	0.000235513	0.000235941		0.235663	0.000240141
55243	2883	23005	Maine	Cumberland County	-854.25	-1933.7	-762.16	-1725.15	233.536	528.638	208.361	471.624		0.000235551	0.000235583	0.000235487	0.000235641	0.000235678	0.000235711	0.000235615	0.000235769		0.23563	9.06101e-05
54093	1733	42021	Pennsylvania	Cambria County	-852.073	-1928.83	-759.896	-1720.12	232.941	527.307	207.742	470.249		0.000234951	0.00023499	0.000234788	0.000234954	0.000235078	0.000235118	0.000234915	0.000235082		0.234984	0.000108067
54585	2225	41015	Oregon	Curry County	-854.232	-1924.42	-761.427	-1715.21	233.531	526.098	208.159	468.906		0.000235546	0.000234452	0.000235261	0.000234284	0.000235672	0.000234579	0.000235387	0.00023441		0.234949	0.000571417
54654	2294	12083	Florida	Marion County	-850.251	-1922.87	-758.221	-1714.53	232.444	525.677	207.284	468.722		0.000234448	0.000234264	0.00023427	0.00023419	0.000234576	0.000234391	0.000234397	0.000234318		0.234357	0.000122195
54766	2406	18167	Indiana	Vigo County	-849.855	-1920.78	-758.26	-1713.13	232.334	525.105	207.294	468.336		0.000234339	0.000234009	0.000234282	0.000233999	0.000234465	0.000234136	0.000234408	0.000234125		0.234221	0.000178479
54655	2295	18081	Indiana	Johnson County	-847.795	-1916.56	-756.578	-1709.62	231.771	523.95	206.834	467.377		0.000233771	0.000233495	0.000233762	0.00023352	0.000233897	0.000233621	0.000233888	0.000233646		0.2337	0.000154533
55167	2807	55111	Wisconsin	Sauk County	-844.278	-1907.31	-753.231	-1700.9	230.809	521.42	205.918	464.992		0.000232801	0.000232368	0.000232728	0.000232329	0.000232926	0.000232493	0.000232853	0.000232454		0.232619	0.000234467
52584	224	42041	Pennsylvania	Cumberland County	-844.673	-1905.24	-753.518	-1699.05	230.918	520.856	205.998	464.49		0.00023291	0.000232116	0.000232817	0.000232076	0.000233036	0.000232242	0.000232943	0.000232202		0.232543	0.000417542
53225	865	6069	California	San Benito County	-841.297	-1900.5	-751.24	-1695.42	229.988	519.544	205.369	463.482		0.000231979	0.000231538	0.000232113	0.00023158	0.000232097	0.000231656	0.000232231	0.000231698		0.231862	0.000273036
53997	1637	35015	New Mexico	Eddy County	-836.572	-1898.78	-746.329	-1693.31	228.701	519.088	204.031	462.915		0.000230676	0.00023133	0.000230596	0.000231291	0.000230799	0.000231453	0.000230719	0.000231415		0.231035	0.000368231
53133	773	19187	Iowa	Webster County	-838.278	-1892.77	-747.651	-1687.67	229.168	517.445	204.392	461.375		0.000231147	0.000230597	0.000231004	0.000230522	0.00023127	0.000230721	0.000231127	0.000230645		0.230879	0.000289863
53735	1375	39103	Ohio	Medina County	-837.584	-1890.52	-747.45	-1686.58	228.98	516.832	204.339	461.081		0.000230955	0.000230322	0.000230942	0.000230373	0.00023108	0.000230447	0.000231067	0.000230498		0.230711	0.000328523
52451	91	20045	Kansas	Douglas County	-834.762	-1886.69	-745.19	-1682.95	228.207	515.784	203.72	460.085		0.000230177	0.000229857	0.000230244	0.000229877	0.0002303	0.00022998	0.000230367	0.00023		0.2301	0.000196799
54887	2527	12101	Florida	Pasco County	-833.236	-1889.3	-743.218	-1684.98	227.792	516.502	203.183	460.645		0.000229756	0.000230175	0.000229635	0.000230155	0.000229881	0.0002303	0.000229759	0.00023028		0.229993	0.00026393
52371	11	12021	Florida	Collier County	-832.188	-1881.12	-742.219	-1677.32	227.505	514.265	202.909	458.55		0.000229467	0.000229177	0.000229326	0.000229108	0.000229592	0.000229303	0.00022945	0.000229233		0.229332	0.000162449
53573	1213	9011	Connecticut	New London County	-831.754	-1880.75	-742.162	-1677.7	227.386	514.164	202.894	458.652		0.000229348	0.000229133	0.000229308	0.000229159	0.000229472	0.000229258	0.000229433	0.000229284		0.229299	0.000119121
53651	1291	41061	Oregon	Union County	-832.996	-1878.68	-742.926	-1674.9	227.722	513.589	203.099	457.879		0.00022969	0.000228881	0.000229544	0.000228777	0.000229811	0.000229001	0.000229665	0.000228898		0.229283	0.00043161
55354	2994	29071	Missouri	Franklin County	-830.932	-1881.95	-741.43	-1678.84	227.161	514.489	202.692	458.963		0.000229121	0.000229279	0.000229082	0.000229316	0.000229244	0.000229403	0.000229205	0.00022944		0.229261	0.00012552
53652	1292	18095	Indiana	Madison County	-830.47	-1882.87	-740.848	-1679.2	227.035	514.741	202.534	459.061		0.000228994	0.000229391	0.000228902	0.000229364	0.000229117	0.000229515	0.000229026	0.000229488		0.229225	0.000241706
55136	2776	47163	Tennessee	Sullivan County	-830.334	-1881.31	-740.581	-1677.72	226.998	514.316	202.461	458.657		0.000228956	0.000229201	0.00022882	0.000229162	0.00022908	0.000229325	0.000228944	0.000229287		0.229097	0.000178778
52372	12	17195	Illinois	Whiteside County	-830.025	-1877.68	-740.398	-1674.61	226.913	513.322	202.41	457.805		0.000228871	0.000228759	0.000228763	0.000228737	0.000228994	0.000228882	0.000228886	0.00022886		0.228844	8.608e-05
53736	1376	19033	Iowa	Cerro Gordo County	-829.055	-1870.71	-739.384	-1668.01	226.647	511.413	202.133	455.999		0.000228604	0.000227909	0.00022845	0.000227836	0.000228726	0.000228031	0.000228572	0.000227958		0.228261	0.000361578
54469	2109	51161	Virginia	Roanoke County	-826.864	-1866.99	-737.586	-1664.87	226.05	510.401	201.643	455.146		0.000228	0.000227456	0.000227894	0.000227408	0.000228123	0.00022758	0.000228018	0.000227531		0.227751	0.00028639
53931	1571	53045	Washington	Mason County	-822.928	-1860.63	-733.956	-1659.06	224.973	508.661	200.649	453.556		0.000226914	0.000226682	0.000226773	0.000226614	0.000227036	0.000226804	0.000226895	0.000226737		0.226807	0.0001366
54237	1877	42051	Pennsylvania	Fayette County	-817.678	-1850.47	-729.296	-1650.29	223.538	505.884	199.376	451.158		0.000225467	0.000225443	0.000225333	0.000225416	0.000225588	0.000225566	0.000225455	0.000225538		0.225476	8.47062e-05
52931	571	18063	Indiana	Hendricks County	-818.261	-1842.91	-730.567	-1644.48	223.697	503.818	199.723	449.57		0.000225627	0.000224523	0.000225726	0.000224622	0.000225749	0.000224644	0.000225847	0.000224744		0.225185	0.000596006
53342	982	48187	Texas	Guadalupe County	-816.438	-1846.64	-728.873	-1647.56	223.199	504.837	199.26	450.411		0.000225125	0.000224977	0.000225202	0.000225043	0.000225246	0.000225099	0.000225324	0.000225165		0.225147	0.000111347
53830	1470	34017	New Jersey	Hudson County	-816.144	-1840.49	-728.901	-1642.4	223.119	503.156	199.268	449.001		0.000225044	0.000224227	0.000225211	0.000224337	0.000225166	0.00022435	0.000225333	0.00022446		0.224766	0.000462491
54074	1714	35061	New Mexico	Valencia County	-811.115	-1844.26	-723.783	-1644.95	221.74	504.178	197.866	449.692		0.000223657	0.000224687	0.00022363	0.000224686	0.000223774	0.000224805	0.000223747	0.000224805		0.224224	0.000561636
54125	1765	39089	Ohio	Licking County	-812.85	-1835.99	-725.254	-1637.51	222.218	501.925	198.271	447.664		0.000224135	0.000223679	0.000224084	0.00022367	0.000224256	0.000223801	0.000224205	0.000223791		0.223953	0.000242078
54470	2110	55097	Wisconsin	Portage County	-811.693	-1836.22	-724.318	-1637.82	221.901	501.985	198.014	447.748		0.000223816	0.000223707	0.000223795	0.000223713	0.000223936	0.000223827	0.000223915	0.000223833		0.223818	8.24758e-05
52659	299	10005	Delaware	Sussex County	-810.66	-1831.83	-723.082	-1633.58	221.62	500.79	197.678	446.591		0.000223531	0.000223173	0.000223413	0.000223133	0.000223653	0.000223295	0.000223534	0.000223255		0.223373	0.000188339
54537	2177	5045	Arkansas	Faulkner County	-803.277	-1825.03	-717.233	-1628.33	219.601	498.928	196.078	445.155		0.000221495	0.000222344	0.000221606	0.000222416	0.000221615	0.000222464	0.000221725	0.000222537		0.222025	0.000451022
53737	1377	48257	Texas	Kaufman County	-804.181	-1820.74	-717.732	-1624.39	219.848	497.755	196.214	444.079		0.000221745	0.000221821	0.00022176	0.000221879	0.000221864	0.000221941	0.00022188	0.000221999		0.221861	8.56324e-05
54767	2407	41071	Oregon	Yamhill County	-804.964	-1818.33	-718.095	-1621.52	220.061	497.096	196.313	443.292		0.000221961	0.000221528	0.000221872	0.000221486	0.00022208	0.000221647	0.000221991	0.000221605		0.221771	0.000230954
53452	1092	30017	Montana	Custer County	-803.624	-1817.54	-716.737	-1620.64	219.692	496.873	195.939	443.045		0.000221591	0.000221431	0.000221453	0.000221366	0.000221707	0.000221548	0.000221569	0.000221482		0.221518	0.000107571
55256	2896	51153	Virginia	Prince William County	-800.45	-1810.43	-715.418	-1616.23	218.828	494.939	195.582	441.848		0.000220716	0.000220566	0.000221045	0.000220764	0.000220836	0.000220686	0.000221165	0.000220884		0.220833	0.000196149
53574	1214	48469	Texas	Victoria County	-798.306	-1810.01	-712.364	-1614.6	218.242	494.823	194.747	441.401		0.000220125	0.000220515	0.000220101	0.000220541	0.000220244	0.000220634	0.00022022	0.00022066		0.22038	0.000231039
54656	2296	34021	New Jersey	Mercer County	-795.746	-1798.76	-710.213	-1604.48	217.543	491.748	194.159	438.637		0.000219419	0.000219144	0.000219437	0.000219159	0.000219538	0.000219263	0.000219556	0.000219278		0.219349	0.000161172
54586	2226	17183	Illinois	Vermilion County	-793.306	-1794.02	-707.656	-1599.92	216.875	490.451	193.46	437.387		0.000218746	0.000218566	0.000218647	0.000218536	0.000218864	0.000218684	0.000218765	0.000218654		0.218683	0.00010752
52452	92	34015	New Jersey	Gloucester County	-788.723	-1784.66	-703.592	-1591.55	215.623	487.894	192.349	435.102		0.000217482	0.000217426	0.000217391	0.000217393	0.0002176	0.000217544	0.000217509	0.000217511		0.217482	7.44232e-05
52893	533	27171	Minnesota	Wright County	-789.074	-1778.56	-704.574	-1586.77	215.717	486.221	192.616	433.791		0.000217579	0.000216682	0.000217694	0.00021674	0.000217695	0.000216798	0.000217811	0.000216856		0.217232	0.000501163
52932	572	41001	Oregon	Baker County	-789.273	-1778.05	-703.605	-1584.81	215.769	486.078	192.349	433.25		0.000217634	0.000216621	0.000217395	0.000216472	0.000217748	0.000216735	0.000217509	0.000216585		0.217087	0.000532016
53032	672	17095	Illinois	Knox County	-781.814	-1766.84	-697.315	-1575.61	213.733	483.02	190.632	430.74		0.000215577	0.000215255	0.000215452	0.000215215	0.000215693	0.000215371	0.000215567	0.000215331		0.215433	0.000169218
53226	866	46081	South Dakota	Lawrence County	-780.665	-1766.84	-696.559	-1576.09	213.416	483.013	190.423	430.867		0.00021526	0.000215255	0.000215218	0.000215281	0.000215373	0.000215368	0.000215331	0.000215394		0.21531	6.52349e-05
53343	983	27007	Minnesota	Beltrami County	-774.261	-1761.25	-690.788	-1570.58	211.667	481.489	188.847	429.364		0.000213495	0.000214573	0.000213435	0.000214528	0.000213608	0.000214688	0.000213549	0.000214643		0.214065	0.000584597
53831	1471	19127	Iowa	Marshall County	-777.564	-1753.95	-693.485	-1563.87	212.57	479.494	189.585	427.531		0.000214405	0.000213684	0.000214268	0.000213612	0.00021452	0.000213799	0.000214383	0.000213726		0.21405	0.000377744
54075	1715	27035	Minnesota	Crow Wing County	-776.108	-1750.59	-692.315	-1561.06	212.172	478.576	189.265	426.76		0.000214004	0.000213275	0.000213907	0.000213227	0.000214118	0.00021339	0.000214021	0.000213341		0.21366	0.000383468
54381	2021	40047	Oklahoma	Garfield County	-774.195	-1747.65	-690.696	-1558.56	211.649	477.774	188.823	426.079		0.000213476	0.000212917	0.000213407	0.000212886	0.000213591	0.000213032	0.000213521	0.000213001		0.213229	0.000296264
54700	2340	1125	Alabama	Tuscaloosa County	-766.209	-1751.46	-683.88	-1562.24	209.468	478.819	186.96	427.088		0.000211274	0.000213382	0.000211301	0.000213389	0.000211389	0.000213498	0.000211415	0.000213505		0.212394	0.00112334
55257	2897	40125	Oklahoma	Pottawatomie County	-768.546	-1740.25	-685.677	-1551.98	210.106	475.751	187.451	424.28		0.000211919	0.000212015	0.000211856	0.000211987	0.000212033	0.00021213	0.00021197	0.000212101		0.212001	9.00719e-05
55355	2995	27013	Minnesota	Blue Earth County	-767.734	-1737.2	-685.096	-1549.33	209.883	474.915	187.291	423.556		0.000211695	0.000211644	0.000211676	0.000211626	0.000211808	0.000211757	0.000211789	0.000211739		0.211717	6.68859e-05
52373	13	46083	South Dakota	Lincoln County	-763.615	-1727.24	-682.44	-1541.9	208.756	472.192	186.565	421.523		0.000210559	0.000210431	0.000210856	0.000210611	0.000210671	0.000210543	0.000210968	0.000210723		0.21067	0.000175253
52746	386	31053	Nebraska	Dodge County	-762.605	-1720.15	-680.235	-1533.82	208.48	470.252	185.962	419.314		0.000210281	0.000209566	0.000210174	0.000209507	0.000210392	0.000209678	0.000210286	0.000209619		0.209938	0.000376951
53134	774	55043	Wisconsin	Grant County	-761.289	-1718.93	-678.98	-1532.47	208.121	469.92	185.62	418.947		0.000209918	0.000209418	0.000209787	0.000209323	0.00021003	0.00020953	0.000209899	0.000209435		0.209667	0.00027147
53738	1378	29165	Missouri	Platte County	-756.997	-1704.99	-675.691	-1520.87	206.948	466.109	184.72	415.776		0.000208734	0.000207719	0.00020877	0.000207738	0.000208846	0.000207831	0.000208882	0.00020785		0.208296	0.000550556
55168	2808	55017	Wisconsin	Chippewa County	-754.571	-1705.69	-673.314	-1521.52	206.285	466.302	184.07	415.952		0.000208065	0.000207805	0.000208036	0.000207826	0.000208177	0.000207917	0.000208147	0.000207938		0.207989	0.000139656
54538	2178	45079	South Carolina	Richland County	-748.826	-1702.38	-668.503	-1518.68	204.715	465.4	182.757	415.18		0.000206481	0.000207402	0.00020655	0.000207439	0.000206593	0.000207515	0.000206662	0.000207552		0.207024	0.000488618
52374	14	55055	Wisconsin	Jefferson County	-750.416	-1692.55	-669.637	-1509.47	205.149	462.71	183.066	412.659		0.00020692	0.000206204	0.0002069	0.000206181	0.000207031	0.000206315	0.000207011	0.000206292		0.206607	0.000388245
52453	93	20169	Kansas	Saline County	-747.037	-1687.77	-666.517	-1505.09	204.225	461.402	182.212	411.46		0.000205988	0.000205622	0.000205936	0.000205582	0.000206098	0.000205732	0.000206046	0.000205692		0.205837	0.000202704
52660	300	47125	Tennessee	Montgomery County	-744.971	-1688.94	-665.703	-1507.62	203.661	461.726	181.991	412.154		0.000205418	0.000205765	0.000205684	0.000205928	0.000205529	0.000205876	0.000205796	0.00020604		0.205754	0.000205917
52747	387	35025	New Mexico	Lea County	-744.512	-1690.34	-664.598	-1507.85	203.534	462.105	181.687	412.214		0.000205292	0.000205935	0.000205343	0.000205959	0.000205401	0.000206045	0.000205453	0.000206069		0.205687	0.000342509
52933	573	39057	Ohio	Greene County	-745.892	-1684.98	-665.516	-1502.83	203.913	460.642	181.94	410.845		0.000205672	0.000205282	0.000205627	0.000205274	0.000205783	0.000205393	0.000205738	0.000205385		0.205519	0.000207961
53033	673	17177	Illinois	Stephenson County	-743.973	-1680.08	-663.604	-1498.35	203.388	459.3	181.416	409.619		0.000205143	0.000204684	0.000205036	0.000204662	0.000205253	0.000204795	0.000205146	0.000204772		0.204936	0.000233863
53135	775	12091	Florida	Okaloosa County	-743.137	-1679.65	-663.142	-1498.15	203.16	459.187	181.291	409.568		0.000204913	0.000204633	0.000204893	0.000204635	0.000205024	0.000204745	0.000205004	0.000204747		0.204824	0.000155654
53227	867	53017	Washington	Douglas County	-742.394	-1675.26	-662.356	-1493.9	202.955	457.98	181.074	408.4		0.000204708	0.000204098	0.00020465	0.000204054	0.000204816	0.000204206	0.000204759	0.000204163		0.204432	0.00032873
53344	984	12113	Florida	Santa Rosa County	-739.95	-1673.33	-660.341	-1492.66	202.289	457.459	180.525	408.068		0.000204034	0.000203863	0.000204028	0.000203885	0.000204145	0.000203974	0.000204138	0.000203997		0.204008	0.000102949
53653	1293	53031	Washington	Jefferson County	-738.998	-1666.2	-658.899	-1485.44	202.028	455.507	180.13	406.091		0.000203771	0.000202994	0.000203582	0.000202899	0.000203881	0.000203103	0.000203692	0.000203008		0.203366	0.000402815
53739	1379	31019	Nebraska	Buffalo County	-735.401	-1661.98	-656.368	-1482.42	201.043	454.349	179.437	405.262		0.000202779	0.000202479	0.0002028	0.000202486	0.000202887	0.000202587	0.000202908	0.000202594		0.20269	0.000174229
53832	1472	18035	Indiana	Delaware County	-733.305	-1663.61	-654.22	-1483.71	200.472	454.8	178.851	405.617		0.000202202	0.000202678	0.000202136	0.000202662	0.000202311	0.000202788	0.000202245	0.000202772		0.202474	0.000275546
53998	1638	1117	Alabama	Shelby County	-734.037	-1659.19	-655.388	-1480.36	200.672	453.592	179.171	404.704		0.000202403	0.000202139	0.000202497	0.000202205	0.000202513	0.000202249	0.000202607	0.000202315		0.202366	0.000165594
54238	1878	9005	Connecticut	Litchfield County	-731.18	-1653.1	-652.291	-1474.5	199.891	451.927	178.324	403.102		0.000201615	0.000201398	0.00020154	0.000201405	0.000201725	0.000201507	0.00020165	0.000201514		0.201544	0.000114617
54701	2341	21117	Kentucky	Kenton County	-727.273	-1649.84	-649.178	-1471.99	198.823	451.036	177.473	402.413		0.000200538	0.000201001	0.000200579	0.000201061	0.000200646	0.00020111	0.000200687	0.00020117		0.200849	0.000260763
54768	2408	47189	Tennessee	Wilson County	-722.862	-1637.58	-645.165	-1461	197.617	447.684	176.376	399.41		0.000199322	0.000199507	0.000199339	0.00019956	0.00019943	0.000199615	0.000199446	0.000199668		0.199486	0.000124907
54888	2528	36111	New York	Ulster County	-720.392	-1631.27	-642.711	-1454.92	196.942	445.959	175.706	397.75		0.000198641	0.000198738	0.000198581	0.00019873	0.000198748	0.000198846	0.000198688	0.000198838		0.198726	9.06282e-05
55298	2938	34035	New Jersey	Somerset County	-721.734	-1626.27	-644.113	-1450.62	197.309	444.593	176.089	396.574		0.000199011	0.000198129	0.000199014	0.000198143	0.000199119	0.000198237	0.000199122	0.000198251		0.198628	0.000471902
52748	388	5125	Arkansas	Saline County	-718.406	-1623.16	-641.174	-1448.03	196.399	443.742	175.285	395.864		0.000198093	0.000197751	0.000198106	0.000197789	0.0001982	0.000197858	0.000198213	0.000197896		0.197988	0.000185927
53136	776	17037	Illinois	DeKalb County	-718.009	-1621.21	-641.169	-1446.66	196.29	443.206	175.283	395.49		0.000197984	0.000197512	0.000198104	0.000197602	0.00019809	0.000197619	0.000198211	0.000197709		0.197854	0.00027233
52585	225	5031	Arkansas	Craighead County	-717.898	-1621.95	-640.706	-1446.74	196.26	443.41	175.157	395.511		0.000197953	0.000197602	0.000197961	0.000197612	0.00019806	0.000197709	0.000198068	0.000197719		0.197836	0.000195458
54587	2227	55075	Wisconsin	Marinette County	-714.945	-1619.64	-637.639	-1444.76	195.452	442.778	174.318	394.968		0.000197139	0.000197321	0.000197013	0.000197342	0.000197245	0.000197428	0.000197119	0.000197448		0.197257	0.000155537
52894	534	30003	Montana	Big Horn County	-712.257	-1615.52	-635.657	-1440.86	194.714	441.643	173.774	393.897		0.000196398	0.000196819	0.000196401	0.000196809	0.0001965	0.000196922	0.000196503	0.000196912		0.196658	0.000228559
53654	1294	27139	Minnesota	Scott County	-714.52	-1604.07	-638.21	-1431.36	195.335	438.52	174.474	391.306		0.000197022	0.000195425	0.00019719	0.000195512	0.000197127	0.000195529	0.000197295	0.000195617		0.19634	0.000879949
52375	15	13089	Georgia	DeKalb County	-710.421	-1609.37	-634.525	-1436.16	194.216	439.972	173.468	392.62		0.000195891	0.00019607	0.000196051	0.000196167	0.000195997	0.000196177	0.000196157	0.000196274		0.196098	0.000120277
52454	94	36089	New York	St. Lawrence County	-712.064	-1606.43	-635.252	-1432.52	194.665	439.167	173.666	391.624		0.000196345	0.000195712	0.000196276	0.00019567	0.000196451	0.000195818	0.000196382	0.000195776		0.196054	0.00033735
54382	2022	48037	Texas	Bowie County	-709.28	-1607.48	-632.757	-1433.76	193.904	439.455	172.984	391.962		0.000195577	0.00019584	0.000195505	0.000195839	0.000195682	0.000195946	0.00019561	0.000195945		0.195743	0.000171719
52455	95	6005	California	Amador County	-710.021	-1600.72	-633.145	-1427.09	194.103	437.598	173.087	390.133		0.000195781	0.000195016	0.000195625	0.000194929	0.000195883	0.000195118	0.000195727	0.000195031		0.195389	0.000400138
54239	1879	22109	Louisiana	Terrebonne Parish	-706.79	-1606.43	-630.847	-1432.88	193.223	439.168	172.462	391.724		0.00019489	0.000195712	0.000194915	0.00019572	0.000194996	0.000195818	0.00019502	0.000195826		0.195362	0.000438773
54471	2111	28089	Mississippi	Madison County	-709.179	-1601.59	-632.55	-1427.93	193.877	437.845	172.928	390.37		0.000195549	0.000195122	0.000195441	0.000195043	0.000195655	0.000195228	0.000195547	0.000195149		0.195342	0.00023298
52749	389	39139	Ohio	Richland County	-707.65	-1599.43	-631.266	-1426.43	193.458	437.255	172.576	389.958		0.000195127	0.00019486	0.000195044	0.000194838	0.000195233	0.000194965	0.00019515	0.000194943		0.19502	0.000142386
52934	574	29043	Missouri	Christian County	-707.665	-1598.8	-631.557	-1426.03	193.462	437.079	172.655	389.848		0.000195131	0.000194782	0.000195134	0.000194783	0.000195236	0.000194887	0.000195239	0.000194888		0.19501	0.000195412
53034	674	42085	Pennsylvania	Mercer County	-704.043	-1591.55	-627.908	-1419.23	192.472	435.101	171.658	387.99		0.000194133	0.0001939	0.000194007	0.000193854	0.000194238	0.000194005	0.000194112	0.000193959		0.194026	0.000127706
53137	777	16041	Idaho	Franklin County	-703.178	-1587.52	-627.665	-1416.22	192.229	433.982	171.586	387.155		0.000193894	0.000193408	0.000193932	0.000193444	0.000193992	0.000193506	0.00019403	0.000193542		0.193718	0.000266277
53345	985	5145	Arkansas	White County	-701.068	-1585.78	-625.564	-1414.37	191.659	433.523	171.017	386.662		0.000193312	0.000193196	0.000193283	0.000193191	0.000193417	0.000193301	0.000193387	0.000193295		0.193298	7.94358e-05
53575	1215	48183	Texas	Gregg County	-698.492	-1588.28	-623.231	-1416.79	190.955	434.207	170.38	387.323		0.000192602	0.000193501	0.000192562	0.000193521	0.000192706	0.000193606	0.000192665	0.000193626		0.193099	0.00050048
53833	1473	19049	Iowa	Dallas County	-698.803	-1576.14	-624.091	-1406.5	191.038	430.885	170.614	384.509		0.000192688	0.000192022	0.000192827	0.000192116	0.000192791	0.000192125	0.00019293	0.000192219		0.192465	0.000377381
54164	1804	5005	Arkansas	Baxter County	-698.214	-1578.17	-622.597	-1407.13	190.878	431.441	170.206	384.682		0.000192525	0.000192269	0.000192366	0.000192202	0.000192629	0.000192373	0.000192469	0.000192306		0.192392	0.000141265
54383	2023	42107	Pennsylvania	Schuylkill County	-696.427	-1576.3	-621.061	-1405.68	190.391	430.933	169.787	384.287		0.000192033	0.000192042	0.000191891	0.000192004	0.000192137	0.000192146	0.000191995	0.000192108		0.192045	8.50747e-05
54588	2228	29051	Missouri	Cole County	-695.728	-1572.77	-620.892	-1402.69	190.198	429.964	169.74	383.467		0.00019184	0.000191611	0.000191839	0.000191595	0.000191943	0.000191714	0.000191942	0.000191698		0.191773	0.000137876
53228	868	26159	Michigan	Van Buren County	-695.209	-1573.08	-620.307	-1403.27	190.057	430.05	169.58	383.626		0.000191697	0.000191649	0.000191658	0.000191674	0.0001918	0.000191753	0.000191761	0.000191778		0.191721	5.85403e-05
53740	1380	38093	North Dakota	Stutsman County	-695.244	-1573.15	-620.182	-1403.06	190.065	430.067	169.544	383.567		0.000191707	0.000191658	0.00019162	0.000191646	0.000191808	0.00019176	0.000191721	0.000191748		0.191709	6.39412e-05
54472	2112	55005	Wisconsin	Barron County	-695.793	-1570.91	-620.615	-1400.99	190.216	429.454	169.664	383.001		0.000191858	0.000191384	0.000191754	0.000191363	0.000191961	0.000191487	0.000191856	0.000191466		0.191641	0.00024083
52750	390	24021	Maryland	Frederick County	-694.624	-1563.09	-619.826	-1393.78	189.898	427.32	169.449	381.035		0.000191536	0.000190432	0.00019151	0.000190379	0.000191639	0.000190535	0.000191613	0.000190482		0.191016	0.000600216
52429	69	39003	Ohio	Allen County	-691.491	-1563.15	-617.011	-1394.3	189.041	427.337	168.679	381.175		0.000190672	0.00019044	0.00019064	0.00019045	0.000190774	0.000190543	0.000190743	0.000190553		0.190602	0.000126046
54889	2529	22015	Louisiana	Bossier Parish	-689.078	-1560.65	-615.082	-1392.14	188.381	426.652	168.152	380.584		0.000190006	0.000190135	0.000190044	0.000190154	0.000190109	0.000190238	0.000190147	0.000190257		0.190136	8.56811e-05
54769	2409	39133	Ohio	Portage County	-688.967	-1560.04	-614.796	-1391.62	188.351	426.486	168.074	380.443		0.000189976	0.000190061	0.000189956	0.000190084	0.000190078	0.000190164	0.000190058	0.000190187		0.19007	8.00612e-05
52430	70	53029	Washington	Island County	-689.29	-1555.84	-614.784	-1387.21	188.439	425.337	168.07	379.235		0.000190065	0.000189549	0.000189952	0.000189481	0.000190167	0.000189651	0.000190054	0.000189583		0.189813	0.000273987
54702	2342	26091	Michigan	Lenawee County	-689.339	-1554.72	-614.914	-1386.39	188.452	425.03	168.106	379.012		0.000190078	0.000189412	0.000189992	0.000189369	0.000190181	0.000189514	0.000190094	0.000189471		0.189764	0.000350783
52376	16	48213	Texas	Henderson County	-687.406	-1556.07	-613.18	-1387.78	187.924	425.4	167.632	379.393		0.000189545	0.000189577	0.000189456	0.000189559	0.000189647	0.000189679	0.000189558	0.000189662		0.189585	7.38632e-05
52751	391	16069	Idaho	Nez Perce County	-685.81	-1550.85	-611.668	-1382.89	187.487	423.971	167.218	378.053		0.000189105	0.00018894	0.000188989	0.00018889	0.000189206	0.000189042	0.00018909	0.000188992		0.189032	0.000100811
54770	2410	55085	Wisconsin	Oneida County	-684.399	-1545.87	-610.341	-1378.51	187.101	422.61	166.855	376.858		0.000188716	0.000188334	0.000188579	0.000188293	0.000188817	0.000188435	0.00018868	0.000188395		0.188531	0.000194132
53229	869	35017	New Mexico	Grant County	-683.055	-1547.02	-609.206	-1379.57	186.731	422.918	166.543	377.141		0.000188346	0.000188474	0.000188228	0.000188437	0.000188444	0.000188573	0.000188327	0.000188536		0.188421	0.000114347
54890	2530	39173	Ohio	Wood County	-683.302	-1544.95	-609.772	-1378.03	186.802	422.359	166.7	376.726		0.000188414	0.000188222	0.000188403	0.000188227	0.000188515	0.000188323	0.000188505	0.000188329		0.188367	0.00011249
52377	17	31141	Nebraska	Platte County	-684.023	-1543.3	-610.362	-1376.42	186.998	421.905	166.86	376.285		0.000188612	0.00018802	0.000188586	0.000188008	0.000188713	0.000188121	0.000188686	0.000188108		0.188357	0.000317445
53834	1474	21059	Kentucky	Daviess County	-682.226	-1543.15	-608.756	-1376.59	186.508	421.869	166.422	376.333		0.000188117	0.000188003	0.000188089	0.00018803	0.000188218	0.000188105	0.000188191	0.000188132		0.188111	7.28578e-05
54891	2531	41003	Oregon	Benton County	-680.267	-1540.9	-607.044	-1374.22	185.972	421.251	165.954	375.685		0.000187577	0.000187728	0.000187561	0.000187707	0.000187677	0.000187829	0.000187661	0.000187808		0.187694	9.67754e-05
52935	575	55109	Wisconsin	St. Croix County	-677.658	-1524.3	-604.976	-1359.73	185.258	416.713	165.388	371.724		0.000186857	0.000185706	0.000186921	0.000185728	0.000186957	0.000185806	0.000187021	0.000185828		0.186353	0.000629444
53999	1639	29031	Missouri	Cape Girardeau County	-676.415	-1526.24	-603.391	-1360.82	184.919	417.245	164.955	372.023		0.000186515	0.000185942	0.000186432	0.000185877	0.000186615	0.000186043	0.000186532	0.000185978		0.186242	0.000308436
54126	1766	12111	Florida	St. Lucie County	-674.104	-1525.77	-601.407	-1360.75	184.288	417.118	164.414	372.005		0.000185877	0.000185885	0.000185819	0.000185867	0.000185979	0.000185986	0.00018592	0.000185969		0.185913	6.07617e-05
54657	2297	19181	Iowa	Warren County	-672.668	-1518.81	-600.235	-1354.71	183.894	415.212	164.092	370.349		0.000185482	0.000185037	0.000185457	0.000185042	0.000185581	0.000185137	0.000185556	0.000185141		0.185304	0.000235809
52661	301	39045	Ohio	Fairfield County	-671.437	-1512.88	-599.159	-1349.4	183.558	413.593	163.799	368.901		0.000185142	0.000184315	0.000185124	0.000184317	0.000185242	0.000184415	0.000185224	0.000184417		0.184774	0.000440186
54892	2532	27027	Minnesota	Clay County	-669.398	-1510.52	-597.542	-1347.43	182.999	412.946	163.355	368.359		0.00018458	0.000184028	0.000184625	0.000184047	0.000184678	0.000184126	0.000184723	0.000184146		0.184369	0.000306827
54893	2533	42013	Pennsylvania	Blair County	-667.933	-1513.29	-595.664	-1349.33	182.601	413.705	162.844	368.882		0.000184176	0.000184364	0.000184044	0.000184307	0.000184276	0.000184464	0.000184144	0.000184407		0.184273	0.00014278
54894	2534	19045	Iowa	Clinton County	-668.334	-1507.97	-596.118	-1344.67	182.709	412.249	162.967	367.605		0.000184286	0.000183717	0.000184184	0.00018367	0.000184385	0.000183815	0.000184283	0.000183769		0.184014	0.00029753
52752	392	16043	Idaho	Fremont County	-667.624	-1505.93	-596.042	-1343.64	182.512	411.683	162.943	367.318		0.000184091	0.000183468	0.000184161	0.00018353	0.000184186	0.000183563	0.000184256	0.000183625		0.18386	0.000340662
52456	96	42081	Pennsylvania	Lycoming County	-665.018	-1503.62	-593.111	-1340.68	181.804	411.063	162.146	366.517		0.000183372	0.000183187	0.000183255	0.000183126	0.000183471	0.000183286	0.000183354	0.000183225		0.183285	0.000111218
52662	302	45063	South Carolina	Lexington County	-662.989	-1499.48	-591.598	-1337.42	181.249	409.93	161.732	365.626		0.000182813	0.000182682	0.000182788	0.00018268	0.000182912	0.000182781	0.000182887	0.00018278		0.18279	8.33249e-05
52753	393	36075	New York	Oswego County	-661.262	-1496.13	-589.984	-1334.48	180.777	409.015	161.291	364.821		0.000182336	0.000182274	0.000182289	0.000182278	0.000182435	0.000182373	0.000182388	0.000182377		0.182344	5.90621e-05
54165	1805	33015	New Hampshire	Rockingham County	-661.489	-1493.93	-590.219	-1332.69	180.839	408.412	161.355	364.332		0.000182399	0.000182006	0.000182362	0.000182034	0.000182498	0.000182105	0.000182461	0.000182133		0.18225	0.000200581
54539	2179	47113	Tennessee	Madison County	-658.51	-1493.59	-587.688	-1332.41	180.024	408.32	160.663	364.255		0.000181578	0.000181965	0.00018158	0.000181996	0.000181676	0.000182064	0.000181678	0.000182094		0.181829	0.000221425
54589	2229	51087	Virginia	Henrico County	-660.085	-1489.17	-589.123	-1328.36	180.455	407.111	161.056	363.149		0.000182012	0.000181426	0.000182023	0.000181443	0.000182111	0.000181524	0.000182122	0.000181541		0.181775	0.000316402
55258	2898	48231	Texas	Hunt County	-657.691	-1493.26	-586.866	-1332.09	179.8	408.23	160.438	364.169		0.000181352	0.000181925	0.000181326	0.000181953	0.000181449	0.000182023	0.000181424	0.000182051		0.181688	0.000325437
55356	2996	22105	Louisiana	Tangipahoa Parish	-655.225	-1494.93	-584.85	-1333.37	179.127	408.685	159.887	364.518		0.000180672	0.000182127	0.000180703	0.000182127	0.00018077	0.000182226	0.000180801	0.000182226		0.181456	0.000771688
54384	2024	40037	Oklahoma	Creek County	-657.695	-1489.47	-586.706	-1328.26	179.801	407.191	160.394	363.12		0.000181353	0.000181463	0.000181277	0.000181429	0.00018145	0.00018156	0.000181374	0.000181527		0.181429	9.29416e-05
54240	1880	37051	North Carolina	Cumberland County	-657.905	-1488.05	-587.351	-1327.38	179.859	406.805	160.571	362.881		0.000181411	0.000181289	0.000181476	0.000181309	0.000181509	0.000181388	0.000181574	0.000181407		0.18142	9.67185e-05
52523	163	6115	California	Yuba County	-655.698	-1482.34	-585.181	-1321.92	179.253	405.239	159.976	361.384		0.000180802	0.000180594	0.000180805	0.000180563	0.000180898	0.00018069	0.000180901	0.000180659		0.180739	0.0001313
54895	2535	55021	Wisconsin	Columbia County	-656.107	-1481.3	-585.426	-1321.21	179.367	404.959	160.044	361.193		0.000180915	0.000180468	0.000180881	0.000180466	0.000181012	0.000180565	0.000180978	0.000180563		0.180731	0.000236382
53230	870	27067	Minnesota	Kandiyohi County	-655.526	-1478.97	-584.768	-1318.83	179.207	404.319	159.863	360.542		0.000180755	0.000180183	0.000180678	0.000180142	0.000180851	0.000180279	0.000180774	0.000180238		0.180487	0.00030226
54473	2113	40101	Oklahoma	Muskogee County	-653.391	-1477.77	-582.91	-1317.85	178.624	403.993	159.356	360.275		0.000180166	0.000180037	0.000180104	0.000180008	0.000180263	0.000180134	0.0001802	0.000180105		0.180127	8.34598e-05
54896	2536	41007	Oregon	Clatsop County	-652.568	-1475.18	-582.034	-1315.49	178.399	403.287	159.117	359.63		0.000179939	0.000179722	0.000179833	0.000179685	0.000180036	0.000179819	0.00017993	0.000179782		0.179843	0.000118079
54897	2537	30105	Montana	Valley County	-652.548	-1474.28	-581.975	-1314.64	178.392	403.036	159.099	359.391		0.000179933	0.000179613	0.000179815	0.000179568	0.000180028	0.000179707	0.000179909	0.000179663		0.17978	0.000166888
53453	1093	48049	Texas	Brown County	-651.393	-1476.52	-581.041	-1316.7	178.078	403.651	158.846	359.961		0.000179615	0.000179885	0.000179526	0.00017985	0.000179712	0.000179982	0.000179623	0.000179947		0.179767	0.000170859
52378	18	30095	Montana	Stillwater County	-647.702	-1465.08	-577.891	-1306.82	177.066	400.519	157.981	357.254		0.000178597	0.000178492	0.000178553	0.000178501	0.00017869	0.000178585	0.000178646	0.000178594		0.178582	6.72541e-05
52586	226	22063	Louisiana	Livingston Parish	-644.893	-1463.07	-575.718	-1305.15	176.302	399.976	157.391	356.805		0.000177823	0.000178246	0.000177882	0.000178273	0.000177919	0.000178343	0.000177978	0.00017837		0.178104	0.000225281
52524	164	20015	Kansas	Butler County	-641.47	-1449.17	-572.342	-1292.32	175.365	396.175	156.467	353.296		0.000176879	0.000176553	0.000176838	0.000176521	0.000176974	0.000176648	0.000176933	0.000176616		0.176745	0.00018026
55422	3062	39041	Ohio	Delaware County	-641.908	-1442.5	-573.193	-1287.17	175.485	394.352	156.7	351.889		0.000177	0.00017574	0.000177101	0.000175817	0.000177095	0.000175836	0.000177197	0.000175912		0.176462	0.000683409
52457	97	40071	Oklahoma	Kay County	-638.882	-1443.92	-569.921	-1287.63	174.658	394.738	155.805	352.013		0.000176165	0.000175913	0.00017609	0.00017588	0.00017626	0.000176008	0.000176185	0.000175974		0.176059	0.000137061
52754	394	39007	Ohio	Ashtabula County	-638.226	-1442.61	-569.345	-1286.66	174.479	394.382	155.648	351.749		0.000175985	0.000175754	0.000175912	0.000175747	0.00017608	0.000175849	0.000176007	0.000175842		0.175897	0.000120583
52936	576	46029	South Dakota	Codington County	-635.147	-1437.21	-566.904	-1282.25	173.636	392.904	154.98	350.539		0.000175135	0.000175096	0.000175158	0.000175144	0.000175228	0.00017519	0.000175251	0.000175238		0.17518	5.54636e-05
53655	1295	36083	New York	Rensselaer County	-636.444	-1434.4	-567.767	-1279.07	173.992	392.138	155.217	349.674		0.000175493	0.000174753	0.000175425	0.00017471	0.000175588	0.000174848	0.00017552	0.000174805		0.175143	0.000393382
54898	2538	23031	Maine	York County	-633.45	-1434.89	-565.13	-1280.14	173.174	392.273	154.496	349.966		0.000174667	0.000174813	0.00017461	0.000174856	0.000174762	0.000174908	0.000174705	0.000174951		0.174784	0.000119464
53835	1475	45091	South Carolina	York County	-632.839	-1432.9	-564.786	-1278.13	173.007	391.728	154.402	349.416		0.000174499	0.00017457	0.000174504	0.000174581	0.000174593	0.000174665	0.000174598	0.000174676		0.174586	6.46016e-05
54094	1734	39109	Ohio	Miami County	-632.298	-1427.71	-564.105	-1273.43	172.858	390.308	154.216	348.131		0.00017435	0.000173938	0.000174293	0.000173939	0.000174444	0.000174032	0.000174387	0.000174034		0.174177	0.000211819
54540	2180	25003	Massachusetts	Berkshire County	-630.842	-1428.01	-562.592	-1273.57	172.461	390.391	153.802	348.171		0.000173948	0.000173975	0.000173826	0.000173959	0.000174043	0.000174069	0.00017392	0.000174054		0.173974	8.08998e-05
52379	19	17073	Illinois	Henry County	-629.947	-1422.61	-562.026	-1268.94	172.215	388.912	153.647	346.902		0.000173701	0.000173317	0.000173651	0.000173326	0.000173795	0.00017341	0.000173744	0.000173419		0.173545	0.000197107
53741	1381	55115	Wisconsin	Shawano County	-630.199	-1422.25	-562.046	-1268.1	172.284	388.815	153.652	346.674		0.000173771	0.000173273	0.000173657	0.000173212	0.000173864	0.000173366	0.00017375	0.000173305		0.173525	0.000261523
54703	2343	4017	Arizona	Navajo County	-622.732	-1428.8	-555.621	-1274.26	170.083	390.237	151.753	348.031		0.000171712	0.000174071	0.000171672	0.000174054	0.000171643	0.000174001	0.000171603	0.000173984		0.172842	0.00126742
54166	1806	29145	Missouri	Newton County	-625.92	-1417.31	-558.469	-1264.07	171.114	387.465	152.674	345.572		0.000172591	0.000172671	0.000172552	0.000172662	0.000172684	0.000172764	0.000172645	0.000172755		0.172665	7.26445e-05
54899	2539	51107	Virginia	Loudoun County	-627.112	-1410.22	-560.594	-1259.26	171.441	385.528	153.256	344.258		0.00017292	0.000171808	0.000173209	0.000172004	0.000173013	0.000171901	0.000173303	0.000172098		0.172532	0.000635147
54385	2025	36087	New York	Rockland County	-626.253	-1413.5	-558.899	-1260.73	171.206	386.426	152.793	344.661		0.000172683	0.000172207	0.000172685	0.000172205	0.000172777	0.000172301	0.000172779	0.000172299		0.172492	0.000260153
52587	227	21227	Kentucky	Warren County	-622.037	-1417.37	-555.384	-1264.78	170.053	387.482	151.832	345.768		0.00017152	0.000172678	0.000171599	0.000172759	0.000171613	0.000172772	0.000171691	0.000172852		0.172186	0.000623178
54900	2540	24025	Maryland	Harford County	-623.071	-1414.07	-555.997	-1261.61	170.336	386.581	152	344.9		0.000171806	0.000172277	0.000171788	0.000172325	0.000171899	0.000172371	0.000171881	0.000172419		0.172096	0.000274797
54474	2114	8075	Colorado	Logan County	-623.15	-1409.63	-555.829	-1256.79	170.355	385.361	151.951	343.577		0.000171827	0.000171736	0.000171736	0.000171666	0.000171918	0.000171827	0.000171826	0.000171757		0.171787	7.78393e-05
53656	1296	21093	Kentucky	Hardin County	-622.723	-1408.62	-555.872	-1256.82	170.241	385.09	151.965	343.592		0.00017171	0.000171613	0.00017175	0.000171672	0.000171802	0.000171706	0.000171842	0.000171765		0.171732	7.32655e-05
52380	20	22097	Louisiana	St. Landry Parish	-619.776	-1405.14	-552.996	-1253.11	169.435	384.14	151.179	342.578		0.000170897	0.000171189	0.000170861	0.000171165	0.00017099	0.000171282	0.000170953	0.000171258		0.171074	0.000167728
53742	1382	28059	Mississippi	Jackson County	-617.982	-1403.49	-551.476	-1251.76	168.945	383.689	150.764	342.207		0.000170402	0.000170988	0.000170391	0.000170979	0.000170495	0.000171081	0.000170484	0.000171072		0.170737	0.000317768
52755	395	16031	Idaho	Cassia County	-618.67	-1397.21	-552.068	-1246.16	169.129	381.96	150.921	340.667		0.000170592	0.000170222	0.000170574	0.000170215	0.00017068	0.00017031	0.000170662	0.000170302		0.170445	0.000200668
53231	871	55081	Wisconsin	Monroe County	-618.478	-1393.56	-551.695	-1242.5	169.079	380.971	150.822	339.675		0.000170539	0.000169778	0.000170459	0.000169715	0.00017063	0.000169869	0.00017055	0.000169807		0.170168	0.00040691
55259	2899	41053	Oregon	Polk County	-615.08	-1391.58	-548.794	-1241	168.151	380.431	150.03	339.265		0.000169602	0.000169537	0.000169563	0.00016951	0.000169693	0.000169628	0.000169654	0.000169601		0.169598	6.08188e-05
54475	2115	48497	Texas	Wise County	-612.577	-1387.56	-546.71	-1237.76	167.467	379.333	149.46	338.379		0.000168912	0.000169047	0.000168919	0.000169067	0.000169003	0.000169139	0.00016901	0.000169159		0.169032	9.06174e-05
55169	2809	35009	New Mexico	Curry County	-611.663	-1384.19	-545.909	-1234.62	167.216	378.407	149.24	337.519		0.00016866	0.000168636	0.000168671	0.000168638	0.00016875	0.000168726	0.000168761	0.000168728		0.168696	5.05606e-05
52458	98	17141	Illinois	Ogle County	-610.273	-1379.17	-544.54	-1230.26	166.837	377.038	148.867	336.328		0.000168277	0.000168025	0.000168248	0.000168043	0.000168367	0.000168115	0.000168339	0.000168133		0.168193	0.000132042
54901	2541	48465	Texas	Val Verde County	-606.898	-1379.12	-541.794	-1230.65	165.914	377.025	148.116	336.437		0.000167346	0.000168019	0.0001674	0.000168097	0.000167436	0.00016811	0.00016749	0.000168188		0.167761	0.000371223
54241	1881	26111	Michigan	Midland County	-607.899	-1375.92	-542.415	-1227.52	166.188	376.149	148.286	335.581		0.000167622	0.000167629	0.000167592	0.000167669	0.000167712	0.000167719	0.000167682	0.00016776		0.167673	5.66301e-05
52459	99	40051	Oklahoma	Grady County	-607.551	-1375.63	-542.077	-1226.87	166.093	376.069	148.193	335.402		0.000167526	0.000167593	0.000167487	0.00016758	0.000167616	0.000167684	0.000167577	0.00016767		0.167592	6.62818e-05
52756	396	5069	Arkansas	Jefferson County	-606.274	-1375.66	-541.027	-1226.96	165.744	376.08	147.907	335.427		0.000167174	0.000167597	0.000167163	0.000167592	0.000167264	0.000167688	0.000167253	0.000167683		0.167427	0.000233092
52937	577	56025	Wyoming	Natrona County	-607.394	-1373.38	-541.957	-1224.65	165.907	375.133	148.033	334.507		0.000167483	0.000167319	0.00016745	0.000167276	0.000167429	0.000167266	0.000167396	0.000167223		0.167355	9.6686e-05
53035	675	48021	Texas	Bastrop County	-606.685	-1370.4	-541.492	-1222.37	165.856	374.642	148.033	334.173		0.000167287	0.000166957	0.000167306	0.000166965	0.000167377	0.000167047	0.000167397	0.000167056		0.167174	0.000185981
53138	778	29029	Missouri	Camden County	-604.424	-1368.65	-539.132	-1220.67	165.238	374.161	147.388	333.707		0.000166664	0.000166743	0.000166577	0.000166733	0.000166753	0.000166833	0.000166667	0.000166823		0.166724	8.56292e-05
53232	872	6035	California	Lassen County	-604.3	-1368.07	-539.258	-1219.97	165.203	374.001	147.422	333.515		0.00016663	0.000166672	0.000166616	0.000166638	0.000166718	0.000166761	0.000166705	0.000166727		0.166683	5.23346e-05
53576	1216	53065	Washington	Stevens County	-604.603	-1364.83	-539.261	-1217.1	165.287	373.119	147.424	332.732		0.000166713	0.000166278	0.000166617	0.000166246	0.000166803	0.000166368	0.000166707	0.000166335		0.166508	0.000224169
53836	1476	1103	Alabama	Morgan County	-603.441	-1367.02	-538.381	-1219.12	164.97	373.718	147.184	333.284		0.000166393	0.000166544	0.000166345	0.000166521	0.000166483	0.000166635	0.000166436	0.000166611		0.166496	0.000101953
54386	2026	53049	Washington	Pacific County	-604.346	-1361.99	-538.797	-1214.09	165.217	372.343	147.297	331.908		0.000166642	0.000165932	0.000166474	0.000165834	0.000166732	0.000166022	0.000166563	0.000165924		0.166266	0.000371291
54590	2230	47009	Tennessee	Blount County	-603.059	-1362.99	-538.028	-1215.73	164.865	372.615	147.087	332.357		0.000166288	0.000166053	0.000166236	0.000166058	0.000166377	0.000166143	0.000166326	0.000166148		0.166204	0.000121775
55357	2997	39029	Ohio	Columbiana County	-602.464	-1359.13	-537.361	-1211.9	164.702	371.562	146.904	331.311		0.000166123	0.000165584	0.00016603	0.000165535	0.000166213	0.000165674	0.00016612	0.000165625		0.165863	0.000283338
54476	2116	40119	Oklahoma	Payne County	-596.69	-1368.13	-532.66	-1220.54	163.123	374.021	145.619	333.67		0.000164531	0.00016668	0.000164578	0.000166715	0.000164619	0.00016677	0.000164666	0.000166805		0.165671	0.00114717
52381	21	48323	Texas	Maverick County	-598.961	-1360.57	-534.977	-1214.49	163.744	371.954	146.253	332.019		0.000165158	0.000165759	0.000165294	0.00016589	0.000165246	0.000165849	0.000165383	0.000165979		0.16557	0.000331536
52757	397	19099	Iowa	Jasper County	-597.862	-1349.34	-533.33	-1203.33	163.443	368.881	145.801	328.966		0.000164855	0.00016439	0.000164785	0.000164365	0.000164943	0.000164478	0.000164873	0.000164453		0.164643	0.000242616
52460	100	37063	North Carolina	Durham County	-596.394	-1349.43	-532.405	-1203.73	163.043	368.909	145.55	329.078		0.00016445	0.000164402	0.000164499	0.000164419	0.000164539	0.000164491	0.000164588	0.000164509		0.164487	6.18719e-05
53346	986	22057	Louisiana	Lafourche Parish	-594.589	-1344.94	-530.752	-1199.77	162.55	367.681	145.098	327.994		0.000163952	0.000163854	0.000163988	0.000163878	0.000164041	0.000163943	0.000164077	0.000163967		0.163963	7.49584e-05
54771	2411	37071	North Carolina	Gaston County	-593.67	-1346.55	-529.634	-1200.94	162.298	368.122	144.792	328.315		0.000163698	0.000164051	0.000163643	0.000164039	0.000163787	0.00016414	0.000163731	0.000164128		0.163902	0.000206703
54902	2542	27041	Minnesota	Douglas County	-593.134	-1337.88	-529.118	-1193.09	162.151	365.749	144.65	326.165		0.000163551	0.000162995	0.000163483	0.000162966	0.000163638	0.000163082	0.00016357	0.000163053		0.163292	0.000292078
54541	2181	30085	Montana	Roosevelt County	-591.369	-1339.36	-527.584	-1194.31	161.667	366.152	144.23	326.498		0.000163064	0.000163175	0.00016301	0.000163133	0.00016315	0.000163262	0.000163095	0.000163219		0.163138	8.20873e-05
55423	3063	27131	Minnesota	Rice County	-591.416	-1334.84	-527.795	-1190.56	161.681	364.919	144.288	325.474		0.000163077	0.000162625	0.000163074	0.00016262	0.000163164	0.000162712	0.000163161	0.000162707		0.162893	0.000246726
54903	2543	29187	Missouri	St. Francois County	-588.942	-1339.81	-525.462	-1195.25	161.005	366.278	143.651	326.759		0.000162395	0.00016323	0.000162354	0.000163261	0.000162482	0.000163318	0.000162441	0.000163349		0.162854	0.000468671
52461	101	47179	Tennessee	Washington County	-588.787	-1336.95	-525.297	-1192.45	160.964	365.496	143.606	325.993		0.000162352	0.000162881	0.000162303	0.000162878	0.00016244	0.000162969	0.00016239	0.000162967		0.162648	0.000299599
53657	1297	17199	Illinois	Williamson County	-590.305	-1333.27	-526.582	-1189.04	161.378	364.491	143.958	325.061		0.000162771	0.000162433	0.0001627	0.000162413	0.000162858	0.000162521	0.000162787	0.000162501		0.162623	0.000175517
52588	228	36069	New York	Ontario County	-590.132	-1330.72	-526.385	-1186.66	161.331	363.794	143.904	324.411		0.000162723	0.000162122	0.000162639	0.000162088	0.000162811	0.00016221	0.000162727	0.000162176		0.162437	0.000313294
54904	2544	45007	South Carolina	Anderson County	-588.877	-1333.22	-525.302	-1188.87	160.988	364.478	143.608	325.016		0.000162377	0.000162427	0.000162304	0.00016239	0.000162465	0.000162515	0.000162392	0.000162478		0.162419	6.69234e-05
52382	22	31001	Nebraska	Adams County	-588.224	-1329.64	-524.763	-1185.7	160.808	363.497	143.459	324.145		0.000162197	0.000161991	0.000162138	0.000161957	0.000162283	0.000162078	0.000162224	0.000162043		0.162114	0.000116201
55170	2810	48361	Texas	Orange County	-585.038	-1331.63	-521.921	-1187.55	159.938	364.044	142.684	324.655		0.000161318	0.000162233	0.00016126	0.00016221	0.000161405	0.000162322	0.000161347	0.000162298		0.161799	0.000501589
52938	578	12081	Florida	Manatee County	-585.306	-1324.85	-522.096	-1181.57	160.012	362.191	142.732	323.019		0.000161392	0.000161407	0.000161314	0.000161392	0.00016148	0.000161495	0.000161401	0.00016148		0.16142	6.12583e-05
53347	987	35055	New Mexico	Taos County	-584.07	-1325.54	-521.141	-1182.44	159.671	362.373	142.468	323.252		0.000161051	0.000161492	0.000161019	0.000161512	0.000161136	0.000161577	0.000161103	0.000161597		0.161311	0.000254061
53505	1145	40079	Oklahoma	Le Flore County	-584.663	-1323.12	-521.539	-1179.86	159.836	361.715	142.579	322.551		0.000161215	0.000161196	0.000161142	0.000161159	0.000161302	0.000161283	0.000161228	0.000161246		0.161221	5.58999e-05
54106	1746	55031	Wisconsin	Douglas County	-584.612	-1320.23	-521.401	-1177.02	159.821	360.925	142.541	321.773		0.000161201	0.000160845	0.000161099	0.000160771	0.000161287	0.000160931	0.000161185	0.000160857		0.161022	0.000194477
54242	1882	36101	New York	Steuben County	-582.46	-1318.29	-519.568	-1175.61	159.234	360.397	142.04	321.389		0.000160607	0.000160608	0.000160533	0.000160578	0.000160694	0.000160695	0.000160619	0.000160665		0.160625	5.69991e-05
54591	2231	12069	Florida	Lake County	-582.124	-1316.21	-519.245	-1173.88	159.142	359.83	141.952	320.917		0.000160515	0.000160355	0.000160433	0.000160342	0.000160602	0.000160442	0.00016052	0.000160429		0.160455	8.75187e-05
54772	2412	27141	Minnesota	Sherburne County	-581.798	-1312.25	-519.524	-1170.77	159.052	358.743	142.027	320.063		0.000160425	0.000159872	0.000160519	0.000159917	0.000160511	0.000159958	0.000160605	0.000160002		0.160226	0.000314514
55171	2811	42055	Pennsylvania	Franklin County	-579.479	-1311.79	-516.989	-1170.18	158.419	358.619	141.335	319.906		0.000159785	0.000159816	0.000159736	0.000159837	0.000159872	0.000159903	0.000159822	0.000159924		0.159837	6.16431e-05
54000	1640	13051	Georgia	Chatham County	-577.57	-1312.16	-515.49	-1170.39	157.897	358.72	140.926	319.963		0.000159259	0.000159861	0.000159273	0.000159865	0.000159346	0.000159948	0.000159359	0.000159952		0.159608	0.000322727
54243	1883	5033	Arkansas	Crawford County	-578.543	-1307.61	-516.265	-1166.32	158.162	357.474	141.137	318.848		0.000159527	0.000159306	0.000159512	0.000159309	0.000159613	0.000159392	0.000159598	0.000159395		0.159457	0.000122488
54127	1767	29213	Missouri	Taney County	-576.59	-1305.54	-514.439	-1164.37	157.629	356.91	140.638	318.317		0.000158989	0.000159055	0.000158948	0.000159043	0.000159074	0.000159141	0.000159033	0.000159129		0.159052	6.49849e-05
54542	2182	26087	Michigan	Lapeer County	-574.958	-1299.93	-513.032	-1159.76	157.182	355.377	140.253	317.056		0.000158539	0.000158371	0.000158513	0.000158414	0.000158624	0.000158457	0.000158599	0.000158499		0.158502	8.67759e-05
52589	229	36009	New York	Cattaraugus County	-574.279	-1295.85	-512.249	-1155.51	156.997	354.262	140.039	315.894		0.000158352	0.000157874	0.000158271	0.000157833	0.000158437	0.00015796	0.000158357	0.000157918		0.158125	0.000251387
52895	535	6075	California	San Francisco County	-573.948	-1296.66	-512.19	-1156.36	156.782	354.201	139.912	315.877		0.000158261	0.000157972	0.000158253	0.00015795	0.00015822	0.000157933	0.000158213	0.00015791		0.158089	0.00015965
53932	1572	40137	Oklahoma	Stephens County	-571.971	-1292.89	-510.213	-1152.93	156.366	353.451	139.482	315.189		0.000157715	0.000157513	0.000157642	0.000157481	0.0001578	0.000157598	0.000157727	0.000157566		0.15763	0.000111373
54001	1641	40019	Oklahoma	Carter County	-571.058	-1294.03	-509.372	-1153.85	156.116	353.762	139.253	315.44		0.000157464	0.000157652	0.000157382	0.000157606	0.000157548	0.000157737	0.000157467	0.000157691		0.157568	0.000124188
54477	2117	50007	Vermont	Chittenden County	-569.411	-1286.01	-508.183	-1147.09	155.667	351.573	138.928	313.592		0.000157009	0.000156676	0.000157015	0.000156682	0.000157094	0.000156761	0.0001571	0.000156767		0.156888	0.000183851
54704	2344	20103	Kansas	Leavenworth County	-568.301	-1283.65	-507.189	-1144.87	155.362	350.923	138.655	312.985		0.000156703	0.000156387	0.000156708	0.00015638	0.000156787	0.000156471	0.000156792	0.000156464		0.156586	0.000177918
54387	2027	26061	Michigan	Houghton County	-568.13	-1283.6	-506.784	-1144.63	155.315	350.911	138.545	312.918		0.000156656	0.000156382	0.000156583	0.000156346	0.00015674	0.000156466	0.000156667	0.00015643		0.156534	0.000147012
52758	398	39169	Ohio	Wayne County	-567.062	-1280.04	-505.94	-1141.63	155.024	349.938	138.315	312.101		0.000156362	0.000155947	0.000156322	0.000155938	0.000156446	0.000156032	0.000156406	0.000156022		0.156184	0.000218674
53837	1477	42089	Pennsylvania	Monroe County	-563.381	-1276.93	-502.718	-1138.92	154.018	349.089	137.434	311.359		0.000155347	0.000155569	0.000155326	0.000155566	0.000155431	0.000155653	0.00015541	0.000155651		0.155494	0.000131833
55108	2748	27119	Minnesota	Polk County	-562.772	-1270.43	-501.991	-1132.8	153.85	347.309	137.234	309.685		0.000155179	0.000154777	0.000155102	0.000154731	0.000155261	0.00015486	0.000155184	0.000154814		0.154989	0.000213621
53658	1298	26117	Michigan	Montcalm County	-561.417	-1271.46	-500.907	-1134.13	153.481	347.591	136.938	310.05		0.000154805	0.000154902	0.000154767	0.000154913	0.000154888	0.000154986	0.00015485	0.000154997		0.154888	8.03389e-05
54002	1642	1055	Alabama	Etowah County	-559.727	-1266.66	-499.223	-1129.38	153.019	346.282	136.478	308.752		0.000154339	0.000154318	0.000154247	0.000154264	0.000154423	0.000154402	0.00015433	0.000154348		0.154334	6.03949e-05
52383	23	18067	Indiana	Howard County	-559.597	-1266.23	-499.199	-1129.29	152.983	346.164	136.472	308.726		0.000154303	0.000154266	0.000154239	0.000154251	0.000154386	0.000154349	0.000154322	0.000154335		0.154306	5.14248e-05
54905	2545	20009	Kansas	Barton County	-557.127	-1257.8	-496.999	-1121.58	152.307	343.856	135.869	306.617		0.000153622	0.000153238	0.00015356	0.000153198	0.000153704	0.00015332	0.000153641	0.00015328		0.153446	0.000205842
52384	24	18105	Indiana	Monroe County	-553.189	-1260.3	-494.048	-1124.69	151.231	344.541	135.063	307.47		0.000152536	0.000153542	0.000152648	0.000153624	0.000152618	0.000153626	0.00015273	0.000153707		0.153129	0.000534412
52462	102	39043	Ohio	Erie County	-554.762	-1250.76	-494.833	-1115.33	151.662	341.935	135.278	304.91		0.00015297	0.000152381	0.00015289	0.000152345	0.000153053	0.000152463	0.000152973	0.000152427		0.152688	0.000308219
53139	779	6063	California	Plumas County	-554.292	-1250	-494.221	-1114.26	151.532	341.724	135.11	304.614		0.000152841	0.000152288	0.000152701	0.000152198	0.000152921	0.000152369	0.000152782	0.000152279		0.152548	0.00029207
53838	1478	18019	Indiana	Clark County	-552.182	-1251.28	-492.729	-1116.09	150.956	342.077	134.703	305.117		0.000152259	0.000152444	0.00015224	0.000152448	0.000152341	0.000152527	0.000152322	0.000152531		0.152389	0.000114368
54906	2546	55095	Wisconsin	Polk County	-553.447	-1247.56	-493.648	-1112.33	151.301	341.059	134.953	304.089		0.000152607	0.000151991	0.000152524	0.000151935	0.000152689	0.000152073	0.000152605	0.000152017		0.152305	0.000327127
55358	2998	42039	Pennsylvania	Crawford County	-552.689	-1248.64	-492.992	-1113.56	151.095	341.355	134.775	304.426		0.000152398	0.000152122	0.000152321	0.000152102	0.000152481	0.000152205	0.000152404	0.000152185		0.152277	0.000142576
53933	1573	26041	Michigan	Delta County	-552.355	-1249.14	-492.637	-1114	151.003	341.491	134.677	304.545		0.000152306	0.000152184	0.000152212	0.000152163	0.000152388	0.000152266	0.000152293	0.000152245		0.152257	7.32072e-05
54244	1884	48227	Texas	Howard County	-551.596	-1249.2	-492.123	-1114.04	150.795	341.507	134.537	304.557		0.000152097	0.000152191	0.000152053	0.000152169	0.000152178	0.000152273	0.000152134	0.00015225		0.152168	7.35084e-05
54388	2028	17093	Illinois	Kendall County	-552.558	-1243.38	-493.935	-1110.26	151.059	339.915	135.032	303.523		0.000152362	0.000151481	0.000152613	0.000151652	0.000152444	0.000151563	0.000152695	0.000151734		0.152068	0.000507432
54658	2298	26037	Michigan	Clinton County	-550.292	-1248.18	-491.043	-1113.26	150.439	341.229	134.242	304.343		0.000151737	0.000152066	0.000151719	0.000152062	0.000151819	0.000152149	0.000151801	0.000152144		0.151937	0.000184958
54592	2232	19149	Iowa	Plymouth County	-551.827	-1243.62	-492.253	-1109.05	150.858	339.98	134.572	303.192		0.000152161	0.000151511	0.000152093	0.000151488	0.000152242	0.000151592	0.000152174	0.000151568		0.151853	0.000339397
54245	1885	35029	New Mexico	Luna County	-549.943	-1247.65	-490.537	-1112.57	150.342	341.079	134.102	304.151		0.000151641	0.000152002	0.000151563	0.000151968	0.000151721	0.000152082	0.000151642	0.000152048		0.151833	0.000211517
54773	2413	30021	Montana	Dawson County	-549.553	-1244.82	-490.173	-1110.04	150.235	340.306	134.002	303.459		0.000151534	0.000151657	0.00015145	0.000151622	0.000151613	0.000151737	0.00015153	0.000151702		0.151606	9.60444e-05
54246	1886	24013	Maryland	Carroll County	-550.297	-1242.84	-490.949	-1108.48	150.441	339.769	134.217	303.038		0.000151739	0.000151415	0.00015169	0.000151409	0.000151821	0.000151498	0.000151772	0.000151491		0.151604	0.000168457
53036	676	37089	North Carolina	Henderson County	-549.966	-1241.81	-490.425	-1107.21	150.351	339.488	134.073	302.69		0.000151648	0.00015129	0.000151528	0.000151235	0.00015173	0.000151373	0.00015161	0.000151317		0.151466	0.000186046
53348	988	26015	Michigan	Barry County	-548.35	-1238.72	-489.17	-1104.67	149.908	338.642	133.73	301.996		0.000151202	0.000150914	0.00015114	0.000150889	0.000151283	0.000150995	0.000151222	0.000150971		0.151077	0.000152676
53839	1479	28121	Mississippi	Rankin County	-547.594	-1237.29	-489.03	-1104.05	149.702	338.253	133.692	301.828		0.000150994	0.00015074	0.000151097	0.000150805	0.000151075	0.000150822	0.000151179	0.000150887		0.15095	0.000159182
53140	780	6015	California	Del Norte County	-546.417	-1233.11	-487.332	-1099.29	149.38	337.108	133.227	300.525		0.000150669	0.00015023	0.000150573	0.000150154	0.00015075	0.000150311	0.000150653	0.000150235		0.150447	0.0002377
55109	2749	35047	New Mexico	San Miguel County	-543.005	-1236.7	-484.399	-1102.89	148.446	338.088	132.424	301.507		0.000149728	0.000150668	0.000149666	0.000150646	0.000149807	0.000150748	0.000149745	0.000150726		0.150217	0.000515649
54705	2345	53037	Washington	Kittitas County	-541.447	-1227.29	-483.231	-1094.6	148.02	335.516	132.105	299.242		0.000149299	0.000149521	0.000149305	0.000149513	0.000149378	0.000149601	0.000149385	0.000149593		0.14945	0.000122939
54003	1643	36093	New York	Schenectady County	-541.119	-1223.2	-482.744	-1090.94	147.932	334.401	131.974	298.243		0.000149208	0.000149023	0.000149155	0.000149013	0.000149289	0.000149104	0.000149236	0.000149094		0.14914	9.94822e-05
52759	399	27005	Minnesota	Becker County	-541.892	-1221.5	-483.33	-1089.15	148.142	333.932	132.132	297.75		0.000149421	0.000148816	0.000149336	0.000148768	0.000149501	0.000148895	0.000149416	0.000148848		0.149125	0.000318688
53934	1574	19179	Iowa	Wapello County	-540.595	-1220.09	-482.184	-1087.93	147.788	333.547	131.819	297.418		0.000149064	0.000148644	0.000148982	0.000148602	0.000149143	0.000148724	0.000149062	0.000148682		0.148863	0.000220622
54004	1644	20051	Kansas	Ellis County	-538.072	-1219.02	-480.155	-1087.16	147.098	333.255	131.264	297.208		0.000148368	0.000148514	0.000148355	0.000148497	0.000148447	0.000148593	0.000148434	0.000148577		0.148473	8.83123e-05
54907	2547	27021	Minnesota	Cass County	-538.943	-1215.32	-480.682	-1083.65	147.336	332.244	131.408	296.249		0.000148608	0.000148063	0.000148518	0.000148018	0.000148687	0.000148142	0.000148597	0.000148097		0.148341	0.000284964
54706	2346	42073	Pennsylvania	Lawrence County	-537.091	-1214.27	-479.018	-1082.85	146.831	331.96	130.955	296.031		0.000148097	0.000147935	0.000148004	0.000147908	0.000148177	0.000148016	0.000148084	0.000147988		0.148026	8.89934e-05
54128	1768	27019	Minnesota	Carver County	-537.107	-1211.31	-479.752	-1080.95	146.834	331.146	131.154	295.508		0.000148102	0.000147574	0.00014823	0.000147648	0.000148181	0.000147653	0.000148309	0.000147727		0.147928	0.00030492
53039	679	45013	South Carolina	Beaufort County	-536.112	-1212.5	-478.38	-1081.58	146.563	331.475	130.78	295.683		0.000147827	0.000147719	0.000147807	0.000147734	0.000147908	0.000147799	0.000147887	0.000147815		0.147812	6.53732e-05
53454	1094	10001	Delaware	Kent County	-535.511	-1213.71	-477.851	-1082.5	146.399	331.805	130.636	295.937		0.000147662	0.000147866	0.000147643	0.000147861	0.000147742	0.000147947	0.000147723	0.000147942		0.147798	0.000121095
52940	580	1015	Alabama	Calhoun County	-534.795	-1213.28	-477.052	-1081.86	146.203	331.688	130.417	295.76		0.000147464	0.000147814	0.000147396	0.000147772	0.000147544	0.000147895	0.000147476	0.000147853		0.147652	0.000201083
54908	2548	56019	Wyoming	Johnson County	-535.788	-1207.24	-477.908	-1076.38	146.472	330.032	130.649	294.257		0.000147738	0.000147079	0.000147661	0.000147025	0.000147815	0.000147156	0.000147738	0.000147102		0.147414	0.00035038
53037	677	40147	Oklahoma	Washington County	-533.703	-1205.91	-476.097	-1075.43	145.904	329.673	130.156	294.001		0.000147163	0.000146917	0.000147101	0.000146895	0.000147242	0.000146996	0.00014718	0.000146973		0.147058	0.00013059
52760	400	46011	South Dakota	Brookings County	-530.759	-1210.93	-474.007	-1080.71	145.098	331.042	129.584	295.444		0.000146352	0.000147528	0.000146456	0.000147616	0.000146429	0.000147606	0.000146533	0.000147695		0.147027	0.0006283
53038	678	49019	Utah	Grand County	-533.472	-1203.83	-475.92	-1073.4	145.835	329.091	130.102	293.434		0.0001471	0.000146663	0.000147046	0.000146617	0.000147173	0.000146736	0.00014712	0.00014669		0.146893	0.000236297
53141	781	19167	Iowa	Sioux County	-532.436	-1202.88	-475.26	-1073.15	145.557	328.843	129.926	293.376		0.000146814	0.000146548	0.000146843	0.000146583	0.000146892	0.000146626	0.000146921	0.000146661		0.146736	0.00014758
53233	873	20113	Kansas	McPherson County	-533.217	-1201.66	-475.53	-1071.33	145.771	328.51	130	292.88		0.000147029	0.000146399	0.000146926	0.000146335	0.000147108	0.000146477	0.000147005	0.000146413		0.146712	0.000332426
54774	2414	44003	Rhode Island	Kent County	-531.296	-1199.77	-473.852	-1069.82	145.247	327.995	129.542	292.47		0.0001465	0.000146168	0.000146408	0.000146129	0.000146579	0.000146248	0.000146487	0.000146208		0.146341	0.000172626
53935	1575	8015	Colorado	Chaffee County	-529.827	-1195.34	-472.54	-1065.8	144.842	326.777	129.181	291.363		0.000146095	0.000145629	0.000146002	0.000145579	0.00014617	0.000145705	0.000146078	0.000145655		0.145864	0.00024419
54389	2029	8087	Colorado	Morgan County	-527.548	-1191.9	-470.718	-1062.95	144.22	325.837	128.684	290.585		0.000145466	0.000145209	0.000145439	0.00014519	0.000145542	0.000145286	0.000145516	0.000145266		0.145364	0.000141918
52385	25	1077	Alabama	Lauderdale County	-527.389	-1191.83	-470.482	-1062.87	144.178	325.824	128.621	290.568		0.000145422	0.000145201	0.000145366	0.000145178	0.000145501	0.00014528	0.000145445	0.000145257		0.145331	0.00011924
52761	401	19057	Iowa	Des Moines County	-527.711	-1190.26	-470.681	-1061.36	144.266	325.393	128.675	290.154		0.000145511	0.000145009	0.000145428	0.000144972	0.000145589	0.000145087	0.000145506	0.00014505		0.145269	0.000261463
52939	579	26123	Michigan	Newaygo County	-525.641	-1188.85	-468.908	-1060.26	143.7	325.01	128.19	289.854		0.00014494	0.000144839	0.00014488	0.000144822	0.000145018	0.000144917	0.000144958	0.000144901		0.144909	6.40826e-05
53840	1480	48259	Texas	Kendall County	-525.143	-1185.93	-468.331	-1057.41	143.564	324.21	128.033	289.077		0.000144803	0.000144482	0.000144702	0.000144434	0.000144881	0.00014456	0.00014478	0.000144512		0.144644	0.00016833
54775	2415	20161	Kansas	Riley County	-521.865	-1190.73	-466.292	-1062.58	142.667	325.521	127.475	290.488		0.000143899	0.000145067	0.000144072	0.000145139	0.000143976	0.000145145	0.000144149	0.000145217		0.144583	0.000603335
52525	165	27169	Minnesota	Winona County	-522.1	-1181.06	-465.875	-1053.33	142.732	322.877	127.361	287.959		0.000143964	0.000143888	0.000143943	0.000143876	0.000144041	0.000143966	0.00014402	0.000143953		0.143956	5.68269e-05
53040	680	17117	Illinois	Macoupin County	-520.801	-1176.38	-464.571	-1049.14	142.377	321.6	127.005	286.816		0.000143606	0.000143319	0.00014354	0.000143304	0.000143683	0.000143396	0.000143617	0.000143382		0.143481	0.000147763
53142	782	42027	Pennsylvania	Centre County	-518.717	-1174.34	-462.979	-1047.51	141.808	321.043	126.57	286.371		0.000143031	0.000143071	0.000143048	0.000143081	0.000143108	0.000143148	0.000143126	0.000143159		0.143097	4.64479e-05
54167	1807	27099	Minnesota	Mower County	-519.324	-1171.13	-463.228	-1044.27	141.972	320.164	126.637	285.483		0.000143198	0.00014268	0.000143125	0.000142639	0.000143275	0.000142756	0.000143201	0.000142715		0.142949	0.000273376
54390	2030	28081	Mississippi	Lee County	-517.75	-1172.63	-461.989	-1045.78	141.543	320.577	126.299	285.898		0.000142764	0.000142862	0.000142742	0.000142845	0.000142842	0.00014294	0.000142819	0.000142923		0.142842	6.87767e-05
54478	2118	46035	South Dakota	Davison County	-517.121	-1170.42	-461.458	-1044.08	141.37	319.967	126.153	285.429		0.000142591	0.000142592	0.000142578	0.000142613	0.000142666	0.000142668	0.000142654	0.000142689		0.142631	4.25585e-05
54593	2233	40145	Oklahoma	Wagoner County	-517.011	-1170.07	-461.574	-1043.98	141.341	319.875	126.185	285.403		0.000142561	0.000142551	0.000142614	0.000142599	0.000142637	0.000142627	0.000142691	0.000142676		0.142619	4.96265e-05
52590	230	51015	Virginia	Augusta County	-515.972	-1166.29	-460.28	-1040.1	141.057	318.842	125.832	284.345		0.000142274	0.000142089	0.000142214	0.000142069	0.000142351	0.000142167	0.000142291	0.000142147		0.1422	0.000100118
53577	1217	48005	Texas	Angelina County	-515.463	-1165.81	-459.977	-1039.77	140.918	318.712	125.749	284.254		0.000142134	0.000142032	0.000142121	0.000142024	0.00014221	0.000142109	0.000142197	0.000142101		0.142116	6.73073e-05
54909	2549	27047	Minnesota	Freeborn County	-516.148	-1163.38	-460.291	-1037.23	141.104	318.044	125.834	283.557		0.000142323	0.000141735	0.000142218	0.000141677	0.000142398	0.000141811	0.000142294	0.000141753		0.142026	0.000307681
53841	1481	56043	Wyoming	Washakie County	-516.162	-1162.76	-460.433	-1036.73	141.106	317.871	125.871	283.416		0.000142326	0.00014166	0.000142261	0.000141608	0.0001424	0.000141734	0.000142335	0.000141682		0.142001	0.000356256
54910	2550	26149	Michigan	St. Joseph County	-513.913	-1164.13	-458.462	-1038.27	140.494	318.251	125.335	283.844		0.000141706	0.000141827	0.000141652	0.000141819	0.000141783	0.000141903	0.000141729	0.000141896		0.141789	8.94372e-05
52591	231	40041	Oklahoma	Delaware County	-513.785	-1164.35	-458.277	-1038.33	140.459	318.311	125.284	283.859		0.000141671	0.000141854	0.000141595	0.000141827	0.000141747	0.00014193	0.000141671	0.000141903		0.141775	0.000121879
53143	783	46135	South Dakota	Yankton County	-514.221	-1162.41	-458.919	-1037.05	140.577	317.777	125.459	283.508		0.000141791	0.000141617	0.000141794	0.000141653	0.000141866	0.000141692	0.000141869	0.000141728		0.141751	9.44047e-05
54543	2183	51550	Virginia	Chesapeake city	-513.942	-1160.3	-458.745	-1035.06	140.503	317.205	125.413	282.967		0.000141714	0.00014136	0.00014174	0.000141381	0.000141791	0.000141437	0.000141817	0.000141458		0.141587	0.000195533
52463	103	16007	Idaho	Bear Lake County	-513.492	-1157.88	-458.072	-1032.62	140.374	316.533	125.224	282.289		0.00014159	0.000141066	0.000141532	0.000141047	0.000141662	0.000141137	0.000141604	0.000141119		0.141345	0.000273565
52664	304	56015	Wyoming	Goshen County	-513.07	-1158.63	-457.589	-1032.96	140.261	316.742	125.094	282.387		0.000141474	0.000141156	0.000141383	0.000141093	0.000141548	0.00014123	0.000141457	0.000141167		0.141314	0.000172207
53743	1383	55019	Wisconsin	Clark County	-511.811	-1158.9	-456.65	-1033.89	139.919	316.82	124.839	282.646		0.000141127	0.000141189	0.000141093	0.000141221	0.000141202	0.000141265	0.000141168	0.000141297		0.141195	6.76326e-05
54005	1645	9007	Connecticut	Middlesex County	-512.337	-1156.82	-457.152	-1032	140.064	316.254	124.977	282.13		0.000141272	0.000140936	0.000141248	0.000140963	0.000141348	0.000141013	0.000141324	0.000141039		0.141143	0.000171392
54707	2347	46005	South Dakota	Beadle County	-511.453	-1155.24	-456.301	-1030.4	139.82	315.818	124.743	281.69		0.000141028	0.000140744	0.000140985	0.000140744	0.000141103	0.000140818	0.000141059	0.000140819		0.140913	0.000146804
54479	2119	41009	Oregon	Columbia County	-511.53	-1155.2	-456.266	-1030.1	139.842	315.809	124.734	281.608		0.000141049	0.000140738	0.000140974	0.000140703	0.000141125	0.000140814	0.00014105	0.000140778		0.140904	0.000163849
54708	2348	27049	Minnesota	Goodhue County	-511.382	-1152.8	-456.164	-1027.97	139.801	315.153	124.706	281.026		0.000141008	0.000140446	0.000140943	0.000140412	0.000141084	0.000140522	0.000141018	0.000140487		0.14074	0.00029613
54911	2551	29091	Missouri	Howell County	-506.607	-1151.35	-451.872	-1026.73	138.497	314.756	123.533	280.688		0.000139692	0.000140269	0.000139616	0.000140243	0.000139767	0.000140345	0.000139692	0.000140319		0.139993	0.000325725
54912	2552	19125	Iowa	Marion County	-507.344	-1144.88	-452.605	-1021.01	138.698	312.986	123.733	279.122		0.000139895	0.000139481	0.000139843	0.000139461	0.00013997	0.000139556	0.000139917	0.000139536		0.139707	0.000217521
55172	2812	48053	Texas	Burnet County	-506.22	-1145.23	-451.596	-1021.33	138.391	313.085	123.458	279.213		0.000139585	0.000139524	0.000139531	0.000139505	0.00013966	0.0001396	0.000139606	0.000139581		0.139574	5.11154e-05
54327	1967	48427	Texas	Starr County	-502.344	-1148.54	-448.799	-1025.64	137.331	313.989	122.693	280.391		0.000138516	0.000139927	0.000138667	0.000140094	0.000138591	0.000140003	0.000138741	0.00014017		0.139339	0.000764694
53144	784	21015	Kentucky	Boone County	-505.279	-1140.82	-451.245	-1018.22	138.134	311.878	123.362	278.362		0.000139326	0.000138986	0.000139423	0.00013908	0.000139401	0.000139062	0.000139498	0.000139155		0.139241	0.000193365
53234	874	36117	New York	Wayne County	-505.005	-1139.13	-450.513	-1015.84	138.059	311.418	123.162	277.713		0.00013925	0.000138781	0.000139197	0.000138756	0.000139325	0.000138856	0.000139272	0.000138831		0.139034	0.000247467
53578	1218	36045	New York	Jefferson County	-503.744	-1138.48	-449.621	-1015.59	137.714	311.241	122.918	277.644		0.000138902	0.000138702	0.000138921	0.000138721	0.000138977	0.000138777	0.000138996	0.000138796		0.138849	0.000114627
54776	2416	19111	Iowa	Lee County	-504.225	-1137.31	-449.698	-1014.07	137.845	310.918	122.939	277.227		0.000139035	0.000138559	0.000138945	0.000138514	0.000139109	0.000138633	0.000139019	0.000138588		0.1388	0.000248628
54659	2299	48291	Texas	Liberty County	-501.329	-1139.99	-447.446	-1017.17	137.054	311.652	122.323	278.076		0.000138237	0.000138886	0.000138249	0.000138937	0.000138311	0.000138961	0.000138324	0.000139013		0.138615	0.000360377
54913	2553	12117	Florida	Seminole County	-502.742	-1136.1	-448.68	-1013.28	137.441	310.59	122.661	277.014		0.000138626	0.000138412	0.00013863	0.000138406	0.000138701	0.000138487	0.000138706	0.000138482		0.138556	0.000123888
55173	2813	46065	South Dakota	Hughes County	-501.854	-1132.83	-447.898	-1010.64	137.196	309.691	122.446	276.287		0.000138381	0.000138013	0.000138389	0.000138045	0.000138454	0.000138086	0.000138462	0.000138118		0.138244	0.000194602
52650	290	48325	Texas	Medina County	-500.241	-1133.79	-446.363	-1011.23	136.756	309.956	122.027	276.45		0.000137936	0.00013813	0.000137914	0.000138125	0.000138011	0.000138205	0.000137989	0.0001382		0.138064	0.000115565
54328	1968	47119	Tennessee	Maury County	-500.072	-1132.36	-446.241	-1010.07	136.71	309.566	121.994	276.135		0.00013789	0.000137956	0.000137877	0.000137967	0.000137964	0.000138031	0.000137951	0.000138042		0.13796	5.83274e-05
52665	305	30083	Montana	Richland County	-498.239	-1128.13	-444.501	-1006.12	136.207	308.405	121.517	275.05		0.000137384	0.00013744	0.000137339	0.000137427	0.000137457	0.000137513	0.000137411	0.0001375		0.137434	5.76221e-05
54006	1646	18053	Indiana	Grant County	-498.443	-1127.44	-444.641	-1005.48	136.265	308.221	121.556	274.88		0.000137441	0.000137356	0.000137382	0.000137341	0.000137515	0.000137431	0.000137456	0.000137415		0.137417	5.67404e-05
55299	2939	47011	Tennessee	Bradley County	-497.74	-1125.54	-444.13	-1003.99	136.073	307.703	121.417	274.472		0.000137247	0.000137125	0.000137224	0.000137137	0.000137321	0.0001372	0.000137299	0.000137211		0.13722	6.92862e-05
52762	402	26155	Michigan	Shiawassee County	-495.794	-1122.4	-442.336	-1001.11	135.54	306.841	120.926	273.685		0.00013671	0.000136742	0.00013667	0.000136743	0.000136784	0.000136816	0.000136743	0.000136817		0.136753	5.07903e-05
53659	1299	54011	West Virginia	Cabell County	-495.04	-1123.59	-441.626	-1002.11	135.335	307.169	120.732	273.957		0.000136502	0.000136888	0.000136451	0.000136879	0.000136576	0.000136962	0.000136524	0.000136954		0.136717	0.000222084
54007	1647	30087	Montana	Rosebud County	-495.093	-1120.61	-441.845	-999.545	135.347	306.35	120.79	273.252		0.000136517	0.000136525	0.000136518	0.000136529	0.000136588	0.000136597	0.00013659	0.000136601		0.136558	3.86298e-05
55359	2999	36015	New York	Chemung County	-494.573	-1115.81	-441.156	-995.002	135.207	305.043	120.604	272.015		0.000136374	0.00013594	0.000136305	0.000135909	0.000136447	0.000136014	0.000136379	0.000135983		0.136169	0.000227074
52592	232	19139	Iowa	Muscatine County	-493.356	-1113.18	-440.177	-992.781	134.874	304.321	120.336	271.407		0.000136038	0.000135619	0.000136003	0.000135606	0.000136111	0.000135692	0.000136076	0.000135678		0.135853	0.000222115
54129	1769	34011	New Jersey	Cumberland County	-492.021	-1115.8	-438.918	-995.092	134.51	305.04	119.992	272.04		0.00013567	0.000135939	0.000135614	0.000135921	0.000135743	0.000136013	0.000135688	0.000135995		0.135823	0.000160546
53235	875	46019	South Dakota	Butte County	-492.702	-1112.45	-439.586	-992.235	134.694	304.118	120.173	271.255		0.000135858	0.00013553	0.00013582	0.000135531	0.000135929	0.000135601	0.000135892	0.000135602		0.13572	0.000169855
54914	2554	17077	Illinois	Jackson County	-488.802	-1113.68	-436.163	-993.344	133.629	304.457	119.239	271.561		0.000134782	0.000135679	0.000134763	0.000135682	0.000134855	0.000135753	0.000134835	0.000135756		0.135263	0.000487447
52763	403	42075	Pennsylvania	Lebanon County	-490.54	-1107.37	-437.498	-987.358	134.105	302.736	119.604	269.926		0.000135261	0.000134912	0.000135175	0.000134865	0.000135335	0.000134985	0.000135248	0.000134938		0.13509	0.00018443
55360	3000	37129	North Carolina	New Hanover County	-489.165	-1109.09	-436.466	-989.058	133.729	303.206	119.322	270.391		0.000134882	0.000135121	0.000134856	0.000135097	0.000134956	0.000135195	0.00013493	0.000135171		0.135026	0.000134755
53527	1167	48001	Texas	Anderson County	-487.904	-1109.01	-435.268	-989.157	133.384	303.183	118.994	270.417		0.000134535	0.000135112	0.000134486	0.000135111	0.000134607	0.000135185	0.000134559	0.000135184		0.134847	0.000324146
54660	2300	12005	Florida	Bay County	-488.2	-1105.09	-435.583	-985.436	133.465	302.11	119.081	269.4		0.000134616	0.000134633	0.000134584	0.000134602	0.000134689	0.000134706	0.000134657	0.000134676		0.134645	4.36685e-05
52764	404	34037	New Jersey	Sussex County	-488.714	-1103.42	-436.027	-984.093	133.606	301.655	119.202	269.033		0.000134758	0.00013443	0.000134721	0.000134419	0.000134831	0.000134503	0.000134794	0.000134492		0.134618	0.000173421
52593	233	37057	North Carolina	Davidson County	-487.974	-1103.39	-435.349	-984.112	133.403	301.647	119.017	269.038		0.000134554	0.000134427	0.000134511	0.000134421	0.000134627	0.0001345	0.000134584	0.000134495		0.134515	7.16852e-05
52765	405	17057	Illinois	Fulton County	-487.291	-1100.52	-434.657	-981.455	133.216	300.86	118.827	268.31		0.000134366	0.000134076	0.000134297	0.000134058	0.000134438	0.000134149	0.000134369	0.000134131		0.134236	0.000148713
52941	581	55083	Wisconsin	Oconto County	-487.598	-1099.25	-434.952	-980.153	133.3	300.513	118.907	267.955		0.00013445	0.000133922	0.000134389	0.000133881	0.000134522	0.000133994	0.000134461	0.000133953		0.134196	0.000280965
53236	876	24043	Maryland	Washington County	-487.236	-1099.49	-434.682	-980.543	133.201	300.58	118.834	268.062		0.00013435	0.000133951	0.000134305	0.000133934	0.000134423	0.000134024	0.000134378	0.000134007		0.134171	0.00021035
53660	1300	48099	Texas	Coryell County	-486.982	-1098.4	-435.131	-980.589	133.132	300.283	118.956	268.074		0.00013428	0.000133819	0.000134444	0.00013394	0.000134353	0.000133891	0.000134516	0.000134013		0.134157	0.000271866
53842	1482	48143	Texas	Erath County	-484.965	-1102.57	-432.758	-983.437	132.58	301.42	118.308	268.853		0.000133724	0.000134326	0.000133711	0.000134329	0.000133796	0.000134399	0.000133783	0.000134402		0.134059	0.000328665
54008	1648	40021	Oklahoma	Cherokee County	-484.008	-1103.7	-431.863	-984.323	132.318	301.731	118.063	269.095		0.00013346	0.000134465	0.000133434	0.00013445	0.000133532	0.000134537	0.000133506	0.000134523		0.133988	0.000541692
54076	1716	39119	Ohio	Muskingum County	-485.142	-1094.68	-432.834	-976.333	132.629	299.265	118.329	266.911		0.000133773	0.000133365	0.000133734	0.000133359	0.000133845	0.000133437	0.000133806	0.000133431		0.133594	0.000213349
54544	2184	55069	Wisconsin	Lincoln County	-484.861	-1091.81	-432.455	-973.425	132.551	298.479	118.224	266.115		0.000133695	0.000133016	0.000133617	0.000132962	0.000133767	0.000133087	0.000133688	0.000133033		0.133358	0.000360656
54709	2349	27017	Minnesota	Carlton County	-481.136	-1084.53	-429.136	-966.98	131.533	296.49	117.317	264.353		0.000132668	0.000132129	0.000132592	0.000132081	0.000132739	0.0001322	0.000132662	0.000132152		0.132403	0.000285057
55260	2900	39157	Ohio	Tuscarawas County	-480.381	-1084.73	-428.565	-967.461	131.327	296.546	117.162	264.486		0.00013246	0.000132154	0.000132415	0.000132147	0.000132532	0.000132225	0.000132487	0.000132219		0.13233	0.000159233
55361	3001	41013	Oregon	Crook County	-480.523	-1083.13	-428.529	-965.645	131.365	296.106	117.151	263.987		0.000132499	0.000131958	0.000132404	0.000131899	0.00013257	0.000132029	0.000132475	0.00013197		0.132225	0.000285286
52464	104	48277	Texas	Lamar County	-478.538	-1082.47	-426.83	-965.126	130.823	295.928	116.687	263.847		0.000131952	0.000131878	0.000131879	0.000131828	0.000132023	0.00013195	0.00013195	0.000131899		0.13192	6.06133e-05
53041	681	21145	Kentucky	McCracken County	-478.426	-1081.59	-426.817	-964.739	130.793	295.686	116.684	263.741		0.000131921	0.000131771	0.000131875	0.000131775	0.000131992	0.000131842	0.000131946	0.000131847		0.131871	7.88837e-05
53145	785	20057	Kansas	Ford County	-478.121	-1081.34	-426.928	-964.664	130.708	295.617	116.713	263.719		0.000131837	0.000131741	0.00013191	0.000131765	0.000131907	0.000131811	0.00013198	0.000131835		0.131848	7.99269e-05
55110	2750	37097	North Carolina	Iredell County	-475.521	-1078.03	-424.351	-961.67	129.999	294.713	116.01	262.903		0.00013112	0.000131337	0.000131113	0.000131356	0.000131191	0.000131408	0.000131184	0.000131427		0.131267	0.000128843
53546	1186	31047	Nebraska	Dawson County	-476.257	-1074.51	-424.963	-958.272	130.198	293.748	116.176	261.971		0.000131323	0.000130908	0.000131302	0.000130892	0.000131393	0.000130978	0.000131372	0.000130962		0.131141	0.000223946
54009	1649	22001	Louisiana	Acadia Parish	-473.688	-1078.15	-422.647	-961.467	129.498	294.745	115.544	262.847		0.000130615	0.000131351	0.000130587	0.000131328	0.000130685	0.000131422	0.000130657	0.0001314		0.131006	0.000397231
53843	1483	46113	South Dakota	Shannon County	-464.846	-1095.4	-414.81	-976.739	127.079	299.457	113.4	267.019		0.000128177	0.000133453	0.000128165	0.000133414	0.000128244	0.000133523	0.000128233	0.000133485		0.130837	0.00281405
54329	1969	16067	Idaho	Minidoka County	-474.477	-1071.17	-423.256	-955.187	129.71	292.83	115.708	261.124		0.000130832	0.000130501	0.000130775	0.00013047	0.0001309	0.000130568	0.000130843	0.000130538		0.130678	0.000175485
55362	3002	12061	Florida	Indian River County	-473.952	-1069.73	-422.595	-953.67	129.57	292.447	115.53	260.717		0.000130687	0.000130326	0.000130571	0.000130263	0.000130759	0.000130397	0.000130642	0.000130334		0.130497	0.000189397
52942	582	24027	Maryland	Howard County	-474.548	-1067.26	-423.708	-952.098	129.733	291.77	115.834	260.286		0.000130852	0.000130025	0.000130914	0.000130049	0.000130923	0.000130096	0.000130985	0.000130119		0.130495	0.00045467
54247	1887	18085	Indiana	Kosciusko County	-473.272	-1070.25	-422.393	-954.796	129.384	292.587	115.474	261.023		0.0001305	0.000130389	0.000130508	0.000130417	0.00013057	0.00013046	0.000130579	0.000130488		0.130489	6.66218e-05
54248	1888	39055	Ohio	Geauga County	-472.765	-1066.02	-421.736	-950.63	129.245	291.429	115.295	259.884		0.00013036	0.000129873	0.000130305	0.000129848	0.000130431	0.000129944	0.000130375	0.000129918		0.130132	0.000256067
54168	1808	16017	Idaho	Bonner County	-472.311	-1066.54	-421.313	-951.17	129.121	291.571	115.179	260.031		0.000130235	0.000129937	0.000130174	0.000129922	0.000130305	0.000130007	0.000130244	0.000129992		0.130102	0.000153654
52666	306	5009	Arkansas	Boone County	-471.183	-1067.8	-420.352	-952.314	128.812	291.916	114.916	260.344		0.000129924	0.000130091	0.000129878	0.000130078	0.000129994	0.000130161	0.000129947	0.000130148		0.130028	0.000106668
54915	2555	27025	Minnesota	Chisago County	-471.6	-1064.52	-420.86	-949.449	128.926	291.019	115.055	259.56		0.000130039	0.000129691	0.000130035	0.000129687	0.000130108	0.000129761	0.000130104	0.000129756		0.129898	0.000189592
54777	2417	27009	Minnesota	Benton County	-470.638	-1062.46	-419.895	-947.412	128.663	290.454	114.791	259.003		0.000129774	0.00012944	0.000129736	0.000129409	0.000129843	0.000129509	0.000129805	0.000129478		0.129624	0.000181536
52594	234	56009	Wyoming	Converse County	-470.256	-1060.7	-419.724	-946.061	128.557	289.97	114.742	258.631		0.000129668	0.000129226	0.000129683	0.000129224	0.000129736	0.000129293	0.000129751	0.000129292		0.129484	0.00024385
52766	406	22045	Louisiana	Iberia Parish	-468.163	-1065.33	-417.802	-950.176	127.987	291.242	114.22	259.761		0.000129091	0.00012979	0.00012909	0.000129786	0.000129161	0.00012986	0.00012916	0.000129857		0.129474	0.000374782
53455	1095	1095	Alabama	Marshall County	-469.066	-1061.06	-418.458	-946.187	128.234	290.075	114.399	258.67		0.00012934	0.000129269	0.000129292	0.000129241	0.00012941	0.00012934	0.000129363	0.000129311		0.129321	5.39192e-05
53456	1096	27015	Minnesota	Brown County	-469.878	-1059.31	-419.049	-944.469	128.455	289.593	114.559	258.198		0.000129564	0.000129056	0.000129475	0.000129007	0.000129633	0.000129125	0.000129544	0.000129075		0.12931	0.000266368
53457	1097	47053	Tennessee	Gibson County	-468.955	-1061.12	-418.274	-946.228	128.204	290.089	114.348	258.681		0.00012931	0.000129276	0.000129235	0.000129247	0.000129379	0.000129346	0.000129305	0.000129317		0.129302	4.83769e-05
54916	2556	37035	North Carolina	Catawba County	-468.759	-1059.5	-418.185	-944.87	128.15	289.648	114.324	258.31		0.000129255	0.000129079	0.000129208	0.000129061	0.000129325	0.000129149	0.000129278	0.000129131		0.129186	9.59801e-05
53579	1219	12086	Florida	Miami-Dade County	-466.893	-1057.45	-416.664	-943.293	127.583	288.958	113.857	257.763		0.000128741	0.00012883	0.000128738	0.000128846	0.000128753	0.000128842	0.00012875	0.000128858		0.128795	5.33384e-05
55363	3003	26067	Michigan	Ionia County	-467.248	-1054.55	-417.026	-940.666	127.737	288.295	114.007	257.16		0.000128839	0.000128477	0.00012885	0.000128487	0.000128908	0.000128546	0.000128919	0.000128557		0.128698	0.000197323
52767	407	48171	Texas	Gillespie County	-466.834	-1054.25	-416.254	-939.966	127.624	288.211	113.796	256.969		0.000128725	0.000128439	0.000128611	0.000128391	0.000128794	0.000128509	0.000128681	0.000128461		0.128576	0.000147553
54917	2557	5085	Arkansas	Lonoke County	-464.036	-1053.71	-414.2	-939.987	126.859	288.065	113.234	256.975		0.000127953	0.000128374	0.000127977	0.000128394	0.000128022	0.000128443	0.000128046	0.000128464		0.128209	0.000227551
54130	1770	12015	Florida	Charlotte County	-463.873	-1048.46	-413.593	-934.784	126.815	286.629	113.069	255.553		0.000127908	0.000127734	0.000127789	0.000127684	0.000127978	0.000127803	0.000127859	0.000127753		0.127813	9.6722e-05
54330	1970	26027	Michigan	Cass County	-463.975	-1047.83	-413.847	-934.363	126.842	286.456	113.138	255.437		0.000127936	0.000127657	0.000127868	0.000127626	0.000128005	0.000127726	0.000127937	0.000127695		0.127806	0.000146703
52943	583	5115	Arkansas	Pope County	-462.38	-1050.5	-412.679	-937.099	126.406	287.187	112.819	256.185		0.000127497	0.000127983	0.000127507	0.000128	0.000127565	0.000128052	0.000127576	0.000128069		0.127781	0.000264609
54249	1889	37001	North Carolina	Alamance County	-463.202	-1048.87	-413.266	-935.445	126.631	286.742	112.979	255.733		0.000127723	0.000127784	0.000127688	0.000127774	0.000127792	0.000127854	0.000127757	0.000127843		0.127777	5.5817e-05
54661	2301	45003	South Carolina	Aiken County	-463.049	-1048.33	-413.123	-934.924	126.589	286.593	112.94	255.591		0.000127681	0.000127718	0.000127644	0.000127703	0.00012775	0.000127787	0.000127713	0.000127772		0.127721	4.7578e-05
53349	989	26073	Michigan	Isabella County	-459.959	-1047.65	-410.591	-934.767	125.744	286.407	112.248	255.547		0.000126829	0.000127635	0.000126862	0.000127681	0.000126897	0.000127704	0.00012693	0.00012775		0.127286	0.00043678
54710	2350	55029	Wisconsin	Door County	-462.412	-1042.06	-412.348	-929.023	126.414	284.878	112.728	253.977		0.000127506	0.000126954	0.000127404	0.000126897	0.000127574	0.000127023	0.000127473	0.000126965		0.127224	0.000288711
52944	584	40135	Oklahoma	Sequoyah County	-461.187	-1043.91	-411.424	-930.94	126.08	285.386	112.475	254.501		0.000127168	0.000127181	0.000127119	0.000127159	0.000127236	0.000127249	0.000127187	0.000127227		0.127191	4.40957e-05
53237	877	47035	Tennessee	Cumberland County	-459.614	-1040.68	-409.961	-928.222	125.65	284.504	112.076	253.759		0.000126734	0.000126787	0.000126667	0.000126787	0.000126803	0.000126856	0.000126735	0.000126856		0.126778	6.44071e-05
54918	2558	53075	Washington	Whitman County	-458.088	-1042.71	-408.891	-930.016	125.232	285.056	111.783	254.248		0.000126313	0.000127034	0.000126336	0.000127032	0.000126381	0.000127102	0.000126404	0.000127101		0.126713	0.000380558
52768	408	17007	Illinois	Boone County	-458.961	-1037.29	-409.672	-925.453	125.471	283.575	111.996	253.001		0.000126554	0.000126374	0.000126578	0.000126409	0.000126622	0.000126442	0.000126646	0.000126477		0.126513	0.000101369
52945	585	22113	Louisiana	Vermilion Parish	-458.485	-1037.68	-409.218	-925.605	125.342	283.682	111.873	253.044		0.000126423	0.000126421	0.000126437	0.00012643	0.000126491	0.000126489	0.000126506	0.000126499		0.126462	3.73219e-05
52526	166	17055	Illinois	Franklin County	-457.978	-1036.62	-408.443	-924.331	125.202	283.391	111.661	252.694		0.000126283	0.000126291	0.000126198	0.000126256	0.000126351	0.00012636	0.000126266	0.000126324		0.126291	5.33922e-05
52596	236	37019	North Carolina	Brunswick County	-457.952	-1036.75	-408.396	-924.284	125.196	283.429	111.648	252.683		0.000126276	0.000126308	0.000126183	0.000126249	0.000126344	0.000126377	0.000126252	0.000126318		0.126288	6.11779e-05
54920	2560	35045	New Mexico	San Juan County	-456.594	-1039.15	-407.651	-927.077	124.706	283.817	111.339	253.206		0.000125901	0.000126601	0.000125953	0.000126631	0.00012585	0.00012655	0.000125902	0.00012658		0.126246	0.000369739
52595	235	29027	Missouri	Callaway County	-456.042	-1038.67	-406.987	-926.422	124.673	283.953	111.262	253.266		0.000125749	0.000126542	0.000125748	0.000126541	0.000125816	0.00012661	0.000125816	0.00012661		0.126179	0.000425708
52769	409	48189	Texas	Hale County	-457.004	-1034.73	-407.866	-922.888	124.936	282.874	111.502	252.299		0.000126014	0.000126061	0.00012602	0.000126059	0.000126082	0.000126129	0.000126087	0.000126126		0.126072	4.28964e-05
53238	878	48299	Texas	Llano County	-457.728	-1033.2	-408.064	-921.116	125.134	282.458	111.557	251.816		0.000126214	0.000125876	0.000126081	0.000125817	0.000126282	0.000125944	0.000126149	0.000125885		0.126031	0.000173933
54594	2234	12073	Florida	Leon County	-455.768	-1033.11	-406.87	-921.506	124.599	282.435	111.231	251.923		0.000125673	0.000125865	0.000125712	0.00012587	0.000125742	0.000125933	0.00012578	0.000125939		0.125814	0.000101389
53042	682	40121	Oklahoma	Pittsburg County	-456.143	-1031.64	-406.889	-919.954	124.701	282.029	111.236	251.498		0.000125777	0.000125685	0.000125718	0.000125658	0.000125844	0.000125752	0.000125785	0.000125726		0.125743	5.96363e-05
54077	1717	45015	South Carolina	Berkeley County	-453.291	-1028.92	-404.66	-917.927	123.922	281.288	110.627	250.945		0.000124991	0.000125354	0.000125029	0.000125381	0.000125058	0.000125422	0.000125097	0.000125449		0.125223	0.000195493
53350	990	29023	Missouri	Butler County	-453.347	-1025.88	-404.338	-914.657	123.936	280.455	110.538	250.05		0.000125006	0.000124983	0.00012493	0.000124935	0.000125073	0.00012505	0.000124997	0.000125002		0.124997	4.98292e-05
53239	879	29161	Missouri	Phelps County	-450.585	-1030.44	-402.088	-919.498	123.181	281.702	109.923	251.373		0.000124244	0.000125539	0.000124234	0.000125596	0.000124311	0.000125606	0.000124301	0.000125663		0.124937	0.000711254
54480	2120	30065	Montana	Musselshell County	-453.164	-1023.57	-404.078	-912.609	123.884	279.821	110.465	249.486		0.000124955	0.000124702	0.000124849	0.000124655	0.000125021	0.000124768	0.000124915	0.00012472		0.124823	0.000132107
54919	2559	38055	North Dakota	McLean County	-453.026	-1022.57	-403.991	-911.871	123.847	279.549	110.442	249.286		0.000124917	0.000124581	0.000124823	0.000124554	0.000124983	0.000124647	0.000124888	0.00012462		0.124752	0.000169694
53240	880	39013	Ohio	Belmont County	-453.165	-1021.2	-404.121	-910.378	123.887	279.176	110.479	248.88		0.000124956	0.000124413	0.000124862	0.00012435	0.000125023	0.00012448	0.00012493	0.000124417		0.124679	0.000287554
52386	26	37147	North Carolina	Pitt County	-451.031	-1025.26	-402.569	-914.441	123.304	280.287	110.055	249.992		0.000124367	0.000124908	0.000124383	0.000124905	0.000124435	0.000124976	0.000124451	0.000124973		0.124675	0.000286419
52896	536	19015	Iowa	Boone County	-452.365	-1021.05	-403.569	-910.605	123.667	279.133	110.327	248.941		0.000124735	0.000124395	0.000124692	0.000124381	0.000124801	0.000124461	0.000124758	0.000124448		0.124584	0.000178472
52770	410	18005	Indiana	Bartholomew County	-451.318	-1019.35	-402.676	-909.182	123.382	278.672	110.084	248.553		0.000124446	0.000124188	0.000124416	0.000124187	0.000124514	0.000124255	0.000124483	0.000124254		0.124343	0.000135689
55111	2751	47001	Tennessee	Anderson County	-450.401	-1021.16	-401.749	-910.702	123.131	279.166	109.831	248.969		0.000124194	0.000124408	0.00012413	0.000124394	0.000124261	0.000124476	0.000124197	0.000124462		0.124315	0.000135424
53146	786	48467	Texas	Van Zandt County	-449.794	-1021.69	-401.202	-911.229	122.965	279.311	109.681	249.113		0.000124026	0.000124473	0.000123961	0.000124466	0.000124093	0.00012454	0.000124027	0.000124534		0.124265	0.000258455
53580	1220	16029	Idaho	Caribou County	-451.118	-1017.25	-402.554	-907.365	123.323	278.088	110.047	248.049		0.000124391	0.000123932	0.000124379	0.000123938	0.000124455	0.000123995	0.000124442	0.000124002		0.124192	0.000242774
54331	1971	42111	Pennsylvania	Somerset County	-449.96	-1019.16	-401.291	-908.988	123.011	278.62	109.706	248.501		0.000124072	0.000124165	0.000123988	0.00012416	0.000124139	0.000124233	0.000124055	0.000124228		0.12413	8.55737e-05
54921	2561	42033	Pennsylvania	Clearfield County	-450.048	-1018.44	-401.413	-908.201	123.035	278.423	109.739	248.285		0.000124096	0.000124077	0.000124026	0.000124053	0.000124163	0.000124144	0.000124093	0.00012412		0.124097	4.57206e-05
54169	1809	30047	Montana	Lake County	-449.384	-1017.57	-400.927	-907.552	122.852	278.183	109.605	248.106		0.000123913	0.000123971	0.000123876	0.000123964	0.000123979	0.000124037	0.000123942	0.00012403		0.123964	5.46956e-05
54391	2031	27085	Minnesota	McLeod County	-450.02	-1014.83	-401.487	-904.998	123.026	277.432	109.758	247.408		0.000124089	0.000123637	0.000124049	0.000123615	0.000124155	0.000123703	0.000124115	0.000123681		0.12388	0.000239898
54595	2235	17121	Illinois	Marion County	-447.634	-1014.19	-399.278	-904.447	122.375	277.259	109.155	247.259		0.000123431	0.000123559	0.000123366	0.00012354	0.000123497	0.000123626	0.000123433	0.000123607		0.123507	9.1823e-05
52387	27	29159	Missouri	Pettis County	-445.838	-1014.53	-397.863	-905.309	121.883	277.351	108.768	247.493		0.000122935	0.0001236	0.000122929	0.000123658	0.000123001	0.000123667	0.000122995	0.000123724		0.123314	0.000374895
52667	307	45041	South Carolina	Florence County	-446.229	-1011.04	-398.099	-901.598	121.991	276.401	108.833	246.481		0.000123043	0.000123176	0.000123002	0.000123151	0.00012311	0.000123243	0.000123069	0.000123218		0.123126	8.53762e-05
54078	1718	17011	Illinois	Bureau County	-445.818	-1006.75	-397.702	-897.938	121.878	275.226	108.724	245.479		0.00012293	0.000122653	0.000122879	0.000122651	0.000122996	0.000122719	0.000122945	0.000122717		0.122811	0.000140943
53547	1187	29109	Missouri	Lawrence County	-445.644	-1006.69	-397.506	-897.61	121.83	275.21	108.67	245.389		0.000122882	0.000122646	0.000122819	0.000122606	0.000122948	0.000122712	0.000122885	0.000122672		0.122771	0.000128179
54107	1747	13215	Georgia	Muscogee County	-444.799	-1007.92	-396.92	-898.906	121.6	275.547	108.511	245.744		0.000122649	0.000122796	0.000122638	0.000122783	0.000122715	0.000122862	0.000122704	0.00012285		0.12275	8.60497e-05
54170	1810	47155	Tennessee	Sevier County	-443.965	-1007.14	-396.186	-898.479	121.372	275.332	108.31	245.627		0.000122419	0.0001227	0.000122411	0.000122725	0.000122485	0.000122766	0.000122477	0.000122791		0.122597	0.000163264
55137	2777	27097	Minnesota	Morrison County	-445.077	-1003.63	-397.062	-894.998	121.675	274.372	108.549	244.674		0.000122725	0.000122273	0.000122682	0.000122249	0.000122791	0.000122338	0.000122747	0.000122315		0.122515	0.00023987
55174	2814	51031	Virginia	Campbell County	-443.444	-1005.64	-395.64	-896.859	121.229	274.922	108.161	245.185		0.000122275	0.000122517	0.000122242	0.000122503	0.000122341	0.000122584	0.000122308	0.00012257		0.122418	0.000139792
53351	991	48409	Texas	San Patricio County	-443.558	-1002.76	-395.838	-894.611	121.26	274.134	108.215	244.57		0.000122307	0.000122166	0.000122303	0.000122196	0.000122373	0.000122232	0.000122369	0.000122262		0.122276	7.58184e-05
52388	28	55015	Wisconsin	Calumet County	-443.959	-1001.41	-396.243	-893.195	121.37	273.767	108.325	244.182		0.000122417	0.000122003	0.000122429	0.000122003	0.000122483	0.000122068	0.000122494	0.000122069		0.122246	0.000227297
54079	1719	26157	Michigan	Tuscola County	-441.164	-999.578	-393.594	-891.705	120.606	273.265	107.601	243.775		0.000121647	0.000121779	0.00012161	0.000121799	0.000121712	0.000121845	0.000121675	0.000121865		0.121742	9.42877e-05
53458	1098	17029	Illinois	Coles County	-440.978	-998.712	-393.524	-890.865	120.555	273.029	107.582	243.545		0.000121595	0.000121673	0.000121588	0.000121685	0.000121661	0.000121739	0.000121654	0.00012175		0.121668	5.86482e-05
52771	411	55057	Wisconsin	Juneau County	-442.222	-996.159	-394.428	-888.129	120.895	272.33	107.829	242.797		0.000121938	0.000121362	0.000121868	0.000121311	0.000122003	0.000121428	0.000121933	0.000121376		0.121653	0.000306482
55244	2884	21199	Kentucky	Pulaski County	-439.459	-999.201	-392.08	-891.28	120.14	273.163	107.188	243.66		0.000121176	0.000121733	0.000121142	0.000121741	0.000121242	0.000121799	0.000121208	0.000121807		0.121481	0.000311285
55175	2815	23011	Maine	Kennebec County	-440.222	-997.166	-392.7	-889.512	120.349	272.607	107.357	243.176		0.000121387	0.000121485	0.000121334	0.0001215	0.000121453	0.000121551	0.000121399	0.000121566		0.121459	8.17308e-05
52639	279	37179	North Carolina	Union County	-440.268	-994.868	-393.034	-887.571	120.361	271.979	107.448	242.646		0.000121399	0.000121205	0.000121437	0.000121235	0.000121465	0.000121271	0.000121503	0.000121301		0.121352	0.000113067
54392	2032	33013	New Hampshire	Merrimack County	-439.444	-993.621	-392.021	-886.22	120.136	271.638	107.171	242.276		0.000121172	0.000121053	0.000121124	0.00012105	0.000121238	0.000121119	0.00012119	0.000121116		0.121133	6.49647e-05
54662	2302	54107	West Virginia	Wood County	-438.976	-992.437	-391.635	-885.247	120.008	271.314	107.066	242.01		0.000121043	0.000120909	0.000121005	0.000120917	0.000121108	0.000120975	0.00012107	0.000120983		0.121001	7.03219e-05
54711	2351	39063	Ohio	Hancock County	-438.72	-991.536	-391.392	-884.248	119.938	271.067	106.999	241.737		0.000120973	0.000120799	0.00012093	0.000120781	0.000121038	0.000120865	0.000120995	0.000120846		0.120903	9.45955e-05
53936	1576	55045	Wisconsin	Green County	-438.957	-990.108	-391.605	-882.981	120.002	270.676	107.057	241.39		0.000121038	0.000120625	0.000120996	0.000120608	0.000121103	0.00012069	0.00012106	0.000120673		0.120849	0.00021744
54922	2562	20055	Kansas	Finney County	-437.624	-991.763	-390.92	-884.973	119.637	271.127	106.869	241.933		0.00012067	0.000120827	0.000120784	0.00012088	0.000120734	0.000120891	0.000120848	0.000120944		0.120822	8.93921e-05
52772	412	13245	Georgia	Richmond County	-437.601	-991.39	-390.561	-884.214	119.632	271.028	106.772	241.728		0.000120664	0.000120781	0.000120673	0.000120776	0.00012073	0.000120847	0.000120738	0.000120842		0.120757	6.87437e-05
54923	2563	51143	Virginia	Pittsylvania County	-437.805	-990.532	-390.457	-883.202	119.688	270.793	106.744	241.451		0.00012072	0.000120677	0.000120641	0.000120638	0.000120786	0.000120743	0.000120706	0.000120704		0.120702	4.99698e-05
53661	1301	48499	Texas	Wood County	-437.044	-990.827	-389.739	-883.532	119.48	270.873	106.547	241.541		0.000120511	0.000120713	0.000120419	0.000120683	0.000120576	0.000120778	0.000120484	0.000120748		0.120614	0.000134516
54712	2352	40083	Oklahoma	Logan County	-435.587	-989.931	-388.808	-883.135	119.081	270.628	106.293	241.432		0.000120109	0.000120604	0.000120131	0.000120629	0.000120173	0.000120669	0.000120196	0.000120694		0.1204	0.000267935
52465	105	18177	Indiana	Wayne County	-436.808	-987.393	-389.667	-880.598	119.415	269.935	106.528	240.739		0.000120445	0.000120294	0.000120397	0.000120282	0.00012051	0.00012036	0.000120462	0.000120347		0.120387	8.11782e-05
55176	2816	54081	West Virginia	Raleigh County	-436.057	-988.198	-389.022	-881.422	119.21	270.155	106.351	240.964		0.000120238	0.000120393	0.000120197	0.000120395	0.000120303	0.000120458	0.000120262	0.00012046		0.120338	0.000101549
52389	29	37025	North Carolina	Cabarrus County	-436.713	-985.521	-389.766	-879.127	119.389	269.423	106.555	240.337		0.000120419	0.000120066	0.000120427	0.000120081	0.000120484	0.000120132	0.000120492	0.000120147		0.120281	0.000190058
52773	413	42063	Pennsylvania	Indiana County	-433.685	-986.981	-386.903	-880.527	118.561	269.822	105.772	240.72		0.000119584	0.000120244	0.000119543	0.000120273	0.000119649	0.00012031	0.000119607	0.000120338		0.119943	0.000373697
52946	586	55123	Wisconsin	Vernon County	-435.749	-982.562	-388.677	-876.12	119.125	268.613	106.257	239.514		0.000120154	0.000119706	0.000120091	0.000119671	0.000120218	0.00011977	0.000120155	0.000119735		0.119937	0.00023603
53043	683	51165	Virginia	Rockingham County	-433.643	-983.744	-387.04	-877.548	118.55	268.938	105.81	239.906		0.000119573	0.00011985	0.000119585	0.000119866	0.000119637	0.000119915	0.00011965	0.000119931		0.119751	0.000153373
53147	787	47147	Tennessee	Robertson County	-433.053	-983.009	-386.48	-876.906	118.389	268.736	105.656	239.73		0.00011941	0.00011976	0.000119412	0.000119778	0.000119475	0.000119825	0.000119476	0.000119843		0.119622	0.000194786
53352	992	20079	Kansas	Harvey County	-433.92	-978.938	-387.095	-872.928	118.625	267.622	105.824	238.641		0.000119649	0.000119264	0.000119602	0.000119235	0.000119713	0.000119328	0.000119666	0.000119299		0.11947	0.000205016
54393	2033	13057	Georgia	Cherokee County	-432.358	-976.825	-386.075	-871.62	118.199	267.046	105.546	238.285		0.000119218	0.000119007	0.000119287	0.000119056	0.000119283	0.000119072	0.000119351	0.000119121		0.119174	0.000127124
54596	2236	34009	New Jersey	Cape May County	-432.111	-977.386	-385.302	-871.291	118.131	267.2	105.335	238.195		0.00011915	0.000119075	0.000119048	0.000119011	0.000119215	0.00011914	0.000119113	0.000119076		0.119104	6.45844e-05
54778	2418	6105	California	Trinity County	-433.097	-975.202	-386.154	-869.268	118.4	266.6	105.567	237.64		0.000119422	0.000118809	0.000119311	0.000118735	0.000119486	0.000118873	0.000119375	0.000118798		0.119101	0.000323749
54924	2564	56013	Wyoming	Fremont County	-429.547	-982.73	-383.227	-876.246	117.324	268.417	104.672	239.333		0.000118443	0.000119726	0.000118407	0.000119688	0.0001184	0.000119683	0.000118364	0.000119645		0.119044	0.000685937
55300	2940	21037	Kentucky	Campbell County	-428.706	-973.347	-382.603	-868.343	117.2	266.095	104.596	237.389		0.000118211	0.000118583	0.000118214	0.000118608	0.000118275	0.000118648	0.000118278	0.000118673		0.118436	0.000208004
54779	2419	55033	Wisconsin	Dunn County	-429.517	-970.407	-383.332	-865.473	117.421	265.29	104.795	236.603		0.000118435	0.000118225	0.000118439	0.000118216	0.000118498	0.000118288	0.000118503	0.00011828		0.118361	0.000120618
53937	1577	44009	Rhode Island	Washington County	-429.233	-969.421	-382.895	-864.578	117.345	265.022	104.677	236.36		0.000118357	0.000118105	0.000118304	0.000118094	0.000118421	0.000118169	0.000118369	0.000118158		0.118247	0.000129696
55261	2901	12053	Florida	Hernando County	-428.12	-968.164	-381.766	-863.274	117.04	264.679	104.368	236.004		0.00011805	0.000117952	0.000117955	0.000117916	0.000118114	0.000118016	0.000118019	0.00011798		0.118	6.30534e-05
53662	1302	19027	Iowa	Carroll County	-428.405	-965.96	-382.146	-861.438	117.117	264.073	104.471	235.499		0.000118128	0.000117683	0.000118073	0.000117665	0.000118191	0.000117746	0.000118136	0.000117728		0.117919	0.000231445
54010	1650	29113	Missouri	Lincoln County	-426.497	-967.821	-380.712	-863.445	116.596	264.583	104.079	236.049		0.000117602	0.00011791	0.00011763	0.000117939	0.000117665	0.000117974	0.000117693	0.000118003		0.117802	0.000169209
53241	881	20037	Kansas	Crawford County	-425.401	-962.761	-379.514	-858.46	116.296	263.2	103.752	234.686		0.0001173	0.000117294	0.00011726	0.000117258	0.000117363	0.000117357	0.000117323	0.000117322		0.117309	3.92797e-05
54925	2565	30007	Montana	Broadwater County	-425.41	-961.902	-379.476	-857.84	116.297	262.961	103.74	234.513		0.000117302	0.000117189	0.000117248	0.000117174	0.000117364	0.00011725	0.000117309	0.000117235		0.117259	6.35513e-05
52668	308	39145	Ohio	Scioto County	-423.965	-962.546	-378.239	-858.482	115.904	263.142	103.404	234.693		0.000116904	0.000117267	0.000116866	0.000117261	0.000116967	0.000117331	0.000116929	0.000117325		0.117106	0.00020628
53938	1578	41057	Oregon	Tillamook County	-423.528	-956.862	-377.711	-853.317	115.784	261.587	103.259	233.28		0.000116784	0.000116575	0.000116703	0.000116556	0.000116846	0.000116638	0.000116765	0.000116619		0.116686	0.000105526
53353	993	29101	Missouri	Johnson County	-421.951	-959.787	-376.611	-856.16	115.353	262.387	102.958	234.057		0.000116349	0.000116931	0.000116363	0.000116944	0.000116411	0.000116994	0.000116425	0.000117007		0.116678	0.000313117
54663	2303	20125	Kansas	Montgomery County	-422.552	-957.489	-376.847	-853.624	115.517	261.758	103.022	233.364		0.000116514	0.000116651	0.000116436	0.000116598	0.000116577	0.000116714	0.000116498	0.00011666		0.116581	9.3855e-05
55364	3004	47141	Tennessee	Putnam County	-421.654	-958.879	-376.244	-855.302	115.272	262.14	102.858	233.824		0.000116267	0.000116821	0.000116249	0.000116827	0.00011633	0.000116884	0.000116312	0.000116891		0.116573	0.000304487
52774	414	36103	New York	Suffolk County	-422.58	-955.382	-377.061	-852.196	115.469	261.057	103.031	232.861		0.000116522	0.000116395	0.000116502	0.000116403	0.000116528	0.000116401	0.000116508	0.000116409		0.116459	6.11902e-05
53044	684	29105	Missouri	Laclede County	-420.36	-950.906	-374.971	-847.962	114.918	259.959	102.51	231.816		0.00011591	0.000115849	0.000115856	0.000115825	0.000115972	0.000115912	0.000115918	0.000115887		0.115891	4.71266e-05
53148	788	28075	Mississippi	Lauderdale County	-419.926	-951.085	-374.632	-848.116	114.8	260.009	102.418	231.86		0.00011579	0.000115871	0.000115751	0.000115845	0.000115853	0.000115934	0.000115814	0.000115909		0.115846	6.0333e-05
53354	994	51710	Virginia	Norfolk city	-419.111	-949.701	-374.151	-847.148	114.577	259.631	102.286	231.595		0.000115566	0.000115702	0.000115603	0.000115713	0.000115628	0.000115765	0.000115665	0.000115776		0.115677	7.57035e-05
54926	2566	42097	Pennsylvania	Northumberland County	-419.1	-948.867	-373.778	-846.298	114.574	259.403	102.184	231.362		0.000115563	0.000115601	0.000115487	0.000115597	0.000115625	0.000115664	0.00011555	0.00011566		0.115593	5.92435e-05
55177	2817	40113	Oklahoma	Osage County	-418.746	-948.503	-373.712	-846.142	114.477	259.302	102.165	231.319		0.000115465	0.000115557	0.000115467	0.000115576	0.000115527	0.000115619	0.000115529	0.000115638		0.115547	6.35431e-05
55178	2818	17103	Illinois	Lee County	-419.052	-947.306	-373.9	-845.003	114.561	258.975	102.217	231.007		0.000115549	0.000115411	0.000115525	0.00011542	0.000115612	0.000115473	0.000115587	0.000115483		0.115507	7.36921e-05
54927	2567	41065	Oregon	Wasco County	-419.45	-946.188	-374.05	-843.558	114.669	258.669	102.258	230.612		0.000115659	0.000115274	0.000115571	0.000115223	0.000115721	0.000115336	0.000115633	0.000115285		0.115463	0.000202405
55365	3005	36011	New York	Cayuga County	-418.606	-946.244	-373.431	-844.045	114.439	258.686	102.089	230.746		0.000115426	0.000115281	0.00011538	0.000115289	0.000115489	0.000115344	0.000115443	0.000115352		0.115376	7.34305e-05
52947	587	40115	Oklahoma	Ottawa County	-418.281	-946.236	-373.096	-843.745	114.35	258.682	101.997	230.663		0.000115337	0.00011528	0.000115277	0.000115248	0.000115399	0.000115342	0.000115339	0.00011531		0.115317	4.76265e-05
53242	882	1083	Alabama	Limestone County	-417.088	-944.341	-372.242	-842.34	114.024	258.165	101.764	230.28		0.000115008	0.000115049	0.000115013	0.000115057	0.00011507	0.000115112	0.000115075	0.000115119		0.115063	4.06112e-05
54597	2237	17109	Illinois	McDonough County	-415.919	-943.525	-371.037	-841.519	113.704	257.941	101.434	230.055		0.000114685	0.00011495	0.00011464	0.000114944	0.000114747	0.000115012	0.000114702	0.000115006		0.114836	0.000156536
55366	3006	1081	Alabama	Lee County	-415.135	-940.709	-370.699	-839.294	113.491	257.173	101.343	229.448		0.000114469	0.000114607	0.000114536	0.00011464	0.000114532	0.00011467	0.000114598	0.000114703		0.114594	7.81167e-05
53744	1384	1043	Alabama	Cullman County	-414.595	-940.506	-369.835	-838.663	113.343	257.117	101.106	229.275		0.00011432	0.000114582	0.000114269	0.000114554	0.000114382	0.000114645	0.000114331	0.000114617		0.114463	0.000151644
52775	415	1127	Alabama	Walker County	-413.34	-941.169	-368.618	-839.092	113	257.299	100.773	229.393		0.000113974	0.000114663	0.000113893	0.000114613	0.000114036	0.000114725	0.000113955	0.000114675		0.114317	0.000379848
54250	1890	40097	Oklahoma	Mayes County	-414.57	-937.53	-369.888	-836.153	113.335	256.302	101.12	228.588		0.000114314	0.00011422	0.000114286	0.000114212	0.000114375	0.000114281	0.000114347	0.000114273		0.114288	5.66633e-05
54928	2568	18109	Indiana	Morgan County	-414.741	-936.512	-370.093	-835.386	113.382	256.025	101.177	228.379		0.000114361	0.000114096	0.000114349	0.000114107	0.000114422	0.000114157	0.000114411	0.000114168		0.114259	0.000139649
54332	1972	29009	Missouri	Barry County	-414.077	-936.696	-369.356	-835.307	113.2	256.074	100.975	228.356		0.000114177	0.000114118	0.000114121	0.000114096	0.000114239	0.00011418	0.000114182	0.000114157		0.114159	4.59346e-05
53045	685	1115	Alabama	St. Clair County	-413.608	-935.065	-369.022	-833.883	113.073	255.63	100.884	227.968		0.000114048	0.000113919	0.000114018	0.000113901	0.00011411	0.000113981	0.00011408	0.000113963		0.114003	7.46085e-05
52390	30	47167	Tennessee	Tipton County	-412.693	-935.885	-368.304	-834.858	112.822	255.853	100.687	228.234		0.000113796	0.000114019	0.000113796	0.000114035	0.000113857	0.000114081	0.000113858	0.000114096		0.113942	0.000127965
52466	106	26043	Michigan	Dickinson County	-413.406	-933.788	-368.665	-832.606	113.017	255.279	100.786	227.618		0.000113993	0.000113764	0.000113908	0.000113727	0.000114054	0.000113825	0.000113969	0.000113788		0.113878	0.000119441
52669	309	8119	Colorado	Teller County	-412.587	-931.244	-368.149	-830.593	112.792	254.58	100.643	227.065		0.000113767	0.000113454	0.000113748	0.000113452	0.000113826	0.000113513	0.000113808	0.000113511		0.113635	0.000166031
52776	416	51003	Virginia	Albemarle County	-412.222	-931.6	-367.977	-831.117	112.694	254.682	100.598	227.212		0.000113666	0.000113497	0.000113695	0.000113524	0.000113728	0.000113559	0.000113757	0.000113585		0.113626	9.78526e-05
52897	537	26105	Michigan	Mason County	-411.071	-928.886	-366.619	-828.308	112.379	253.939	100.227	226.443		0.000113349	0.000113167	0.000113276	0.00011314	0.00011341	0.000113228	0.000113337	0.000113201		0.113263	9.55676e-05
52948	588	17105	Illinois	Livingston County	-410.254	-930.013	-366.005	-829.478	112.156	254.248	100.059	226.763		0.000113123	0.000113304	0.000113086	0.0001133	0.000113184	0.000113365	0.000113146	0.000113361		0.113234	0.000111388
53046	686	48363	Texas	Palo Pinto County	-410.536	-929.323	-366.232	-828.848	112.233	254.059	100.121	226.591		0.000113201	0.00011322	0.000113156	0.000113214	0.000113262	0.000113281	0.000113217	0.000113275		0.113228	4.21958e-05
53149	789	46047	South Dakota	Fall River County	-410.791	-926.94	-366.311	-826.539	112.301	253.405	100.141	225.957		0.000113271	0.00011293	0.00011318	0.000112898	0.000113331	0.000112989	0.00011324	0.000112958		0.1131	0.000173584
53243	883	21107	Kentucky	Hopkins County	-409.743	-928.804	-365.51	-828.363	112.016	253.918	99.9237	226.459		0.000112982	0.000113157	0.000112933	0.000113147	0.000113043	0.000113218	0.000112994	0.000113209		0.113085	0.000110632
53355	995	40013	Oklahoma	Bryan County	-409.667	-927.775	-365.462	-827.351	111.995	253.636	99.9102	226.182		0.000112962	0.000113031	0.000112918	0.000113009	0.000113022	0.000113092	0.000112979	0.00011307		0.11301	5.70908e-05
53506	1146	19083	Iowa	Hardin County	-410.45	-925.843	-365.998	-825.442	112.209	253.106	100.057	225.659		0.000113177	0.000112796	0.000113084	0.000112748	0.000113238	0.000112856	0.000113144	0.000112809		0.112982	0.00019834
53548	1188	47145	Tennessee	Roane County	-408.939	-925.945	-364.729	-825.743	111.796	253.136	99.7103	225.743		0.000112761	0.000112808	0.000112692	0.00011279	0.000112822	0.00011287	0.000112753	0.000112851		0.112793	5.76329e-05
53745	1385	12017	Florida	Citrus County	-408.345	-924.139	-364.067	-823.951	111.634	252.643	99.5293	225.254		0.000112597	0.000112588	0.000112487	0.000112545	0.000112658	0.00011265	0.000112548	0.000112606		0.112585	5.6997e-05
53844	1484	39141	Ohio	Ross County	-407.919	-923.405	-363.997	-823.83	111.518	252.442	99.5101	225.22		0.00011248	0.000112499	0.000112465	0.000112528	0.00011254	0.00011256	0.000112526	0.000112589		0.112523	4.11371e-05
54011	1651	51760	Virginia	Richmond city	-404.373	-926.614	-360.922	-826.442	110.548	253.319	98.6695	225.934		0.000111502	0.00011289	0.000111515	0.000112885	0.000111562	0.000112951	0.000111576	0.000112947		0.112228	0.00073802
54171	1811	56017	Wyoming	Hot Springs County	-407.776	-919.144	-363.638	-819.42	111.476	251.271	99.4097	224.009		0.00011244	0.00011198	0.000112355	0.000111926	0.000112498	0.000112038	0.000112413	0.000111984		0.112204	0.00024267
54251	1891	21151	Kentucky	Madison County	-404.37	-921.24	-361.032	-822.063	110.547	251.85	98.6994	224.737		0.000111501	0.000112235	0.000111549	0.000112287	0.000111561	0.000112296	0.00011161	0.000112348		0.111923	0.000395772
54394	2034	32021	Nevada	Mineral County	-406.509	-917.458	-362.425	-817.858	111.13	250.811	99.0783	223.582		0.000112091	0.000111774	0.00011198	0.000111712	0.000112149	0.000111833	0.000112038	0.000111771		0.111918	0.000166175
54598	2238	31067	Nebraska	Gage County	-406.439	-916.565	-362.479	-817.212	111.112	250.57	99.0942	223.409		0.000112071	0.000111665	0.000111996	0.000111624	0.000112131	0.000111725	0.000112056	0.000111684		0.111869	0.000212801
54780	2420	25015	Massachusetts	Hampshire County	-405.201	-917.863	-361.546	-818.845	110.775	250.927	98.8401	223.857		0.00011173	0.000111824	0.000111708	0.000111847	0.000111791	0.000111885	0.000111769	0.000111908		0.111808	7.12807e-05
54929	2569	8089	Colorado	Otero County	-406.066	-916.057	-362.105	-816.604	111.009	250.429	98.9913	223.241		0.000111969	0.000111604	0.000111881	0.000111541	0.000112028	0.000111663	0.00011194	0.0001116		0.111778	0.000195189
55138	2778	51177	Virginia	Spotsylvania County	-405.084	-915.134	-361.665	-816.488	110.743	250.181	98.8725	223.213		0.000111698	0.000111491	0.000111745	0.000111525	0.000111758	0.000111552	0.000111805	0.000111586		0.111645	0.000120393
55179	2819	51069	Virginia	Frederick County	-404.765	-916.038	-361.206	-817.071	110.655	250.428	98.7472	223.372		0.00011161	0.000111601	0.000111603	0.000111605	0.00011167	0.000111662	0.000111664	0.000111666		0.111635	3.2534e-05
55262	2902	26143	Michigan	Roscommon County	-403.897	-916.358	-360.2	-817.558	110.418	250.515	98.4719	223.505		0.00011137	0.00011164	0.000111292	0.000111672	0.00011143	0.000111701	0.000111352	0.000111732		0.111524	0.000179397
53459	1099	39143	Ohio	Sandusky County	-404.541	-913.976	-360.857	-815.096	110.594	249.864	98.6515	222.832		0.000111548	0.00011135	0.000111495	0.000111335	0.000111608	0.00011141	0.000111555	0.000111396		0.111462	0.000103002
53528	1168	48097	Texas	Cooke County	-403.958	-914.16	-360.422	-815.351	110.434	249.914	98.5324	222.901		0.000111387	0.000111372	0.000111361	0.00011137	0.000111447	0.000111433	0.000111421	0.00011143		0.111403	3.3721e-05
55180	2820	26057	Michigan	Gratiot County	-402.96	-913.701	-359.507	-815.093	110.162	249.788	98.2825	222.831		0.000111112	0.000111317	0.000111078	0.000111335	0.000111172	0.000111377	0.000111138	0.000111395		0.11124	0.000128232
53663	1303	21047	Kentucky	Christian County	-401.97	-912.881	-358.943	-814.563	109.891	249.564	98.1284	222.686		0.000110839	0.000111217	0.000110904	0.000111262	0.000110899	0.000111277	0.000110964	0.000111323		0.111086	0.000201662
54930	2570	48349	Texas	Navarro County	-401.819	-911.194	-358.468	-812.626	109.85	249.103	97.9983	222.156		0.000110798	0.000111011	0.000110757	0.000110998	0.000110857	0.000111071	0.000110817	0.000111058		0.110921	0.000126698
52597	237	35051	New Mexico	Sierra County	-402.56	-909.852	-358.878	-811.114	110.051	248.734	98.1092	221.741		0.000111002	0.000110848	0.000110884	0.000110791	0.00011106	0.000110906	0.000110942	0.00011085		0.11091	8.81247e-05
52898	538	17203	Illinois	Woodford County	-402.249	-908.747	-358.931	-810.641	109.967	248.434	98.1247	221.614		0.000110916	0.000110713	0.0001109	0.000110727	0.000110976	0.000110773	0.00011096	0.000110787		0.110844	0.000105798
53150	790	26047	Michigan	Emmet County	-402.171	-908.709	-358.777	-810.435	109.946	248.424	98.0827	221.557		0.000110895	0.000110708	0.000110853	0.000110699	0.000110954	0.000110768	0.000110912	0.000110758		0.110818	9.77154e-05
55424	3064	48199	Texas	Hardin County	-401.035	-910.557	-357.77	-811.97	109.636	248.929	97.8077	221.977		0.000110581	0.000110934	0.000110541	0.000110908	0.000110641	0.000110994	0.000110601	0.000110968		0.110771	0.000195745
52527	167	48397	Texas	Rockwall County	-401.915	-907.58	-358.808	-809.729	109.876	248.115	98.0913	221.365		0.000110824	0.000110571	0.000110862	0.000110602	0.000110884	0.000110631	0.000110922	0.000110662		0.110745	0.00014202
54931	2571	21195	Kentucky	Pike County	-399.991	-911.259	-356.789	-812.655	109.35	249.121	97.5394	222.165		0.000110293	0.000111019	0.000110238	0.000111002	0.000110353	0.000111079	0.000110298	0.000111062		0.110668	0.000400092
54012	1652	48203	Texas	Harrison County	-399.559	-906.338	-356.473	-808.218	109.232	247.776	97.4532	220.952		0.000110174	0.00011042	0.000110141	0.000110396	0.000110234	0.000110479	0.0001102	0.000110456		0.110312	0.0001384
52467	107	18059	Indiana	Hancock County	-400.102	-904.803	-357.049	-807.136	109.38	247.356	97.6105	220.656		0.000110324	0.000110232	0.000110319	0.000110248	0.000110384	0.000110292	0.000110378	0.000110308		0.110311	5.41209e-05
52777	417	55001	Wisconsin	Adams County	-400.578	-902.606	-357.18	-804.642	109.51	246.755	97.6459	219.973		0.000110455	0.000109965	0.000110359	0.000109907	0.000110514	0.000110024	0.000110418	0.000109967		0.110201	0.000257263
52949	589	33009	New Hampshire	Grafton County	-399.167	-902.816	-356.092	-805.264	109.125	246.813	97.349	220.144		0.000110066	0.00010999	0.000110023	0.000109992	0.000110126	0.00011005	0.000110082	0.000110052		0.110048	4.5769e-05
53047	687	27091	Minnesota	Martin County	-399.882	-901.452	-356.617	-803.748	109.319	246.438	97.4918	219.728		0.000110263	0.000109824	0.000110185	0.000109785	0.000110322	0.000109883	0.000110244	0.000109844		0.110044	0.000228859
53356	996	12085	Florida	Martin County	-398.135	-900.175	-355.022	-802.572	108.843	246.092	97.0568	219.409		0.000109782	0.000109669	0.000109692	0.000109625	0.000109841	0.000109729	0.000109752	0.000109684		0.109722	6.9027e-05
54172	1812	39081	Ohio	Jefferson County	-397.151	-899.201	-354.082	-801.544	108.574	245.825	96.7995	219.127		0.00010951	0.00010955	0.000109402	0.000109484	0.00010957	0.00010961	0.000109461	0.000109544		0.109516	6.61042e-05
54395	2035	37101	North Carolina	Johnston County	-395.863	-895.835	-353.397	-799.358	108.222	244.905	96.6124	218.53		0.000109155	0.00010914	0.00010919	0.000109186	0.000109214	0.000109199	0.00010925	0.000109245		0.109197	3.8814e-05
54599	2239	54033	West Virginia	Harrison County	-396.172	-895.683	-353.4	-798.837	108.306	244.863	96.6132	218.387		0.00010924	0.000109121	0.000109191	0.000109114	0.000109299	0.000109181	0.00010925	0.000109174		0.109196	6.39011e-05
54013	1653	48347	Texas	Nacogdoches County	-394.236	-895.174	-351.828	-798.396	107.777	244.724	96.1831	218.266		0.000108707	0.000109059	0.000108705	0.000109054	0.000108765	0.000109119	0.000108764	0.000109113		0.108911	0.000190229
52670	310	37151	North Carolina	Randolph County	-395.149	-892.849	-352.55	-796.338	108.027	244.089	96.3806	217.704		0.000108958	0.000108776	0.000108928	0.000108773	0.000109017	0.000108835	0.000108987	0.000108832		0.108889	9.623e-05
54014	1654	30015	Montana	Chouteau County	-393.22	-890.056	-350.793	-793.786	107.497	243.321	95.8988	217.003		0.000108426	0.000108436	0.000108386	0.000108425	0.000108483	0.000108493	0.000108443	0.000108482		0.108447	3.67628e-05
54932	2572	48007	Texas	Aransas County	-393.252	-888.363	-350.65	-792.04	107.508	242.862	95.861	216.529		0.000108435	0.00010823	0.000108341	0.000108186	0.000108494	0.000108288	0.0001084	0.000108245		0.108327	0.000108701
52950	590	31159	Nebraska	Seward County	-393.358	-886.919	-350.864	-790.814	107.536	242.466	95.9191	216.192		0.000108465	0.000108054	0.000108408	0.000108018	0.000108522	0.000108112	0.000108465	0.000108076		0.108265	0.000217492
53357	997	42005	Pennsylvania	Armstrong County	-392.216	-888.307	-349.804	-792.245	107.225	242.847	95.63	216.585		0.00010815	0.000108223	0.00010808	0.000108214	0.000108208	0.000108282	0.000108139	0.000108273		0.108196	6.8901e-05
53939	1579	29209	Missouri	Stone County	-392.612	-887.474	-350.154	-791.355	107.333	242.618	95.7254	216.341		0.000108259	0.000108121	0.000108188	0.000108092	0.000108317	0.00010818	0.000108246	0.000108151		0.108194	7.54008e-05
54396	2036	18173	Indiana	Warrick County	-392.35	-886.525	-350.087	-790.774	107.261	242.359	95.7071	216.183		0.000108187	0.000108006	0.000108168	0.000108013	0.000108245	0.000108064	0.000108226	0.000108072		0.108122	9.51778e-05
54933	2573	22101	Louisiana	St. Mary Parish	-392.038	-886.008	-349.767	-790.099	107.176	242.219	95.6199	215.999		0.0001081	0.000107943	0.000108069	0.000107921	0.000108159	0.000108001	0.000108127	0.00010798		0.108037	8.85765e-05
54015	1655	9013	Connecticut	Tolland County	-391.88	-885.548	-349.792	-790.145	107.133	242.093	95.6268	216.011		0.000108057	0.000107887	0.000108076	0.000107927	0.000108116	0.000107945	0.000108135	0.000107986		0.108016	9.24936e-05
52598	238	40015	Oklahoma	Caddo County	-391.772	-885.652	-349.491	-789.775	107.103	242.12	95.5441	215.909		0.000108027	0.000107899	0.000107984	0.000107877	0.000108085	0.000107957	0.000108041	0.000107935		0.107976	7.23534e-05
53940	1580	55137	Wisconsin	Waushara County	-391.689	-882.442	-349.317	-786.726	107.08	241.242	95.4964	215.075		0.000108004	0.000107508	0.00010793	0.00010746	0.000108062	0.000107566	0.000107988	0.000107518		0.107755	0.000262067
54016	1656	26035	Michigan	Clare County	-390.386	-883.195	-348.224	-787.746	106.724	241.449	95.1978	215.355		0.000107645	0.0001076	0.000107592	0.0001076	0.000107703	0.000107658	0.00010765	0.000107658		0.107638	3.82497e-05
54481	2121	54055	West Virginia	Mercer County	-389.559	-884.456	-347.462	-788.764	106.498	241.794	94.9896	215.633		0.000107417	0.000107754	0.000107356	0.000107739	0.000107475	0.000107812	0.000107414	0.000107797		0.107596	0.000196143
55112	2752	48179	Texas	Gray County	-390.028	-880.264	-347.985	-784.988	106.626	240.646	95.132	214.6		0.000107546	0.000107243	0.000107518	0.000107223	0.000107604	0.0001073	0.000107575	0.00010728		0.107411	0.000163434
55263	2903	53003	Washington	Asotin County	-389.376	-879.268	-347.28	-783.969	106.448	240.374	94.9394	214.322		0.000107367	0.000107122	0.0001073	0.000107084	0.000107424	0.000107179	0.000107358	0.000107141		0.107247	0.00013036
52468	108	37159	North Carolina	Rowan County	-387.811	-879.529	-345.991	-784.438	106.021	240.447	94.5875	214.451		0.000106935	0.000107153	0.000106902	0.000107148	0.000106993	0.000107212	0.00010696	0.000107206		0.107064	0.000128554
53358	998	27083	Minnesota	Lyon County	-388.406	-877.38	-346.592	-782.496	106.182	239.857	94.751	213.918		0.000107099	0.000106892	0.000107088	0.000106882	0.000107156	0.000106949	0.000107145	0.000106939		0.107019	0.000114585
53529	1169	31025	Nebraska	Cass County	-388.709	-876.689	-346.784	-781.814	106.265	239.668	94.8035	213.732		0.000107183	0.000106807	0.000107147	0.000106789	0.00010724	0.000106864	0.000107204	0.000106846		0.10701	0.000198796
54482	2122	27105	Minnesota	Nobles County	-388.335	-875.592	-346.515	-780.911	106.163	239.368	94.73	213.485		0.00010708	0.000106674	0.000107064	0.000106666	0.000107136	0.000106731	0.000107121	0.000106723		0.106899	0.00021709
54934	2574	12109	Florida	St. Johns County	-387.858	-876.01	-346.054	-781.267	106.034	239.486	94.605	213.585		0.000106948	0.000106725	0.000106921	0.000106714	0.000107006	0.000106783	0.00010698	0.000106773		0.106856	0.000119593
53845	1485	12097	Florida	Osceola County	-386.719	-876.402	-345.297	-781.918	105.722	239.593	94.3982	213.763		0.000106634	0.000106772	0.000106688	0.000106803	0.000106692	0.000106831	0.000106746	0.000106862		0.106753	7.84578e-05
54252	1892	39101	Ohio	Marion County	-385.939	-873.821	-344.387	-779.546	105.508	238.886	94.1488	213.113		0.000106419	0.000106458	0.000106406	0.000106479	0.000106476	0.000106516	0.000106464	0.000106537		0.106469	4.40393e-05
54253	1893	55121	Wisconsin	Trempealeau County	-386.795	-871.351	-345.03	-776.923	105.742	238.21	94.3243	212.395		0.000106655	0.000106157	0.000106605	0.000106121	0.000106712	0.000106214	0.000106662	0.000106178		0.106413	0.000265194
53244	884	26069	Michigan	Iosco County	-386.091	-871.38	-344.223	-776.903	105.55	238.218	94.104	212.39		0.000106461	0.000106161	0.000106356	0.000106118	0.000106518	0.000106218	0.000106413	0.000106176		0.106302	0.000152975
54397	2037	35027	New Mexico	Lincoln County	-384.813	-873.488	-343.348	-779.251	105.2	238.793	93.8638	213.03		0.000106108	0.000106417	0.000106085	0.000106439	0.000106165	0.000106474	0.000106141	0.000106496		0.106291	0.000180235
52899	539	49029	Utah	Morgan County	-384.952	-871.641	-343.853	-777.745	105.234	238.281	93.9992	212.612		0.000106147	0.000106192	0.000106241	0.000106233	0.0001062	0.000106246	0.000106294	0.000106287		0.10623	4.93557e-05
53581	1221	17081	Illinois	Jefferson County	-385.146	-869.995	-343.59	-775.925	105.292	237.84	93.9308	212.123		0.0001062	0.000105992	0.00010616	0.000105985	0.000106257	0.000106049	0.000106217	0.000106042		0.106113	0.000108014
54173	1813	26059	Michigan	Hillsdale County	-384.246	-870.843	-342.811	-776.891	105.045	238.072	93.7182	212.387		0.000105952	0.000106095	0.00010592	0.000106117	0.000106009	0.000106153	0.000105977	0.000106174		0.106049	9.72088e-05
52391	31	29127	Missouri	Marion County	-383.852	-871.864	-342.377	-777.396	104.938	238.35	93.5991	212.525		0.000105843	0.00010622	0.000105785	0.000106186	0.0001059	0.000106277	0.000105842	0.000106243		0.106037	0.000211421
53846	1486	37125	North Carolina	Moore County	-384.847	-869.172	-343.183	-774.908	105.21	237.616	93.8199	211.846		0.000106118	0.000105892	0.000106034	0.000105846	0.000106175	0.000105949	0.000106092	0.000105904		0.106001	0.000120452
53746	1386	17021	Illinois	Christian County	-383.964	-867.49	-342.509	-773.669	104.968	237.155	93.6355	211.506		0.000105874	0.000105687	0.000105826	0.000105677	0.000105931	0.000105744	0.000105883	0.000105734		0.105794	9.6873e-05
54664	2304	29107	Missouri	Lafayette County	-383.105	-866.614	-341.757	-772.873	104.733	236.915	93.4295	211.288		0.000105637	0.00010558	0.000105594	0.000105568	0.000105694	0.000105637	0.00010565	0.000105625		0.105623	4.12508e-05
53048	688	19041	Iowa	Clay County	-383.071	-864.322	-341.693	-770.777	104.724	236.287	93.4117	210.714		0.000105628	0.000105301	0.000105574	0.000105282	0.000105684	0.000105357	0.00010563	0.000105338		0.105474	0.000169708
54781	2421	48401	Texas	Rusk County	-381.382	-867.099	-340.285	-773.378	104.263	237.049	93.0275	211.427		0.000105162	0.000105639	0.000105139	0.000105637	0.000105219	0.000105696	0.000105196	0.000105694		0.105423	0.000262604
52431	71	40081	Oklahoma	Lincoln County	-381.603	-863.415	-340.451	-770.023	104.323	236.041	93.0726	210.509		0.000105223	0.00010519	0.00010519	0.000105179	0.00010528	0.000105247	0.000105247	0.000105235		0.105224	3.50798e-05
52671	311	48249	Texas	Jim Wells County	-379.609	-866.58	-338.84	-773.24	103.778	236.906	92.6323	211.389		0.000104673	0.000105576	0.000104692	0.000105618	0.00010473	0.000105633	0.000104749	0.000105675		0.105168	0.000489979
54782	2422	21029	Kentucky	Bullitt County	-380.371	-863.428	-339.651	-770.639	103.986	236.045	92.8542	210.678		0.000104883	0.000105192	0.000104943	0.000105263	0.00010494	0.000105249	0.000105	0.00010532		0.105099	0.000174253
55181	2821	36109	New York	Tompkins County	-381.219	-861.466	-340.198	-768.331	104.218	235.509	93.0039	210.047		0.000105117	0.000104953	0.000105112	0.000104948	0.000105174	0.00010501	0.000105169	0.000105005		0.105061	9.31119e-05
54935	2575	36019	New York	Clinton County	-381.499	-860.654	-340.424	-767.572	104.295	235.287	93.0657	209.84		0.000105194	0.000104854	0.000105182	0.000104844	0.000105251	0.000104911	0.000105239	0.000104901		0.105047	0.000183996
54545	2185	26107	Michigan	Mecosta County	-380.163	-861.43	-339.173	-768.326	103.929	235.498	92.7233	210.046		0.000104826	0.000104948	0.000104795	0.000104947	0.000104882	0.000105005	0.000104852	0.000105004		0.104907	8.00997e-05
52778	418	8071	Colorado	Las Animas County	-380.809	-860.157	-339.623	-766.875	104.105	235.148	92.8454	209.646		0.000105004	0.000104793	0.000104935	0.000104749	0.000105059	0.000104849	0.00010499	0.000104804		0.104898	0.000114402
55301	2941	55125	Wisconsin	Vilas County	-380.247	-859.064	-339.135	-766.151	103.952	234.851	92.7128	209.451		0.000104849	0.00010466	0.000104784	0.00010465	0.000104906	0.000104716	0.00010484	0.000104706		0.104764	9.47872e-05
52599	239	6043	California	Mariposa County	-379.186	-854.538	-338.149	-761.834	103.66	233.608	92.4411	208.265		0.000104557	0.000104109	0.000104479	0.00010406	0.00010461	0.000104162	0.000104533	0.000104114		0.104328	0.000236019
53941	1581	27115	Minnesota	Pine County	-378.279	-853.191	-337.474	-760.844	103.414	233.245	92.2585	207.999		0.000104307	0.000103945	0.00010427	0.000103925	0.000104362	0.000104	0.000104326	0.000103981		0.104139	0.00019199
52672	312	51191	Virginia	Washington County	-377.413	-852.102	-336.607	-759.792	103.178	232.949	92.022	207.713		0.000104068	0.000103812	0.000104002	0.000103781	0.000104124	0.000103868	0.000104059	0.000103838		0.103944	0.000133801
53582	1222	17137	Illinois	Morgan County	-377.219	-852.269	-336.512	-760.12	103.124	232.994	91.9958	207.802		0.000104014	0.000103832	0.000103973	0.000103826	0.00010407	0.000103888	0.000104029	0.000103882		0.103939	9.42711e-05
52779	419	37049	North Carolina	Craven County	-376.694	-853.235	-336.068	-760.889	102.981	233.259	91.8749	208.013		0.000103869	0.00010395	0.000103836	0.000103931	0.000103926	0.000104007	0.000103892	0.000103988		0.103925	5.77271e-05
54936	2576	24001	Maryland	Allegany County	-376.618	-852.894	-335.938	-760.543	102.96	233.165	91.8393	207.918		0.000103849	0.000103908	0.000103796	0.000103884	0.000103905	0.000103965	0.000103852	0.00010394		0.103887	5.43238e-05
52528	168	48217	Texas	Hill County	-376.093	-851.035	-335.49	-759.028	102.817	232.657	91.7165	207.504		0.000103704	0.000103682	0.000103657	0.000103677	0.00010376	0.000103738	0.000103713	0.000103733		0.103708	3.47337e-05
54108	1748	26089	Michigan	Leelanau County	-376.397	-849.797	-335.615	-757.727	102.9	232.318	91.7507	207.148		0.000103788	0.000103531	0.000103696	0.000103499	0.000103843	0.000103587	0.000103752	0.000103555		0.103656	0.000130036
55182	2822	26165	Michigan	Wexford County	-374.993	-850.991	-334.587	-759.341	102.516	232.645	91.4696	207.589		0.000103401	0.000103677	0.000103378	0.00010372	0.000103456	0.000103733	0.000103434	0.000103776		0.103572	0.000168726
52780	420	1121	Alabama	Talladega County	-375.395	-850.083	-334.878	-758.039	102.626	232.397	91.5496	207.234		0.000103511	0.000103566	0.000103468	0.000103542	0.000103567	0.000103622	0.000103524	0.000103598		0.10355	4.92477e-05
53583	1223	26033	Michigan	Chippewa County	-374.915	-850.145	-334.558	-758.495	102.495	232.413	91.4617	207.358		0.000103379	0.000103573	0.00010337	0.000103604	0.000103435	0.000103629	0.000103425	0.00010366		0.103509	0.00011912
53942	1582	13021	Georgia	Bibb County	-374.6	-849.615	-334.241	-757.68	102.409	232.269	91.3755	207.136		0.000103292	0.000103509	0.000103272	0.000103493	0.000103348	0.000103565	0.000103328	0.000103549		0.103419	0.000121297
54333	1973	19011	Iowa	Benton County	-375.431	-846.928	-334.939	-755.334	102.635	231.533	91.5655	206.493		0.000103521	0.000103182	0.000103487	0.000103172	0.000103577	0.000103237	0.000103542	0.000103228		0.103368	0.000177875
54937	2577	26101	Michigan	Manistee County	-373.825	-846.395	-333.409	-754.952	102.197	231.388	91.1475	206.389		0.000103079	0.000103117	0.000103014	0.00010312	0.000103134	0.000103172	0.00010307	0.000103176		0.10311	5.43478e-05
54938	2578	26109	Michigan	Menominee County	-374.117	-845.014	-333.599	-753.426	102.276	231.01	91.1995	205.972		0.000103159	0.000102948	0.000103073	0.000102912	0.000103214	0.000103004	0.000103129	0.000102967		0.103051	0.000109585
55183	2823	36043	New York	Herkimer County	-372.955	-843.544	-332.642	-752.102	101.959	230.609	90.9382	205.611		0.000102839	0.000102769	0.000102778	0.000102731	0.000102894	0.000102825	0.000102833	0.000102787		0.102807	5.09242e-05
53664	1304	48493	Texas	Wilson County	-372.331	-843.768	-332.23	-752.741	101.788	230.67	90.8254	205.785		0.000102667	0.000102797	0.00010265	0.000102818	0.000102722	0.000102852	0.000102705	0.000102874		0.102761	8.56612e-05
52900	540	27147	Minnesota	Steele County	-373.194	-841.441	-333.04	-750.522	102.024	230.033	91.0464	205.177		0.000102904	0.000102513	0.000102901	0.000102515	0.000102959	0.000102568	0.000102955	0.00010257		0.102736	0.000209698
52781	421	19021	Iowa	Buena Vista County	-372.761	-841.823	-332.616	-750.861	101.905	230.137	90.9303	205.27		0.000102785	0.00010256	0.000102769	0.000102561	0.00010284	0.000102614	0.000102824	0.000102616		0.102696	0.000119635
55425	3065	17063	Illinois	Grundy County	-372.028	-840.924	-332.101	-750.281	101.705	229.892	90.7901	205.112		0.000102583	0.00010245	0.00010261	0.000102482	0.000102638	0.000102505	0.000102666	0.000102537		0.102559	7.7389e-05
54017	1657	48233	Texas	Hutchinson County	-371.822	-840.188	-331.725	-749.254	101.649	229.69	90.6867	204.831		0.000102526	0.00010236	0.000102494	0.000102342	0.000102581	0.000102415	0.000102549	0.000102397		0.102458	9.09564e-05
53245	885	48147	Texas	Fannin County	-371.279	-840.755	-331.182	-749.877	101.501	229.846	90.5388	205.002		0.000102377	0.000102429	0.000102326	0.000102427	0.000102432	0.000102485	0.000102381	0.000102482		0.102417	5.40258e-05
52782	422	45077	South Carolina	Pickens County	-370.013	-841.032	-330.179	-750.147	101.155	229.923	90.2649	205.076		0.000102027	0.000102463	0.000102017	0.000102464	0.000102083	0.000102519	0.000102072	0.000102519		0.10227	0.00023807
54483	2123	31041	Nebraska	Custer County	-371.496	-837.228	-331.289	-746.444	101.559	228.88	90.5674	204.062		0.000102436	0.000102	0.000102359	0.000101958	0.000102491	0.000102054	0.000102414	0.000102012		0.102216	0.000228182
54095	1735	42015	Pennsylvania	Bradford County	-370.568	-837.413	-330.507	-746.727	101.307	228.933	90.3544	204.141		0.000102181	0.000102022	0.000102118	0.000101997	0.000102236	0.000102078	0.000102173	0.000102052		0.102107	8.42779e-05
52432	72	30043	Montana	Jefferson County	-370.267	-837.815	-330.346	-747.29	101.223	229.04	90.3093	204.292		0.000102097	0.000102071	0.000102068	0.000102074	0.000102151	0.000102125	0.000102122	0.000102127		0.102105	3.12839e-05
53246	886	38079	North Dakota	Rolette County	-370.1	-837.276	-330.22	-746.717	101.177	228.893	90.275	204.136		0.000102051	0.000102006	0.000102029	0.000101995	0.000102105	0.00010206	0.000102083	0.00010205		0.102047	3.70631e-05
54254	1894	38071	North Dakota	Ramsey County	-370.07	-837.121	-330.086	-746.556	101.169	228.851	90.2386	204.092		0.000102043	0.000101987	0.000101988	0.000101973	0.000102097	0.000102041	0.000102042	0.000102028		0.102025	4.07207e-05
54783	2423	24017	Maryland	Charles County	-370.233	-836.15	-330.416	-745.642	101.215	228.588	90.3296	203.845		0.000102088	0.000101868	0.00010209	0.000101848	0.000102143	0.000101924	0.000102145	0.000101904		0.102001	0.000126837
52600	240	40039	Oklahoma	Custer County	-369.273	-838.053	-329.493	-747.417	100.952	229.107	90.0767	204.329		0.000101823	0.0001021	0.000101804	0.000102091	0.000101878	0.000102155	0.000101859	0.000102146		0.101982	0.000153705
55113	2753	31089	Nebraska	Holt County	-370.164	-834.104	-330.15	-743.738	101.195	228.026	90.2561	203.322		0.000102069	0.000101619	0.000102008	0.000101588	0.000102123	0.000101673	0.000102062	0.000101643		0.101848	0.000235476
54334	1974	40111	Oklahoma	Okmulgee County	-368.468	-835.388	-328.674	-744.916	100.732	228.379	89.8529	203.645		0.000101601	0.000101776	0.000101551	0.000101749	0.000101656	0.00010183	0.000101606	0.000101804		0.101697	0.000105879
55139	2779	20035	Kansas	Cowley County	-369.092	-833.749	-329.23	-743.393	100.902	227.93	90.005	203.229		0.000101773	0.000101576	0.000101723	0.000101541	0.000101828	0.000101631	0.000101778	0.000101596		0.101681	0.000108036
53584	1224	27153	Minnesota	Todd County	-369.164	-832.286	-329.316	-742.177	100.922	227.53	90.0281	202.896		0.000101793	0.000101398	0.00010175	0.000101375	0.000101847	0.000101452	0.000101804	0.000101429		0.101606	0.000208634
53943	1583	42121	Pennsylvania	Venango County	-367.769	-833.171	-328.014	-743.046	100.541	227.773	89.6728	203.135		0.000101409	0.000101506	0.000101347	0.000101494	0.000101463	0.000101561	0.000101402	0.000101549		0.101466	7.52118e-05
52469	109	26023	Michigan	Branch County	-367.471	-831.04	-327.884	-741.306	100.46	227.191	89.6372	202.659		0.000101327	0.000101246	0.000101307	0.000101256	0.000101381	0.000101301	0.000101362	0.000101311		0.101311	4.64495e-05
53049	689	13115	Georgia	Floyd County	-367.287	-830.449	-327.739	-740.644	100.41	227.03	89.5979	202.479		0.000101276	0.000101174	0.000101263	0.000101166	0.000101331	0.000101229	0.000101318	0.000101221		0.101247	6.09046e-05
53247	887	27103	Minnesota	Nicollet County	-367.321	-829.311	-327.848	-739.727	100.418	226.717	89.6268	202.226		0.000101285	0.000101035	0.000101296	0.00010104	0.000101339	0.000101089	0.00010135	0.000101095		0.101191	0.000138225
53359	999	16077	Idaho	Power County	-366.884	-829.36	-327.567	-739.971	100.296	226.724	89.5479	202.288		0.000101165	0.000101041	0.000101209	0.000101074	0.000101216	0.000101093	0.000101261	0.000101125		0.101148	7.73701e-05
53665	1305	47059	Tennessee	Greene County	-366.7	-829.963	-327.097	-740.193	100.249	226.897	89.4221	202.355		0.000101114	0.000101115	0.000101064	0.000101104	0.000101168	0.00010117	0.000101119	0.000101159		0.101127	3.6702e-05
54018	1658	5093	Arkansas	Mississippi County	-366.096	-828.744	-326.614	-739.046	100.084	226.563	89.2901	202.041		0.000100947	0.000100966	0.000100915	0.000100947	0.000101002	0.000101021	0.000100969	0.000101002		0.100971	3.52029e-05
54131	1771	48373	Texas	Polk County	-363.008	-832.446	-323.788	-742.274	99.2396	227.575	88.5176	202.924		0.000100096	0.000101417	0.000100042	0.000101388	0.00010015	0.000101472	0.000100096	0.000101443		0.100763	0.000714256
54335	1975	19059	Iowa	Dickinson County	-365.521	-824.594	-326.04	-735.427	99.9258	225.427	89.1326	201.05		0.000100789	0.000100461	0.000100738	0.000100453	0.000100842	0.000100514	0.000100791	0.000100507		0.100637	0.000167364
54484	2124	37157	North Carolina	Rockingham County	-364.506	-825.106	-325.136	-735.838	99.6494	225.569	88.8861	201.165		0.000100509	0.000100523	0.000100458	0.000100509	0.000100563	0.000100578	0.000100513	0.000100564		0.100527	3.9355e-05
54546	2186	26151	Michigan	Sanilac County	-364.676	-824.661	-325.297	-735.503	99.6955	225.446	88.9301	201.073		0.000100556	0.000100469	0.000100508	0.000100464	0.00010061	0.000100523	0.000100562	0.000100518		0.100526	4.90008e-05
54713	2353	26007	Michigan	Alpena County	-363.74	-824.616	-324.429	-735.683	99.4394	225.434	88.6925	201.122		0.000100298	0.000100463	0.00010024	0.000100488	0.000100351	0.000100518	0.000100294	0.000100542		0.100399	0.000116903
55264	2904	13139	Georgia	Hall County	-364.2	-822.864	-325.06	-734.007	99.5656	224.956	88.8655	200.664		0.000100425	0.00010025	0.000100435	0.000100259	0.000100479	0.000100304	0.000100489	0.000100314		0.100369	9.81841e-05
55302	2942	19085	Iowa	Harrison County	-364.48	-821.588	-325.032	-732.52	99.6413	224.605	88.857	200.256		0.000100502	0.000100094	0.000100426	0.000100056	0.000100555	0.000100148	0.00010048	0.00010011		0.100296	0.000212188
55367	3007	39147	Ohio	Seneca County	-363.468	-822.522	-324.248	-733.59	99.3652	224.862	88.6433	200.55		0.000100223	0.000100208	0.000100184	0.000100202	0.000100277	0.000100262	0.000100238	0.000100257		0.100231	3.24886e-05
53460	1100	29167	Missouri	Polk County	-363.422	-822.424	-324.198	-733.431	99.3523	224.835	88.6294	200.506		0.00010021	0.000100196	0.000100169	0.000100181	0.000100264	0.00010025	0.000100222	0.000100234		0.100216	3.32785e-05
54255	1895	28067	Mississippi	Jones County	-361.715	-820.496	-322.743	-731.724	98.8863	224.309	88.2321	200.04		9.97392e-05	9.99614e-05	9.9719e-05	9.99474e-05	9.97933e-05	0.000100016	9.9773e-05	0.000100002		0.0998689	0.000124318
53585	1225	53043	Washington	Lincoln County	-362.843	-817.652	-323.599	-729.01	99.1934	223.528	88.4648	199.295		0.00010005	9.96148e-05	9.99834e-05	9.95766e-05	0.000100103	9.96677e-05	0.000100036	9.96295e-05		0.0998327	0.00022872
53360	1000	19141	Iowa	O'Brien County	-361.401	-814.716	-322.335	-726.5	98.7994	222.726	88.1197	198.61		9.96526e-05	9.92572e-05	9.95929e-05	9.92338e-05	9.97056e-05	9.93102e-05	9.96459e-05	9.92868e-05		0.0994606	0.000205064
53248	888	26063	Michigan	Huron County	-360.44	-814.691	-321.45	-726.561	98.5374	222.721	87.8783	198.628		9.93877e-05	9.92541e-05	9.93195e-05	9.92421e-05	9.94412e-05	9.93077e-05	9.93729e-05	9.92957e-05		0.0993276	6.84366e-05
54939	2579	51700	Virginia	Newport News city	-360.013	-814.656	-321.442	-726.777	98.421	222.712	87.8764	198.688		9.927e-05	9.92499e-05	9.9317e-05	9.92717e-05	9.93238e-05	9.93039e-05	9.93708e-05	9.93257e-05		0.0993041	3.89746e-05
55265	2905	39087	Ohio	Lawrence County	-359.848	-814.091	-320.871	-725.722	98.3758	222.557	87.7202	198.399		9.92246e-05	9.9181e-05	9.91406e-05	9.91275e-05	9.92782e-05	9.92348e-05	9.91941e-05	9.91813e-05		0.0991953	4.9682e-05
53361	1001	26053	Michigan	Gogebic County	-359.156	-810.82	-320.216	-722.84	98.1861	221.662	87.5406	197.61		9.90336e-05	9.87825e-05	9.89381e-05	9.87339e-05	9.90866e-05	9.88356e-05	9.89911e-05	9.8787e-05		0.0988986	0.000131338
54940	2580	1051	Alabama	Elmore County	-358.292	-810.718	-319.734	-723.088	97.9508	221.636	87.4095	197.679		9.87955e-05	9.87701e-05	9.87892e-05	9.87678e-05	9.88492e-05	9.8824e-05	9.88429e-05	9.88216e-05		0.0988075	3.14265e-05
55184	2824	39037	Ohio	Darke County	-357.338	-807.963	-318.761	-720.595	97.6894	220.882	87.1434	196.997		9.85323e-05	9.84345e-05	9.84888e-05	9.84272e-05	9.85855e-05	9.84879e-05	9.85419e-05	9.84805e-05		0.0984973	5.38368e-05
53249	889	19109	Iowa	Kossuth County	-357.785	-806.868	-319.1	-719.515	97.8109	220.581	87.2352	196.701		9.86555e-05	9.83011e-05	9.85932e-05	9.82798e-05	9.8708e-05	9.83537e-05	9.86458e-05	9.83323e-05		0.0984837	0.000182388
54019	1659	48013	Texas	Atascosa County	-356.28	-809.044	-318.036	-721.927	97.4001	221.177	86.9449	197.361		9.82406e-05	9.85662e-05	9.82646e-05	9.86092e-05	9.82935e-05	9.86195e-05	9.83175e-05	9.86625e-05		0.0984467	0.000182426
53362	1002	36113	New York	Warren County	-357.097	-804.465	-318.515	-717.332	97.6238	219.926	87.0761	196.105		9.84659e-05	9.80083e-05	9.84125e-05	9.79815e-05	9.85192e-05	9.80616e-05	9.84658e-05	9.80348e-05		0.0982437	0.000240263
55368	3008	5063	Arkansas	Independence County	-356.122	-806.464	-317.716	-719.234	97.3571	220.472	86.8574	196.625		9.81972e-05	9.82518e-05	9.81656e-05	9.82414e-05	9.825e-05	9.8305e-05	9.82185e-05	9.82945e-05		0.0982405	4.66921e-05
55369	3009	6049	California	Modoc County	-356.615	-803.174	-317.985	-715.961	97.4909	219.571	86.9303	195.729		9.83329e-05	9.7851e-05	9.82488e-05	9.77943e-05	9.83851e-05	9.79032e-05	9.8301e-05	9.78464e-05		0.0980828	0.000254727
55303	2943	37045	North Carolina	Cleveland County	-355.185	-805.26	-316.85	-718.165	97.1012	220.143	86.621	196.333		9.79388e-05	9.81051e-05	9.78982e-05	9.80953e-05	9.79918e-05	9.81584e-05	9.79512e-05	9.81486e-05		0.0980359	0.000102492
52392	32	21083	Kentucky	Graves County	-354.994	-804.083	-316.707	-717.199	97.0488	219.821	86.5816	196.069		9.78861e-05	9.79618e-05	9.78539e-05	9.79633e-05	9.79389e-05	9.80149e-05	9.79067e-05	9.80164e-05		0.0979428	5.83507e-05
52470	110	40089	Oklahoma	McCurtain County	-354.088	-805.667	-315.824	-718.369	96.801	220.254	86.3404	196.389		9.76363e-05	9.81548e-05	9.75813e-05	9.81232e-05	9.76889e-05	9.82079e-05	9.76338e-05	9.81763e-05		0.0979003	0.000285962
52783	423	30001	Montana	Beaverhead County	-353.981	-805.22	-315.824	-718.199	96.7702	220.129	86.3389	196.339		9.76066e-05	9.81003e-05	9.75811e-05	9.81e-05	9.76578e-05	9.81519e-05	9.76322e-05	9.81516e-05		0.0978727	0.00027231
52951	591	42001	Pennsylvania	Adams County	-354.344	-803.651	-316.082	-716.756	96.8711	219.704	86.411	195.948		9.77067e-05	9.79092e-05	9.76608e-05	9.79028e-05	9.77596e-05	9.79624e-05	9.77137e-05	9.7956e-05		0.0978214	0.000123458
53050	690	35053	New Mexico	Socorro County	-350.959	-809.587	-313.127	-722.025	95.9442	221.323	85.6019	197.385		9.67733e-05	9.86323e-05	9.67478e-05	9.86226e-05	9.68242e-05	9.86844e-05	9.67988e-05	9.86747e-05		0.0977198	0.000998644
53151	791	22009	Louisiana	Avoyelles Parish	-353.228	-798.928	-315.11	-712.407	96.5661	218.412	86.1454	194.759		9.73991e-05	9.73337e-05	9.73607e-05	9.73088e-05	9.74518e-05	9.73866e-05	9.74134e-05	9.73617e-05		0.097377	4.55409e-05
53747	1387	30023	Montana	Deer Lodge County	-352.862	-799.069	-314.656	-712.436	96.4647	218.448	86.0201	194.764		9.72983e-05	9.73509e-05	9.72204e-05	9.73127e-05	9.73495e-05	9.74024e-05	9.72717e-05	9.73642e-05		0.0973213	5.77342e-05
53847	1487	54003	West Virginia	Berkeley County	-352.173	-797.195	-314.341	-711.267	96.2775	217.938	85.935	194.447		9.7108e-05	9.71225e-05	9.71228e-05	9.71531e-05	9.71606e-05	9.71753e-05	9.71754e-05	9.72059e-05		0.097153	3.32089e-05
54174	1814	48471	Texas	Walker County	-351.294	-798.219	-313.646	-712.341	96.0371	218.218	85.745	194.741		9.68658e-05	9.72474e-05	9.69084e-05	9.72998e-05	9.6918e-05	9.73001e-05	9.69607e-05	9.73525e-05		0.0971066	0.000210185
54256	1896	19047	Iowa	Crawford County	-352.215	-794.905	-314.192	-708.874	96.2882	217.31	85.8934	193.791		9.71197e-05	9.68436e-05	9.70768e-05	9.68262e-05	9.71714e-05	9.68953e-05	9.71285e-05	9.6878e-05		0.0969924	0.000144499
54398	2038	38099	North Dakota	Walsh County	-351.135	-793.574	-313.18	-707.713	95.9929	216.946	85.6167	193.474		9.6822e-05	9.66814e-05	9.67642e-05	9.66677e-05	9.68734e-05	9.6733e-05	9.68156e-05	9.67192e-05		0.0967595	7.26036e-05
54600	2240	1049	Alabama	DeKalb County	-350.871	-793.806	-313.05	-707.92	95.9218	217.012	85.5822	193.532		9.67492e-05	9.67097e-05	9.67241e-05	9.66959e-05	9.68016e-05	9.67623e-05	9.67765e-05	9.67485e-05		0.096746	3.50818e-05
54784	2424	12001	Florida	Alachua County	-350.023	-793.363	-312.418	-707.605	95.6902	216.891	85.4094	193.446		9.65155e-05	9.66558e-05	9.65287e-05	9.66528e-05	9.65679e-05	9.67085e-05	9.65812e-05	9.67055e-05		0.0966145	7.62999e-05
55185	2825	28151	Mississippi	Washington County	-350.082	-791.727	-312.487	-706.166	95.7061	216.444	85.4283	193.053		9.65317e-05	9.64564e-05	9.65503e-05	9.64563e-05	9.65839e-05	9.65088e-05	9.66025e-05	9.65087e-05		0.0965248	5.35985e-05
52433	73	48321	Texas	Matagorda County	-349.776	-792.451	-312.088	-706.84	95.6222	216.641	85.3189	193.237		9.64472e-05	9.65446e-05	9.64268e-05	9.65484e-05	9.64992e-05	9.6597e-05	9.64788e-05	9.66008e-05		0.0965178	6.54054e-05
55186	2826	9015	Connecticut	Windham County	-349.487	-791.048	-311.864	-705.66	95.5435	216.258	85.2578	192.915		9.63676e-05	9.63737e-05	9.63575e-05	9.63872e-05	9.64199e-05	9.64262e-05	9.64097e-05	9.64396e-05		0.0963977	3.0264e-05
53363	1003	29001	Missouri	Adair County	-348.816	-792.769	-311.16	-706.928	95.3593	216.727	85.065	193.26		9.61825e-05	9.65834e-05	9.61403e-05	9.65604e-05	9.6234e-05	9.66353e-05	9.61917e-05	9.66124e-05		0.0963925	0.000222031
54665	2305	18093	Indiana	Lawrence County	-348.686	-789.787	-311.052	-704.374	95.3242	215.913	85.0357	192.563		9.61466e-05	9.62201e-05	9.61067e-05	9.62115e-05	9.61985e-05	9.62723e-05	9.61585e-05	9.62637e-05		0.0961972	5.73573e-05
53250	890	37155	North Carolina	Robeson County	-346.366	-791.707	-309.129	-706.335	94.6903	216.438	84.5102	193.099		9.5507e-05	9.6454e-05	9.55125e-05	9.64794e-05	9.55588e-05	9.65065e-05	9.55643e-05	9.6532e-05		0.0960143	0.000512576
54666	2306	39077	Ohio	Huron County	-347.937	-788.035	-310.47	-703.095	95.1194	215.434	84.8767	192.213		9.59401e-05	9.60066e-05	9.5927e-05	9.60369e-05	9.59918e-05	9.60586e-05	9.59788e-05	9.60889e-05		0.0960036	5.61652e-05
54485	2125	16071	Idaho	Oneida County	-347.709	-784.284	-310.18	-699.427	95.0538	214.401	84.7946	191.204		9.58772e-05	9.55497e-05	9.58374e-05	9.55359e-05	9.59257e-05	9.55981e-05	9.58859e-05	9.55843e-05		0.0957243	0.000170848
54941	2581	17085	Illinois	Jo Daviess County	-347.104	-784.03	-309.649	-699.361	94.8914	214.338	84.6519	191.191		9.57104e-05	9.55187e-05	9.56732e-05	9.55269e-05	9.57617e-05	9.55701e-05	9.57245e-05	9.55783e-05		0.095633	9.54904e-05
54714	2354	19017	Iowa	Bremer County	-346.942	-783.85	-309.525	-699.106	94.847	214.289	84.618	191.121		9.56658e-05	9.54967e-05	9.56351e-05	9.5492e-05	9.57169e-05	9.5548e-05	9.56862e-05	9.55432e-05		0.095598	8.85723e-05
53748	1388	40065	Oklahoma	Jackson County	-346.566	-784.734	-309.192	-699.799	94.7443	214.531	84.527	191.311		9.5562e-05	9.56044e-05	9.5532e-05	9.55867e-05	9.56133e-05	9.56559e-05	9.55833e-05	9.56382e-05		0.095597	4.00476e-05
54336	1976	47031	Tennessee	Coffee County	-345.933	-785.426	-308.612	-700.493	94.5717	214.721	84.3687	191.502		9.53875e-05	9.56888e-05	9.53528e-05	9.56814e-05	9.54391e-05	9.57408e-05	9.54043e-05	9.57334e-05		0.0955535	0.000171255
54942	2582	12019	Florida	Clay County	-346.238	-784.569	-308.967	-699.782	94.6554	214.487	84.4661	191.308		9.54717e-05	9.55844e-05	9.54625e-05	9.55843e-05	9.55236e-05	9.56366e-05	9.55144e-05	9.56365e-05		0.0955517	6.8717e-05
52952	592	34041	New Jersey	Warren County	-346.014	-781.161	-308.694	-696.674	94.5938	213.555	84.3912	190.458		9.54098e-05	9.51691e-05	9.53781e-05	9.51599e-05	9.54615e-05	9.52209e-05	9.54297e-05	9.52116e-05		0.0953051	0.000126315
53152	792	56031	Wyoming	Platte County	-345.609	-779.336	-308.208	-694.784	94.4814	213.052	84.257	189.938		9.52982e-05	9.49468e-05	9.52282e-05	9.49017e-05	9.5348e-05	9.49966e-05	9.5278e-05	9.49515e-05		0.0951186	0.000185791
53848	1488	37023	North Carolina	Burke County	-344.622	-779.938	-307.43	-695.576	94.2132	213.221	84.0456	190.158		9.5026e-05	9.50202e-05	9.49876e-05	9.50099e-05	9.50774e-05	9.50718e-05	9.5039e-05	9.50615e-05		0.0950367	3.16903e-05
54785	2425	18065	Indiana	Henry County	-343.852	-780.419	-306.714	-695.97	94.0027	213.352	83.8498	190.265		9.48138e-05	9.50788e-05	9.47664e-05	9.50637e-05	9.48649e-05	9.51303e-05	9.48175e-05	9.51152e-05		0.0949563	0.000154011
54132	1772	48503	Texas	Young County	-343.934	-776.727	-306.703	-692.484	94.0249	212.342	83.8466	189.312		9.48364e-05	9.4629e-05	9.4763e-05	9.45876e-05	9.48873e-05	9.468e-05	9.48139e-05	9.46386e-05		0.0947295	0.000110546
54943	2583	28035	Mississippi	Forrest County	-342.935	-777.73	-306.161	-693.742	93.7523	212.617	83.699	189.657		9.4561e-05	9.47512e-05	9.45957e-05	9.47593e-05	9.46123e-05	9.48028e-05	9.4647e-05	9.48109e-05		0.0946925	9.9476e-05
54399	2039	40123	Oklahoma	Pontotoc County	-341.939	-779.633	-305.088	-695.303	93.4794	213.137	83.405	190.082		9.42862e-05	9.4983e-05	9.42639e-05	9.49726e-05	9.43368e-05	9.50343e-05	9.43146e-05	9.50238e-05		0.0946519	0.000376886
54257	1897	38003	North Dakota	Barnes County	-342.954	-775.412	-305.862	-691.485	93.7564	211.981	83.6161	189.037		9.45662e-05	9.44687e-05	9.45031e-05	9.4451e-05	9.46163e-05	9.4519e-05	9.45532e-05	9.45013e-05		0.0945224	5.41124e-05
52673	313	31043	Nebraska	Dakota County	-342.816	-773.589	-305.885	-689.867	93.7187	211.483	83.6226	188.595		9.45281e-05	9.42466e-05	9.45105e-05	9.423e-05	9.45783e-05	9.42969e-05	9.45606e-05	9.42802e-05		0.0944039	0.000152813
52601	241	27001	Minnesota	Aitkin County	-343.076	-773.297	-305.929	-689.485	93.7901	211.404	83.6347	188.491		9.45999e-05	9.42111e-05	9.45239e-05	9.41779e-05	9.46503e-05	9.42616e-05	9.45743e-05	9.42283e-05		0.0944034	0.00020068
53153	793	5139	Arkansas	Union County	-341.402	-775.186	-304.527	-691.243	93.3331	211.921	83.2521	188.973		9.41383e-05	9.44412e-05	9.40907e-05	9.4418e-05	9.41892e-05	9.44925e-05	9.41416e-05	9.44693e-05		0.0942976	0.000171888
52784	424	19157	Iowa	Poweshiek County	-342.218	-773.361	-305.211	-689.582	93.5554	211.421	83.4385	188.518		9.43631e-05	9.42188e-05	9.4302e-05	9.41912e-05	9.44135e-05	9.42694e-05	9.43524e-05	9.42417e-05		0.094294	7.75456e-05
54715	2355	30053	Montana	Lincoln County	-341.699	-771.824	-304.725	-688.23	93.4138	211.002	83.3058	188.148		9.42201e-05	9.40317e-05	9.41519e-05	9.40064e-05	9.42706e-05	9.40824e-05	9.42024e-05	9.4057e-05		0.0941278	9.71839e-05
52785	425	26029	Michigan	Charlevoix County	-341.673	-771.397	-304.753	-687.904	93.4069	210.885	83.3135	188.06		9.4213e-05	9.39796e-05	9.41604e-05	9.39619e-05	9.42637e-05	9.40304e-05	9.42111e-05	9.40127e-05		0.0941041	0.000120377
52393	33	29225	Missouri	Webster County	-340.97	-771.998	-304.243	-688.537	93.2145	211.049	83.1741	188.233		9.4019e-05	9.40529e-05	9.4003e-05	9.40484e-05	9.40695e-05	9.41036e-05	9.40535e-05	9.40991e-05		0.0940561	3.4949e-05
54944	2584	48073	Texas	Cherokee County	-339.87	-770.81	-303.258	-687.474	92.9141	210.725	82.9051	187.942		9.37158e-05	9.39081e-05	9.36987e-05	9.39031e-05	9.37664e-05	9.3959e-05	9.37492e-05	9.3954e-05		0.0938318	0.000109748
54258	1898	17135	Illinois	Montgomery County	-340.475	-769.297	-303.72	-686.105	93.0793	210.311	83.0312	187.568		9.38826e-05	9.37237e-05	9.38414e-05	9.37162e-05	9.39331e-05	9.37743e-05	9.38918e-05	9.37668e-05		0.0938162	8.21041e-05
55187	2827	39167	Ohio	Washington County	-339.264	-766.633	-302.597	-683.609	92.7484	209.583	82.7243	186.886		9.35486e-05	9.33992e-05	9.34943e-05	9.33752e-05	9.35991e-05	9.34499e-05	9.35448e-05	9.34259e-05		0.0934796	7.98425e-05
52786	426	55067	Wisconsin	Langlade County	-339.702	-765.581	-302.938	-682.518	92.8679	209.295	82.8173	186.587		9.36695e-05	9.3271e-05	9.35998e-05	9.32262e-05	9.37197e-05	9.33212e-05	9.36499e-05	9.32764e-05		0.0934667	0.000210442
54020	1660	47043	Tennessee	Dickson County	-338.712	-766.127	-302.24	-683.394	92.5977	209.445	82.6267	186.827		9.33966e-05	9.33376e-05	9.3384e-05	9.33459e-05	9.3447e-05	9.33882e-05	9.34345e-05	9.33965e-05		0.0933913	3.78517e-05
54945	2585	34019	New Jersey	Hunterdon County	-339.477	-763.991	-302.883	-681.281	92.8068	208.861	82.8028	186.25		9.36073e-05	9.30773e-05	9.35829e-05	9.30573e-05	9.3658e-05	9.3128e-05	9.36336e-05	9.31079e-05		0.0933565	0.000283673
54786	2426	30005	Montana	Blaine County	-337.749	-765.722	-301.413	-682.989	92.3328	209.331	82.3994	186.714		9.31308e-05	9.32882e-05	9.31285e-05	9.32906e-05	9.31797e-05	9.33374e-05	9.31775e-05	9.33398e-05		0.0932341	8.94002e-05
52674	314	16039	Idaho	Elmore County	-337.54	-765.328	-301.346	-682.723	92.2762	209.224	82.3815	186.642		9.30734e-05	9.32402e-05	9.3108e-05	9.32543e-05	9.31226e-05	9.32897e-05	9.31572e-05	9.33038e-05		0.0931936	8.89511e-05
52953	593	17075	Illinois	Iroquois County	-338.111	-763.344	-301.569	-680.743	92.433	208.683	82.4431	186.102		9.32306e-05	9.29985e-05	9.31767e-05	9.29838e-05	9.32808e-05	9.30487e-05	9.32268e-05	9.3034e-05		0.0931225	0.000118611
53051	691	26031	Michigan	Cheboygan County	-337.858	-763.072	-301.312	-680.464	92.3637	208.609	82.3728	186.025		9.31609e-05	9.29654e-05	9.30973e-05	9.29456e-05	9.32109e-05	9.30155e-05	9.31473e-05	9.29957e-05		0.0930673	9.97824e-05
53154	794	13295	Georgia	Walker County	-337.606	-763.428	-301.153	-680.757	92.2954	208.707	82.3296	186.107		9.30915e-05	9.30087e-05	9.30481e-05	9.29857e-05	9.31419e-05	9.30593e-05	9.30985e-05	9.30363e-05		0.0930587	5.07589e-05
53251	891	19065	Iowa	Fayette County	-337.738	-762.79	-301.245	-680.212	92.3306	208.531	82.3542	185.956		9.31277e-05	9.2931e-05	9.30766e-05	9.29112e-05	9.31775e-05	9.29808e-05	9.31263e-05	9.29611e-05		0.0930365	0.000102475
54021	1661	42083	Pennsylvania	McKean County	-336.064	-761.531	-299.736	-679.131	91.8737	208.188	81.9422	185.662		9.26664e-05	9.27776e-05	9.26103e-05	9.27635e-05	9.27164e-05	9.2828e-05	9.26604e-05	9.28139e-05		0.0927296	7.87711e-05
54175	1815	48133	Texas	Eastland County	-336.327	-760.418	-299.916	-677.93	91.9453	207.884	81.9912	185.333		9.27388e-05	9.2642e-05	9.2666e-05	9.25996e-05	9.27887e-05	9.26921e-05	9.27159e-05	9.26496e-05		0.0926866	6.02114e-05
54400	2040	29147	Missouri	Nodaway County	-334.558	-761.523	-298.489	-679.137	91.4613	208.185	81.6007	185.662		9.2251e-05	9.27767e-05	9.22251e-05	9.27644e-05	9.23002e-05	9.28264e-05	9.22742e-05	9.28141e-05		0.092529	0.000286209
54787	2427	17107	Illinois	Logan County	-335.732	-758.738	-299.503	-676.684	91.7827	207.424	81.8784	184.992		9.25748e-05	9.24374e-05	9.25386e-05	9.24293e-05	9.26245e-05	9.24872e-05	9.25883e-05	9.24792e-05		0.0925199	7.24224e-05
54946	2586	6021	California	Glenn County	-336.047	-757.883	-299.817	-675.774	91.8682	207.189	81.9636	184.742		9.26617e-05	9.23332e-05	9.26354e-05	9.23051e-05	9.27109e-05	9.23824e-05	9.26846e-05	9.23543e-05		0.0925084	0.000178604
54716	2356	20191	Kansas	Sumner County	-335.751	-757.495	-299.47	-675.386	91.7875	207.084	81.8692	184.637		9.25798e-05	9.2286e-05	9.25283e-05	9.2252e-05	9.26294e-05	9.23356e-05	9.25778e-05	9.23016e-05		0.0924363	0.000156415
53549	1189	19145	Iowa	Page County	-335.099	-755.587	-298.849	-673.718	91.6092	206.562	81.6991	184.181		9.24002e-05	9.20535e-05	9.23364e-05	9.20242e-05	9.24495e-05	9.21028e-05	9.23856e-05	9.20734e-05		0.0922282	0.00018002
53550	1190	5055	Arkansas	Greene County	-333.107	-757.035	-297.244	-675.223	91.065	206.959	81.2608	184.593		9.18508e-05	9.22299e-05	9.18403e-05	9.22297e-05	9.19003e-05	9.22798e-05	9.18898e-05	9.22797e-05		0.0920626	0.000207257
55304	2944	27059	Minnesota	Isanti County	-333.944	-753.822	-298.011	-672.324	91.2935	206.079	81.4701	183.8		9.20817e-05	9.18384e-05	9.20774e-05	9.18338e-05	9.21309e-05	9.18876e-05	9.21265e-05	9.1883e-05		0.0919824	0.000132755
55245	2885	31155	Nebraska	Saunders County	-333.756	-752.837	-297.804	-671.434	91.242	205.81	81.4132	183.556		9.203e-05	9.17184e-05	9.20134e-05	9.17122e-05	9.20789e-05	9.17673e-05	9.20622e-05	9.17611e-05		0.0918929	0.000165962
54667	2307	18099	Indiana	Marshall County	-333.094	-754.055	-297.258	-672.677	91.0615	206.144	81.2645	183.897		9.18473e-05	9.18669e-05	9.18446e-05	9.1882e-05	9.18968e-05	9.19166e-05	9.18941e-05	9.19317e-05		0.091885	3.11265e-05
52787	427	39083	Ohio	Knox County	-332.723	-754.477	-296.846	-673.084	90.9603	206.26	81.1521	184.009		9.1745e-05	9.19183e-05	9.17174e-05	9.19376e-05	9.17946e-05	9.19681e-05	9.17669e-05	9.19874e-05		0.0918544	0.000109281
52954	594	19035	Iowa	Cherokee County	-333.276	-751.545	-297.209	-670.107	91.1107	205.457	81.2508	183.193		9.18976e-05	9.1561e-05	9.18298e-05	9.1531e-05	9.19464e-05	9.16099e-05	9.18786e-05	9.15798e-05		0.0917293	0.000174065
53052	692	40009	Oklahoma	Beckham County	-331.736	-751.416	-296.002	-670.137	90.6899	205.422	80.921	183.202		9.14728e-05	9.15453e-05	9.14567e-05	9.15351e-05	9.15217e-05	9.15945e-05	9.15057e-05	9.15843e-05		0.091527	4.86923e-05
53155	795	21101	Kentucky	Henderson County	-331.601	-751.25	-295.894	-670.161	90.6533	205.378	80.8917	183.209		9.14355e-05	9.15251e-05	9.14232e-05	9.15383e-05	9.14848e-05	9.15747e-05	9.14725e-05	9.15879e-05		0.0915053	6.12003e-05
53364	1004	40049	Oklahoma	Garvin County	-331.163	-752.248	-295.397	-670.792	90.5336	205.65	80.7558	183.382		9.13149e-05	9.16467e-05	9.12698e-05	9.16246e-05	9.13639e-05	9.16962e-05	9.13189e-05	9.1674e-05		0.0914886	0.000186462
53507	1147	31013	Nebraska	Box Butte County	-332.085	-748.696	-296.258	-667.66	90.7844	204.677	80.9901	182.523		9.1569e-05	9.1214e-05	9.15357e-05	9.11967e-05	9.16171e-05	9.12621e-05	9.15838e-05	9.12449e-05		0.0914029	0.000187769
53749	1389	56037	Wyoming	Sweetwater County	-330.96	-750.982	-295.496	-669.86	90.3945	205.114	80.7082	182.957		9.12589e-05	9.14924e-05	9.13004e-05	9.14972e-05	9.12236e-05	9.14572e-05	9.1265e-05	9.1462e-05		0.0913696	0.000117647
54401	2041	37191	North Carolina	Wayne County	-330.916	-750.543	-295.26	-669.39	90.4665	205.185	80.7189	182.999		9.12468e-05	9.1439e-05	9.12276e-05	9.1433e-05	9.12963e-05	9.14888e-05	9.12771e-05	9.14828e-05		0.0913614	0.000109855
54788	2428	5035	Arkansas	Crittenden County	-330.582	-750.798	-294.993	-669.616	90.3749	205.254	80.6454	183.061		9.11546e-05	9.147e-05	9.11449e-05	9.1464e-05	9.12038e-05	9.15196e-05	9.1194e-05	9.15135e-05		0.0913331	0.000171781
55305	2945	22119	Louisiana	Webster Parish	-330.951	-749.563	-295.215	-668.381	90.4758	204.917	80.7062	182.723		9.12563e-05	9.13196e-05	9.12134e-05	9.12952e-05	9.13056e-05	9.13692e-05	9.12627e-05	9.13447e-05		0.0912958	5.05438e-05
54717	2357	50021	Vermont	Rutland County	-331.157	-748.597	-295.341	-667.464	90.5324	204.653	80.7407	182.472		9.13133e-05	9.12019e-05	9.12524e-05	9.11699e-05	9.13628e-05	9.12515e-05	9.13018e-05	9.12195e-05		0.0912591	6.37099e-05
55188	2828	21073	Kentucky	Franklin County	-330.519	-749.442	-294.897	-668.498	90.3578	204.883	80.6193	182.755		9.11373e-05	9.13048e-05	9.11153e-05	9.13112e-05	9.11866e-05	9.13543e-05	9.11645e-05	9.13608e-05		0.0912418	0.000101088
54947	2587	27127	Minnesota	Redwood County	-331.644	-747.175	-295.749	-666.145	90.6644	204.262	80.8515	182.11		9.14474e-05	9.10286e-05	9.13784e-05	9.09898e-05	9.1496e-05	9.10773e-05	9.14271e-05	9.10384e-05		0.0912354	0.0002194
54718	2358	47079	Tennessee	Henry County	-330.589	-747.736	-294.83	-666.759	90.3769	204.417	80.601	182.279		9.11567e-05	9.10969e-05	9.10946e-05	9.10736e-05	9.12058e-05	9.11463e-05	9.11437e-05	9.1123e-05		0.0911301	4.22496e-05
52788	428	29069	Missouri	Dunklin County	-328.712	-749.785	-293.212	-668.714	89.8636	204.977	80.1585	182.814		9.0639e-05	9.13466e-05	9.05946e-05	9.13407e-05	9.06878e-05	9.1396e-05	9.06434e-05	9.13901e-05		0.0910048	0.000389927
52675	315	37027	North Carolina	Caldwell County	-329.802	-747.302	-294.204	-666.478	90.1616	204.298	80.43	182.203		9.09395e-05	9.10441e-05	9.09012e-05	9.10353e-05	9.09886e-05	9.10935e-05	9.09504e-05	9.10848e-05		0.0910047	7.067e-05
54789	2429	29015	Missouri	Benton County	-329.983	-746.24	-294.251	-665.504	90.2107	204.007	80.4424	181.936		9.09894e-05	9.09147e-05	9.09157e-05	9.09022e-05	9.10382e-05	9.09636e-05	9.09644e-05	9.09512e-05		0.0909549	4.5088e-05
54948	2588	36037	New York	Genesee County	-330.014	-745.091	-294.422	-664.552	90.2198	203.694	80.4894	181.676		9.09981e-05	9.07747e-05	9.09684e-05	9.07722e-05	9.10473e-05	9.08239e-05	9.10175e-05	9.08214e-05		0.0909029	0.000115732
52955	595	29215	Missouri	Texas County	-329.091	-745.675	-293.525	-665.018	89.967	203.853	80.244	181.803		9.07434e-05	9.08459e-05	9.06914e-05	9.08359e-05	9.07922e-05	9.08949e-05	9.07401e-05	9.08849e-05		0.0908036	7.38361e-05
53156	796	51650	Virginia	Hampton city	-328.876	-743.499	-293.489	-663.161	89.9088	203.259	80.2345	181.296		9.06843e-05	9.05808e-05	9.06802e-05	9.05822e-05	9.07335e-05	9.06302e-05	9.07294e-05	9.06316e-05		0.0906565	5.99063e-05
53365	1005	31107	Nebraska	Knox County	-329.223	-741.664	-293.575	-661.221	90.0028	202.756	80.2573	180.764		9.078e-05	9.03573e-05	9.07069e-05	9.03172e-05	9.08283e-05	9.04055e-05	9.07551e-05	9.03654e-05		0.0905645	0.000220925
54402	2042	27095	Minnesota	Mille Lacs County	-328.537	-741.017	-293.074	-660.759	89.8154	202.579	80.1204	180.638		9.05909e-05	9.02784e-05	9.0552e-05	9.02542e-05	9.06392e-05	9.03267e-05	9.06003e-05	9.03025e-05		0.090443	0.000166035
54790	2430	18083	Indiana	Knox County	-327.072	-740.5	-291.754	-660.359	89.4153	202.439	79.76	180.53		9.01868e-05	9.02154e-05	9.01442e-05	9.01995e-05	9.02354e-05	9.02642e-05	9.01928e-05	9.02484e-05		0.0902108	3.84516e-05
54949	2589	39171	Ohio	Williams County	-327.136	-739.357	-291.793	-659.393	89.4327	202.126	79.7707	180.266		9.02043e-05	9.00761e-05	9.01563e-05	9.00676e-05	9.0253e-05	9.01249e-05	9.02049e-05	9.01163e-05		0.0901504	6.61428e-05
54133	1773	12119	Florida	Sumter County	-327.395	-739.065	-291.842	-658.895	89.5039	202.047	79.7845	180.13		9.02758e-05	9.00406e-05	9.01715e-05	8.99995e-05	9.03249e-05	9.00897e-05	9.02204e-05	9.00486e-05		0.0901464	0.000119683
54719	2359	47019	Tennessee	Carter County	-326.545	-739.476	-291.276	-659.484	89.2713	202.159	79.6294	180.291		9.00414e-05	9.00907e-05	8.99965e-05	9.008e-05	9.00901e-05	9.01396e-05	9.00451e-05	9.01288e-05		0.0900765	4.74059e-05
55306	2946	16049	Idaho	Idaho County	-326.581	-737.338	-291.312	-657.607	89.2807	201.573	79.6387	179.776		9.00515e-05	8.98302e-05	9.00076e-05	8.98236e-05	9.00996e-05	8.98783e-05	9.00556e-05	8.98717e-05		0.0899523	0.000112558
53530	1170	6051	California	Mono County	-325.285	-735.166	-290.593	-656.027	88.9247	200.976	79.4408	179.341		8.96941e-05	8.95655e-05	8.97855e-05	8.96078e-05	8.97403e-05	8.96119e-05	8.98318e-05	8.96542e-05		0.0896864	9.36006e-05
53366	1006	42123	Pennsylvania	Warren County	-325.277	-733.854	-290.092	-654.332	88.9246	200.622	79.3056	178.882		8.96918e-05	8.94058e-05	8.96306e-05	8.93762e-05	8.97402e-05	8.94543e-05	8.9679e-05	8.94247e-05		0.0895503	0.000148946
54022	1662	22005	Louisiana	Ascension Parish	-323.29	-733.048	-288.729	-654.094	88.3815	200.402	78.9333	178.818		8.91439e-05	8.93075e-05	8.92096e-05	8.93438e-05	8.91922e-05	8.93562e-05	8.9258e-05	8.93924e-05		0.0892754	8.84683e-05
54486	2126	17049	Illinois	Effingham County	-323.486	-731.323	-288.642	-652.352	88.4349	199.93	78.9093	178.341		8.9198e-05	8.90974e-05	8.91827e-05	8.91058e-05	8.9246e-05	8.91455e-05	8.92307e-05	8.9154e-05		0.08917	5.4342e-05
54259	1899	19183	Iowa	Washington County	-323.623	-730.002	-288.675	-650.998	88.4722	199.568	78.9181	177.97		8.92359e-05	8.89364e-05	8.9193e-05	8.89208e-05	8.92837e-05	8.89842e-05	8.92407e-05	8.89687e-05		0.0890954	0.000155845
54547	2187	17157	Illinois	Randolph County	-321.779	-727.099	-287.046	-648.457	87.9682	198.775	78.4729	177.276		8.87273e-05	8.85828e-05	8.86896e-05	8.85737e-05	8.87751e-05	8.86306e-05	8.87373e-05	8.86216e-05		0.0886673	7.55577e-05
53252	892	13045	Georgia	Carroll County	-321.331	-727.442	-286.754	-648.798	87.846	198.869	78.3933	177.37		8.86037e-05	8.86245e-05	8.85993e-05	8.86203e-05	8.86518e-05	8.86728e-05	8.86473e-05	8.86686e-05		0.088636	2.81907e-05
54487	2127	19079	Iowa	Hamilton County	-320.909	-723.695	-286.225	-645.33	87.73	197.843	78.2482	176.42		8.84875e-05	8.81681e-05	8.8436e-05	8.81467e-05	8.85347e-05	8.82153e-05	8.84832e-05	8.81939e-05		0.0883332	0.000165979
52789	429	48481	Texas	Wharton County	-320.22	-724.644	-285.677	-646.274	87.5422	198.104	78.0986	176.679		8.82975e-05	8.82837e-05	8.82665e-05	8.82756e-05	8.83452e-05	8.83315e-05	8.83141e-05	8.83235e-05		0.0883047	2.82823e-05
54950	2590	29195	Missouri	Saline County	-319.916	-724.776	-285.364	-646.326	87.4587	198.139	78.0128	176.693		8.82136e-05	8.82998e-05	8.81699e-05	8.82828e-05	8.82608e-05	8.83472e-05	8.82171e-05	8.83302e-05		0.0882652	6.15804e-05
53053	693	18011	Indiana	Boone County	-319.863	-723.248	-285.497	-645.249	87.4444	197.722	78.0494	176.399		8.81989e-05	8.81136e-05	8.82109e-05	8.81356e-05	8.82465e-05	8.81612e-05	8.82585e-05	8.81833e-05		0.0881886	5.07773e-05
53157	797	47045	Tennessee	Dyer County	-318.868	-722.173	-284.474	-644.093	87.1726	197.428	77.7699	176.083		8.79247e-05	8.79826e-05	8.7895e-05	8.79777e-05	8.79721e-05	8.80303e-05	8.79424e-05	8.80254e-05		0.0879688	4.68403e-05
53367	1007	36051	New York	Livingston County	-319.3	-720.601	-284.885	-642.693	87.2907	196.999	77.8822	175.7		8.80438e-05	8.77911e-05	8.80218e-05	8.77865e-05	8.80914e-05	8.78387e-05	8.80694e-05	8.78341e-05		0.0879346	0.000133159
53750	1390	29083	Missouri	Henry County	-318.665	-720.947	-284.225	-642.949	87.1166	197.092	77.7015	175.769		8.78686e-05	8.78332e-05	8.78179e-05	8.78215e-05	8.79156e-05	8.78805e-05	8.7865e-05	8.78687e-05		0.0878589	3.30566e-05
53849	1489	37127	North Carolina	Nash County	-317.345	-720.109	-283.099	-642.273	86.7564	196.865	77.394	175.586		8.75047e-05	8.77312e-05	8.74699e-05	8.7729e-05	8.75521e-05	8.7779e-05	8.75173e-05	8.77768e-05		0.0876325	0.000133011
54403	2043	56045	Wyoming	Weston County	-318.2	-717.629	-283.839	-639.846	86.9885	196.183	77.5952	174.919		8.77404e-05	8.7429e-05	8.76988e-05	8.73976e-05	8.77864e-05	8.7475e-05	8.77448e-05	8.74436e-05		0.0875895	0.000166723
54951	2591	41037	Oregon	Lake County	-318.458	-717.14	-283.949	-639.267	87.0598	196.051	77.6256	174.762		8.78117e-05	8.73695e-05	8.77326e-05	8.73185e-05	8.78583e-05	8.7416e-05	8.77792e-05	8.7365e-05		0.0875814	0.000232971
55307	2947	31045	Nebraska	Dawes County	-317.39	-719.039	-283.086	-641.1	86.7672	196.569	77.3895	175.262		8.7517e-05	8.76008e-05	8.74662e-05	8.75689e-05	8.75631e-05	8.76471e-05	8.75122e-05	8.76151e-05		0.0875613	6.01155e-05
52790	430	51089	Virginia	Henry County	-317.777	-717.965	-283.379	-640.129	86.8744	196.279	77.4707	175		8.76238e-05	8.747e-05	8.75566e-05	8.74363e-05	8.76713e-05	8.75175e-05	8.7604e-05	8.74838e-05		0.0875454	8.25629e-05
53368	1008	4001	Arizona	Apache County	-314.916	-723.927	-280.99	-645.569	86.0117	197.723	76.7457	176.322		8.68349e-05	8.81963e-05	8.68184e-05	8.81793e-05	8.68006e-05	8.81617e-05	8.67842e-05	8.81447e-05		0.08749	0.000727767
52640	280	54061	West Virginia	Monongalia County	-316.554	-718.892	-282.653	-641.538	86.5399	196.532	77.2721	175.385		8.72864e-05	8.75829e-05	8.73322e-05	8.76287e-05	8.73336e-05	8.76304e-05	8.73794e-05	8.76762e-05		0.0874812	0.000162415
54952	2592	13313	Georgia	Whitfield County	-317.246	-717.54	-283.161	-640.047	86.7293	196.162	77.4111	174.977		8.74774e-05	8.74182e-05	8.74892e-05	8.74251e-05	8.75248e-05	8.74658e-05	8.75366e-05	8.74727e-05		0.0874762	4.18878e-05
53253	893	27129	Minnesota	Renville County	-317.293	-714.926	-282.941	-637.375	86.7414	195.446	77.3502	174.245		8.74905e-05	8.70997e-05	8.74212e-05	8.706e-05	8.7537e-05	8.71463e-05	8.74677e-05	8.71066e-05		0.0872911	0.000204721
53254	894	45035	South Carolina	Dorchester County	-316.166	-716.217	-282.233	-638.949	86.4342	195.801	77.1575	174.677		8.71797e-05	8.7257e-05	8.72026e-05	8.7275e-05	8.7227e-05	8.73045e-05	8.72499e-05	8.73226e-05		0.0872523	4.86813e-05
54488	2128	36105	New York	Sullivan County	-316.135	-716.566	-282.034	-639.032	86.4256	195.896	77.1029	174.7		8.71711e-05	8.72995e-05	8.71409e-05	8.72864e-05	8.72183e-05	8.7347e-05	8.71881e-05	8.73339e-05		0.0872481	7.85519e-05
54953	2593	38061	North Dakota	Mountrail County	-315.739	-715.53	-281.68	-638.15	86.316	195.61	77.0051	174.456		8.70618e-05	8.71733e-05	8.70315e-05	8.71659e-05	8.71077e-05	8.72195e-05	8.70775e-05	8.72121e-05		0.0871312	7.12126e-05
54791	2431	21157	Kentucky	Marshall County	-315.108	-713.579	-281.087	-636.454	86.1445	195.079	76.8439	173.995		8.68878e-05	8.69356e-05	8.68484e-05	8.69343e-05	8.69346e-05	8.69826e-05	8.68952e-05	8.69813e-05		0.086925	4.61885e-05
54023	1663	27135	Minnesota	Roseau County	-315.151	-709.914	-281.139	-633.06	86.1558	194.076	76.8576	173.065		8.68998e-05	8.64891e-05	8.68645e-05	8.64707e-05	8.6946e-05	8.65353e-05	8.69107e-05	8.65169e-05		0.0867041	0.000216948
54954	2594	13151	Georgia	Henry County	-313.972	-711.366	-280.417	-634.786	85.8342	194.474	76.6608	173.539		8.65746e-05	8.6666e-05	8.66413e-05	8.67064e-05	8.66215e-05	8.67131e-05	8.66882e-05	8.67536e-05		0.0866706	5.70675e-05
54260	1900	40087	Oklahoma	McClain County	-314.087	-710.246	-280.259	-633.478	85.8652	194.167	76.6175	173.181		8.66062e-05	8.65295e-05	8.65927e-05	8.65278e-05	8.66528e-05	8.65762e-05	8.66392e-05	8.65745e-05		0.0865874	4.55587e-05
54792	2432	47131	Tennessee	Obion County	-313.751	-710.108	-279.853	-633.267	85.7735	194.13	76.5064	173.123		8.65136e-05	8.65128e-05	8.6467e-05	8.6499e-05	8.65602e-05	8.65597e-05	8.65136e-05	8.65459e-05		0.0865215	3.21284e-05
52791	431	42025	Pennsylvania	Carbon County	-313.571	-709.948	-279.648	-633.103	85.7247	194.087	76.4506	173.079		8.64642e-05	8.64933e-05	8.64037e-05	8.64766e-05	8.6511e-05	8.65404e-05	8.64505e-05	8.65236e-05		0.0864829	4.40363e-05
54955	2595	29207	Missouri	Stoddard County	-313.548	-709.653	-279.669	-632.877	85.7182	194.006	76.4563	173.016		8.64578e-05	8.64573e-05	8.64104e-05	8.64456e-05	8.65044e-05	8.6504e-05	8.64569e-05	8.64924e-05		0.0864661	3.24078e-05
52471	111	17027	Illinois	Clinton County	-313.597	-709	-279.862	-632.494	85.7314	193.827	76.5088	172.912		8.64712e-05	8.63777e-05	8.64697e-05	8.63934e-05	8.65178e-05	8.64244e-05	8.65163e-05	8.64401e-05		0.0864513	5.20922e-05
52956	596	47107	Tennessee	McMinn County	-312.854	-710.541	-279.077	-633.697	85.5286	194.249	76.2946	173.241		8.62664e-05	8.65655e-05	8.62274e-05	8.65577e-05	8.63131e-05	8.66126e-05	8.62741e-05	8.66047e-05		0.0864277	0.000170811
53369	1009	21125	Kentucky	Laurel County	-312.577	-710.255	-278.944	-633.609	85.4528	194.17	76.2581	173.217		8.61901e-05	8.65306e-05	8.61863e-05	8.65457e-05	8.62366e-05	8.65775e-05	8.62328e-05	8.65927e-05		0.0863865	0.000188939
54261	1901	39011	Ohio	Auglaize County	-313.188	-708.432	-279.449	-632.034	85.6198	193.672	76.3961	172.786		8.63585e-05	8.63085e-05	8.63423e-05	8.63305e-05	8.64051e-05	8.63553e-05	8.63889e-05	8.63773e-05		0.0863583	3.16235e-05
54793	2433	45085	South Carolina	Sumter County	-312.732	-708.419	-279.01	-631.76	85.4953	193.669	76.2762	172.712		8.62327e-05	8.6307e-05	8.62065e-05	8.6293e-05	8.62794e-05	8.6354e-05	8.62533e-05	8.634e-05		0.0862833	5.10576e-05
54956	2596	21009	Kentucky	Barren County	-312.399	-707.855	-278.748	-631.438	85.4042	193.514	76.2046	172.624		8.6141e-05	8.62383e-05	8.61258e-05	8.62492e-05	8.61875e-05	8.62851e-05	8.61723e-05	8.6296e-05		0.0862119	6.44911e-05
53054	694	37171	North Carolina	Surry County	-312.172	-706.665	-278.48	-630.246	85.3421	193.189	76.1314	172.298		8.60783e-05	8.60933e-05	8.60429e-05	8.60863e-05	8.61249e-05	8.61401e-05	8.60895e-05	8.61331e-05		0.0860985	3.24508e-05
52676	316	5023	Arkansas	Cleburne County	-311.42	-705.272	-277.771	-628.953	85.1364	192.808	75.9374	171.944		8.5871e-05	8.59236e-05	8.58239e-05	8.59097e-05	8.59173e-05	8.597e-05	8.58701e-05	8.59562e-05		0.0859052	4.82757e-05
53666	1306	37031	North Carolina	Carteret County	-311.551	-704.143	-277.878	-627.869	85.1725	192.5	75.9668	171.648		8.59071e-05	8.57861e-05	8.58569e-05	8.57616e-05	8.59537e-05	8.58328e-05	8.59034e-05	8.58083e-05		0.0858512	6.63684e-05
55189	2829	48273	Texas	Kleberg County	-310.285	-706.137	-276.957	-629.842	84.826	193.045	75.7147	172.187		8.55579e-05	8.6029e-05	8.55722e-05	8.60311e-05	8.56041e-05	8.60756e-05	8.56183e-05	8.60777e-05		0.0858207	0.000249946
52394	34	47073	Tennessee	Hawkins County	-310.98	-703.88	-277.4	-627.758	85.0161	192.428	75.8361	171.618		8.57495e-05	8.5754e-05	8.57093e-05	8.57465e-05	8.57959e-05	8.58006e-05	8.57556e-05	8.57931e-05		0.0857631	3.13296e-05
52792	432	37161	North Carolina	Rutherford County	-310.589	-704.349	-276.996	-628.057	84.9092	192.556	75.7255	171.699		8.56417e-05	8.58112e-05	8.55843e-05	8.57874e-05	8.5688e-05	8.58578e-05	8.56305e-05	8.5834e-05		0.0857294	0.000105353
52957	597	12055	Florida	Highlands County	-310.651	-703.181	-277.027	-627.111	84.9264	192.237	75.7342	171.441		8.56588e-05	8.56689e-05	8.55939e-05	8.56581e-05	8.57053e-05	8.57156e-05	8.56404e-05	8.57049e-05		0.0856682	4.04678e-05
53055	695	23001	Maine	Androscoggin County	-310.396	-702.354	-276.929	-626.564	84.8566	192.011	75.7074	171.291		8.55886e-05	8.55681e-05	8.55638e-05	8.55833e-05	8.56349e-05	8.56146e-05	8.56101e-05	8.56299e-05		0.0855992	2.71478e-05
53158	798	19123	Iowa	Mahaska County	-310.711	-701.685	-277.214	-625.816	84.9423	191.827	75.7847	171.085		8.56756e-05	8.54866e-05	8.56517e-05	8.54812e-05	8.57214e-05	8.55325e-05	8.56975e-05	8.55271e-05		0.0855967	9.95505e-05
53370	1010	51085	Virginia	Hanover County	-310.442	-701.153	-276.993	-625.374	84.8692	191.682	75.7248	170.966		8.56012e-05	8.54217e-05	8.55834e-05	8.54209e-05	8.56476e-05	8.54682e-05	8.56298e-05	8.54673e-05		0.08553	9.49455e-05
53850	1490	42127	Pennsylvania	Wayne County	-309.439	-701.337	-275.946	-625.35	84.5951	191.733	75.4386	170.959		8.53248e-05	8.54442e-05	8.526e-05	8.54176e-05	8.5371e-05	8.54907e-05	8.53062e-05	8.5464e-05		0.0853848	8.25026e-05
54404	2044	39123	Ohio	Ottawa County	-309.964	-699.689	-276.447	-623.958	84.7383	191.282	75.5754	170.578		8.54694e-05	8.52434e-05	8.54148e-05	8.52274e-05	8.55155e-05	8.52895e-05	8.54608e-05	8.52735e-05		0.0853618	0.000115222
54794	2434	50027	Vermont	Windsor County	-309.709	-700.29	-276.21	-624.399	84.6689	191.446	75.5108	170.699		8.53992e-05	8.53166e-05	8.53416e-05	8.52876e-05	8.54455e-05	8.5363e-05	8.53878e-05	8.5334e-05		0.0853594	5.03623e-05
55190	2830	55093	Wisconsin	Pierce County	-309.527	-699.768	-276.276	-624.142	84.6185	191.302	75.5283	170.628		8.5349e-05	8.5253e-05	8.5362e-05	8.52526e-05	8.53946e-05	8.52987e-05	8.54076e-05	8.52983e-05		0.085327	6.02664e-05
54176	1816	29201	Missouri	Scott County	-309.207	-699.729	-275.86	-624.066	84.5315	191.293	75.415	170.608		8.52609e-05	8.52482e-05	8.52335e-05	8.52422e-05	8.53068e-05	8.52944e-05	8.52794e-05	8.52883e-05		0.0852692	2.68131e-05
52677	317	28109	Mississippi	Pearl River County	-308.471	-699.836	-275.223	-624.117	84.3303	191.322	75.2411	170.622		8.50577e-05	8.52613e-05	8.50367e-05	8.52491e-05	8.51038e-05	8.53077e-05	8.50828e-05	8.52956e-05		0.0851743	0.000114364
54262	1902	48463	Texas	Uvalde County	-308.457	-698.286	-275.225	-622.766	84.3264	190.898	75.2413	170.252		8.5054e-05	8.50725e-05	8.50372e-05	8.50645e-05	8.50999e-05	8.51186e-05	8.50831e-05	8.51106e-05		0.0850801	2.83586e-05
54337	1977	1069	Alabama	Houston County	-307.963	-696.093	-274.821	-620.85	84.1914	190.299	75.1311	169.729		8.49176e-05	8.48053e-05	8.49124e-05	8.48029e-05	8.49636e-05	8.48515e-05	8.49585e-05	8.4849e-05		0.0848826	6.42133e-05
53371	1011	26009	Michigan	Antrim County	-307.93	-695.604	-274.638	-620.348	84.1822	190.165	75.0806	169.591		8.49087e-05	8.47458e-05	8.48557e-05	8.47343e-05	8.49544e-05	8.47915e-05	8.49013e-05	8.47801e-05		0.084834	8.23827e-05
54795	2435	29131	Missouri	Miller County	-307.83	-695.764	-274.592	-620.447	84.1548	190.208	75.0681	169.618		8.48812e-05	8.47652e-05	8.48416e-05	8.47478e-05	8.49267e-05	8.48109e-05	8.48871e-05	8.47935e-05		0.0848318	6.32362e-05
53851	1491	37087	North Carolina	Haywood County	-307.679	-695.837	-274.406	-620.454	84.1138	190.229	75.0175	169.621		8.48395e-05	8.47741e-05	8.47841e-05	8.47487e-05	8.48853e-05	8.48201e-05	8.48299e-05	8.47948e-05		0.0848096	4.3077e-05
54134	1774	8105	Colorado	Rio Grande County	-307.389	-693.599	-274.126	-618.335	84.0328	189.613	74.9394	169.038		8.47595e-05	8.45015e-05	8.46976e-05	8.44593e-05	8.48035e-05	8.45456e-05	8.47417e-05	8.45034e-05		0.0846265	0.000137645
54957	2597	16057	Idaho	Latah County	-305.604	-696.113	-272.844	-621.081	83.5461	190.303	74.5902	169.791		8.42673e-05	8.48077e-05	8.43016e-05	8.48344e-05	8.43124e-05	8.48534e-05	8.43467e-05	8.48801e-05		0.0845755	0.000288467
54405	2045	26051	Michigan	Gladwin County	-305.901	-692.229	-272.844	-617.433	83.6275	189.242	74.5902	168.794		8.43492e-05	8.43346e-05	8.43015e-05	8.43361e-05	8.43945e-05	8.43801e-05	8.43468e-05	8.43816e-05		0.0843531	3.07377e-05
55191	2831	18113	Indiana	Noble County	-305.647	-691.308	-272.761	-616.668	83.5582	188.99	74.5676	168.585		8.42792e-05	8.42223e-05	8.42757e-05	8.42317e-05	8.43246e-05	8.42679e-05	8.43211e-05	8.42773e-05		0.084275	3.64859e-05
52678	318	33017	New Hampshire	Strafford County	-305.059	-690.977	-272.204	-616.356	83.3975	188.9	74.4155	168.5		8.41169e-05	8.4182e-05	8.41037e-05	8.4189e-05	8.41625e-05	8.42277e-05	8.41492e-05	8.42348e-05		0.0841707	4.74104e-05
53944	1584	24045	Maryland	Wicomico County	-303.956	-691.934	-271.189	-617.124	83.0959	189.162	74.1382	168.71		8.38127e-05	8.42986e-05	8.37902e-05	8.42939e-05	8.38581e-05	8.43445e-05	8.38356e-05	8.43398e-05		0.0840717	0.000265884
54958	2598	47099	Tennessee	Lawrence County	-304.599	-690.17	-271.698	-615.479	83.2718	188.68	74.2773	168.261		8.39902e-05	8.40837e-05	8.39475e-05	8.40693e-05	8.40356e-05	8.41294e-05	8.39929e-05	8.4115e-05		0.0840455	6.48136e-05
52679	319	55099	Wisconsin	Price County	-305.644	-688.006	-272.536	-613.313	83.557	188.087	74.5059	167.668		8.42783e-05	8.38201e-05	8.42063e-05	8.37735e-05	8.43234e-05	8.38651e-05	8.42514e-05	8.38185e-05		0.0840421	0.00024156
54096	1736	37133	North Carolina	Onslow County	-303.487	-691.311	-271.214	-617.103	82.9678	188.992	74.1449	168.705		8.36834e-05	8.42227e-05	8.37978e-05	8.42911e-05	8.37288e-05	8.42686e-05	8.38433e-05	8.4337e-05		0.0840216	0.000281706
53586	1226	46129	South Dakota	Walworth County	-305.289	-688.372	-272.228	-613.763	83.4596	188.186	74.4212	167.79		8.41804e-05	8.38646e-05	8.41111e-05	8.38348e-05	8.42251e-05	8.39093e-05	8.41557e-05	8.38794e-05		0.0840201	0.000162546
53751	1391	8051	Colorado	Gunnison County	-302.847	-690.172	-270.489	-615.843	82.7909	188.676	73.9449	168.356		8.35071e-05	8.40839e-05	8.35739e-05	8.4119e-05	8.35503e-05	8.41276e-05	8.36171e-05	8.41626e-05		0.0838427	0.000302223
52602	242	38077	North Dakota	Richland County	-303.688	-688.455	-271.061	-614.284	83.0218	188.209	74.1024	167.932		8.37389e-05	8.38747e-05	8.37507e-05	8.39061e-05	8.37833e-05	8.39194e-05	8.37952e-05	8.39508e-05		0.0838399	8.24464e-05
54024	1664	48477	Texas	Washington County	-303.969	-687.859	-271.088	-613.314	83.0995	188.048	74.1104	167.668		8.38165e-05	8.38021e-05	8.3759e-05	8.37735e-05	8.38617e-05	8.38475e-05	8.38042e-05	8.38189e-05		0.0838104	3.42699e-05
54406	2046	55053	Wisconsin	Jackson County	-304.375	-685.773	-271.487	-611.419	83.2099	187.477	74.2191	167.15		8.39282e-05	8.3548e-05	8.38822e-05	8.35146e-05	8.39732e-05	8.35929e-05	8.39271e-05	8.35595e-05		0.0837407	0.000202447
54959	2599	46033	South Dakota	Custer County	-303.829	-685.82	-271.027	-611.742	83.06	187.488	74.0928	167.237		8.37778e-05	8.35538e-05	8.37402e-05	8.35589e-05	8.38218e-05	8.35979e-05	8.37843e-05	8.3603e-05		0.0836797	0.000111767
53255	895	18043	Indiana	Floyd County	-303.285	-686.612	-270.624	-612.437	82.9123	187.707	73.9834	167.429		8.36277e-05	8.36502e-05	8.36155e-05	8.36538e-05	8.36728e-05	8.36956e-05	8.36606e-05	8.36991e-05		0.0836594	2.95684e-05
54263	1903	26127	Michigan	Oceana County	-303.583	-685.89	-270.812	-611.661	82.9936	187.509	74.0349	167.216		8.37099e-05	8.35622e-05	8.36738e-05	8.35477e-05	8.37549e-05	8.36073e-05	8.37188e-05	8.35928e-05		0.0836459	7.83709e-05
52680	320	19029	Iowa	Cass County	-303.714	-684.85	-270.867	-610.666	83.029	187.224	74.0494	166.943		8.3746e-05	8.34356e-05	8.36906e-05	8.34118e-05	8.37906e-05	8.34802e-05	8.37352e-05	8.34564e-05		0.0835933	0.000160892
53752	1392	29141	Missouri	Morgan County	-302.655	-685.021	-269.927	-610.887	82.7398	187.271	73.7926	167.004		8.3454e-05	8.34563e-05	8.34001e-05	8.3442e-05	8.34987e-05	8.35013e-05	8.34449e-05	8.3487e-05		0.0834605	3.40418e-05
54407	2047	27159	Minnesota	Wadena County	-303.41	-683.482	-270.508	-609.249	82.946	186.85	73.9512	166.556		8.36623e-05	8.32689e-05	8.35797e-05	8.32183e-05	8.37068e-05	8.33134e-05	8.36242e-05	8.32628e-05		0.0834545	0.00020638
53852	1492	1033	Alabama	Colbert County	-302.525	-683.49	-269.839	-609.463	82.7047	186.854	73.769	166.616		8.34182e-05	8.32698e-05	8.3373e-05	8.32475e-05	8.34633e-05	8.33151e-05	8.34181e-05	8.32927e-05		0.0833497	7.93584e-05
54025	1665	41025	Oregon	Harney County	-302.931	-682.735	-270.116	-608.614	82.8146	186.645	73.8438	166.382		8.353e-05	8.31779e-05	8.34586e-05	8.31316e-05	8.35742e-05	8.3222e-05	8.35027e-05	8.31756e-05		0.0833466	0.000185852
54960	2600	16059	Idaho	Lemhi County	-302.564	-682.735	-269.823	-608.81	82.7142	186.644	73.7636	166.435		8.3429e-05	8.31779e-05	8.33682e-05	8.31584e-05	8.34729e-05	8.32218e-05	8.3412e-05	8.32023e-05		0.0833053	0.000127685
54548	2188	19171	Iowa	Tama County	-302.368	-682.015	-269.702	-608.191	82.6612	186.449	73.731	166.267		8.33749e-05	8.30902e-05	8.33306e-05	8.30738e-05	8.34194e-05	8.31348e-05	8.33751e-05	8.31183e-05		0.0832396	0.000147737
54026	1666	36077	New York	Otsego County	-302.167	-681.913	-269.53	-608.091	82.6069	186.422	73.6844	166.241		8.33195e-05	8.30777e-05	8.32774e-05	8.30601e-05	8.33646e-05	8.31229e-05	8.33225e-05	8.31053e-05		0.0832063	0.000126213
53372	1012	51019	Virginia	Bedford County	-301.835	-682.107	-269.306	-608.406	82.5161	186.475	73.6232	166.327		8.32279e-05	8.31013e-05	8.32082e-05	8.31032e-05	8.32729e-05	8.31465e-05	8.32533e-05	8.31484e-05		0.0831827	6.681e-05
54961	2601	26071	Michigan	Iron County	-301.995	-680.919	-269.222	-606.989	82.5596	186.15	73.5999	165.939		8.32722e-05	8.29567e-05	8.31823e-05	8.29096e-05	8.33168e-05	8.30013e-05	8.32269e-05	8.29543e-05		0.0831025	0.000163556
54668	2308	55049	Wisconsin	Iowa County	-301.907	-680.097	-269.342	-606.433	82.5353	185.925	73.6327	165.787		8.32477e-05	8.28565e-05	8.32195e-05	8.28337e-05	8.32923e-05	8.29011e-05	8.32641e-05	8.28783e-05		0.0830616	0.000209463
52472	112	13015	Georgia	Bartow County	-301.341	-680.927	-268.943	-607.365	82.3813	186.153	73.5241	166.043		8.30918e-05	8.29576e-05	8.30961e-05	8.2961e-05	8.31369e-05	8.30028e-05	8.31412e-05	8.30061e-05		0.0830492	7.59302e-05
55426	3066	35007	New Mexico	Colfax County	-300.864	-682.249	-268.355	-608.432	82.2493	186.512	73.3623	166.332		8.29601e-05	8.31187e-05	8.29146e-05	8.31067e-05	8.30037e-05	8.31626e-05	8.29582e-05	8.31505e-05		0.0830469	9.82771e-05
53587	1227	37135	North Carolina	Orange County	-300.927	-681.024	-268.688	-607.683	82.2681	186.18	73.4545	166.13		8.29777e-05	8.29694e-05	8.30175e-05	8.30044e-05	8.30227e-05	8.30146e-05	8.30625e-05	8.30496e-05		0.0830148	3.18326e-05
52395	35	22099	Louisiana	St. Martin Parish	-300.922	-680.124	-268.568	-606.642	82.2665	185.934	73.4216	165.845		8.29761e-05	8.28598e-05	8.29804e-05	8.28622e-05	8.3021e-05	8.29049e-05	8.30253e-05	8.29073e-05		0.0829421	6.70937e-05
52793	433	51179	Virginia	Stafford County	-300.836	-677.807	-268.725	-604.919	82.243	185.3	73.4644	165.374		8.29524e-05	8.25775e-05	8.30288e-05	8.26269e-05	8.29973e-05	8.26224e-05	8.30737e-05	8.26718e-05		0.0828189	0.000211805
53667	1307	31177	Nebraska	Washington County	-300.734	-678.536	-268.318	-605.134	82.2144	185.498	73.3525	165.431		8.29245e-05	8.26663e-05	8.29031e-05	8.26563e-05	8.29685e-05	8.27105e-05	8.29472e-05	8.27004e-05		0.0828096	0.00013728
54796	2436	31185	Nebraska	York County	-300.458	-678.385	-268.04	-604.973	82.1389	185.456	73.2767	165.387		8.28482e-05	8.26479e-05	8.28173e-05	8.26342e-05	8.28923e-05	8.26921e-05	8.28614e-05	8.26784e-05		0.082759	0.000105912
54962	2602	5015	Arkansas	Carroll County	-299.903	-679.133	-267.57	-605.741	81.9877	185.662	73.1485	165.598		8.26953e-05	8.27391e-05	8.26721e-05	8.27391e-05	8.27397e-05	8.27837e-05	8.27165e-05	8.27837e-05		0.0827336	3.90334e-05
52473	113	27045	Minnesota	Fillmore County	-300.29	-676.637	-267.812	-603.292	82.0932	184.979	73.2144	164.928		8.28019e-05	8.2435e-05	8.27468e-05	8.24046e-05	8.28462e-05	8.24793e-05	8.2791e-05	8.24488e-05		0.0826192	0.000192471
53056	696	28087	Mississippi	Lowndes County	-298.769	-675.288	-266.606	-602.282	81.6779	184.612	72.8851	164.653		8.23825e-05	8.22707e-05	8.2374e-05	8.22666e-05	8.24271e-05	8.23154e-05	8.24186e-05	8.23113e-05		0.0823458	6.33312e-05
53159	799	48281	Texas	Lampasas County	-298.64	-674.661	-266.458	-601.687	81.6424	184.44	72.8446	164.49		8.23469e-05	8.21942e-05	8.23285e-05	8.21853e-05	8.23912e-05	8.22387e-05	8.23729e-05	8.22298e-05		0.0822859	8.2875e-05
53531	1171	48337	Texas	Montague County	-298.641	-674.447	-266.337	-601.33	81.6428	184.381	72.8113	164.392		8.23473e-05	8.21681e-05	8.22909e-05	8.21366e-05	8.23916e-05	8.22125e-05	8.23352e-05	8.2181e-05		0.0822579	9.53737e-05
53853	1493	54049	West Virginia	Marion County	-298.151	-675.158	-265.994	-602.212	81.5091	184.576	72.7178	164.634		8.22123e-05	8.22547e-05	8.21851e-05	8.22571e-05	8.22567e-05	8.22994e-05	8.22295e-05	8.23018e-05		0.0822496	4.01747e-05
54027	1667	36021	New York	Columbia County	-298.124	-673.967	-265.879	-600.962	81.5018	184.25	72.6866	164.292		8.22048e-05	8.21097e-05	8.21497e-05	8.20863e-05	8.22493e-05	8.21544e-05	8.21942e-05	8.2131e-05		0.0821599	5.35757e-05
54963	2603	19133	Iowa	Monona County	-298.492	-672.648	-266.123	-599.642	81.6015	183.888	72.7523	163.93		8.23062e-05	8.19489e-05	8.22248e-05	8.19061e-05	8.23499e-05	8.19927e-05	8.22685e-05	8.19498e-05		0.0821184	0.000185461
53854	1494	29007	Missouri	Audrain County	-297.603	-672.812	-265.498	-599.947	81.3587	183.934	72.582	164.014		8.2061e-05	8.1969e-05	8.20319e-05	8.19478e-05	8.2105e-05	8.20131e-05	8.20759e-05	8.19919e-05		0.0820244	5.43338e-05
53668	1308	32015	Nevada	Lander County	-297.537	-672.819	-265.493	-600.062	81.3392	183.932	72.5793	164.042		8.20427e-05	8.19698e-05	8.20302e-05	8.19634e-05	8.20853e-05	8.20125e-05	8.20728e-05	8.2006e-05		0.0820228	4.40521e-05
54109	1749	19097	Iowa	Jackson County	-297.534	-671.204	-265.378	-598.537	81.3399	183.494	72.549	163.628		8.2042e-05	8.17731e-05	8.19946e-05	8.17551e-05	8.2086e-05	8.18171e-05	8.20386e-05	8.17991e-05		0.0819132	0.000139214
54964	2604	36053	New York	Madison County	-297.268	-670.641	-265.211	-598.053	81.2676	183.341	72.5037	163.497		8.19686e-05	8.17045e-05	8.19431e-05	8.1689e-05	8.2013e-05	8.17489e-05	8.19874e-05	8.17334e-05		0.0818485	0.000140939
52603	243	23017	Maine	Oxford County	-296.257	-672.452	-264.233	-599.782	80.9913	183.836	72.2365	163.969		8.169e-05	8.19251e-05	8.16411e-05	8.19251e-05	8.17342e-05	8.19697e-05	8.16852e-05	8.19696e-05		0.0818175	0.000142073
54489	2129	39009	Ohio	Athens County	-294.879	-673.828	-263.169	-601.152	80.6144	184.212	71.9454	164.344		8.13099e-05	8.20927e-05	8.13121e-05	8.21123e-05	8.13538e-05	8.21372e-05	8.1356e-05	8.21569e-05		0.0817289	0.000423987
54720	2360	29217	Missouri	Vernon County	-296.313	-670.332	-264.28	-597.734	81.0059	183.255	72.2488	163.409		8.17052e-05	8.16668e-05	8.16554e-05	8.16455e-05	8.17489e-05	8.17107e-05	8.16991e-05	8.16894e-05		0.0816901	3.36694e-05
52529	169	26129	Michigan	Ogemaw County	-296.481	-668.792	-264.38	-596.303	81.0522	182.835	72.2764	163.018		8.17517e-05	8.14792e-05	8.16864e-05	8.14499e-05	8.17957e-05	8.15232e-05	8.17303e-05	8.14939e-05		0.0816138	0.000140659
53160	800	42037	Pennsylvania	Columbia County	-295.657	-669.675	-263.737	-597.302	80.8273	183.077	72.101	163.291		8.15246e-05	8.15868e-05	8.14878e-05	8.15865e-05	8.15687e-05	8.16312e-05	8.1532e-05	8.16308e-05		0.0815685	5.10529e-05
54080	1720	27093	Minnesota	Meeker County	-296.303	-667.951	-264.332	-595.646	81.0031	182.604	72.263	162.837		8.17025e-05	8.13768e-05	8.16716e-05	8.13603e-05	8.1746e-05	8.14203e-05	8.17151e-05	8.14038e-05		0.0815495	0.000172364
53753	1393	19067	Iowa	Floyd County	-295.765	-667.098	-263.769	-594.823	80.8563	182.371	72.1092	162.612		8.15543e-05	8.12728e-05	8.14977e-05	8.12478e-05	8.15979e-05	8.13164e-05	8.15412e-05	8.12913e-05		0.0814149	0.000145818
54797	2437	55113	Wisconsin	Sawyer County	-295.813	-666.41	-263.78	-594.088	80.8695	182.183	72.1122	162.412		8.15676e-05	8.1189e-05	8.1501e-05	8.11474e-05	8.16112e-05	8.12326e-05	8.15446e-05	8.11909e-05		0.081373	0.000199308
54965	2605	27057	Minnesota	Hubbard County	-295.478	-666.026	-263.574	-593.949	80.7777	182.078	72.0556	162.373		8.14752e-05	8.11423e-05	8.14372e-05	8.11284e-05	8.15186e-05	8.11857e-05	8.14806e-05	8.11718e-05		0.0813175	0.000173753
54110	1750	22117	Louisiana	Washington Parish	-294.005	-666.4	-262.251	-594.191	80.3755	182.182	71.6946	162.441		8.10688e-05	8.11878e-05	8.10285e-05	8.11614e-05	8.11127e-05	8.1232e-05	8.10724e-05	8.12056e-05		0.0811337	7.36982e-05
54601	2241	47105	Tennessee	Loudon County	-293.675	-666.538	-261.938	-594.459	80.2853	182.219	71.6089	162.514		8.0978e-05	8.12046e-05	8.09318e-05	8.11981e-05	8.10217e-05	8.12486e-05	8.09755e-05	8.12422e-05		0.0811001	0.000135054
53057	697	28093	Mississippi	Marshall County	-294.273	-664.939	-262.497	-592.9	80.4488	181.782	71.7617	162.088		8.11428e-05	8.10098e-05	8.11045e-05	8.09852e-05	8.11867e-05	8.10537e-05	8.11483e-05	8.10291e-05		0.0810825	7.34312e-05
53588	1228	29169	Missouri	Pulaski County	-290.77	-670.668	-259.821	-598.676	79.4909	183.347	71.0299	163.666		8.01769e-05	8.17078e-05	8.02777e-05	8.17741e-05	8.022e-05	8.17518e-05	8.03208e-05	8.18182e-05		0.0810059	0.000810947
54408	2048	46079	South Dakota	Lake County	-293.327	-664.548	-261.738	-592.809	80.1893	181.673	71.5535	162.061		8.08819e-05	8.09622e-05	8.08699e-05	8.09727e-05	8.09248e-05	8.10053e-05	8.09128e-05	8.10158e-05		0.0809432	5.44324e-05
54721	2361	1071	Alabama	Jackson County	-293.279	-664.084	-261.59	-592.147	80.177	181.548	71.514	161.882		8.08686e-05	8.09056e-05	8.08245e-05	8.08824e-05	8.09124e-05	8.09496e-05	8.08682e-05	8.09264e-05		0.0808922	3.93976e-05
54966	2606	55119	Wisconsin	Taylor County	-293.383	-661.231	-261.735	-589.634	80.2049	180.767	71.553	161.194		8.08973e-05	8.0558e-05	8.0869e-05	8.05391e-05	8.09406e-05	8.06013e-05	8.09123e-05	8.05823e-05		0.0807375	0.000180823
54264	1904	28149	Mississippi	Warren County	-292.631	-662.013	-261.096	-590.386	79.9999	180.982	71.3788	161.401		8.069e-05	8.06534e-05	8.06716e-05	8.06418e-05	8.07337e-05	8.06972e-05	8.07153e-05	8.06857e-05		0.0806861	3.04686e-05
54722	2362	19023	Iowa	Butler County	-293.021	-660.362	-261.326	-588.824	80.1059	180.53	71.4411	160.973		8.07975e-05	8.04522e-05	8.07426e-05	8.04284e-05	8.08406e-05	8.04953e-05	8.07857e-05	8.04716e-05		0.0806267	0.000179188
53461	1101	36115	New York	Washington County	-292.665	-660.411	-261.068	-588.961	80.0092	180.544	71.3711	161.011		8.06993e-05	8.04581e-05	8.06629e-05	8.04471e-05	8.0743e-05	8.05019e-05	8.07066e-05	8.04909e-05		0.0805887	0.000125155
53462	1102	48223	Texas	Hopkins County	-291.194	-662.785	-259.771	-591.139	79.607	181.193	71.0164	161.606		8.02939e-05	8.07473e-05	8.02622e-05	8.07447e-05	8.03372e-05	8.0791e-05	8.03055e-05	8.07884e-05		0.0805338	0.000251604
53161	801	54019	West Virginia	Fayette County	-292.095	-660.536	-260.536	-589.077	79.8533	180.578	71.2256	161.043		8.05422e-05	8.04733e-05	8.04986e-05	8.0463e-05	8.05857e-05	8.0517e-05	8.05421e-05	8.05066e-05		0.0805161	4.00996e-05
52901	541	30097	Montana	Sweet Grass County	-292.234	-659.914	-260.639	-588.496	79.8899	180.404	71.2525	160.881		8.05807e-05	8.03975e-05	8.05306e-05	8.03837e-05	8.06226e-05	8.04395e-05	8.05725e-05	8.04256e-05		0.0804941	9.31118e-05
52530	170	30057	Montana	Madison County	-291.941	-660.109	-260.43	-588.774	79.8098	180.458	71.1955	160.957		8.04997e-05	8.04213e-05	8.04659e-05	8.04216e-05	8.05419e-05	8.04636e-05	8.05081e-05	8.04639e-05		0.0804732	4.17791e-05
52474	114	29049	Missouri	Clinton County	-291.459	-659.604	-259.976	-588.244	79.679	180.322	71.0721	160.814		8.03669e-05	8.03598e-05	8.03256e-05	8.03491e-05	8.04098e-05	8.04029e-05	8.03685e-05	8.03922e-05		0.0803719	2.84206e-05
52681	321	37193	North Carolina	Wilkes County	-291.037	-658.865	-259.617	-587.534	79.5642	180.121	70.9745	160.621		8.02506e-05	8.02697e-05	8.02147e-05	8.02522e-05	8.0294e-05	8.03133e-05	8.02581e-05	8.02958e-05		0.0802686	3.16024e-05
54602	2242	53001	Washington	Adams County	-291.063	-657.382	-259.953	-586.497	79.5702	179.714	71.0655	160.335		8.02577e-05	8.00891e-05	8.03186e-05	8.01106e-05	8.03001e-05	8.01316e-05	8.03611e-05	8.01531e-05		0.0802152	0.00010601
53589	1229	24037	Maryland	St. Mary's County	-290.976	-657.11	-259.686	-586.029	79.5476	179.642	70.9936	160.21		8.02337e-05	8.0056e-05	8.02362e-05	8.00466e-05	8.02772e-05	8.00996e-05	8.02797e-05	8.00901e-05		0.0801649	0.000100926
52531	171	51185	Virginia	Tazewell County	-290.27	-657.595	-258.851	-586.29	79.3545	179.774	70.7651	160.281		8.00391e-05	8.0115e-05	7.99781e-05	8.00822e-05	8.00823e-05	8.01585e-05	8.00213e-05	8.01257e-05		0.0800753	5.95553e-05
53590	1230	19043	Iowa	Clayton County	-290.697	-655.79	-259.291	-584.812	79.4708	179.28	70.8851	159.876		8.01568e-05	7.98952e-05	8.01141e-05	7.98803e-05	8.01997e-05	7.99381e-05	8.0157e-05	7.99233e-05		0.0800331	0.000135443
53591	1231	48253	Texas	Jones County	-289.779	-657.289	-258.533	-586.163	79.2199	179.69	70.6778	160.245		7.99037e-05	8.00777e-05	7.98798e-05	8.00649e-05	7.99466e-05	8.01209e-05	7.99226e-05	8.0108e-05		0.080003	9.93149e-05
53162	802	55047	Wisconsin	Green Lake County	-290.589	-654.485	-259.134	-583.459	79.4412	178.923	70.8423	159.506		8.01269e-05	7.97362e-05	8.00656e-05	7.96956e-05	8.01699e-05	7.97791e-05	8.01086e-05	7.97385e-05		0.0799275	0.00020651
55370	3010	48019	Texas	Bandera County	-289.903	-655.474	-258.595	-584.584	79.2541	179.194	70.6949	159.814		7.9938e-05	7.98567e-05	7.98988e-05	7.98493e-05	7.99811e-05	7.98999e-05	7.99419e-05	7.98925e-05		0.0799073	4.44852e-05
54265	1905	20021	Kansas	Cherokee County	-289.877	-653.585	-258.527	-582.688	79.2467	178.677	70.6762	159.295		7.99308e-05	7.96265e-05	7.9878e-05	7.95902e-05	7.99736e-05	7.96693e-05	7.99208e-05	7.9633e-05		0.0797778	0.000161673
54967	2607	48035	Texas	Bosque County	-288.821	-652.428	-257.543	-581.685	78.9583	178.362	70.4073	159.022		7.96396e-05	7.94856e-05	7.95739e-05	7.94533e-05	7.96825e-05	7.95286e-05	7.96167e-05	7.94963e-05		0.0795596	8.16867e-05
53592	1232	41023	Oregon	Grant County	-289.075	-651.459	-257.718	-580.702	79.0266	178.094	70.4543	158.751		7.97095e-05	7.93676e-05	7.96279e-05	7.9319e-05	7.97515e-05	7.94096e-05	7.96698e-05	7.9361e-05		0.079527	0.000178988
53855	1495	12131	Florida	Walton County	-288.279	-651.411	-257.177	-580.897	78.8105	178.084	70.3077	158.807		7.94901e-05	7.93617e-05	7.94609e-05	7.93456e-05	7.95333e-05	7.9405e-05	7.95041e-05	7.93889e-05		0.0794362	7.02385e-05
55114	2754	28071	Mississippi	Lafayette County	-286.465	-655.242	-255.645	-584.407	78.3141	179.131	69.8886	159.766		7.89897e-05	7.98283e-05	7.89874e-05	7.9825e-05	7.90324e-05	7.98717e-05	7.90301e-05	7.98684e-05		0.0794291	0.000448747
55371	3011	36003	New York	Allegany County	-287.097	-648.154	-256.125	-578.085	78.4871	177.193	70.0197	158.038		7.91642e-05	7.89649e-05	7.91357e-05	7.89615e-05	7.9207e-05	7.90077e-05	7.91785e-05	7.90044e-05		0.079078	0.00010298
52958	598	47183	Tennessee	Weakley County	-285.512	-649.72	-254.737	-579.499	78.0537	177.621	69.6404	158.424		7.87272e-05	7.91557e-05	7.8707e-05	7.91547e-05	7.87697e-05	7.91986e-05	7.87495e-05	7.91976e-05		0.0789575	0.000235518
52794	434	19197	Iowa	Wright County	-286.794	-646.962	-255.792	-576.91	78.4037	176.866	69.9284	157.715		7.90807e-05	7.88197e-05	7.9033e-05	7.8801e-05	7.91228e-05	7.88619e-05	7.90751e-05	7.88432e-05		0.0789547	0.00013505
53593	1233	54069	West Virginia	Ohio County	-286.181	-647.831	-255.266	-577.779	78.2365	177.105	69.7848	157.954		7.89114e-05	7.89255e-05	7.88702e-05	7.89197e-05	7.89541e-05	7.89683e-05	7.89128e-05	7.89625e-05		0.0789281	3.25355e-05
53669	1309	36033	New York	Franklin County	-285.956	-645.501	-255.146	-575.69	78.1752	176.468	69.7522	157.383		7.88496e-05	7.86417e-05	7.88333e-05	7.86344e-05	7.88922e-05	7.86844e-05	7.88759e-05	7.86772e-05		0.0787611	0.000111255
55266	2906	45075	South Carolina	Orangeburg County	-284.915	-647.686	-254.144	-577.539	77.8907	177.066	69.4784	157.889		7.85626e-05	7.89079e-05	7.85238e-05	7.88869e-05	7.86051e-05	7.89508e-05	7.85663e-05	7.89299e-05		0.0787417	0.000191558
55192	2832	47063	Tennessee	Hamblen County	-285.127	-645.936	-254.367	-576.1	77.9484	176.587	69.5392	157.495		7.86209e-05	7.86946e-05	7.85926e-05	7.86904e-05	7.86634e-05	7.87373e-05	7.86351e-05	7.87331e-05		0.0786709	5.23596e-05
53754	1394	39107	Ohio	Mercer County	-285.478	-644.635	-254.684	-574.936	78.0444	176.231	69.6259	157.177		7.87177e-05	7.85362e-05	7.86906e-05	7.85314e-05	7.87602e-05	7.85787e-05	7.87331e-05	7.85739e-05		0.0786402	9.44338e-05
53670	1310	22069	Louisiana	Natchitoches Parish	-284.529	-646.736	-253.863	-576.757	77.7851	176.806	69.4015	157.675		7.84561e-05	7.87922e-05	7.8437e-05	7.87801e-05	7.84985e-05	7.88349e-05	7.84793e-05	7.88229e-05		0.0786376	0.000183241
53755	1395	41031	Oregon	Jefferson County	-285.693	-644.077	-254.879	-574.305	78.1025	176.077	69.6788	157.003		7.87769e-05	7.84681e-05	7.87509e-05	7.84453e-05	7.88189e-05	7.85102e-05	7.87929e-05	7.84873e-05		0.0786313	0.000166246
52475	115	39005	Ohio	Ashland County	-284.967	-644.138	-254.217	-574.48	77.9045	176.095	69.4981	157.052		7.85767e-05	7.84756e-05	7.85463e-05	7.84691e-05	7.86191e-05	7.85181e-05	7.85886e-05	7.85116e-05		0.0785381	5.40238e-05
54968	2608	48055	Texas	Caldwell County	-283.745	-644.541	-253.271	-574.941	77.5706	176.205	69.2394	157.178		7.82399e-05	7.85247e-05	7.82539e-05	7.8532e-05	7.82821e-05	7.85672e-05	7.8296e-05	7.85745e-05		0.0784088	0.000152348
52396	36	42065	Pennsylvania	Jefferson County	-284.24	-642.674	-253.522	-573.176	77.706	175.695	69.3083	156.696		7.83764e-05	7.82972e-05	7.83317e-05	7.82911e-05	7.84188e-05	7.83398e-05	7.8374e-05	7.83336e-05		0.0783453	4.27478e-05
52476	116	13063	Georgia	Clayton County	-283.026	-644.136	-252.93	-574.933	77.3741	176.095	69.1463	157.176		7.80415e-05	7.84753e-05	7.81485e-05	7.8531e-05	7.80838e-05	7.8518e-05	7.81908e-05	7.85737e-05		0.0783203	0.000224123
52604	244	48459	Texas	Upshur County	-283.572	-642.976	-252.989	-573.491	77.5232	175.777	69.1624	156.782		7.81921e-05	7.8334e-05	7.81669e-05	7.8334e-05	7.82343e-05	7.83764e-05	7.8209e-05	7.83764e-05		0.0782779	8.62217e-05
52682	322	18037	Indiana	Dubois County	-283.939	-641.794	-253.382	-572.533	77.6236	175.454	69.2699	156.52		7.82934e-05	7.819e-05	7.82883e-05	7.82032e-05	7.83356e-05	7.82324e-05	7.83305e-05	7.82456e-05		0.0782649	5.54139e-05
52795	435	47047	Tennessee	Fayette County	-283.308	-641.531	-252.785	-572.261	77.4511	175.383	69.1067	156.445		7.81193e-05	7.81579e-05	7.81038e-05	7.8166e-05	7.81615e-05	7.82003e-05	7.8146e-05	7.82084e-05		0.0781579	3.5822e-05
52959	599	35057	New Mexico	Torrance County	-282.979	-642.243	-252.452	-572.776	77.3602	175.575	69.0149	156.584		7.80286e-05	7.82447e-05	7.8001e-05	7.82364e-05	7.80697e-05	7.82862e-05	7.80422e-05	7.82778e-05		0.0781483	0.000123227
53058	698	19105	Iowa	Jones County	-283.33	-639.022	-252.766	-569.923	77.4568	174.696	69.1012	155.806		7.81254e-05	7.78523e-05	7.8098e-05	7.78467e-05	7.81672e-05	7.78942e-05	7.81398e-05	7.78885e-05		0.0780015	0.000142296
53163	803	35043	New Mexico	Sandoval County	-282.274	-639.771	-251.934	-570.735	77.103	174.753	68.8158	155.896		7.78342e-05	7.79435e-05	7.7841e-05	7.79577e-05	7.78102e-05	7.79197e-05	7.7817e-05	7.79338e-05		0.0778821	6.20557e-05
53256	896	46067	South Dakota	Hutchinson County	-282.295	-636.673	-251.759	-567.759	77.1735	174.053	68.8255	155.213		7.78401e-05	7.75661e-05	7.77868e-05	7.75511e-05	7.78813e-05	7.76074e-05	7.7828e-05	7.75924e-05		0.0777066	0.000139543
53373	1013	47017	Tennessee	Carroll County	-281.457	-637.501	-251.015	-568.449	76.945	174.281	68.6228	155.403		7.76089e-05	7.7667e-05	7.7557e-05	7.76454e-05	7.76508e-05	7.77091e-05	7.75988e-05	7.76875e-05		0.0776406	4.99503e-05
53594	1234	39033	Ohio	Crawford County	-281.467	-636.781	-251.069	-567.986	76.9477	174.084	68.6376	155.277		7.76116e-05	7.75792e-05	7.75737e-05	7.75821e-05	7.76535e-05	7.76212e-05	7.76155e-05	7.76241e-05		0.0776076	2.7374e-05
53671	1311	22061	Louisiana	Lincoln Parish	-280.393	-637.459	-250.241	-568.592	76.6542	174.269	68.4114	155.442		7.73155e-05	7.76619e-05	7.73179e-05	7.76649e-05	7.73573e-05	7.77041e-05	7.73597e-05	7.7707e-05		0.077511	0.000186762
53756	1396	40153	Oklahoma	Woodward County	-280.859	-636.131	-250.671	-567.464	76.7811	173.905	68.5283	155.133		7.7444e-05	7.75001e-05	7.74506e-05	7.75108e-05	7.74854e-05	7.75417e-05	7.74919e-05	7.75524e-05		0.0774971	3.8515e-05
53856	1496	39135	Ohio	Preble County	-281.322	-634.989	-250.913	-566.185	76.9081	173.594	68.5948	154.784		7.75716e-05	7.7361e-05	7.75253e-05	7.73361e-05	7.76135e-05	7.74029e-05	7.75671e-05	7.7378e-05		0.0774694	0.00011096
54266	1906	18107	Indiana	Montgomery County	-280.189	-635.834	-250.002	-567.149	76.5984	173.825	68.3458	155.048		7.72593e-05	7.7464e-05	7.7244e-05	7.74678e-05	7.73009e-05	7.75059e-05	7.72856e-05	7.75098e-05		0.0773796	0.000116914
54409	2049	31131	Nebraska	Otoe County	-281.157	-633.676	-250.78	-565.04	76.8625	173.234	68.558	154.47		7.75263e-05	7.7201e-05	7.74843e-05	7.71797e-05	7.75675e-05	7.72422e-05	7.75256e-05	7.7221e-05		0.0773684	0.000170709
54490	2130	27043	Minnesota	Faribault County	-281.079	-633.276	-250.64	-564.578	76.8412	173.125	68.5198	154.344		7.75047e-05	7.71523e-05	7.74411e-05	7.71166e-05	7.7546e-05	7.71936e-05	7.74823e-05	7.71579e-05		0.0773243	0.000184307
54549	2189	20111	Kansas	Lyon County	-280.433	-634.278	-250.237	-565.646	76.6647	173.398	68.4098	154.636		7.73267e-05	7.72743e-05	7.73167e-05	7.72625e-05	7.73679e-05	7.73157e-05	7.73579e-05	7.73039e-05		0.0773157	3.64813e-05
54723	2363	22011	Louisiana	Beauregard Parish	-279.693	-633.813	-249.551	-565.224	76.4629	173.273	68.2226	154.522		7.71225e-05	7.72177e-05	7.71046e-05	7.72048e-05	7.71642e-05	7.72596e-05	7.71463e-05	7.72467e-05		0.0771833	5.74693e-05
54798	2438	33005	New Hampshire	Cheshire County	-279.518	-633.952	-249.365	-565.455	76.415	173.311	68.1718	154.585		7.70742e-05	7.72346e-05	7.70471e-05	7.72364e-05	7.71159e-05	7.72766e-05	7.70888e-05	7.72784e-05		0.077169	9.67359e-05
54969	2609	8117	Colorado	Summit County	-277.962	-635.437	-248.726	-567.631	75.988	173.713	67.9957	155.176		7.66452e-05	7.74155e-05	7.68498e-05	7.75336e-05	7.6685e-05	7.74559e-05	7.68897e-05	7.7574e-05		0.0771311	0.000399482
55308	2948	8093	Colorado	Park County	-279.969	-631.756	-249.954	-563.704	76.5367	172.707	68.3314	154.103		7.71985e-05	7.69671e-05	7.7229e-05	7.69972e-05	7.72387e-05	7.70073e-05	7.72692e-05	7.70374e-05		0.0771181	0.000126687
55372	3012	27071	Minnesota	Koochiching County	-279.757	-630.578	-249.475	-562.199	76.4798	172.387	68.2015	153.694		7.71401e-05	7.68235e-05	7.70812e-05	7.67917e-05	7.71813e-05	7.68647e-05	7.71223e-05	7.68329e-05		0.0769797	0.000165413
53463	1103	17165	Illinois	Saline County	-279.552	-630.96	-249.312	-562.602	76.4241	172.493	68.1571	153.805		7.70835e-05	7.68701e-05	7.70307e-05	7.68468e-05	7.7125e-05	7.69117e-05	7.70722e-05	7.68883e-05		0.0769786	0.00011065
55193	2833	19019	Iowa	Buchanan County	-279.102	-629.852	-249.014	-561.748	76.301	172.189	68.0755	153.571		7.69597e-05	7.67352e-05	7.69388e-05	7.67301e-05	7.70008e-05	7.67764e-05	7.69799e-05	7.67713e-05		0.0768615	0.000118102
52796	436	16081	Idaho	Teton County	-278.346	-627.58	-248.932	-560.483	76.0925	171.564	68.0516	153.221		7.6751e-05	7.64583e-05	7.69134e-05	7.65572e-05	7.67904e-05	7.64977e-05	7.69529e-05	7.65967e-05		0.0766897	0.000188911
52960	600	48219	Texas	Hockley County	-277.799	-629.127	-247.903	-561.105	75.9447	171.991	67.7715	153.395		7.66004e-05	7.66468e-05	7.65953e-05	7.66423e-05	7.66413e-05	7.66879e-05	7.66362e-05	7.66834e-05		0.0766417	3.33701e-05
53059	699	18055	Indiana	Greene County	-277.57	-627.646	-247.618	-559.77	75.8824	171.587	67.6941	153.03		7.65372e-05	7.64664e-05	7.65073e-05	7.64598e-05	7.65785e-05	7.65078e-05	7.65486e-05	7.65012e-05		0.0765134	4.02329e-05
53164	804	37085	North Carolina	Harnett County	-276.704	-627.143	-247.014	-559.532	75.646	171.45	67.5291	152.966		7.62984e-05	7.64051e-05	7.63207e-05	7.64274e-05	7.63398e-05	7.64467e-05	7.63621e-05	7.6469e-05		0.0763836	6.23882e-05
53757	1397	39129	Ohio	Pickaway County	-276.77	-626.507	-246.965	-558.879	75.6638	171.275	67.5156	152.787		7.63167e-05	7.63276e-05	7.63056e-05	7.63381e-05	7.63578e-05	7.63689e-05	7.63468e-05	7.63795e-05		0.0763426	2.56023e-05
53857	1497	5091	Arkansas	Miller County	-276.731	-625.845	-246.963	-558.256	75.6531	171.094	67.515	152.617		7.63058e-05	7.62469e-05	7.63049e-05	7.62531e-05	7.6347e-05	7.62882e-05	7.63461e-05	7.62944e-05		0.0762983	3.69441e-05
54669	2309	21019	Kentucky	Boyd County	-275.986	-625.467	-246.194	-557.841	75.4494	170.991	67.3048	152.503		7.61003e-05	7.62009e-05	7.60673e-05	7.61964e-05	7.61414e-05	7.62422e-05	7.61084e-05	7.62377e-05		0.0761618	6.64821e-05
54970	2610	27055	Minnesota	Houston County	-276.525	-623.304	-246.654	-555.79	75.5965	170.399	67.4303	151.942		7.62491e-05	7.59374e-05	7.62095e-05	7.59163e-05	7.62899e-05	7.59782e-05	7.62503e-05	7.5957e-05		0.0760985	0.000164017
53060	700	30091	Montana	Sheridan County	-276.253	-623.571	-246.313	-555.949	75.5214	170.471	67.3366	151.984		7.61739e-05	7.59699e-05	7.61042e-05	7.5938e-05	7.62141e-05	7.60102e-05	7.61444e-05	7.59782e-05		0.0760666	0.000105283
52797	437	31101	Nebraska	Keith County	-276.389	-622.841	-246.486	-555.328	75.5587	170.271	67.3838	151.814		7.62115e-05	7.5881e-05	7.61575e-05	7.58531e-05	7.62517e-05	7.59212e-05	7.61977e-05	7.58933e-05		0.0760459	0.000172582
54971	2611	36035	New York	Fulton County	-275.915	-622.602	-246.106	-555.227	75.43	170.208	67.2809	151.789		7.60807e-05	7.58519e-05	7.60403e-05	7.58394e-05	7.61219e-05	7.58931e-05	7.60814e-05	7.58806e-05		0.0759737	0.000118019
52397	37	1009	Alabama	Blount County	-275.501	-623.424	-245.81	-555.991	75.317	170.433	67.2	151.998		7.59667e-05	7.5952e-05	7.59487e-05	7.59437e-05	7.60079e-05	7.59933e-05	7.59899e-05	7.5985e-05		0.0759734	2.38574e-05
52477	117	31145	Nebraska	Red Willow County	-275.82	-622.597	-246.008	-555.133	75.4032	170.205	67.2532	151.762		7.60545e-05	7.58512e-05	7.60098e-05	7.58266e-05	7.60948e-05	7.58916e-05	7.605e-05	7.58669e-05		0.0759557	0.000107251
52605	245	16053	Idaho	Jerome County	-275.401	-622.963	-245.851	-555.75	75.2879	170.303	67.2096	151.929		7.5939e-05	7.58959e-05	7.59613e-05	7.59108e-05	7.59785e-05	7.59355e-05	7.60007e-05	7.59504e-05		0.0759465	3.42461e-05
52683	323	55077	Wisconsin	Marquette County	-276.069	-621.583	-246.184	-554.13	75.4719	169.929	67.3018	151.488		7.61233e-05	7.57277e-05	7.60643e-05	7.56894e-05	7.61641e-05	7.57685e-05	7.6105e-05	7.57302e-05		0.0759216	0.000208773
52798	438	39015	Ohio	Brown County	-274.46	-621.85	-244.841	-554.598	75.032	170.002	66.9348	151.617		7.56794e-05	7.57603e-05	7.56492e-05	7.57535e-05	7.57203e-05	7.58013e-05	7.569e-05	7.57945e-05		0.0757311	5.53958e-05
52902	542	27133	Minnesota	Rock County	-275.315	-620.139	-245.513	-552.874	75.2653	169.533	67.118	151.144		7.59154e-05	7.55518e-05	7.58569e-05	7.55179e-05	7.59557e-05	7.55921e-05	7.58972e-05	7.55582e-05		0.0757307	0.000190718
52961	601	47013	Tennessee	Campbell County	-274.249	-621.87	-244.619	-554.579	74.9744	170.008	66.8743	151.612		7.56213e-05	7.57627e-05	7.55807e-05	7.57509e-05	7.56621e-05	7.58038e-05	7.56215e-05	7.5792e-05		0.0756994	8.76373e-05
53061	701	28011	Mississippi	Bolivar County	-273.898	-620.827	-244.306	-553.53	74.8787	169.723	66.7888	151.325		7.55247e-05	7.56356e-05	7.54841e-05	7.56075e-05	7.55655e-05	7.56767e-05	7.55249e-05	7.56485e-05		0.0755835	6.89627e-05
53165	805	24015	Maryland	Cecil County	-274.247	-619.739	-244.709	-552.732	74.9742	169.425	66.8989	151.107		7.56209e-05	7.5503e-05	7.56084e-05	7.54986e-05	7.56619e-05	7.55441e-05	7.56494e-05	7.55397e-05		0.0755782	6.48668e-05
53257	897	46109	South Dakota	Roberts County	-274.345	-619.198	-244.784	-552.298	75	169.276	66.9187	150.987		7.56478e-05	7.54372e-05	7.56317e-05	7.54393e-05	7.56879e-05	7.54774e-05	7.56718e-05	7.54795e-05		0.0755591	0.000109973
53374	1014	53039	Washington	Klickitat County	-274.442	-618.65	-244.77	-551.601	75.027	169.126	66.9151	150.796		7.56747e-05	7.53704e-05	7.56274e-05	7.5344e-05	7.57151e-05	7.54108e-05	7.56678e-05	7.53844e-05		0.0755243	0.000159884
53758	1398	19165	Iowa	Shelby County	-274.366	-618.439	-244.695	-551.465	75.0059	169.068	66.8945	150.759		7.56536e-05	7.53447e-05	7.56042e-05	7.53254e-05	7.56939e-05	7.53849e-05	7.56445e-05	7.53657e-05		0.0755021	0.000159815
53858	1498	36079	New York	Putnam County	-273.837	-616.778	-244.342	-550.062	74.862	168.616	66.7987	150.377		7.55077e-05	7.51424e-05	7.54952e-05	7.51338e-05	7.55486e-05	7.51833e-05	7.55361e-05	7.51747e-05		0.0753402	0.000195552
53945	1585	38057	North Dakota	Mercer County	-273.243	-617.528	-243.816	-550.916	74.6986	168.818	66.654	150.608		7.5344e-05	7.52337e-05	7.53327e-05	7.52505e-05	7.53838e-05	7.52735e-05	7.53724e-05	7.52904e-05		0.0753101	5.61719e-05
54028	1668	39091	Ohio	Logan County	-273.142	-617.224	-243.695	-550.565	74.6718	168.737	66.6216	150.514		7.53161e-05	7.51967e-05	7.52953e-05	7.52025e-05	7.53567e-05	7.52374e-05	7.53358e-05	7.52432e-05		0.075273	6.12539e-05
54177	1817	8003	Colorado	Alamosa County	-272.688	-617.52	-243.358	-550.72	74.5465	168.815	66.5284	150.554		7.5191e-05	7.52327e-05	7.51913e-05	7.52237e-05	7.52303e-05	7.52721e-05	7.52305e-05	7.52631e-05		0.0752293	2.91054e-05
54410	2050	20175	Kansas	Seward County	-272.558	-617.317	-243.43	-550.766	74.5118	168.762	66.5486	150.568		7.51553e-05	7.5208e-05	7.52133e-05	7.523e-05	7.51952e-05	7.52482e-05	7.52533e-05	7.52702e-05		0.0752217	3.68274e-05
54491	2131	19161	Iowa	Sac County	-272.444	-614.271	-242.955	-547.71	74.4807	167.929	66.419	149.732		7.51238e-05	7.48369e-05	7.50668e-05	7.48126e-05	7.51638e-05	7.48769e-05	7.51067e-05	7.48525e-05		0.07498	0.000148057
54550	2190	39051	Ohio	Fulton County	-271.207	-614.172	-242.006	-547.938	74.1428	167.903	66.1598	149.796		7.47826e-05	7.48249e-05	7.47734e-05	7.48437e-05	7.48229e-05	7.48653e-05	7.48137e-05	7.48842e-05		0.0748263	3.79019e-05
54603	2243	29175	Missouri	Randolph County	-270.903	-614.722	-241.745	-548.399	74.0594	168.053	66.0884	149.921		7.46987e-05	7.48918e-05	7.46929e-05	7.49067e-05	7.47387e-05	7.49321e-05	7.47329e-05	7.4947e-05		0.0748176	0.000111095
54799	2439	38009	North Dakota	Bottineau County	-271.133	-613.978	-241.855	-547.638	74.122	167.848	66.118	149.712		7.47623e-05	7.48012e-05	7.47268e-05	7.48028e-05	7.48019e-05	7.4841e-05	7.47664e-05	7.48425e-05		0.0747931	3.96802e-05
54972	2612	13117	Georgia	Forsyth County	-271.248	-610.973	-242.287	-545.292	74.1541	167.029	66.2367	149.073		7.47939e-05	7.44351e-05	7.48601e-05	7.44823e-05	7.48343e-05	7.44755e-05	7.49005e-05	7.45227e-05		0.074663	0.000200424
55267	2907	18017	Indiana	Cass County	-270.545	-612.978	-241.379	-546.728	73.9618	167.576	65.9885	149.465		7.46e-05	7.46794e-05	7.45798e-05	7.46784e-05	7.46402e-05	7.47197e-05	7.46199e-05	7.47188e-05		0.0746545	5.28332e-05
55309	2949	53019	Washington	Ferry County	-271.073	-611.367	-241.729	-545.032	74.1055	167.135	66.0836	149		7.47456e-05	7.44831e-05	7.46879e-05	7.44467e-05	7.47852e-05	7.45227e-05	7.47275e-05	7.44864e-05		0.0746106	0.00013867
55373	3013	48067	Texas	Cass County	-270.428	-611.32	-241.175	-545.098	73.9301	167.123	65.9328	149.019		7.45679e-05	7.44774e-05	7.45167e-05	7.44558e-05	7.46082e-05	7.45178e-05	7.45569e-05	7.44961e-05		0.0745246	5.04112e-05
53759	1399	8039	Colorado	Elbert County	-270.403	-610.693	-241.379	-544.811	73.9221	166.949	65.9875	148.939		7.4561e-05	7.4401e-05	7.45797e-05	7.44165e-05	7.46001e-05	7.44401e-05	7.46188e-05	7.44557e-05		0.0745091	8.93271e-05
53465	1105	51121	Virginia	Montgomery County	-269.695	-611.957	-240.768	-545.954	73.7297	167.298	65.8216	149.254		7.43657e-05	7.45549e-05	7.43909e-05	7.45728e-05	7.4406e-05	7.45954e-05	7.44312e-05	7.46133e-05		0.0744913	0.000102232
53464	1104	22053	Louisiana	Jefferson Davis Parish	-269.956	-610.901	-240.85	-544.786	73.801	167.009	65.844	148.934		7.44377e-05	7.44263e-05	7.44162e-05	7.44132e-05	7.4478e-05	7.44667e-05	7.44565e-05	7.44536e-05		0.0744435	2.38739e-05
52799	439	8049	Colorado	Grand County	-270.027	-609.841	-241.13	-544.16	73.8187	166.716	65.9191	148.76		7.44572e-05	7.42972e-05	7.45028e-05	7.43277e-05	7.44958e-05	7.43359e-05	7.45415e-05	7.43664e-05		0.0744156	9.42225e-05
53062	702	20099	Kansas	Labette County	-270.116	-609.539	-240.895	-543.419	73.8443	166.636	65.856	148.56		7.44818e-05	7.42604e-05	7.44303e-05	7.42265e-05	7.45216e-05	7.43003e-05	7.44701e-05	7.42664e-05		0.0743697	0.000117904
54724	2364	55107	Wisconsin	Rusk County	-270.417	-608.873	-241.124	-542.774	73.9266	166.454	65.9185	148.383		7.45648e-05	7.41792e-05	7.4501e-05	7.41384e-05	7.46047e-05	7.4219e-05	7.45408e-05	7.41782e-05		0.0743658	0.000203146
52903	543	13047	Georgia	Catoosa County	-269.487	-609.077	-240.473	-543.249	73.6727	166.51	65.741	148.514		7.43082e-05	7.4204e-05	7.42998e-05	7.42032e-05	7.43485e-05	7.42444e-05	7.43401e-05	7.42436e-05		0.074274	5.78935e-05
52962	602	48149	Texas	Fayette County	-269.492	-608.573	-240.296	-542.575	73.674	166.372	65.6925	148.33		7.43097e-05	7.41427e-05	7.42452e-05	7.41112e-05	7.43497e-05	7.41829e-05	7.42852e-05	7.41513e-05		0.0742222	8.75323e-05
53375	1015	47177	Tennessee	Warren County	-268.71	-608.707	-239.712	-542.87	73.4603	166.409	65.5327	148.411		7.4094e-05	7.41591e-05	7.40645e-05	7.41515e-05	7.41341e-05	7.41994e-05	7.41046e-05	7.41918e-05		0.0741374	4.74393e-05
53258	898	28003	Mississippi	Alcorn County	-268.229	-606.218	-239.287	-540.583	73.3289	165.729	65.4167	147.785		7.39615e-05	7.38558e-05	7.39333e-05	7.38391e-05	7.40015e-05	7.38959e-05	7.39733e-05	7.38792e-05		0.0739174	5.88427e-05
54973	2613	29177	Missouri	Ray County	-267.916	-606.015	-239.042	-540.518	73.2428	165.672	65.3492	147.767		7.38751e-05	7.3831e-05	7.38575e-05	7.38302e-05	7.39146e-05	7.38707e-05	7.3897e-05	7.38698e-05		0.0738682	2.92265e-05
54974	2614	55023	Wisconsin	Crawford County	-268.477	-604.724	-239.428	-539.125	73.3963	165.319	65.4549	147.386		7.40299e-05	7.36737e-05	7.39769e-05	7.364e-05	7.40695e-05	7.37133e-05	7.40165e-05	7.36796e-05		0.0738499	0.000187957
52963	603	40139	Oklahoma	Texas County	-266.963	-607.103	-238.43	-541.752	72.9822	165.969	65.1816	148.103		7.36125e-05	7.39636e-05	7.36684e-05	7.39987e-05	7.36516e-05	7.4003e-05	7.37075e-05	7.40382e-05		0.0738304	0.000185098
52478	118	18169	Indiana	Wabash County	-267.814	-605.717	-238.89	-540.203	73.2154	165.592	65.3079	147.681		7.38471e-05	7.37948e-05	7.38105e-05	7.37871e-05	7.38869e-05	7.38347e-05	7.38503e-05	7.38271e-05		0.0738298	3.25879e-05
52800	440	36025	New York	Delaware County	-267.383	-603.537	-238.459	-538.182	73.0975	164.996	65.1903	147.129		7.37281e-05	7.35292e-05	7.36774e-05	7.35111e-05	7.3768e-05	7.35692e-05	7.37173e-05	7.35511e-05		0.0736314	0.000101942
52964	604	22087	Louisiana	St. Bernard Parish	-265.103	-605.736	-236.605	-540.24	72.4743	165.597	64.6835	147.692		7.30994e-05	7.3797e-05	7.31046e-05	7.37922e-05	7.3139e-05	7.38372e-05	7.31443e-05	7.38324e-05		0.0734683	0.000370982
53063	703	19119	Iowa	Lyon County	-266.493	-600.915	-237.722	-535.882	72.8536	164.277	64.9883	146.499		7.34828e-05	7.32097e-05	7.34499e-05	7.31969e-05	7.35218e-05	7.32487e-05	7.34889e-05	7.3236e-05		0.0733543	0.000142757
53166	806	51740	Virginia	Portsmouth city	-265.75	-602.341	-237.131	-537.18	72.6513	164.669	64.8273	146.855		7.3278e-05	7.33834e-05	7.32671e-05	7.33743e-05	7.33177e-05	7.34234e-05	7.33069e-05	7.34143e-05		0.0733456	6.0984e-05
53259	899	19121	Iowa	Madison County	-266.544	-600.356	-237.79	-535.417	72.8678	164.125	65.0069	146.372		7.3497e-05	7.31416e-05	7.34707e-05	7.31334e-05	7.35362e-05	7.31807e-05	7.35099e-05	7.31726e-05		0.0733303	0.000186597
53376	1016	17133	Illinois	Monroe County	-265.771	-600.384	-237.171	-535.594	72.6566	164.133	64.8379	146.421		7.32836e-05	7.3145e-05	7.32794e-05	7.31577e-05	7.3323e-05	7.31845e-05	7.33188e-05	7.31972e-05		0.0732361	7.28453e-05
53859	1499	16045	Idaho	Gem County	-265.944	-600.136	-237.173	-535.112	72.7035	164.065	64.8382	146.288		7.33314e-05	7.31148e-05	7.32802e-05	7.30917e-05	7.33704e-05	7.31539e-05	7.33192e-05	7.31308e-05		0.0732241	0.000112253
54029	1669	46027	South Dakota	Clay County	-264.581	-602.393	-236.166	-537.414	72.3307	164.682	64.5628	146.917		7.29555e-05	7.33898e-05	7.2969e-05	7.34062e-05	7.29942e-05	7.34289e-05	7.30077e-05	7.34453e-05		0.0731996	0.000234085
54800	2440	39039	Ohio	Defiance County	-265.72	-599.671	-237.064	-534.774	72.6427	163.939	64.8089	146.197		7.32695e-05	7.30581e-05	7.32465e-05	7.30456e-05	7.3309e-05	7.30977e-05	7.3286e-05	7.30852e-05		0.0731747	0.000112628
54975	2615	29219	Missouri	Warren County	-265.091	-600.869	-236.585	-536.027	72.4706	164.266	64.6778	146.539		7.30961e-05	7.32041e-05	7.30986e-05	7.32167e-05	7.31353e-05	7.32436e-05	7.31378e-05	7.32562e-05		0.0731736	6.42563e-05
55427	3067	27079	Minnesota	Le Sueur County	-265.374	-598.353	-236.853	-533.748	72.5478	163.577	64.7509	145.916		7.31742e-05	7.28975e-05	7.31814e-05	7.29055e-05	7.32132e-05	7.29366e-05	7.32204e-05	7.29445e-05		0.0730592	0.000149213
54267	1907	45073	South Carolina	Oconee County	-264.794	-599.64	-236.206	-534.751	72.3899	163.93	64.5744	146.191		7.30144e-05	7.30544e-05	7.29814e-05	7.30425e-05	7.30539e-05	7.3094e-05	7.30208e-05	7.30822e-05		0.073043	3.68405e-05
54492	2132	54045	West Virginia	Logan County	-264.423	-599.93	-235.81	-534.936	72.2882	164.01	64.4661	146.242		7.29119e-05	7.30897e-05	7.2859e-05	7.30678e-05	7.29513e-05	7.31294e-05	7.28984e-05	7.31074e-05		0.0730019	0.000107733
52801	441	55007	Wisconsin	Bayfield County	-265.178	-597.391	-236.449	-532.567	72.4944	163.315	64.6404	145.593		7.31202e-05	7.27804e-05	7.30564e-05	7.27441e-05	7.31593e-05	7.28195e-05	7.30955e-05	7.27832e-05		0.0729448	0.0001777
53167	807	56011	Wyoming	Crook County	-264.97	-597.32	-236.462	-532.731	72.4368	163.294	64.6434	145.636		7.30629e-05	7.27718e-05	7.30605e-05	7.27665e-05	7.31012e-05	7.28101e-05	7.30988e-05	7.28048e-05		0.0729346	0.000157728
53760	1400	48371	Texas	Pecos County	-264.39	-598.357	-235.954	-533.715	72.2792	163.579	64.5051	145.907		7.2903e-05	7.28981e-05	7.29033e-05	7.29009e-05	7.29421e-05	7.29373e-05	7.29424e-05	7.29402e-05		0.0729209	2.10616e-05
54268	1908	19129	Iowa	Mills County	-264.532	-596.157	-235.967	-531.623	72.3175	162.977	64.5083	145.335		7.2942e-05	7.26301e-05	7.29074e-05	7.26153e-05	7.29808e-05	7.26689e-05	7.29462e-05	7.26541e-05		0.0727931	0.000163389
54725	2365	31033	Nebraska	Cheyenne County	-264.473	-595.993	-235.935	-531.475	72.301	162.931	64.4994	145.293		7.29258e-05	7.26101e-05	7.28977e-05	7.2595e-05	7.29642e-05	7.26484e-05	7.2936e-05	7.26333e-05		0.0727763	0.000167002
54976	2616	20121	Kansas	Miami County	-264.126	-596.374	-235.734	-531.941	72.2066	163.036	64.4449	145.422		7.283e-05	7.26564e-05	7.28355e-05	7.26587e-05	7.28689e-05	7.26954e-05	7.28744e-05	7.26976e-05		0.0727646	9.5927e-05
54551	2191	18073	Indiana	Jasper County	-262.996	-594.937	-234.691	-530.717	71.898	162.644	64.16	145.088		7.25184e-05	7.24814e-05	7.25132e-05	7.24914e-05	7.25575e-05	7.25206e-05	7.25523e-05	7.25306e-05		0.0725207	2.64801e-05
55115	2755	27117	Minnesota	Pipestone County	-263.595	-593.878	-235.068	-529.468	72.0614	162.354	64.2626	144.745		7.26837e-05	7.23524e-05	7.26297e-05	7.23208e-05	7.27223e-05	7.2391e-05	7.26683e-05	7.23594e-05		0.072516	0.00017395
53946	1586	28113	Mississippi	Pike County	-262.721	-593.315	-234.361	-529.048	71.8231	162.202	64.07	144.632		7.24427e-05	7.22839e-05	7.24113e-05	7.22635e-05	7.24819e-05	7.23232e-05	7.24505e-05	7.23028e-05		0.07237	8.57328e-05
55374	3014	21185	Kentucky	Oldham County	-261.846	-593.605	-233.788	-529.78	71.5837	162.28	63.9133	144.832		7.22013e-05	7.23191e-05	7.22342e-05	7.23635e-05	7.22403e-05	7.23583e-05	7.22732e-05	7.24028e-05		0.0722991	7.24225e-05
54604	2244	30071	Montana	Phillips County	-261.971	-592.699	-233.724	-528.681	71.617	162.03	63.8949	144.529		7.22359e-05	7.22087e-05	7.22145e-05	7.22133e-05	7.22739e-05	7.22468e-05	7.22525e-05	7.22514e-05		0.0722371	2.32019e-05
53595	1235	55129	Wisconsin	Washburn County	-262.095	-590.1	-233.722	-526.071	71.6516	161.321	63.8949	143.817		7.22702e-05	7.18921e-05	7.22139e-05	7.18569e-05	7.23088e-05	7.19307e-05	7.22525e-05	7.18955e-05		0.0720776	0.000199117
53596	1236	18029	Indiana	Dearborn County	-260.751	-589.915	-232.714	-526.283	71.2844	161.272	63.6196	143.876		7.18994e-05	7.18695e-05	7.19023e-05	7.18858e-05	7.19382e-05	7.19085e-05	7.19412e-05	7.19248e-05		0.0719087	2.49847e-05
53672	1312	21035	Kentucky	Calloway County	-259.831	-591.84	-231.909	-528.055	71.0329	161.798	63.3994	144.36		7.16457e-05	7.21041e-05	7.16535e-05	7.21278e-05	7.16844e-05	7.21432e-05	7.16922e-05	7.21669e-05		0.0719023	0.000250422
55310	2950	13077	Georgia	Coweta County	-260.762	-589.475	-232.77	-525.862	71.2877	161.152	63.6352	143.761		7.19026e-05	7.1816e-05	7.19199e-05	7.18283e-05	7.19415e-05	7.18551e-05	7.19588e-05	7.18673e-05		0.0718862	5.25627e-05
53673	1313	39149	Ohio	Shelby County	-260.349	-587.736	-232.348	-524.24	71.1746	160.676	63.5197	143.317		7.17886e-05	7.16041e-05	7.17895e-05	7.16068e-05	7.18274e-05	7.16429e-05	7.18282e-05	7.16456e-05		0.0717166	0.000100294
52965	605	48341	Texas	Moore County	-259.61	-588.517	-231.848	-525.097	70.9718	160.888	63.3824	143.551		7.15847e-05	7.16993e-05	7.16349e-05	7.17239e-05	7.16228e-05	7.17376e-05	7.1673e-05	7.17622e-05		0.0716798	6.18778e-05
55116	2756	19175	Iowa	Union County	-260.21	-587.006	-232.057	-523.376	71.136	160.475	63.4397	143.08		7.17502e-05	7.15152e-05	7.16994e-05	7.14888e-05	7.17885e-05	7.15535e-05	7.17377e-05	7.15271e-05		0.0716325	0.000122786
52966	606	35041	New Mexico	Roosevelt County	-258.273	-590.607	-230.496	-526.768	70.6064	161.46	63.0127	144.007		7.12161e-05	7.19539e-05	7.1217e-05	7.19521e-05	7.1254e-05	7.19923e-05	7.12549e-05	7.19905e-05		0.0716039	0.000394308
54977	2617	31151	Nebraska	Saline County	-259.254	-587.098	-231.322	-523.581	70.8746	160.501	63.2388	143.136		7.14866e-05	7.15264e-05	7.14725e-05	7.15168e-05	7.15247e-05	7.15647e-05	7.15106e-05	7.15551e-05		0.0715197	3.11002e-05
54978	2618	36107	New York	Tioga County	-259.361	-584.519	-231.31	-521.149	70.9044	159.797	63.2358	142.472		7.15161e-05	7.12121e-05	7.14686e-05	7.11845e-05	7.15548e-05	7.12508e-05	7.15072e-05	7.12232e-05		0.0713647	0.00015985
54493	2133	46023	South Dakota	Charles Mix County	-258.988	-584.351	-231.132	-521.278	70.8018	159.749	63.1866	142.506		7.14133e-05	7.11917e-05	7.14136e-05	7.12022e-05	7.14512e-05	7.12297e-05	7.14515e-05	7.12401e-05		0.0713242	0.000117549
54030	1670	13153	Georgia	Houston County	-258.151	-583.773	-230.49	-520.824	70.5738	159.593	63.0118	142.384		7.11825e-05	7.11213e-05	7.12153e-05	7.11402e-05	7.12211e-05	7.11601e-05	7.12539e-05	7.11789e-05		0.0711842	4.42188e-05
53260	900	40133	Oklahoma	Seminole County	-257.26	-584.773	-229.469	-521.432	70.3297	159.866	62.7323	142.549		7.09368e-05	7.12432e-05	7.08998e-05	7.12233e-05	7.09748e-05	7.12816e-05	7.09378e-05	7.12616e-05		0.0710949	0.000170414
54031	1671	13223	Georgia	Paulding County	-257.688	-582.856	-230.177	-520.127	70.4473	159.342	62.9262	142.193		7.1055e-05	7.10096e-05	7.11186e-05	7.1045e-05	7.10934e-05	7.10482e-05	7.11571e-05	7.10836e-05		0.0710763	4.67871e-05
53761	1401	1001	Alabama	Autauga County	-257.559	-583.278	-229.829	-520.206	70.4121	159.458	62.831	142.215		7.10194e-05	7.1061e-05	7.10109e-05	7.10558e-05	7.1058e-05	7.10997e-05	7.10495e-05	7.10945e-05		0.0710561	3.12437e-05
52967	607	36073	New York	Orleans County	-256.46	-579.881	-228.825	-517.285	70.1114	158.529	62.5565	141.416		7.07162e-05	7.06472e-05	7.07008e-05	7.06567e-05	7.07545e-05	7.06855e-05	7.0739e-05	7.06951e-05		0.0706994	3.71293e-05
54979	2619	51800	Virginia	Suffolk city	-256.046	-579.958	-228.476	-517.252	69.9984	158.55	62.4611	141.407		7.06022e-05	7.06565e-05	7.05929e-05	7.06523e-05	7.06405e-05	7.06949e-05	7.06312e-05	7.06908e-05		0.0706452	3.69095e-05
54980	2620	55003	Wisconsin	Ashland County	-256.239	-577.614	-228.508	-514.917	70.0506	157.908	62.4696	140.768		7.06553e-05	7.0371e-05	7.0603e-05	7.03333e-05	7.06931e-05	7.04088e-05	7.06408e-05	7.03711e-05		0.0705095	0.000151394
53508	1148	46123	South Dakota	Tripp County	-255.923	-577.476	-228.261	-514.982	69.9639	157.87	62.4016	140.785		7.05683e-05	7.03542e-05	7.05265e-05	7.03422e-05	7.06056e-05	7.03916e-05	7.05639e-05	7.03796e-05		0.0704665	0.000109562
55375	3015	26019	Michigan	Benzie County	-255.641	-578.038	-228.022	-515.569	69.8874	158.024	62.3369	140.947		7.04906e-05	7.04225e-05	7.04528e-05	7.04224e-05	7.05285e-05	7.04606e-05	7.04907e-05	7.04604e-05		0.0704661	3.61246e-05
52647	287	19087	Iowa	Henry County	-255.756	-577.307	-228.155	-514.843	69.9185	157.824	62.3732	140.748		7.05221e-05	7.03335e-05	7.04939e-05	7.03232e-05	7.05598e-05	7.03713e-05	7.05317e-05	7.0361e-05		0.0704371	9.87556e-05
53532	1172	16013	Idaho	Blaine County	-255.081	-577.735	-227.966	-515.945	69.7332	157.939	62.3204	141.047		7.03361e-05	7.03857e-05	7.04354e-05	7.04738e-05	7.03728e-05	7.04225e-05	7.0472e-05	7.05106e-05		0.0704261	5.87943e-05
53597	1237	13073	Georgia	Columbia County	-254.884	-577.068	-227.574	-514.892	69.6807	157.76	62.2146	140.762		7.02817e-05	7.03044e-05	7.03143e-05	7.033e-05	7.03198e-05	7.03426e-05	7.03524e-05	7.03682e-05		0.0703267	2.76926e-05
54639	2279	29221	Missouri	Washington County	-254.908	-576.754	-227.402	-514.371	69.6869	157.673	62.1674	140.619		7.02883e-05	7.02662e-05	7.02612e-05	7.02588e-05	7.03261e-05	7.03042e-05	7.0299e-05	7.02967e-05		0.0702876	2.37558e-05
54981	2621	22039	Louisiana	Evangeline Parish	-254.82	-576.747	-227.368	-514.335	69.663	157.672	62.1583	140.61		7.0264e-05	7.02653e-05	7.02507e-05	7.02538e-05	7.0302e-05	7.03035e-05	7.02887e-05	7.0292e-05		0.0702775	2.14564e-05
53377	1017	20041	Kansas	Dickinson County	-254.986	-575.099	-227.478	-512.83	69.7081	157.22	62.188	140.197		7.03099e-05	7.00646e-05	7.02847e-05	7.00483e-05	7.03475e-05	7.01022e-05	7.03223e-05	7.00859e-05		0.0701957	0.000130811
53168	808	22115	Louisiana	Vernon Parish	-254.622	-574.881	-227.447	-512.967	69.6088	157.162	62.1797	140.236		7.02093e-05	7.00379e-05	7.0275e-05	7.00669e-05	7.02473e-05	7.0076e-05	7.0313e-05	7.0105e-05		0.0701663	0.000106913
52532	172	19191	Iowa	Winneshiek County	-254.534	-575.143	-227.119	-513.026	69.5844	157.232	62.0899	140.251		7.01851e-05	7.00699e-05	7.01738e-05	7.00751e-05	7.02226e-05	7.01075e-05	7.02114e-05	7.01127e-05		0.0701447	6.07702e-05
54982	2622	36017	New York	Chenango County	-254.6	-574.881	-227.086	-512.696	69.603	157.162	62.0813	140.162		7.02034e-05	7.0038e-05	7.01637e-05	7.00299e-05	7.02414e-05	7.00761e-05	7.02016e-05	7.0068e-05		0.0701278	8.38728e-05
54670	2310	36031	New York	Essex County	-254.774	-573.973	-227.216	-511.739	69.6506	156.914	62.1167	139.9		7.02515e-05	6.99274e-05	7.02038e-05	6.98992e-05	7.02895e-05	6.99654e-05	7.02417e-05	6.99372e-05		0.0700894	0.000170516
55376	3016	18151	Indiana	Steuben County	-253.052	-573.588	-225.815	-511.684	69.1795	156.808	61.7334	139.885		6.97765e-05	6.98804e-05	6.97707e-05	6.98917e-05	6.98141e-05	6.99182e-05	6.98083e-05	6.99296e-05		0.0698487	6.36586e-05
53598	1238	48331	Texas	Milam County	-253.285	-571.939	-225.943	-510.035	69.2432	156.357	61.7684	139.434		6.98407e-05	6.96796e-05	6.98103e-05	6.96665e-05	6.98784e-05	6.97173e-05	6.98479e-05	6.97042e-05		0.0697681	8.48632e-05
54032	1672	8099	Colorado	Prowers County	-252.9	-570.959	-225.656	-509.15	69.1373	156.088	61.6896	139.19		6.97345e-05	6.95601e-05	6.97218e-05	6.95456e-05	6.97714e-05	6.95971e-05	6.97587e-05	6.95825e-05		0.069659	9.60317e-05
54338	1978	18033	Indiana	De Kalb County	-252.371	-571.213	-225.234	-509.577	68.9935	156.159	61.5747	139.309		6.95888e-05	6.95911e-05	6.95912e-05	6.9604e-05	6.96263e-05	6.96288e-05	6.96287e-05	6.96417e-05		0.0696126	2.1101e-05
54033	1673	18069	Indiana	Huntington County	-252.246	-571.03	-225.062	-509.324	68.9594	156.109	61.5277	139.24		6.95544e-05	6.95688e-05	6.95382e-05	6.95694e-05	6.95919e-05	6.96065e-05	6.95757e-05	6.9607e-05		0.0695765	2.43025e-05
54983	2623	5059	Arkansas	Hot Spring County	-251.664	-570.396	-224.537	-508.722	68.8001	155.936	61.3843	139.075		6.93937e-05	6.94916e-05	6.9376e-05	6.94872e-05	6.94311e-05	6.95293e-05	6.94134e-05	6.95248e-05		0.0694559	5.9821e-05
55194	2834	54079	West Virginia	Putnam County	-251.822	-569.258	-224.703	-507.835	68.8435	155.624	61.4296	138.833		6.94374e-05	6.93529e-05	6.94272e-05	6.9366e-05	6.94749e-05	6.93905e-05	6.94647e-05	6.94036e-05		0.0694147	4.42204e-05
54984	2624	54099	West Virginia	Wayne County	-251.527	-569.749	-224.377	-508.163	68.7629	155.759	61.3405	138.922		6.93561e-05	6.94128e-05	6.93266e-05	6.94107e-05	6.93936e-05	6.94504e-05	6.9364e-05	6.94484e-05		0.0693953	4.41498e-05
55268	2908	21113	Kentucky	Jessamine County	-251.102	-568.627	-224.153	-507.37	68.6466	155.452	61.2791	138.705		6.92389e-05	6.9276e-05	6.92572e-05	6.93024e-05	6.92763e-05	6.93136e-05	6.92946e-05	6.934e-05		0.0692874	3.21903e-05
55195	2835	48353	Texas	Nolan County	-250.861	-567.044	-223.744	-505.579	68.5805	155.019	61.1674	138.215		6.91725e-05	6.90832e-05	6.91311e-05	6.90579e-05	6.92096e-05	6.91204e-05	6.91682e-05	6.90951e-05		0.0691297	5.11256e-05
55196	2836	51053	Virginia	Dinwiddie County	-250.328	-567.43	-223.266	-505.926	68.4352	155.125	61.0368	138.311		6.90255e-05	6.91302e-05	6.89831e-05	6.91052e-05	6.90629e-05	6.91678e-05	6.90205e-05	6.91428e-05		0.0690797	6.65382e-05
54494	2134	47089	Tennessee	Jefferson County	-250.27	-567.152	-223.28	-505.863	68.4192	155.049	61.0406	138.294		6.90095e-05	6.90963e-05	6.89875e-05	6.90966e-05	6.90467e-05	6.91338e-05	6.90248e-05	6.91341e-05		0.0690662	5.67144e-05
53261	901	46127	South Dakota	Union County	-250.723	-565.504	-223.833	-504.621	68.5424	154.597	61.1911	137.953		6.91344e-05	6.88956e-05	6.91583e-05	6.8927e-05	6.91711e-05	6.89323e-05	6.9195e-05	6.89637e-05		0.0690472	0.00012802
52533	173	36057	New York	Montgomery County	-250.659	-565.917	-223.585	-504.721	68.5256	154.711	61.124	137.982		6.91167e-05	6.89459e-05	6.90818e-05	6.89407e-05	6.91541e-05	6.89833e-05	6.91192e-05	6.89782e-05		0.06904	8.67625e-05
54178	1818	35049	New Mexico	Santa Fe County	-249.679	-565.838	-222.801	-504.775	68.2024	154.565	60.8605	137.884		6.88464e-05	6.89363e-05	6.88397e-05	6.8948e-05	6.88279e-05	6.89179e-05	6.88212e-05	6.89296e-05		0.0688834	5.41361e-05
54726	2366	27121	Minnesota	Pope County	-250.328	-564.105	-223.22	-502.917	68.4346	154.215	61.0237	137.487		6.90255e-05	6.87252e-05	6.8969e-05	6.86942e-05	6.90623e-05	6.87619e-05	6.90057e-05	6.87309e-05		0.0688718	0.000156868
54985	2625	19081	Iowa	Hancock County	-250.183	-564.049	-223.127	-502.954	68.395	154.199	60.9982	137.497		6.89856e-05	6.87183e-05	6.89402e-05	6.86992e-05	6.90223e-05	6.87551e-05	6.89769e-05	6.8736e-05		0.0688542	0.000138482
52606	246	24009	Maryland	Calvert County	-249.807	-564.585	-222.88	-503.445	68.2926	154.347	60.9314	137.633		6.88817e-05	6.87836e-05	6.88641e-05	6.87664e-05	6.8919e-05	6.8821e-05	6.89014e-05	6.88038e-05		0.0688426	5.67346e-05
53262	902	55061	Wisconsin	Kewaunee County	-250.173	-563.814	-223.151	-502.717	68.3924	154.136	61.0051	137.433		6.89827e-05	6.86897e-05	6.89477e-05	6.8667e-05	6.90197e-05	6.87267e-05	6.89847e-05	6.8704e-05		0.0688403	0.000155421
54495	2135	19025	Iowa	Calhoun County	-250.02	-563.707	-222.955	-502.614	68.3504	154.106	60.9512	137.404		6.89406e-05	6.86766e-05	6.88871e-05	6.86528e-05	6.89773e-05	6.87133e-05	6.89237e-05	6.86895e-05		0.0688076	0.000136382
52607	247	19077	Iowa	Guthrie County	-250.048	-563.502	-223.002	-502.457	68.3581	154.05	60.9642	137.361		6.89483e-05	6.86517e-05	6.89017e-05	6.86314e-05	6.89851e-05	6.86885e-05	6.89385e-05	6.86681e-05		0.0688017	0.000153993
55269	2909	17015	Illinois	Carroll County	-249.538	-563.512	-222.566	-502.557	68.2187	154.053	60.8451	137.389		6.88075e-05	6.86529e-05	6.87669e-05	6.8645e-05	6.88444e-05	6.86899e-05	6.88037e-05	6.8682e-05		0.0687365	7.80395e-05
55270	2910	42117	Pennsylvania	Tioga County	-249.183	-563.098	-222.258	-502.124	68.1221	153.941	60.7613	137.271		6.87097e-05	6.86024e-05	6.86718e-05	6.85859e-05	6.87469e-05	6.86397e-05	6.8709e-05	6.86232e-05		0.0686611	5.7479e-05
53674	1314	47051	Tennessee	Franklin County	-248.303	-563.306	-221.513	-502.426	67.8815	153.997	60.5576	137.354		6.84671e-05	6.86278e-05	6.84416e-05	6.86271e-05	6.85041e-05	6.86651e-05	6.84786e-05	6.86644e-05		0.0685595	9.5198e-05
54552	2192	27023	Minnesota	Chippewa County	-248.917	-561.136	-221.995	-500.309	68.0488	153.403	60.6887	136.774		6.86365e-05	6.83634e-05	6.85904e-05	6.8338e-05	6.8673e-05	6.83999e-05	6.86269e-05	6.83744e-05		0.0685003	0.000143204
54986	2626	18071	Indiana	Jackson County	-248.296	-562.127	-221.547	-501.4	67.8793	153.675	60.5667	137.073		6.8465e-05	6.84841e-05	6.84521e-05	6.84871e-05	6.85019e-05	6.85212e-05	6.8489e-05	6.85242e-05		0.0684906	2.50396e-05
55271	2911	12035	Florida	Flagler County	-247.86	-561.447	-221.055	-500.714	67.7604	153.49	60.4325	136.886		6.83448e-05	6.84013e-05	6.83e-05	6.83933e-05	6.83819e-05	6.84387e-05	6.83371e-05	6.84306e-05		0.0683785	4.79519e-05
53378	1018	55103	Wisconsin	Richland County	-247.764	-558.452	-221.025	-497.966	67.7337	152.67	60.4239	136.134		6.83184e-05	6.80364e-05	6.82909e-05	6.8018e-05	6.8355e-05	6.8073e-05	6.83274e-05	6.80546e-05		0.0681842	0.000150087
52968	608	8125	Colorado	Yuma County	-247.71	-558.571	-220.943	-498.005	67.7185	152.701	60.4009	136.143		6.83036e-05	6.80509e-05	6.82655e-05	6.80232e-05	6.83396e-05	6.80869e-05	6.83015e-05	6.80592e-05		0.0681788	0.000134854
53064	704	39071	Ohio	Highland County	-246.154	-558.76	-219.598	-498.32	67.2939	152.754	60.034	136.231		6.78746e-05	6.8074e-05	6.785e-05	6.80664e-05	6.79112e-05	6.81108e-05	6.78866e-05	6.81032e-05		0.0679846	0.000113339
53379	1019	37109	North Carolina	Lincoln County	-246.436	-557.922	-219.887	-497.693	67.371	152.526	60.113	136.06		6.79522e-05	6.79719e-05	6.79391e-05	6.79807e-05	6.7989e-05	6.80088e-05	6.79759e-05	6.80177e-05		0.0679794	2.63385e-05
53509	1149	51067	Virginia	Franklin County	-246.314	-557.418	-219.744	-497.143	67.3378	152.388	60.0741	135.91		6.79187e-05	6.79104e-05	6.78951e-05	6.79056e-05	6.79555e-05	6.79474e-05	6.79319e-05	6.79425e-05		0.0679259	2.17027e-05
53860	1500	44005	Rhode Island	Newport County	-246.621	-556.756	-219.978	-496.516	67.4216	152.207	60.1379	135.738		6.80032e-05	6.78299e-05	6.79672e-05	6.78198e-05	6.804e-05	6.78668e-05	6.8004e-05	6.78567e-05		0.0679235	8.90456e-05
54034	1674	42009	Pennsylvania	Bedford County	-245.955	-557.651	-219.372	-497.335	67.2395	152.451	59.9721	135.962		6.78195e-05	6.79388e-05	6.77799e-05	6.79318e-05	6.78562e-05	6.79757e-05	6.78166e-05	6.79687e-05		0.0678859	7.66625e-05
54411	2051	18145	Indiana	Shelby County	-245.706	-555.849	-219.245	-495.82	67.1713	151.959	59.9373	135.548		6.77509e-05	6.77193e-05	6.77407e-05	6.77248e-05	6.77874e-05	6.7756e-05	6.77773e-05	6.77615e-05		0.0677522	2.37054e-05
54801	2441	51061	Virginia	Fauquier County	-245.719	-555.114	-219.255	-495.132	67.1752	151.758	59.9403	135.36		6.77546e-05	6.76298e-05	6.77439e-05	6.76308e-05	6.77913e-05	6.76666e-05	6.77806e-05	6.76676e-05		0.0677082	6.66545e-05
54987	2627	21179	Kentucky	Nelson County	-244.982	-556.02	-218.686	-496.136	66.9734	152.005	59.7846	135.634		6.75513e-05	6.77401e-05	6.75681e-05	6.77681e-05	6.75877e-05	6.77769e-05	6.76046e-05	6.78048e-05		0.0676752	0.000106532
53675	1315	5111	Arkansas	Poinsett County	-244.393	-555.762	-217.984	-495.551	66.8125	151.935	59.5927	135.474		6.7389e-05	6.77088e-05	6.73513e-05	6.76881e-05	6.74253e-05	6.77454e-05	6.73876e-05	6.77248e-05		0.0675525	0.000177393
52904	544	37195	North Carolina	Wilson County	-244.92	-554.44	-218.492	-494.478	66.9567	151.574	59.7319	135.181		6.75342e-05	6.75476e-05	6.75083e-05	6.75415e-05	6.75708e-05	6.75844e-05	6.75449e-05	6.75783e-05		0.0675513	2.53382e-05
53065	705	50023	Vermont	Washington County	-244.959	-554.151	-218.545	-494.213	66.9673	151.495	59.7463	135.109		6.7545e-05	6.75125e-05	6.75246e-05	6.75053e-05	6.75816e-05	6.75492e-05	6.75612e-05	6.7542e-05		0.0675402	2.53144e-05
53169	809	20061	Kansas	Geary County	-244.612	-552.341	-218.524	-492.842	66.8719	150.999	59.7401	134.733		6.74492e-05	6.7292e-05	6.75181e-05	6.73181e-05	6.74853e-05	6.73281e-05	6.75542e-05	6.73543e-05		0.0674124	0.000101309
55377	3017	17131	Illinois	Mercer County	-244.296	-551.674	-217.934	-492.053	66.7858	150.817	59.5787	134.518		6.73622e-05	6.72106e-05	6.73357e-05	6.72103e-05	6.73983e-05	6.72468e-05	6.73718e-05	6.72465e-05		0.0672978	7.71349e-05
52434	74	12011	Florida	Broward County	-243.859	-552.518	-217.613	-492.836	66.6367	150.98	59.4645	134.672		6.72417e-05	6.73135e-05	6.72365e-05	6.73173e-05	6.72479e-05	6.73198e-05	6.72426e-05	6.73236e-05		0.0672804	4.10286e-05
52609	249	51195	Virginia	Wise County	-243.305	-553.12	-217.012	-493.187	66.5151	151.213	59.3271	134.828		6.7089e-05	6.73868e-05	6.7051e-05	6.73652e-05	6.71252e-05	6.74234e-05	6.70873e-05	6.74018e-05		0.0672412	0.000165649
53068	708	27161	Minnesota	Waseca County	-244.315	-550.515	-217.96	-490.914	66.7907	150.499	59.5857	134.206		6.73674e-05	6.70694e-05	6.73438e-05	6.70547e-05	6.74033e-05	6.71054e-05	6.73797e-05	6.70906e-05		0.0672268	0.000158402
52970	610	42115	Pennsylvania	Susquehanna County	-244.228	-550.713	-217.806	-490.986	66.7675	150.555	59.5441	134.226		6.73435e-05	6.70936e-05	6.72962e-05	6.70645e-05	6.73799e-05	6.71301e-05	6.73326e-05	6.71009e-05		0.0672177	0.000131849
54991	2631	54025	West Virginia	Greenbrier County	-242.984	-552.387	-216.725	-492.639	66.4274	151.012	59.2485	134.678		6.70005e-05	6.72976e-05	6.69622e-05	6.72904e-05	6.70367e-05	6.73341e-05	6.69984e-05	6.73269e-05		0.0671558	0.00016899
53468	1108	26137	Michigan	Otsego County	-243.364	-549.92	-217.081	-490.396	66.531	150.337	59.3458	134.065		6.71052e-05	6.69969e-05	6.70723e-05	6.6984e-05	6.71412e-05	6.70331e-05	6.71083e-05	6.70202e-05		0.0670576	5.7494e-05
53263	903	40001	Oklahoma	Adair County	-242.808	-549.302	-216.594	-489.821	66.379	150.168	59.2125	133.907		6.69519e-05	6.69216e-05	6.69217e-05	6.69054e-05	6.69878e-05	6.69577e-05	6.69577e-05	6.69415e-05		0.0669432	2.63054e-05
53676	1316	18061	Indiana	Harrison County	-242.546	-549.092	-216.447	-489.835	66.3076	150.112	59.1726	133.912		6.68797e-05	6.68961e-05	6.68764e-05	6.69073e-05	6.69158e-05	6.69324e-05	6.69125e-05	6.69436e-05		0.066908	2.35585e-05
54605	2245	27157	Minnesota	Wabasha County	-242.889	-547.475	-216.681	-488.224	66.4009	149.669	59.2361	133.47		6.69742e-05	6.66991e-05	6.69485e-05	6.66872e-05	6.701e-05	6.67349e-05	6.69843e-05	6.6723e-05		0.0668451	0.000145003
53861	1501	46125	South Dakota	Turner County	-242.502	-547.252	-216.337	-488.105	66.2949	149.607	59.142	133.437		6.68675e-05	6.66719e-05	6.68425e-05	6.6671e-05	6.6903e-05	6.67074e-05	6.68779e-05	6.67065e-05		0.066781	0.000100356
52479	119	32027	Nevada	Pershing County	-241.461	-545.689	-215.459	-486.711	66.0095	149.178	58.9013	133.055		6.65804e-05	6.64816e-05	6.65711e-05	6.64806e-05	6.66149e-05	6.65162e-05	6.66057e-05	6.65152e-05		0.0665457	5.39753e-05
52684	324	19075	Iowa	Grundy County	-241.699	-544.933	-215.573	-485.925	66.0755	148.973	58.9334	132.842		6.6646e-05	6.63893e-05	6.66064e-05	6.63732e-05	6.66816e-05	6.6425e-05	6.6642e-05	6.64088e-05		0.0665215	0.000133262
53762	1402	16073	Idaho	Owyhee County	-241.345	-545.242	-215.375	-486.337	65.9784	149.057	58.8787	132.954		6.65484e-05	6.6427e-05	6.6545e-05	6.64295e-05	6.65835e-05	6.64622e-05	6.65802e-05	6.64648e-05		0.0665051	6.60418e-05
53862	1502	5083	Arkansas	Logan County	-240.971	-545.516	-214.942	-486.457	65.8767	149.134	58.7609	132.988		6.64452e-05	6.64604e-05	6.64112e-05	6.6446e-05	6.6481e-05	6.64963e-05	6.6447e-05	6.64819e-05		0.0664586	2.72224e-05
55378	3018	19137	Iowa	Montgomery County	-241.119	-543.528	-215.023	-484.621	65.917	148.589	58.7829	132.485		6.64862e-05	6.62182e-05	6.64365e-05	6.61952e-05	6.65216e-05	6.62536e-05	6.64719e-05	6.62306e-05		0.0663517	0.000138979
53466	1106	47003	Tennessee	Bedford County	-240.189	-545.041	-214.367	-486.223	65.6631	149.004	58.604	132.924		6.62296e-05	6.64025e-05	6.62338e-05	6.64139e-05	6.62654e-05	6.64386e-05	6.62696e-05	6.645e-05		0.0663379	9.64948e-05
53467	1107	17187	Illinois	Warren County	-240.181	-542.534	-214.247	-483.846	65.6607	148.318	58.571	132.274		6.62274e-05	6.60971e-05	6.61968e-05	6.60892e-05	6.62629e-05	6.61327e-05	6.62323e-05	6.61248e-05		0.0661704	6.73824e-05
53066	706	29117	Missouri	Livingston County	-240.062	-542.82	-214.109	-484.071	65.628	148.396	58.533	132.335		6.61946e-05	6.6132e-05	6.61538e-05	6.612e-05	6.623e-05	6.61675e-05	6.61892e-05	6.61555e-05		0.0661678	3.5778e-05
52534	174	19005	Iowa	Allamakee County	-240.329	-542.092	-214.354	-483.397	65.701	148.197	58.6002	132.151		6.62682e-05	6.60433e-05	6.62298e-05	6.6028e-05	6.63036e-05	6.60788e-05	6.62652e-05	6.60635e-05		0.06616	0.000116634
52608	248	31039	Nebraska	Cuming County	-240.219	-541.339	-214.219	-482.631	65.6709	147.99	58.5629	131.941		6.62381e-05	6.59515e-05	6.61879e-05	6.59233e-05	6.62733e-05	6.59866e-05	6.6223e-05	6.59585e-05		0.0660928	0.000150091
52685	325	51155	Virginia	Pulaski County	-239.647	-542.361	-213.748	-483.606	65.515	148.271	58.4346	132.209		6.60801e-05	6.6076e-05	6.60423e-05	6.60565e-05	6.61159e-05	6.61119e-05	6.6078e-05	6.60923e-05		0.0660816	2.51638e-05
52969	609	29121	Missouri	Macon County	-239.95	-541.45	-213.998	-482.749	65.5974	148.022	58.5027	131.974		6.61637e-05	6.59651e-05	6.61195e-05	6.59395e-05	6.61991e-05	6.60005e-05	6.61549e-05	6.59749e-05		0.0660647	0.000104742
53067	707	36039	New York	Greene County	-239.883	-541.106	-213.948	-482.488	65.5797	147.928	58.4895	131.903		6.61453e-05	6.59231e-05	6.61043e-05	6.59038e-05	6.61812e-05	6.5959e-05	6.61401e-05	6.59397e-05		0.0660371	0.000115845
53599	1239	1047	Alabama	Dallas County	-238.994	-542.93	-213.165	-484.076	65.3368	148.427	58.2755	132.338		6.59003e-05	6.61454e-05	6.58624e-05	6.61207e-05	6.5936e-05	6.61815e-05	6.58981e-05	6.61568e-05		0.0660251	0.000137083
53677	1317	29003	Missouri	Andrew County	-239.469	-541.2	-213.614	-482.595	65.4658	147.953	58.3977	131.932		6.60311e-05	6.59346e-05	6.6001e-05	6.59184e-05	6.60663e-05	6.59699e-05	6.60362e-05	6.59537e-05		0.0659889	5.30132e-05
53947	1587	19095	Iowa	Iowa County	-239.558	-540.056	-213.704	-481.639	65.4902	147.64	58.4224	131.671		6.60556e-05	6.57952e-05	6.60288e-05	6.57879e-05	6.60909e-05	6.58305e-05	6.60642e-05	6.58232e-05		0.0659345	0.000135722
54412	2052	28107	Mississippi	Panola County	-238.132	-542.37	-212.459	-483.655	65.101	148.274	58.0824	132.222		6.56626e-05	6.60771e-05	6.56442e-05	6.60632e-05	6.56981e-05	6.6113e-05	6.56797e-05	6.6099e-05		0.0658796	0.000223835
54553	2193	48293	Texas	Limestone County	-238.96	-539.913	-213.154	-481.415	65.3271	147.602	58.2723	131.61		6.58908e-05	6.57779e-05	6.5859e-05	6.57572e-05	6.59263e-05	6.58135e-05	6.58944e-05	6.57928e-05		0.065839	6.20894e-05
54727	2367	28045	Mississippi	Hancock County	-238.179	-539.856	-212.54	-481.513	65.1139	147.587	58.1046	131.637		6.56755e-05	6.57709e-05	6.56692e-05	6.57707e-05	6.57111e-05	6.58067e-05	6.57048e-05	6.58065e-05		0.0657394	5.60737e-05
54802	2442	46121	South Dakota	Todd County	-233.242	-550.73	-208.264	-491.258	63.7632	150.558	56.9348	134.299		6.43141e-05	6.70957e-05	6.4348e-05	6.71017e-05	6.43481e-05	6.71313e-05	6.4382e-05	6.71373e-05		0.0657323	0.00148
53678	1318	18051	Indiana	Gibson County	-238.075	-538.544	-212.43	-480.375	65.0852	147.228	58.0744	131.325		6.56468e-05	6.56111e-05	6.56352e-05	6.56152e-05	6.56822e-05	6.56466e-05	6.56706e-05	6.56507e-05		0.0656448	2.45365e-05
52398	38	17173	Illinois	Shelby County	-237.769	-537.258	-212.119	-479.22	65.0015	146.876	57.9893	131.01		6.55625e-05	6.54544e-05	6.55392e-05	6.54575e-05	6.55977e-05	6.54898e-05	6.55744e-05	6.54928e-05		0.065521	5.48191e-05
52802	442	27033	Minnesota	Cottonwood County	-238.063	-536.72	-212.314	-478.55	65.0815	146.728	58.0423	130.825		6.56436e-05	6.53888e-05	6.55995e-05	6.53659e-05	6.56785e-05	6.54237e-05	6.56344e-05	6.54008e-05		0.0655169	0.000133189
53763	1403	18183	Indiana	Whitley County	-236.259	-534.245	-210.803	-476.53	64.5889	146.052	57.6294	130.274		6.51462e-05	6.50872e-05	6.51324e-05	6.509e-05	6.51813e-05	6.51225e-05	6.51675e-05	6.51252e-05		0.0651315	3.33682e-05
54988	2628	31023	Nebraska	Butler County	-236.48	-532.628	-210.9	-474.878	64.6489	145.609	57.6557	129.822		6.52071e-05	6.48902e-05	6.51625e-05	6.48644e-05	6.52418e-05	6.4925e-05	6.51972e-05	6.48991e-05		0.0650484	0.000166539
54989	2629	1021	Alabama	Chilton County	-235.703	-533.848	-210.272	-476.04	64.4369	145.944	57.4846	130.141		6.49927e-05	6.50389e-05	6.49684e-05	6.5023e-05	6.5028e-05	6.50743e-05	6.50037e-05	6.50584e-05		0.0650234	3.47174e-05
55140	2780	26133	Michigan	Osceola County	-235.56	-533.803	-210.171	-476.254	64.3975	145.931	57.4567	130.199		6.49532e-05	6.50334e-05	6.49372e-05	6.50523e-05	6.49882e-05	6.50686e-05	6.49721e-05	6.50875e-05		0.0650116	5.62967e-05
54339	1979	18103	Indiana	Miami County	-235.362	-532.597	-210.005	-475.065	64.3435	145.602	57.4115	129.874		6.48987e-05	6.48865e-05	6.4886e-05	6.48899e-05	6.49337e-05	6.49216e-05	6.4921e-05	6.4925e-05		0.0649078	1.95012e-05
54990	2630	22067	Louisiana	Morehouse Parish	-235.162	-532.429	-209.76	-474.735	64.2888	145.556	57.3446	129.784		6.48434e-05	6.4866e-05	6.48103e-05	6.48448e-05	6.48785e-05	6.49012e-05	6.48453e-05	6.488e-05		0.0648587	2.84269e-05
54035	1675	17083	Illinois	Jersey County	-235.427	-531.616	-210.005	-474.1	64.3613	145.334	57.4113	129.61		6.49167e-05	6.4767e-05	6.48859e-05	6.4758e-05	6.49516e-05	6.4802e-05	6.49208e-05	6.4793e-05		0.0648494	7.74366e-05
54606	2246	16075	Idaho	Payette County	-235.271	-531.456	-209.93	-474.014	64.3182	145.289	57.3904	129.586		6.48736e-05	6.47475e-05	6.48627e-05	6.47463e-05	6.49081e-05	6.47821e-05	6.48972e-05	6.47809e-05		0.0648248	6.74706e-05
54671	2311	47021	Tennessee	Cheatham County	-234.111	-531.991	-208.942	-474.609	64.0016	145.437	57.1209	129.749		6.45537e-05	6.48127e-05	6.45575e-05	6.48276e-05	6.45886e-05	6.48479e-05	6.45924e-05	6.48627e-05		0.0647054	0.000142821
55197	2837	8055	Colorado	Huerfano County	-235.112	-530.014	-209.579	-472.405	64.2741	144.894	57.2941	129.144		6.48296e-05	6.45718e-05	6.47544e-05	6.45265e-05	6.48636e-05	6.46058e-05	6.47883e-05	6.45604e-05		0.0646876	0.000135222
54081	1721	20059	Kansas	Franklin County	-234.69	-530.431	-209.429	-473.066	64.1594	145.009	57.2537	129.327		6.47133e-05	6.46226e-05	6.4708e-05	6.46169e-05	6.47479e-05	6.46573e-05	6.47426e-05	6.46515e-05		0.0646825	5.20726e-05
53264	904	19007	Iowa	Appanoose County	-234.535	-528.818	-209.144	-471.484	64.1171	144.568	57.1758	128.894		6.46706e-05	6.44261e-05	6.46199e-05	6.44007e-05	6.47052e-05	6.44607e-05	6.46545e-05	6.44353e-05		0.0645466	0.000127135
54554	2194	21071	Kentucky	Floyd County	-233.244	-531.412	-208.051	-473.901	63.7645	145.278	56.8773	129.556		6.43146e-05	6.47421e-05	6.42823e-05	6.47309e-05	6.43494e-05	6.47772e-05	6.4317e-05	6.47661e-05		0.0645349	0.000235358
55379	3019	5103	Arkansas	Ouachita County	-233.953	-528.912	-208.658	-471.606	63.9584	144.595	57.0433	128.928		6.45102e-05	6.44376e-05	6.44698e-05	6.44173e-05	6.45451e-05	6.44726e-05	6.45047e-05	6.44523e-05		0.0644762	4.1895e-05
52803	443	17067	Illinois	Hancock County	-233.967	-528.608	-208.749	-471.543	63.9619	144.511	57.0679	128.911		6.4514e-05	6.44005e-05	6.44979e-05	6.44088e-05	6.45486e-05	6.44352e-05	6.45325e-05	6.44435e-05		0.0644726	5.76043e-05
53600	1240	48389	Texas	Reeves County	-233.339	-528.95	-208.21	-471.752	63.7902	144.604	56.9204	128.967		6.43409e-05	6.44422e-05	6.43312e-05	6.44373e-05	6.43753e-05	6.44768e-05	6.43657e-05	6.44719e-05		0.0644052	5.86075e-05
55428	3068	45031	South Carolina	Darlington County	-232.768	-529.343	-207.622	-472.006	63.6344	144.713	56.7601	129.038		6.41833e-05	6.44901e-05	6.41496e-05	6.4472e-05	6.42181e-05	6.45252e-05	6.41844e-05	6.45071e-05		0.0643412	0.000169906
52610	250	13113	Georgia	Fayette County	-233.482	-527.181	-208.332	-470.252	63.8296	144.122	56.9542	128.558		6.43802e-05	6.42267e-05	6.43691e-05	6.42325e-05	6.44151e-05	6.42616e-05	6.44039e-05	6.42674e-05		0.0643196	7.98616e-05
53380	1020	25011	Massachusetts	Franklin County	-232.444	-526.296	-207.347	-469.452	63.546	143.88	56.6848	128.34		6.40941e-05	6.41188e-05	6.40646e-05	6.41232e-05	6.41288e-05	6.41537e-05	6.40993e-05	6.41581e-05		0.0641176	3.11643e-05
52611	251	39059	Ohio	Guernsey County	-231.938	-525.826	-206.924	-469.018	63.4074	143.751	56.5692	128.221		6.39544e-05	6.40616e-05	6.3934e-05	6.40639e-05	6.3989e-05	6.40964e-05	6.39685e-05	6.40987e-05		0.0640208	6.65202e-05
52535	175	31031	Nebraska	Cherry County	-232.179	-523.249	-207.084	-466.567	63.4726	143.045	56.6122	127.549		6.4021e-05	6.37476e-05	6.39834e-05	6.37291e-05	6.40548e-05	6.37814e-05	6.40172e-05	6.37629e-05		0.0638871	0.000143061
52905	545	29055	Missouri	Crawford County	-231.113	-524.304	-206.199	-467.718	63.1819	143.335	56.3707	127.865		6.37272e-05	6.38762e-05	6.37099e-05	6.38864e-05	6.37615e-05	6.39107e-05	6.37442e-05	6.39208e-05		0.0638171	8.92778e-05
54496	2136	19101	Iowa	Jefferson County	-230.605	-521.109	-205.722	-464.767	63.0428	142.461	56.2403	127.058		6.3587e-05	6.3487e-05	6.35626e-05	6.34833e-05	6.36211e-05	6.35211e-05	6.35966e-05	6.35174e-05		0.063547	5.21044e-05
52399	39	29039	Missouri	Cedar County	-230.675	-520.6	-205.692	-464.153	63.0619	142.322	56.2322	126.89		6.36063e-05	6.34249e-05	6.35534e-05	6.33994e-05	6.36404e-05	6.3459e-05	6.35875e-05	6.34335e-05		0.063513	9.41205e-05
53764	1404	48057	Texas	Calhoun County	-230.141	-520.833	-205.326	-464.484	62.9163	142.386	56.1323	126.981		6.34591e-05	6.34533e-05	6.34403e-05	6.34446e-05	6.34933e-05	6.34877e-05	6.34745e-05	6.3479e-05		0.0634665	1.99486e-05
54803	2443	18027	Indiana	Daviess County	-230.035	-520.468	-205.274	-464.258	62.8873	142.286	56.118	126.919		6.34299e-05	6.34089e-05	6.34242e-05	6.34138e-05	6.34641e-05	6.34432e-05	6.34584e-05	6.34481e-05		0.0634363	2.03304e-05
53381	1021	28095	Mississippi	Monroe County	-229.735	-520.107	-204.955	-463.823	62.8053	142.188	56.031	126.801		6.33471e-05	6.33648e-05	6.33256e-05	6.33543e-05	6.33814e-05	6.33993e-05	6.33599e-05	6.33887e-05		0.0633651	2.39502e-05
52804	444	18133	Indiana	Putnam County	-229.451	-520.409	-204.806	-464.302	62.7276	142.27	55.99	126.931		6.32688e-05	6.34017e-05	6.32795e-05	6.34198e-05	6.33029e-05	6.3436e-05	6.33137e-05	6.34541e-05		0.0633596	7.57249e-05
54672	2312	47123	Tennessee	Monroe County	-228.869	-518.509	-204.172	-462.462	62.5686	141.751	55.8168	126.428		6.31083e-05	6.31702e-05	6.30837e-05	6.31684e-05	6.31424e-05	6.32045e-05	6.31178e-05	6.32027e-05		0.0631497	4.4261e-05
54992	2632	47103	Tennessee	Lincoln County	-228.57	-518.398	-203.893	-462.331	62.487	141.72	55.7406	126.393		6.3026e-05	6.31566e-05	6.29975e-05	6.31505e-05	6.30601e-05	6.31909e-05	6.30315e-05	6.31848e-05		0.0630997	7.88122e-05
52400	40	1123	Alabama	Tallapoosa County	-228.7	-517.706	-203.975	-461.611	62.5226	141.532	55.7632	126.196		6.30618e-05	6.30724e-05	6.3023e-05	6.30522e-05	6.30961e-05	6.31067e-05	6.30572e-05	6.30866e-05		0.0630695	2.69012e-05
52480	120	31137	Nebraska	Phelps County	-228.928	-515.858	-204.166	-459.936	62.5842	141.025	55.8146	125.737		6.31247e-05	6.28472e-05	6.30817e-05	6.28234e-05	6.31582e-05	6.28807e-05	6.31152e-05	6.28569e-05		0.062986	0.000145496
52971	611	31161	Nebraska	Sheridan County	-228.908	-515.631	-204.144	-459.738	62.5784	140.962	55.8083	125.682		6.31191e-05	6.28195e-05	6.30749e-05	6.27963e-05	6.31524e-05	6.28527e-05	6.31082e-05	6.28296e-05		0.0629691	0.000156686
53069	709	48117	Texas	Deaf Smith County	-228.149	-516.84	-203.641	-461.016	62.3711	141.293	55.6712	126.032		6.29097e-05	6.29668e-05	6.29195e-05	6.29709e-05	6.29432e-05	6.30005e-05	6.29531e-05	6.30046e-05		0.0629585	3.4379e-05
53382	1022	37107	North Carolina	Lenoir County	-228.014	-516.703	-203.407	-460.885	62.335	141.257	55.6078	125.998		6.28726e-05	6.29501e-05	6.28473e-05	6.29531e-05	6.29067e-05	6.29844e-05	6.28814e-05	6.29874e-05		0.0629229	5.3201e-05
53765	1405	13095	Georgia	Dougherty County	-227.273	-515.506	-202.847	-459.801	62.1322	140.93	55.4547	125.701		6.26681e-05	6.28043e-05	6.26743e-05	6.2805e-05	6.27021e-05	6.28385e-05	6.27082e-05	6.28392e-05		0.062755	7.37225e-05
53863	1503	18149	Indiana	Starke County	-227.603	-514.509	-203.021	-458.814	62.2224	140.657	55.5022	125.431		6.27593e-05	6.26829e-05	6.27282e-05	6.26701e-05	6.27931e-05	6.27168e-05	6.2762e-05	6.2704e-05		0.0627271	4.21764e-05
54413	2053	38053	North Dakota	McKenzie County	-227.303	-514.434	-202.9	-459.023	62.1395	140.635	55.4685	125.487		6.26764e-05	6.26738e-05	6.26908e-05	6.26987e-05	6.27095e-05	6.2707e-05	6.27239e-05	6.27319e-05		0.0627015	2.085e-05
54607	2247	37037	North Carolina	Chatham County	-227.408	-512.848	-202.839	-457.306	62.1692	140.203	55.4524	125.019		6.27055e-05	6.24805e-05	6.26718e-05	6.24642e-05	6.27395e-05	6.25145e-05	6.27057e-05	6.24982e-05		0.0625975	0.000117869
54728	2368	47029	Tennessee	Cocke County	-225.918	-513.887	-201.482	-458.228	61.7618	140.487	55.0815	125.271		6.22946e-05	6.2607e-05	6.22526e-05	6.25901e-05	6.23283e-05	6.2641e-05	6.22863e-05	6.26241e-05		0.062453	0.000175542
54804	2444	39027	Ohio	Clinton County	-225.789	-511.909	-201.479	-456.724	61.7264	139.946	55.0806	124.86		6.2259e-05	6.2366e-05	6.22517e-05	6.23847e-05	6.22926e-05	6.23998e-05	6.22852e-05	6.24184e-05		0.0623322	6.71051e-05
54497	2137	19147	Iowa	Palo Alto County	-226.315	-510.87	-201.835	-455.525	61.8697	139.661	55.1775	124.531		6.2404e-05	6.22395e-05	6.23616e-05	6.22208e-05	6.24372e-05	6.22728e-05	6.23948e-05	6.22541e-05		0.0623231	8.52944e-05
53679	1319	48241	Texas	Jasper County	-225.652	-510.204	-201.299	-455.012	61.6892	139.48	55.0315	124.392		6.22214e-05	6.21584e-05	6.21961e-05	6.21508e-05	6.2255e-05	6.21921e-05	6.22297e-05	6.21845e-05		0.0621985	3.54919e-05
54135	1775	19055	Iowa	Delaware County	-225.474	-508.629	-201.169	-453.663	61.64	139.049	54.9955	124.022		6.21721e-05	6.19664e-05	6.21557e-05	6.19666e-05	6.22054e-05	6.19997e-05	6.2189e-05	6.19999e-05		0.0620819	0.00010718
53766	1406	21177	Kentucky	Muhlenberg County	-225.007	-509.669	-200.738	-454.601	61.5127	139.334	54.8779	124.279		6.20434e-05	6.20932e-05	6.20226e-05	6.20947e-05	6.20769e-05	6.21269e-05	6.2056e-05	6.21283e-05		0.0620803	3.80686e-05
53265	905	48025	Texas	Bee County	-224.171	-509.898	-200.102	-454.846	61.284	139.396	54.7041	124.346		6.18128e-05	6.2121e-05	6.18261e-05	6.21281e-05	6.18461e-05	6.21547e-05	6.18595e-05	6.21617e-05		0.0619888	0.000164239
54608	2248	18181	Indiana	White County	-224.85	-508.163	-200.577	-453.211	61.4697	138.922	54.8339	123.899		6.20001e-05	6.19097e-05	6.19729e-05	6.19048e-05	6.20335e-05	6.19432e-05	6.20063e-05	6.19383e-05		0.0619636	4.71218e-05
52401	41	36023	New York	Cortland County	-224.567	-507.949	-200.363	-453.088	61.3926	138.864	54.7755	123.866		6.19222e-05	6.18836e-05	6.19068e-05	6.1888e-05	6.19557e-05	6.19172e-05	6.19402e-05	6.19216e-05		0.0619169	2.43342e-05
52481	121	55013	Wisconsin	Burnett County	-224.528	-505.949	-200.199	-451.039	61.3813	138.316	54.7303	123.305		6.19112e-05	6.164e-05	6.1856e-05	6.16081e-05	6.19443e-05	6.16731e-05	6.18891e-05	6.16412e-05		0.0617704	0.00014191
52686	326	42031	Pennsylvania	Clarion County	-223.541	-505.29	-199.392	-450.61	61.112	138.137	54.51	123.188		6.16392e-05	6.15597e-05	6.16068e-05	6.15495e-05	6.16726e-05	6.15931e-05	6.16401e-05	6.15829e-05		0.0616055	4.26298e-05
52805	445	39021	Ohio	Champaign County	-222.822	-504.36	-198.796	-449.906	60.9154	137.882	54.3472	122.996		6.1441e-05	6.14464e-05	6.14228e-05	6.14533e-05	6.14741e-05	6.14797e-05	6.14559e-05	6.14866e-05		0.0614575	2.14957e-05
52972	612	45057	South Carolina	Lancaster County	-222.956	-503.494	-198.934	-449.075	60.952	137.646	54.3849	122.769		6.14777e-05	6.13408e-05	6.14653e-05	6.13399e-05	6.1511e-05	6.13742e-05	6.14986e-05	6.13732e-05		0.0614226	7.24828e-05
53170	810	27075	Minnesota	Lake County	-223.032	-502.531	-198.847	-447.966	60.9725	137.382	54.3606	122.465		6.14989e-05	6.12235e-05	6.14383e-05	6.11883e-05	6.15318e-05	6.12564e-05	6.14711e-05	6.12212e-05		0.0613537	0.000143955
53383	1023	45059	South Carolina	Laurens County	-222.249	-503.25	-198.247	-448.749	60.7588	137.579	54.197	122.68		6.12829e-05	6.13112e-05	6.12529e-05	6.12953e-05	6.13161e-05	6.13445e-05	6.12861e-05	6.13286e-05		0.0613022	2.8965e-05
53767	1407	18023	Indiana	Clinton County	-222.352	-502.703	-198.383	-448.363	60.7867	137.429	54.2342	122.574		6.13112e-05	6.12445e-05	6.12951e-05	6.12427e-05	6.13443e-05	6.12776e-05	6.13281e-05	6.12758e-05		0.0612899	3.69078e-05
54269	1909	17051	Illinois	Fayette County	-221.77	-501.608	-197.86	-447.404	60.6275	137.13	54.0912	122.312		6.11507e-05	6.11111e-05	6.11335e-05	6.11116e-05	6.11836e-05	6.11442e-05	6.11664e-05	6.11446e-05		0.0611432	2.49344e-05
54673	2313	48059	Texas	Callahan County	-221.85	-501.197	-197.908	-446.951	60.6496	137.018	54.1041	122.188		6.1173e-05	6.1061e-05	6.11481e-05	6.10497e-05	6.12059e-05	6.1094e-05	6.1181e-05	6.10827e-05		0.0611244	5.98119e-05
54993	2633	1039	Alabama	Covington County	-221.587	-501.35	-197.617	-447.002	60.578	137.06	54.0249	122.202		6.11004e-05	6.10797e-05	6.10583e-05	6.10567e-05	6.11336e-05	6.1113e-05	6.10915e-05	6.109e-05		0.0610904	2.60615e-05
55198	2838	47071	Tennessee	Hardin County	-221.365	-501.181	-197.441	-446.942	60.517	137.013	53.9766	122.186		6.10391e-05	6.1059e-05	6.10039e-05	6.10486e-05	6.10721e-05	6.10922e-05	6.10368e-05	6.10817e-05		0.0610542	2.8378e-05
53601	1241	19031	Iowa	Cedar County	-221.036	-498.646	-197.22	-444.773	60.4268	136.32	53.9161	121.592		6.09484e-05	6.07502e-05	6.09358e-05	6.07523e-05	6.0981e-05	6.07829e-05	6.09685e-05	6.0785e-05		0.060863	0.000103597
53768	1408	45043	South Carolina	Georgetown County	-220.594	-499.379	-196.752	-445.321	60.3065	136.521	53.7884	121.743		6.08267e-05	6.08395e-05	6.07911e-05	6.08271e-05	6.08597e-05	6.08726e-05	6.0824e-05	6.08603e-05		0.0608376	2.62191e-05
54609	2249	29119	Missouri	McDonald County	-220.41	-499.364	-196.66	-445.391	60.2556	136.516	53.7629	121.761		6.07757e-05	6.08377e-05	6.07626e-05	6.08367e-05	6.08083e-05	6.08705e-05	6.07952e-05	6.08694e-05		0.0608195	4.06778e-05
52906	546	46051	South Dakota	Grant County	-220.88	-498.35	-197.029	-444.445	60.3839	136.238	53.8636	121.502		6.09054e-05	6.07142e-05	6.08767e-05	6.07074e-05	6.09378e-05	6.07466e-05	6.0909e-05	6.07398e-05		0.0608171	9.85112e-05
53602	1242	30035	Montana	Glacier County	-220.092	-498.873	-196.379	-444.889	60.1685	136.382	53.6859	121.623		6.0688e-05	6.07779e-05	6.06758e-05	6.07681e-05	6.07203e-05	6.08104e-05	6.07082e-05	6.08006e-05		0.0607437	5.20418e-05
54270	1910	42087	Pennsylvania	Mifflin County	-219.864	-498.634	-196.1	-444.741	60.1069	136.317	53.6102	121.584		6.06254e-05	6.07487e-05	6.05898e-05	6.07478e-05	6.06582e-05	6.07817e-05	6.06226e-05	6.07808e-05		0.0606944	7.84487e-05
52687	327	5123	Arkansas	St. Francis County	-219.689	-497.147	-195.996	-443.346	60.0588	135.911	53.5816	121.203		6.0577e-05	6.05676e-05	6.05575e-05	6.05574e-05	6.06096e-05	6.06004e-05	6.05902e-05	6.05902e-05		0.0605812	1.95384e-05
54994	2634	47055	Tennessee	Giles County	-219.024	-497.626	-195.365	-443.78	59.8772	136.042	53.4092	121.321		6.03937e-05	6.06259e-05	6.03625e-05	6.06166e-05	6.04264e-05	6.06589e-05	6.03952e-05	6.06495e-05		0.0605161	0.000131781
53384	1024	34033	New Jersey	Salem County	-218.721	-494.697	-195.071	-441.12	59.7944	135.241	53.329	120.594		6.03102e-05	6.02691e-05	6.02719e-05	6.02532e-05	6.03429e-05	6.03019e-05	6.03045e-05	6.0286e-05		0.0602925	2.8379e-05
53385	1025	13097	Georgia	Douglas County	-218.507	-493.235	-195.085	-440.031	59.7358	134.841	53.3326	120.296		6.02511e-05	6.0091e-05	6.0276e-05	6.01046e-05	6.02837e-05	6.01237e-05	6.03086e-05	6.01372e-05		0.060197	9.0901e-05
52688	328	37013	North Carolina	Beaufort County	-218.382	-493.306	-194.754	-439.852	59.7017	134.861	53.2423	120.248		6.02166e-05	6.00996e-05	6.01739e-05	6.00801e-05	6.02493e-05	6.01324e-05	6.02065e-05	6.01128e-05		0.0601589	6.15988e-05
53948	1588	28073	Mississippi	Lamar County	-217.45	-494.13	-194.163	-440.854	59.447	135.086	53.0807	120.521		5.99597e-05	6.02001e-05	5.99912e-05	6.02169e-05	5.99922e-05	6.02329e-05	6.00237e-05	6.02497e-05		0.0601083	0.000126572
52907	547	31081	Nebraska	Hamilton County	-217.996	-491.425	-194.446	-438.2	59.5955	134.345	53.1574	119.795		6.01102e-05	5.98705e-05	6.00785e-05	5.98544e-05	6.01422e-05	5.99025e-05	6.01105e-05	5.98864e-05		0.0599944	0.000125841
53386	1026	51199	Virginia	York County	-217.469	-491.763	-194.103	-438.711	59.452	134.439	53.0642	119.936		5.99648e-05	5.99117e-05	5.99727e-05	5.99242e-05	5.99973e-05	5.99443e-05	6.00052e-05	5.99569e-05		0.0599596	3.26833e-05
53864	1504	29073	Missouri	Gasconade County	-217.471	-491.769	-193.944	-438.538	59.4525	134.44	53.0206	119.888		5.99656e-05	5.99124e-05	5.99236e-05	5.99005e-05	5.99978e-05	5.99447e-05	5.99558e-05	5.99328e-05		0.0599417	3.1343e-05
54179	1819	29229	Missouri	Wright County	-217.291	-491.629	-193.822	-438.413	59.4032	134.402	52.9873	119.854		5.99159e-05	5.98954e-05	5.98859e-05	5.98835e-05	5.99481e-05	5.99277e-05	5.99181e-05	5.99158e-05		0.0599113	2.19707e-05
54805	2445	39097	Ohio	Madison County	-216.916	-491.088	-193.566	-438.107	59.3008	134.254	52.9174	119.77		5.98125e-05	5.98294e-05	5.98068e-05	5.98418e-05	5.98447e-05	5.98618e-05	5.98391e-05	5.98742e-05		0.0598388	2.27652e-05
55272	2912	28085	Mississippi	Lincoln County	-217.06	-490.722	-193.659	-437.619	59.3403	134.155	52.9428	119.637		5.98522e-05	5.97849e-05	5.98354e-05	5.97751e-05	5.98846e-05	5.98174e-05	5.98678e-05	5.98076e-05		0.0598281	3.89296e-05
55311	2951	27113	Minnesota	Pennington County	-217.314	-489.814	-193.854	-436.767	59.4092	133.905	52.9956	119.403		5.99223e-05	5.96742e-05	5.98956e-05	5.96587e-05	5.99541e-05	5.97061e-05	5.99275e-05	5.96905e-05		0.0598036	0.000131252
54674	2314	1093	Alabama	Marion County	-216.666	-491.272	-193.237	-438.033	59.2326	134.305	52.8275	119.75		5.97435e-05	5.98519e-05	5.97051e-05	5.98317e-05	5.97759e-05	5.98844e-05	5.97374e-05	5.98642e-05		0.0597993	6.72306e-05
52689	329	36121	New York	Wyoming County	-217.029	-489.609	-193.641	-436.696	59.3317	133.85	52.9379	119.384		5.98435e-05	5.96492e-05	5.98299e-05	5.96489e-05	5.98759e-05	5.96816e-05	5.98623e-05	5.96813e-05		0.0597591	0.000101907
52806	446	21089	Kentucky	Greenup County	-216.688	-490.352	-193.292	-437.345	59.2385	134.053	52.8425	119.562		5.97496e-05	5.97398e-05	5.97222e-05	5.97376e-05	5.97818e-05	5.97722e-05	5.97544e-05	5.977e-05		0.0597534	2.02158e-05
53949	1589	17149	Illinois	Pike County	-216.763	-489.322	-193.35	-436.394	59.2588	133.771	52.8582	119.301		5.97703e-05	5.96143e-05	5.97401e-05	5.96077e-05	5.98024e-05	5.96464e-05	5.97721e-05	5.96398e-05		0.0596991	7.98021e-05
54995	2635	48415	Texas	Scurry County	-216.281	-489.635	-192.998	-436.694	59.127	133.857	52.762	119.383		5.96374e-05	5.96524e-05	5.96314e-05	5.96487e-05	5.96693e-05	5.96845e-05	5.96633e-05	5.96808e-05		0.0596585	1.9394e-05
54414	2054	51095	Virginia	James City County	-216.287	-488.95	-192.997	-436.2	59.1288	133.67	52.7619	119.249		5.96388e-05	5.95689e-05	5.9631e-05	5.95813e-05	5.96712e-05	5.96014e-05	5.96633e-05	5.96137e-05		0.0596212	3.67463e-05
52402	42	20159	Kansas	Rice County	-216.111	-488.228	-192.726	-435.256	59.0802	133.471	52.6873	118.99		5.95903e-05	5.9481e-05	5.95471e-05	5.94523e-05	5.96221e-05	5.95129e-05	5.95789e-05	5.94841e-05		0.0595336	6.04167e-05
54996	2636	48473	Texas	Waller County	-215.314	-489.24	-192.155	-436.366	58.8629	133.749	52.5316	119.294		5.93707e-05	5.96043e-05	5.93708e-05	5.96039e-05	5.94028e-05	5.96366e-05	5.94028e-05	5.96362e-05		0.0595035	0.000125969
52482	122	40091	Oklahoma	McIntosh County	-215.66	-487.058	-192.33	-434.302	58.9573	133.152	52.5794	118.73		5.94662e-05	5.93385e-05	5.9425e-05	5.9322e-05	5.94981e-05	5.93705e-05	5.94569e-05	5.9354e-05		0.0594039	6.60986e-05
52612	252	17125	Illinois	Mason County	-215.469	-486.429	-192.155	-433.755	58.9051	132.98	52.5315	118.58		5.94135e-05	5.92619e-05	5.93709e-05	5.92473e-05	5.94454e-05	5.92938e-05	5.94028e-05	5.92792e-05		0.0593393	7.74025e-05
52807	447	31139	Nebraska	Pierce County	-215.42	-485.178	-192.137	-432.598	58.8912	132.637	52.5262	118.263		5.93998e-05	5.91094e-05	5.93652e-05	5.90892e-05	5.94314e-05	5.9141e-05	5.93968e-05	5.91208e-05		0.0592567	0.00015305
52908	548	48093	Texas	Comanche County	-214.921	-485.217	-191.732	-432.696	58.7553	132.649	52.4157	118.291		5.92624e-05	5.91141e-05	5.92399e-05	5.91026e-05	5.92943e-05	5.91461e-05	5.92718e-05	5.91346e-05		0.0591957	7.87631e-05
53266	906	27063	Minnesota	Jackson County	-215.012	-484.79	-191.754	-432.242	58.7799	132.531	52.4216	118.166		5.92875e-05	5.90621e-05	5.9247e-05	5.90407e-05	5.9319e-05	5.90937e-05	5.92785e-05	5.90722e-05		0.0591751	0.000117857
53387	1027	18021	Indiana	Clay County	-214.602	-485.452	-191.458	-432.963	58.6682	132.713	52.3409	118.364		5.91744e-05	5.91428e-05	5.91553e-05	5.91392e-05	5.92063e-05	5.91748e-05	5.91872e-05	5.91712e-05		0.0591689	2.25284e-05
53510	1150	1031	Alabama	Coffee County	-213.726	-483.386	-190.701	-431.107	58.4288	132.149	52.1344	117.857		5.89327e-05	5.88911e-05	5.89217e-05	5.88856e-05	5.89647e-05	5.89232e-05	5.89537e-05	5.89177e-05		0.0589238	2.7306e-05
53680	1320	18001	Indiana	Adams County	-213.721	-483.206	-190.727	-431.046	58.4273	132.099	52.1411	117.84		5.89314e-05	5.88691e-05	5.89295e-05	5.88773e-05	5.89632e-05	5.8901e-05	5.89612e-05	5.89092e-05		0.0589177	3.51164e-05
53769	1409	5149	Arkansas	Yell County	-213.049	-482.697	-190.055	-430.45	58.2435	131.96	51.9573	117.677		5.8746e-05	5.88072e-05	5.87218e-05	5.87959e-05	5.87777e-05	5.8839e-05	5.87534e-05	5.88277e-05		0.0587836	4.12332e-05
53865	1505	27151	Minnesota	Swift County	-213.571	-481.579	-190.455	-429.362	58.3859	131.654	52.0664	117.379		5.88901e-05	5.8671e-05	5.88454e-05	5.86473e-05	5.89214e-05	5.87023e-05	5.88767e-05	5.86786e-05		0.0587791	0.000114386
53950	1590	42047	Pennsylvania	Elk County	-213.193	-481.906	-190.151	-429.828	58.2831	131.744	51.9837	117.507		5.87859e-05	5.87108e-05	5.87515e-05	5.87109e-05	5.88176e-05	5.87427e-05	5.87833e-05	5.87428e-05		0.0587557	3.75781e-05
54036	1676	29059	Missouri	Dallas County	-213.036	-481.855	-190.015	-429.668	58.24	131.73	51.9465	117.463		5.87426e-05	5.87046e-05	5.87097e-05	5.86891e-05	5.87742e-05	5.87362e-05	5.87412e-05	5.87207e-05		0.0587273	2.68141e-05
54082	1722	5113	Arkansas	Polk County	-212.877	-481.5	-189.875	-429.369	58.1965	131.633	51.9082	117.381		5.86987e-05	5.86614e-05	5.86663e-05	5.86482e-05	5.87303e-05	5.86931e-05	5.86979e-05	5.86799e-05		0.0586845	2.60781e-05
54136	1776	38067	North Dakota	Pembina County	-212.661	-480.521	-189.708	-428.606	58.1371	131.364	51.8621	117.172		5.86392e-05	5.85421e-05	5.86146e-05	5.85439e-05	5.86703e-05	5.85734e-05	5.86458e-05	5.85751e-05		0.0586006	4.8718e-05
54271	1911	19091	Iowa	Humboldt County	-212.858	-480.135	-189.859	-428.159	58.191	131.259	51.9035	117.05		5.86935e-05	5.84951e-05	5.86613e-05	5.8483e-05	5.87247e-05	5.85264e-05	5.86926e-05	5.85143e-05		0.0585988	0.000102875
54498	2138	35037	New Mexico	Quay County	-212.306	-480.537	-189.316	-428.434	58.04	131.369	51.7551	117.125		5.85413e-05	5.85441e-05	5.84937e-05	5.85205e-05	5.85724e-05	5.85753e-05	5.85248e-05	5.85517e-05		0.0585405	2.72546e-05
54555	2195	20087	Kansas	Jefferson County	-212.625	-479.59	-189.679	-427.661	58.1273	131.11	51.8543	116.914		5.86291e-05	5.84286e-05	5.86057e-05	5.84149e-05	5.86604e-05	5.84599e-05	5.86369e-05	5.84462e-05		0.0585352	0.000106399
54729	2369	51013	Virginia	Arlington County	-212.794	-478.339	-190.241	-427.088	58.1741	130.769	52.0083	116.758		5.86759e-05	5.82763e-05	5.87792e-05	5.83366e-05	5.87077e-05	5.83079e-05	5.88111e-05	5.83684e-05		0.0585329	0.000230248
54806	2446	33003	New Hampshire	Carroll County	-211.763	-478.878	-188.856	-427.083	57.8922	130.917	51.6299	116.757		5.83916e-05	5.83419e-05	5.83516e-05	5.8336e-05	5.84232e-05	5.83736e-05	5.83832e-05	5.83677e-05		0.0583711	2.87101e-05
55273	2913	28001	Mississippi	Adams County	-211.598	-478.78	-188.76	-426.942	57.847	130.89	51.6036	116.718		5.8346e-05	5.83299e-05	5.83219e-05	5.83167e-05	5.83776e-05	5.83617e-05	5.83535e-05	5.83484e-05		0.0583445	2.06524e-05
55312	2952	42103	Pennsylvania	Pike County	-211.41	-477.782	-188.623	-426.076	57.7956	130.617	51.5661	116.481		5.82942e-05	5.82084e-05	5.82795e-05	5.81984e-05	5.83257e-05	5.82401e-05	5.8311e-05	5.823e-05		0.0582609	4.81411e-05
55380	3020	38049	North Dakota	McHenry County	-211.485	-477.618	-188.647	-425.991	57.8154	130.57	51.572	116.457		5.83148e-05	5.81884e-05	5.82868e-05	5.81868e-05	5.83457e-05	5.82193e-05	5.83177e-05	5.82177e-05		0.0582597	6.36015e-05
55429	3069	21085	Kentucky	Grayson County	-210.832	-477.486	-188.101	-425.903	57.6374	130.536	51.4233	116.434		5.81347e-05	5.81723e-05	5.81182e-05	5.81747e-05	5.81661e-05	5.82039e-05	5.81496e-05	5.82063e-05		0.0581657	3.0947e-05
53469	1109	21021	Kentucky	Boyle County	-210.336	-476.841	-187.625	-425.279	57.5019	130.359	51.2933	116.263		5.7998e-05	5.80937e-05	5.79712e-05	5.80896e-05	5.80293e-05	5.81252e-05	5.80025e-05	5.81211e-05		0.0580538	6.05562e-05
53171	811	37047	North Carolina	Columbus County	-209.823	-477.362	-187.153	-425.697	57.3618	130.502	51.1643	116.378		5.78565e-05	5.81572e-05	5.78253e-05	5.81466e-05	5.78879e-05	5.81889e-05	5.78566e-05	5.81783e-05		0.0580122	0.000167656
53267	907	54051	West Virginia	Marshall County	-210.28	-475.728	-187.578	-424.314	57.4865	130.055	51.2802	116		5.79825e-05	5.79581e-05	5.79565e-05	5.79577e-05	5.80138e-05	5.79896e-05	5.79878e-05	5.79892e-05		0.0579794	2.03938e-05
53866	1506	30073	Montana	Pondera County	-210.42	-475.334	-187.657	-423.81	57.5244	129.946	51.3016	115.861		5.80212e-05	5.79102e-05	5.79811e-05	5.78888e-05	5.8052e-05	5.7941e-05	5.80119e-05	5.79197e-05		0.0579658	5.93152e-05
54556	2196	39137	Ohio	Putnam County	-210.372	-474.825	-187.718	-423.499	57.5117	129.808	51.3185	115.777		5.80079e-05	5.78481e-05	5.79998e-05	5.78464e-05	5.80392e-05	5.78795e-05	5.80311e-05	5.78778e-05		0.0579412	8.54007e-05
54997	2637	39161	Ohio	Van Wert County	-210.351	-474.534	-187.62	-423.108	57.5061	129.729	51.2918	115.67		5.80023e-05	5.78127e-05	5.79696e-05	5.7793e-05	5.80335e-05	5.7844e-05	5.80008e-05	5.78243e-05		0.05791	0.000100299
52641	281	45047	South Carolina	Greenwood County	-209.985	-474.412	-187.329	-423.067	57.406	129.696	51.2123	115.659		5.79011e-05	5.77978e-05	5.78797e-05	5.77874e-05	5.79325e-05	5.78293e-05	5.7911e-05	5.78188e-05		0.0578572	5.56225e-05
52483	123	48015	Texas	Austin County	-209.787	-474.083	-187.14	-422.76	57.3519	129.605	51.1606	115.574		5.78467e-05	5.77578e-05	5.78214e-05	5.77454e-05	5.78779e-05	5.77891e-05	5.78525e-05	5.77767e-05		0.0578084	4.83034e-05
54998	2638	42035	Pennsylvania	Clinton County	-209.108	-475.447	-186.527	-423.992	57.1662	129.979	50.9931	115.912		5.76593e-05	5.7924e-05	5.76319e-05	5.79137e-05	5.76905e-05	5.79554e-05	5.76631e-05	5.79452e-05		0.0577979	0.000147505
52973	613	20149	Kansas	Pottawatomie County	-209.795	-473.502	-187.237	-422.305	57.3537	129.446	51.1867	115.449		5.7849e-05	5.7687e-05	5.78513e-05	5.76833e-05	5.78798e-05	5.77178e-05	5.78821e-05	5.77141e-05		0.057783	8.97302e-05
53388	1028	47077	Tennessee	Henderson County	-208.454	-474.867	-185.959	-423.502	56.9875	129.82	50.8376	115.777		5.74791e-05	5.78532e-05	5.74562e-05	5.78468e-05	5.75102e-05	5.78846e-05	5.74873e-05	5.78782e-05		0.0576744	0.000205311
53603	1243	46009	South Dakota	Bon Homme County	-209.247	-472.663	-186.72	-421.67	57.2037	129.216	51.0455	115.276		5.76977e-05	5.75847e-05	5.76917e-05	5.75966e-05	5.77284e-05	5.76155e-05	5.77223e-05	5.76273e-05		0.057658	5.819e-05
53867	1507	27173	Minnesota	Yellow Medicine County	-209.406	-471.995	-186.77	-420.851	57.2473	129.034	51.059	115.052		5.77417e-05	5.75034e-05	5.7707e-05	5.74847e-05	5.77724e-05	5.75341e-05	5.77377e-05	5.75154e-05		0.0576245	0.000125065
54180	1820	29053	Missouri	Cooper County	-208.952	-472.715	-186.403	-421.574	57.1233	129.231	50.9589	115.25		5.76163e-05	5.7591e-05	5.75935e-05	5.75834e-05	5.76472e-05	5.7622e-05	5.76244e-05	5.76144e-05		0.0576115	2.10914e-05
53470	1110	21235	Kentucky	Whitley County	-207.505	-471.78	-185.113	-420.764	56.7279	128.976	50.6063	115.029		5.72173e-05	5.74772e-05	5.71948e-05	5.74728e-05	5.72482e-05	5.75083e-05	5.72257e-05	5.75039e-05		0.057356	0.000145033
54999	2639	47025	Tennessee	Claiborne County	-207.306	-471.645	-184.907	-420.602	56.6735	128.939	50.5501	114.985		5.71625e-05	5.74607e-05	5.71313e-05	5.74507e-05	5.71933e-05	5.74919e-05	5.71622e-05	5.74819e-05		0.0573168	0.000166466
52484	124	31027	Nebraska	Cedar County	-208.207	-469.382	-185.72	-418.558	56.9194	128.319	50.7719	114.425		5.7411e-05	5.7185e-05	5.73825e-05	5.71716e-05	5.74415e-05	5.72154e-05	5.74129e-05	5.7202e-05		0.0573027	0.000118531
52613	253	22031	Louisiana	De Soto Parish	-207.532	-470.457	-185.149	-419.541	56.7354	128.614	50.6163	114.695		5.72249e-05	5.7316e-05	5.72062e-05	5.73058e-05	5.72558e-05	5.73471e-05	5.72371e-05	5.73368e-05		0.0572787	5.42409e-05
52974	614	48487	Texas	Wilbarger County	-207.762	-469.836	-185.295	-418.896	56.7981	128.444	50.656	114.518		5.72883e-05	5.72404e-05	5.72512e-05	5.72177e-05	5.7319e-05	5.72712e-05	5.72819e-05	5.72485e-05		0.0572648	3.18235e-05
53268	908	48071	Texas	Chambers County	-207.408	-469.707	-185.173	-419.05	56.7016	128.409	50.6228	114.56		5.71908e-05	5.72246e-05	5.72135e-05	5.72387e-05	5.72217e-05	5.72557e-05	5.72444e-05	5.72698e-05		0.0572324	2.50265e-05
53389	1029	5089	Arkansas	Marion County	-207.251	-469.009	-184.876	-418.323	56.6584	128.218	50.5416	114.361		5.71474e-05	5.71395e-05	5.71219e-05	5.71394e-05	5.71781e-05	5.71704e-05	5.71526e-05	5.71703e-05		0.0571524	1.92577e-05
54037	1677	13127	Georgia	Glynn County	-207.105	-468.851	-184.767	-418.122	56.6188	128.176	50.5121	114.307		5.71071e-05	5.71203e-05	5.70882e-05	5.7112e-05	5.71381e-05	5.71515e-05	5.71192e-05	5.71432e-05		0.0571224	2.08764e-05
54340	1980	39159	Ohio	Union County	-207.181	-468.315	-184.965	-417.819	56.6395	128.029	50.5659	114.224		5.71282e-05	5.7055e-05	5.71492e-05	5.70706e-05	5.7159e-05	5.70859e-05	5.718e-05	5.71015e-05		0.0571162	4.48622e-05
54415	2055	27143	Minnesota	Sibley County	-207.445	-467.414	-185.056	-416.802	56.7112	127.781	50.5906	113.945		5.72009e-05	5.69453e-05	5.71775e-05	5.69316e-05	5.72314e-05	5.69757e-05	5.7208e-05	5.6962e-05		0.057079	0.00013542
54499	2139	39031	Ohio	Coshocton County	-206.959	-468.181	-184.64	-417.642	56.5787	127.992	50.477	114.175		5.70669e-05	5.70387e-05	5.70487e-05	5.70463e-05	5.70977e-05	5.70696e-05	5.70795e-05	5.70772e-05		0.0570656	1.98388e-05
55313	2953	26141	Michigan	Presque Isle County	-206.95	-466.918	-184.522	-416.296	56.5761	127.646	50.4447	113.807		5.70643e-05	5.68849e-05	5.70124e-05	5.68625e-05	5.7095e-05	5.69155e-05	5.7043e-05	5.68932e-05		0.0569714	9.20489e-05
52808	448	30089	Montana	Sanders County	-206.431	-466.632	-184.104	-416.116	56.434	127.568	50.3303	113.758		5.69211e-05	5.685e-05	5.68832e-05	5.6838e-05	5.69516e-05	5.68805e-05	5.69136e-05	5.68686e-05		0.0568883	3.81838e-05
52485	125	5071	Arkansas	Johnson County	-205.75	-467.873	-183.618	-417.341	56.248	127.907	50.1976	114.093		5.67334e-05	5.70011e-05	5.6733e-05	5.70053e-05	5.67639e-05	5.70319e-05	5.67635e-05	5.70361e-05		0.0568835	0.000145349
54416	2056	46041	South Dakota	Dewey County	-206.238	-465.866	-184.022	-415.458	56.3811	127.358	50.3076	113.577		5.68682e-05	5.67566e-05	5.68578e-05	5.67481e-05	5.68983e-05	5.67868e-05	5.68879e-05	5.67783e-05		0.0568227	6.14694e-05
54137	1777	17145	Illinois	Perry County	-206.044	-465.855	-183.83	-415.511	56.3285	127.356	50.2557	113.593		5.68146e-05	5.67553e-05	5.67987e-05	5.67553e-05	5.68452e-05	5.6786e-05	5.68293e-05	5.6786e-05		0.0567963	3.25051e-05
52536	176	24047	Maryland	Worcester County	-206.175	-465.503	-183.871	-415.057	56.3646	127.26	50.2669	113.469		5.68508e-05	5.67124e-05	5.68111e-05	5.66932e-05	5.68816e-05	5.67433e-05	5.68419e-05	5.67241e-05		0.0567823	7.23694e-05
54807	2447	33001	New Hampshire	Belknap County	-205.714	-465.402	-183.471	-415.045	56.2385	127.232	50.1576	113.466		5.67236e-05	5.67001e-05	5.66877e-05	5.66917e-05	5.67543e-05	5.67309e-05	5.67183e-05	5.67225e-05		0.0567161	2.21781e-05
55199	2839	20167	Kansas	Russell County	-206.042	-464.33	-183.73	-413.944	56.3277	126.938	50.228	113.164		5.68141e-05	5.65695e-05	5.67677e-05	5.65412e-05	5.68443e-05	5.65997e-05	5.67979e-05	5.65715e-05		0.0566882	0.000128576
53172	812	19037	Iowa	Chickasaw County	-205.632	-463.742	-183.401	-413.523	56.2156	126.778	50.1382	113.049		5.67009e-05	5.64979e-05	5.6666e-05	5.64838e-05	5.67312e-05	5.65282e-05	5.66963e-05	5.65141e-05		0.0566023	0.000105213
55200	2840	5141	Arkansas	Van Buren County	-205.098	-463.999	-182.92	-413.764	56.07	126.848	50.0069	113.115		5.65538e-05	5.65292e-05	5.65175e-05	5.65167e-05	5.65843e-05	5.65598e-05	5.65479e-05	5.65473e-05		0.0565446	2.28509e-05
54038	1678	50003	Vermont	Bennington County	-205.031	-463.059	-182.841	-412.858	56.0518	126.592	49.9853	112.868		5.65353e-05	5.64146e-05	5.64929e-05	5.6393e-05	5.65659e-05	5.64453e-05	5.65235e-05	5.64236e-05		0.0564743	6.37599e-05
54500	2140	40035	Oklahoma	Craig County	-204.216	-461.589	-182.127	-411.563	55.8285	126.189	49.7899	112.513		5.63104e-05	5.62356e-05	5.62724e-05	5.6216e-05	5.63405e-05	5.62659e-05	5.63025e-05	5.62463e-05		0.0562737	4.18085e-05
55000	2640	47143	Tennessee	Rhea County	-202.773	-459.505	-180.871	-409.787	55.4343	125.62	49.4467	112.028		5.59125e-05	5.59817e-05	5.58842e-05	5.59734e-05	5.59428e-05	5.60122e-05	5.59144e-05	5.60038e-05		0.0559531	4.674e-05
52403	43	46115	South Dakota	Spink County	-202.744	-457.901	-180.876	-408.439	55.4259	125.18	49.4477	111.658		5.59047e-05	5.57863e-05	5.5886e-05	5.57894e-05	5.59343e-05	5.58159e-05	5.59155e-05	5.5819e-05		0.0558564	6.00327e-05
52809	449	37111	North Carolina	McDowell County	-202.461	-458.27	-180.587	-408.695	55.3492	125.283	49.3692	111.73		5.58267e-05	5.58313e-05	5.57966e-05	5.58243e-05	5.58569e-05	5.58616e-05	5.58268e-05	5.58546e-05		0.0558348	2.17473e-05
53770	1410	31003	Nebraska	Antelope County	-202.786	-456.908	-180.876	-407.428	55.4374	124.909	49.4477	111.382		5.59162e-05	5.56653e-05	5.58859e-05	5.56512e-05	5.59459e-05	5.5695e-05	5.59156e-05	5.56809e-05		0.0557945	0.000131358
55001	2641	38097	North Dakota	Traill County	-202.085	-457.932	-180.259	-408.405	55.2458	125.189	49.2789	111.649		5.57229e-05	5.579e-05	5.56951e-05	5.57846e-05	5.57525e-05	5.58198e-05	5.57247e-05	5.58144e-05		0.055763	4.60648e-05
53173	813	16079	Idaho	Shoshone County	-202.452	-456.885	-180.534	-407.362	55.3463	124.903	49.3543	111.365		5.5824e-05	5.56625e-05	5.57801e-05	5.56422e-05	5.58539e-05	5.56925e-05	5.581e-05	5.56721e-05		0.0557422	8.36055e-05
54417	2057	29013	Missouri	Bates County	-201.888	-457.105	-180.127	-407.762	55.1923	124.963	49.243	111.474		5.56687e-05	5.56893e-05	5.56543e-05	5.56968e-05	5.56985e-05	5.57193e-05	5.56841e-05	5.57268e-05		0.0556922	2.40474e-05
53604	1244	46037	South Dakota	Day County	-201.641	-454.983	-179.852	-405.763	55.1244	124.383	49.1676	110.927		5.56005e-05	5.54308e-05	5.55694e-05	5.54239e-05	5.563e-05	5.54603e-05	5.55989e-05	5.54534e-05		0.0555209	8.65603e-05
52810	450	37061	North Carolina	Duplin County	-201.201	-455.683	-179.499	-406.371	55.0047	124.575	49.0717	111.094		5.54791e-05	5.5516e-05	5.54603e-05	5.55068e-05	5.55092e-05	5.55462e-05	5.54904e-05	5.55371e-05		0.0555056	2.8658e-05
54138	1778	1053	Alabama	Escambia County	-201.07	-454.413	-179.36	-405.197	54.969	124.228	49.0338	110.774		5.54431e-05	5.53613e-05	5.54174e-05	5.53465e-05	5.54732e-05	5.53915e-05	5.54475e-05	5.53767e-05		0.0554071	4.52597e-05
55201	2841	29163	Missouri	Pike County	-200.75	-454.142	-179.11	-405.023	54.8812	124.154	48.9652	110.725		5.53549e-05	5.53283e-05	5.53403e-05	5.53227e-05	5.53846e-05	5.53581e-05	5.537e-05	5.53525e-05		0.0553514	2.06552e-05
54610	2250	20151	Kansas	Pratt County	-200.779	-453.604	-179.076	-404.431	54.8889	124.006	48.9556	110.563		5.53628e-05	5.52628e-05	5.53296e-05	5.52419e-05	5.53924e-05	5.52924e-05	5.53591e-05	5.52715e-05		0.055314	5.46595e-05
54611	2251	48225	Texas	Houston County	-200.856	-453.273	-179.133	-404.143	54.9102	123.916	48.9715	110.485		5.53839e-05	5.52225e-05	5.53472e-05	5.52025e-05	5.54138e-05	5.52524e-05	5.53771e-05	5.52324e-05		0.055304	8.48477e-05
54730	2370	48123	Texas	DeWitt County	-200.562	-453.136	-178.886	-404.068	54.83	123.879	48.904	110.464		5.53031e-05	5.52058e-05	5.5271e-05	5.51922e-05	5.53329e-05	5.52357e-05	5.53008e-05	5.52221e-05		0.055258	5.13724e-05
55002	2642	21211	Kentucky	Shelby County	-199.8	-453.832	-178.394	-405.023	54.6216	124.069	48.7695	110.726		5.50929e-05	5.52906e-05	5.51188e-05	5.53227e-05	5.51226e-05	5.53206e-05	5.51486e-05	5.53527e-05		0.0552212	0.000109678
53174	814	45055	South Carolina	Kershaw County	-199.981	-452.823	-178.417	-403.846	54.6712	123.794	48.7761	110.404		5.51428e-05	5.51676e-05	5.51262e-05	5.51619e-05	5.51727e-05	5.51977e-05	5.51561e-05	5.51919e-05		0.0551646	2.3749e-05
53269	909	21013	Kentucky	Bell County	-198.896	-454.919	-177.4	-405.681	54.3745	124.366	48.4979	110.906		5.48436e-05	5.54229e-05	5.48119e-05	5.54126e-05	5.48732e-05	5.5453e-05	5.48415e-05	5.54427e-05		0.0551377	0.000316168
53390	1030	19151	Iowa	Pocahontas County	-200.112	-451.244	-178.45	-402.337	54.7065	123.361	48.7844	109.991		5.51789e-05	5.49753e-05	5.51362e-05	5.49559e-05	5.52083e-05	5.50047e-05	5.51655e-05	5.49853e-05		0.0550763	0.000105306
53681	1321	16087	Idaho	Washington County	-199.834	-451.166	-178.213	-402.288	54.6304	123.339	48.7199	109.977		5.51021e-05	5.49657e-05	5.50632e-05	5.49492e-05	5.51314e-05	5.49951e-05	5.50925e-05	5.49786e-05		0.0550347	7.05453e-05
54083	1723	47109	Tennessee	McNairy County	-199.446	-451.916	-177.92	-403.051	54.5249	123.545	48.6401	110.187		5.49953e-05	5.50571e-05	5.49726e-05	5.50533e-05	5.5025e-05	5.50869e-05	5.50023e-05	5.50832e-05		0.0550345	4.22176e-05
53605	1245	19063	Iowa	Emmet County	-199.568	-450.779	-178.007	-401.981	54.5576	123.234	48.6633	109.893		5.50287e-05	5.49186e-05	5.49993e-05	5.49073e-05	5.5058e-05	5.49479e-05	5.50286e-05	5.49366e-05		0.0549781	5.74999e-05
53606	1246	1079	Alabama	Lawrence County	-199.097	-451.407	-177.622	-402.554	54.4296	123.406	48.5585	110.051		5.48991e-05	5.49951e-05	5.48803e-05	5.49856e-05	5.49288e-05	5.5025e-05	5.491e-05	5.50154e-05		0.0549549	5.67103e-05
52404	44	21141	Kentucky	Logan County	-198.697	-450.047	-177.289	-401.454	54.32	123.035	48.4676	109.75		5.47887e-05	5.48294e-05	5.47777e-05	5.48353e-05	5.48183e-05	5.48592e-05	5.48073e-05	5.4865e-05		0.0548226	3.10847e-05
52813	453	42059	Pennsylvania	Greene County	-198.29	-450.702	-176.897	-402.019	54.2088	123.214	48.3603	109.904		5.46764e-05	5.49092e-05	5.46564e-05	5.49123e-05	5.4706e-05	5.4939e-05	5.46859e-05	5.49421e-05		0.0548034	0.000131879
52978	618	51173	Virginia	Smyth County	-198.658	-449.983	-177.154	-401.188	54.3095	123.017	48.4305	109.677		5.47781e-05	5.48216e-05	5.47357e-05	5.47989e-05	5.48077e-05	5.48514e-05	5.47653e-05	5.48287e-05		0.0547984	3.73904e-05
53869	1509	26079	Michigan	Kalkaska County	-198.249	-447.646	-176.845	-399.19	54.1976	122.378	48.3459	109.131		5.46653e-05	5.45369e-05	5.46403e-05	5.45259e-05	5.46947e-05	5.45664e-05	5.46697e-05	5.45554e-05		0.0546068	6.75189e-05
54273	1913	28133	Mississippi	Sunflower County	-197.373	-447.813	-176.093	-399.319	53.9582	122.424	48.1405	109.167		5.44237e-05	5.45572e-05	5.44079e-05	5.45437e-05	5.44531e-05	5.45869e-05	5.44373e-05	5.45733e-05		0.0544979	7.41567e-05
54810	2450	42061	Pennsylvania	Huntingdon County	-197.338	-446.591	-176.046	-398.343	53.9485	122.09	48.1279	108.9		5.44139e-05	5.44084e-05	5.43936e-05	5.44103e-05	5.44433e-05	5.44379e-05	5.44231e-05	5.44399e-05		0.0544213	1.78036e-05
52979	619	5135	Arkansas	Sharp County	-197.35	-446.48	-176.012	-398.138	53.9518	122.059	48.1182	108.843		5.44174e-05	5.43948e-05	5.43829e-05	5.43823e-05	5.44467e-05	5.44242e-05	5.44122e-05	5.44117e-05		0.054409	2.18131e-05
52537	177	5029	Arkansas	Conway County	-197.133	-446.487	-175.864	-398.188	53.8924	122.061	48.0778	108.857		5.43574e-05	5.43958e-05	5.43372e-05	5.43891e-05	5.43867e-05	5.44252e-05	5.43665e-05	5.44185e-05		0.0543845	2.98954e-05
52405	45	27065	Minnesota	Kanabec County	-197.506	-445.174	-176.206	-397.01	53.9941	121.701	48.1712	108.534		5.44603e-05	5.42357e-05	5.4443e-05	5.42283e-05	5.44894e-05	5.42648e-05	5.44721e-05	5.42573e-05		0.0543564	0.000118666
52486	126	49031	Utah	Piute County	-197.289	-444.845	-175.964	-396.609	53.9311	121.603	48.1016	108.417		5.44004e-05	5.41956e-05	5.43681e-05	5.41734e-05	5.44257e-05	5.42209e-05	5.43934e-05	5.41987e-05		0.054297	0.00010865
52690	330	48145	Texas	Falls County	-196.845	-445.004	-175.565	-396.769	53.8137	121.656	47.9962	108.469		5.42781e-05	5.4215e-05	5.4245e-05	5.41953e-05	5.43073e-05	5.42444e-05	5.42742e-05	5.42246e-05		0.054248	3.69131e-05
52814	454	30099	Montana	Teton County	-196.729	-444.806	-175.472	-396.678	53.7814	121.6	47.9702	108.443		5.42459e-05	5.41909e-05	5.42161e-05	5.41829e-05	5.42747e-05	5.42197e-05	5.42449e-05	5.42117e-05		0.0542234	3.04594e-05
52909	549	54083	West Virginia	Randolph County	-196.638	-444.886	-175.394	-396.773	53.7573	121.624	47.9495	108.47		5.4221e-05	5.42007e-05	5.41921e-05	5.41958e-05	5.42503e-05	5.42301e-05	5.42214e-05	5.42252e-05		0.0542171	1.9718e-05
52980	620	40073	Oklahoma	Kingfisher County	-196.697	-444.257	-175.499	-396.218	53.7732	121.451	47.978	108.318		5.42373e-05	5.4124e-05	5.42245e-05	5.41201e-05	5.42664e-05	5.41531e-05	5.42536e-05	5.41492e-05		0.054191	6.0439e-05
53070	710	26085	Michigan	Lake County	-196.638	-443.525	-175.315	-395.395	53.7571	121.251	47.9278	108.093		5.4221e-05	5.40349e-05	5.41677e-05	5.40076e-05	5.42502e-05	5.40641e-05	5.41969e-05	5.40368e-05		0.0541224	9.65212e-05
53175	815	21095	Kentucky	Harlan County	-195.454	-445.301	-174.313	-397.063	53.4334	121.737	47.654	108.55		5.38943e-05	5.42511e-05	5.38582e-05	5.42354e-05	5.39235e-05	5.42806e-05	5.38873e-05	5.42648e-05		0.0540744	0.000197448
53394	1034	21121	Kentucky	Knox County	-195.159	-445.182	-174.094	-397.03	53.3529	121.704	47.594	108.541		5.38132e-05	5.42367e-05	5.37904e-05	5.42309e-05	5.38423e-05	5.42661e-05	5.38194e-05	5.42603e-05		0.0540324	0.00023173
53771	1411	46105	South Dakota	Perkins County	-196.078	-442.373	-174.877	-394.517	53.6035	120.935	47.8076	107.852		5.40667e-05	5.38945e-05	5.40325e-05	5.38876e-05	5.40952e-05	5.39231e-05	5.4061e-05	5.39162e-05		0.0539846	8.70707e-05
53870	1510	51023	Virginia	Botetourt County	-195.83	-442.096	-174.682	-394.254	53.5362	120.861	47.7549	107.782		5.39981e-05	5.38607e-05	5.39721e-05	5.38518e-05	5.40273e-05	5.38899e-05	5.40013e-05	5.3881e-05		0.0539353	7.13787e-05
53952	1592	29115	Missouri	Linn County	-195.284	-441.09	-174.183	-393.34	53.3869	120.585	47.618	107.531		5.38477e-05	5.37381e-05	5.38178e-05	5.37269e-05	5.38765e-05	5.3767e-05	5.38466e-05	5.37557e-05		0.053797	5.70304e-05
54040	1680	27101	Minnesota	Murray County	-195.457	-440.431	-174.328	-392.725	53.4338	120.405	47.6577	107.363		5.38952e-05	5.36579e-05	5.38628e-05	5.3643e-05	5.39239e-05	5.36865e-05	5.38914e-05	5.36716e-05		0.053779	0.000123883
54181	1821	17045	Illinois	Edgar County	-195.246	-440.762	-174.15	-393.07	53.3765	120.496	47.6092	107.458		5.38371e-05	5.36982e-05	5.38076e-05	5.369e-05	5.38661e-05	5.37273e-05	5.38366e-05	5.37191e-05		0.0537728	7.12131e-05
54274	1914	20133	Kansas	Neosho County	-195.116	-440.359	-174.037	-392.633	53.3409	120.385	47.5781	107.338		5.38014e-05	5.36491e-05	5.37726e-05	5.36303e-05	5.38302e-05	5.36779e-05	5.38014e-05	5.36591e-05		0.0537278	8.12617e-05
54418	2058	48285	Texas	Lavaca County	-195.008	-440.245	-173.92	-392.548	53.3116	120.355	47.5466	107.315		5.37716e-05	5.36352e-05	5.37368e-05	5.36188e-05	5.38006e-05	5.36643e-05	5.37658e-05	5.36479e-05		0.0537051	7.12063e-05
54811	2451	20005	Kansas	Atchison County	-194.484	-440.446	-173.504	-392.742	53.168	120.409	47.4326	107.368		5.3627e-05	5.36597e-05	5.36082e-05	5.36453e-05	5.36556e-05	5.36884e-05	5.36368e-05	5.3674e-05		0.0536494	2.57583e-05
55006	2646	13285	Georgia	Troup County	-194.402	-439.956	-173.432	-392.328	53.1459	120.276	47.4131	107.255		5.36044e-05	5.36e-05	5.35858e-05	5.35887e-05	5.36334e-05	5.36291e-05	5.36148e-05	5.36179e-05		0.0536093	1.75885e-05
55202	2842	47069	Tennessee	Hardeman County	-194.096	-440.554	-173.171	-392.943	53.0621	120.439	47.3418	107.423		5.35199e-05	5.36729e-05	5.35053e-05	5.36727e-05	5.35488e-05	5.3702e-05	5.35342e-05	5.37019e-05		0.0536072	8.72448e-05
53471	1111	22089	Louisiana	St. Charles Parish	-193.412	-440.743	-172.7	-393.235	52.8753	120.491	47.2131	107.503		5.33314e-05	5.36959e-05	5.33597e-05	5.37126e-05	5.33603e-05	5.37252e-05	5.33887e-05	5.37419e-05		0.0535395	0.000192859
53395	1035	47185	Tennessee	White County	-194.106	-439.495	-173.132	-391.936	53.0649	120.15	47.3312	107.148		5.35227e-05	5.35438e-05	5.34933e-05	5.35352e-05	5.35517e-05	5.35729e-05	5.35222e-05	5.35643e-05		0.0535383	2.56781e-05
53176	816	33007	New Hampshire	Coos County	-194.115	-438.606	-173.093	-391.094	53.0675	119.907	47.3205	106.918		5.35253e-05	5.34356e-05	5.34812e-05	5.34201e-05	5.35543e-05	5.34646e-05	5.35101e-05	5.34491e-05		0.0534801	4.6645e-05
53683	1323	5107	Arkansas	Phillips County	-193.562	-439.16	-172.629	-391.55	52.9161	120.058	47.1936	107.043		5.33726e-05	5.3503e-05	5.33378e-05	5.34825e-05	5.34015e-05	5.35321e-05	5.33667e-05	5.35115e-05		0.0534385	7.67089e-05
54419	2059	37083	North Carolina	Halifax County	-193.23	-439.527	-172.382	-392.093	52.8256	120.159	47.1262	107.191		5.32812e-05	5.35478e-05	5.32616e-05	5.35567e-05	5.33101e-05	5.35769e-05	5.32905e-05	5.35858e-05		0.0534263	0.000151202
54504	2144	28083	Mississippi	Leflore County	-193.215	-437.342	-172.404	-390.018	52.8214	119.561	47.132	106.624		5.32771e-05	5.32816e-05	5.32681e-05	5.32732e-05	5.33059e-05	5.33105e-05	5.32969e-05	5.33021e-05		0.0532894	1.63347e-05
54557	2197	19073	Iowa	Greene County	-193.129	-435.639	-172.262	-388.497	52.7975	119.095	47.0929	106.207		5.32534e-05	5.3074e-05	5.32244e-05	5.30654e-05	5.32818e-05	5.31024e-05	5.32528e-05	5.30938e-05		0.0531685	9.24129e-05
52691	331	19131	Iowa	Mitchell County	-192.893	-435.091	-172.022	-387.949	52.7331	118.945	47.0273	106.057		5.31884e-05	5.30073e-05	5.31502e-05	5.29906e-05	5.32168e-05	5.30357e-05	5.31786e-05	5.3019e-05		0.0530983	9.36426e-05
53607	1247	41049	Oregon	Morrow County	-192.601	-434.339	-171.836	-387.297	52.6529	118.739	46.9762	105.879		5.31078e-05	5.29156e-05	5.30926e-05	5.29016e-05	5.31359e-05	5.29438e-05	5.31208e-05	5.29297e-05		0.0530185	0.000103804
55381	3021	37065	North Carolina	Edgecombe County	-191.869	-435.7	-171.182	-388.677	52.4536	119.113	46.798	106.257		5.29061e-05	5.30815e-05	5.28907e-05	5.30901e-05	5.29347e-05	5.31104e-05	5.29193e-05	5.3119e-05		0.0530065	0.000101642
55382	3022	50025	Vermont	Windham County	-192.085	-434.227	-171.348	-387.23	52.5126	118.71	46.8434	105.862		5.29656e-05	5.29021e-05	5.29419e-05	5.28923e-05	5.29943e-05	5.29309e-05	5.29706e-05	5.29211e-05		0.0529398	3.52414e-05
52406	46	18077	Indiana	Jefferson County	-191.817	-433.783	-171.146	-386.91	52.4391	118.588	46.7882	105.774		5.28916e-05	5.28479e-05	5.28796e-05	5.28486e-05	5.29201e-05	5.28765e-05	5.29082e-05	5.28773e-05		0.0528812	2.55107e-05
52435	75	37113	North Carolina	Macon County	-191.588	-433.057	-170.832	-386.082	52.3767	118.39	46.7023	105.548		5.28286e-05	5.27595e-05	5.27826e-05	5.27355e-05	5.28572e-05	5.27881e-05	5.28111e-05	5.27642e-05		0.0527908	3.97565e-05
53871	1511	39079	Ohio	Jackson County	-191.208	-433.328	-170.567	-386.431	52.2728	118.464	46.6298	105.643		5.27238e-05	5.27925e-05	5.27006e-05	5.27832e-05	5.27523e-05	5.28212e-05	5.2729e-05	5.28118e-05		0.0527643	4.4291e-05
52538	178	22075	Louisiana	Plaquemines Parish	-190.947	-432.346	-170.442	-385.667	52.2016	118.196	46.5958	105.435		5.26518e-05	5.26729e-05	5.26621e-05	5.26789e-05	5.26804e-05	5.27016e-05	5.26907e-05	5.27076e-05		0.0526808	1.89187e-05
55383	3023	13059	Georgia	Clarke County	-190.414	-432.969	-170.005	-386.264	52.0557	118.366	46.4764	105.597		5.25047e-05	5.27488e-05	5.25271e-05	5.27604e-05	5.25332e-05	5.27774e-05	5.25556e-05	5.27891e-05		0.0526495	0.000128894
52407	47	1017	Alabama	Chambers County	-191.059	-431.569	-170.39	-384.784	52.232	117.983	46.5817	105.193		5.26825e-05	5.25782e-05	5.26461e-05	5.25582e-05	5.27111e-05	5.26068e-05	5.26747e-05	5.25869e-05		0.0526306	5.58257e-05
52487	127	48003	Texas	Andrews County	-190.649	-431.632	-170.116	-384.934	52.1197	118	46.5063	105.233		5.25696e-05	5.25859e-05	5.25613e-05	5.25788e-05	5.25977e-05	5.26142e-05	5.25895e-05	5.2607e-05		0.052588	1.80574e-05
52692	332	30077	Montana	Powell County	-190.534	-430.967	-169.962	-384.332	52.0878	117.817	46.4638	105.068		5.25378e-05	5.25049e-05	5.25136e-05	5.24965e-05	5.25656e-05	5.25328e-05	5.25414e-05	5.25244e-05		0.0525271	2.22011e-05
52815	455	17191	Illinois	Wayne County	-190.402	-429.895	-169.824	-383.372	52.0523	117.525	46.4266	104.807		5.25015e-05	5.23743e-05	5.2471e-05	5.23654e-05	5.25298e-05	5.24026e-05	5.24993e-05	5.23937e-05		0.0524422	6.51391e-05
[truncated: 1,326 more rows]

## Sheet: Table S9
					Benefits in $									Fractions of Total Benefits									Mean Fraction of Benefits in ‰
					CC_D 3%		CC_D 7%		CC_N 3%		CC_N 7%			CC_D 3%		CC_D 7%		CC_N 3%		CC_N 7%
[truncated: 3,082 more rows]
